# Supplementary material
Source: publisher figshare collection journal article supplement (https://acs.figshare.com/ndownloader/files/10311102)
Supplement: Supplementary file 1 [file 10311102]

data_20160720b
_audit_creation_date              2016-07-21
_audit_creation_method
;
Olex2 1.2
(compiled 2015.09.30 svn.r3233 for OlexSys, GUI svn.r5103)
;
_publ_contact_author_address      ?
_publ_contact_author_email        ?
_publ_contact_author_name         ''
_publ_contact_author_phone        ?
_publ_section_references
;
Dolomanov, O.V., Bourhis, L.J., Gildea, R.J, Howard, J.A.K. & Puschmann, H.
 (2009), J. Appl. Cryst. 42, 339-341.

Sheldrick, G.M. (2015). Acta Cryst. A71, 3-8.

Sheldrick, G.M. (2015). Acta Cryst. C71, 3-8.
;
_chemical_name_common             ?
_chemical_name_systematic         ?
_chemical_formula_moiety          'C20 H18 O4'
_chemical_formula_sum             'C20 H18 O4'
_chemical_formula_weight          322.34
_chemical_melting_point           ?
_chemical_oxdiff_formula          c1h1o1
loop_
  _atom_type_symbol
  _atom_type_description
  _atom_type_scat_dispersion_real
  _atom_type_scat_dispersion_imag
  _atom_type_scat_source
 'C' 'C' 0.0181 0.0091 'International Tables Vol C Tables 4.2.6.8 and 6.1.1.4'
 'H' 'H' 0.0000 0.0000 'International Tables Vol C Tables 4.2.6.8 and 6.1.1.4'
 'O' 'O' 0.0492 0.0322 'International Tables Vol C Tables 4.2.6.8 and 6.1.1.4'

_shelx_space_group_comment
;
The symmetry employed for this shelxl refinement is uniquely defined
by the following loop, which should always be used as a source of
symmetry information in preference to the above space-group names.
They are only intended as comments.
;
_space_group_crystal_system       'monoclinic'
_space_group_IT_number            14
_space_group_name_H-M_alt         'P 1 21/c 1'
_space_group_name_Hall            '-P 2ybc'
loop_
  _space_group_symop_operation_xyz
 'x, y, z'
 '-x, y+1/2, -z+1/2'
 '-x, -y, -z'
 'x, -y-1/2, z-1/2'

_cell_length_a                    8.30129(8)
_cell_length_b                    22.3383(2)
_cell_length_c                    8.97393(10)
_cell_angle_alpha                 90
_cell_angle_beta                  96.2433(10)
_cell_angle_gamma                 90
_cell_volume                      1654.23(3)
_cell_formula_units_Z             4
_cell_measurement_reflns_used     8919
_cell_measurement_temperature     150.00(10)
_cell_measurement_theta_max       73.1360
_cell_measurement_theta_min       5.0240
_shelx_estimated_absorpt_T_max    ?
_shelx_estimated_absorpt_T_min    ?
_exptl_absorpt_coefficient_mu     0.732
_exptl_absorpt_correction_T_max   1.00000
_exptl_absorpt_correction_T_min   0.88207
_exptl_absorpt_correction_type    multi-scan
_exptl_absorpt_process_details
;
CrysAlisPro 1.171.39.6a (Rigaku Oxford Diffraction, 2015)
Empirical absorption correction using spherical harmonics,
 implemented in SCALE3 ABSPACK scaling algorithm.
;
_exptl_absorpt_special_details    ?
_exptl_crystal_colour             colourless
_exptl_crystal_colour_primary     colourless
_exptl_crystal_density_diffrn     1.294
_exptl_crystal_density_meas       ?
_exptl_crystal_density_method     ?
_exptl_crystal_description        block
_exptl_crystal_F_000              680
_exptl_crystal_size_max           0.3
_exptl_crystal_size_mid           0.2
_exptl_crystal_size_min           0.2
_exptl_transmission_factor_max    ?
_exptl_transmission_factor_min    ?
_diffrn_reflns_av_R_equivalents   0.0198
_diffrn_reflns_av_unetI/netI      0.0148
_diffrn_reflns_Laue_measured_fraction_full 1.000
_diffrn_reflns_Laue_measured_fraction_max 0.985
_diffrn_reflns_limit_h_max        10
_diffrn_reflns_limit_h_min        -10
_diffrn_reflns_limit_k_max        27
_diffrn_reflns_limit_k_min        -27
_diffrn_reflns_limit_l_max        11
_diffrn_reflns_limit_l_min        -10
_diffrn_reflns_number             14226
_diffrn_reflns_point_group_measured_fraction_full 1.000
_diffrn_reflns_point_group_measured_fraction_max 0.985
_diffrn_reflns_theta_full         67.684
_diffrn_reflns_theta_max          73.280
_diffrn_reflns_theta_min          3.958
_diffrn_ambient_environment       N~2~
_diffrn_ambient_temperature       150.00(10)
_diffrn_detector                  'CCD plate'
_diffrn_detector_area_resol_mean  5.3127
_diffrn_detector_type             AtlasS2
_diffrn_measured_fraction_theta_full 1.000
_diffrn_measured_fraction_theta_max 0.985
_diffrn_measurement_details
;
List of Runs (angles in degrees, time in seconds):

  # Type    Start    End  Width  t~exp~   \w     \q     \k     \f   Frames
--------------------------------------------------------------------------
  1  \w    -54.00 -28.00   1.00    1.00    --  -41.49 -77.00  90.00   26
  2  \w    -70.00 -18.00   1.00    1.00    --  -41.49 -37.00  90.00   52
  3  \w   -103.00 -61.00   1.00    1.00    --  -41.49 -57.00  90.00   42
  4  \w   -116.00 -18.00   1.00    1.00    --  -41.49 -37.00  30.00   98
  5  \w    -94.00 -20.00   1.00    1.00    --  -41.49 -57.00 -60.00   74
  6  \w      8.00  64.00   1.00    1.00    --   41.49 -99.00-120.00   56
  7  \w     21.00  72.00   1.00    1.00    --   41.49 -99.00   0.00   51
  8  \w     36.00 120.00   1.00    1.00    --  107.19-125.00 -30.00   84
  9  \w     47.00 130.00   1.00    1.00    --  107.19 -30.00  90.00   83
 10  \w     81.00 108.00   1.00    1.00    --  107.19  45.00 150.00   27
 11  \w     82.00 110.00   1.00    1.00    --  107.19  45.00 120.00   28
 12  \w     82.00 135.00   1.00    1.00    --  107.19  45.00  90.00   53
 13  \w    150.00 177.00   1.00    1.00    --  107.19  61.00  90.00   27
 14  \w    128.00 177.00   1.00    1.00    --  107.19  61.00  30.00   49
 15  \w    112.00 178.00   1.00    1.00    --  107.19  77.00  90.00   66
 16  \w     96.00 127.00   1.00    1.00    --  107.19 125.00 -90.00   31
 17  \w    144.00 170.00   1.00    1.00    --  107.19 125.00-150.00   26
 18  \w    128.00 155.00   1.00    1.00    --  107.19  45.00-180.00   27
 19  \w     82.00 143.00   1.00    1.00    --  107.19  30.00-180.00   61
 20  \w     81.00 119.00   1.00    1.00    --  107.19  45.00-180.00   38
 21  \w     37.00  72.00   1.00    1.00    --  107.19 -45.00 -60.00   35
 22  \w     84.00 113.00   1.00    1.00    --  107.19  45.00  60.00   29
 23  \w     78.00 104.00   1.00    1.00    --  107.19  61.00  90.00   26
 24  \w     78.00 104.00   1.00    1.00    --  107.19  61.00  60.00   26
 25  \w     82.00 107.00   1.00    1.00    --  107.19  61.00  30.00   25
 26  \w     76.00 101.00   1.00    1.00    --  107.19  77.00  90.00   25
 27  \w     76.00 101.00   1.00    1.00    --  107.19  77.00 120.00   25
 28  \w     78.00 104.00   1.00    1.00    --  107.19  61.00 120.00   26
 29  \w     78.00 104.00   1.00    1.00    --  107.19  61.00 150.00   26
 30  \w     75.00 101.00   1.00    1.00    --  107.19  77.00 150.00   26
 31  \w     75.00 102.00   1.00    1.00    --  107.19  77.00  60.00   27
 32  \w     33.00 140.00   1.00    1.00    --  107.19 -77.00 120.00  107
 33  \w     10.00  57.00   1.00    1.00    --   41.49 -99.00-180.00   47
;
_diffrn_measurement_device        'four-circle diffractometer'
_diffrn_measurement_device_type   'SuperNova, Dual, Cu at home/near, AtlasS2'
_diffrn_measurement_method        '\w scans'
_diffrn_orient_matrix_type
'CrysAlisPro convention (1999,Acta A55,543-557)'
_diffrn_orient_matrix_UB_11       0.1761119000
_diffrn_orient_matrix_UB_12       -0.0115503000
_diffrn_orient_matrix_UB_13       0.0667871000
_diffrn_orient_matrix_UB_21       0.0618299000
_diffrn_orient_matrix_UB_22       0.0321029000
_diffrn_orient_matrix_UB_23       -0.1346991000
_diffrn_orient_matrix_UB_31       0.0008521000
_diffrn_orient_matrix_UB_32       0.0599556000
_diffrn_orient_matrix_UB_33       0.0849422000
_diffrn_radiation_monochromator   mirror
_diffrn_radiation_probe           x-ray
_diffrn_radiation_type            CuK\a
_diffrn_radiation_wavelength      1.54184
_diffrn_source                    'micro-focus sealed X-ray tube'
_diffrn_source_type               'SuperNova (Cu) X-ray Source'
_reflns_Friedel_coverage          0.000
_reflns_Friedel_fraction_full     .
_reflns_Friedel_fraction_max      .
_reflns_number_gt                 3027
_reflns_number_total              3277
_reflns_odcompleteness_completeness 99.97
_reflns_odcompleteness_iscentric  1
_reflns_odcompleteness_theta      66.97
_reflns_special_details
;
 Reflections were merged by SHELXL according to the crystal
 class for the calculation of statistics and refinement.
 
 _reflns_Friedel_fraction is defined as the number of unique
 Friedel pairs measured divided by the number that would be
 possible theoretically, ignoring centric projections and
 systematic absences.
;
_reflns_threshold_expression      'I > 2\s(I)'
_computing_cell_refinement        'CrysAlisPro 1.171.39.6a (Rigaku OD, 2015)'
_computing_data_collection        'CrysAlisPro 1.171.39.6a (Rigaku OD, 2015)'
_computing_data_reduction         'CrysAlisPro 1.171.39.6a (Rigaku OD, 2015)'
_computing_molecular_graphics     'Olex2 (Dolomanov et al., 2009)'
_computing_publication_material   'Olex2 (Dolomanov et al., 2009)'
_computing_structure_refinement   'ShelXL (Sheldrick, 2015)'
_computing_structure_solution     'ShelXT (Sheldrick, 2015)'
_refine_diff_density_max          0.196
_refine_diff_density_min          -0.230
_refine_diff_density_rms          0.040
_refine_ls_extinction_coef        .
_refine_ls_extinction_method      none
_refine_ls_goodness_of_fit_ref    1.040
_refine_ls_hydrogen_treatment     constr
_refine_ls_matrix_type            full
_refine_ls_number_parameters      218
_refine_ls_number_reflns          3277
_refine_ls_number_restraints      0
_refine_ls_R_factor_all           0.0366
_refine_ls_R_factor_gt            0.0341
_refine_ls_restrained_S_all       1.040
_refine_ls_shift/su_max           0.001
_refine_ls_shift/su_mean          0.000
_refine_ls_structure_factor_coef  Fsqd
_refine_ls_weighting_details
'w=1/[\s^2^(Fo^2^)+(0.0408P)^2^+0.5673P] where P=(Fo^2^+2Fc^2^)/3'
_refine_ls_weighting_scheme       calc
_refine_ls_wR_factor_gt           0.0851
_refine_ls_wR_factor_ref          0.0871
_refine_special_details           ?
_olex2_refinement_description
;
1. Fixed Uiso
 At 1.2 times of:
  All C(H) groups, All C(H,H) groups
 At 1.5 times of:
  All C(H,H,H) groups
2.a Secondary CH2 refined with riding coordinates:
 C9(H9A,H9B), C12(H12A,H12B)
2.b Aromatic/amide H refined with riding coordinates:
 C2(H2), C3(H3), C4(H4), C5(H5), C13(H13), C14(H14), C16(H16), C17(H17),
 C18(H18), C19(H19), C20(H20)
2.c Idealised Me refined as rotating group:
 C11(H11A,H11B,H11C)
;
_atom_sites_solution_hydrogens    geom
_atom_sites_solution_primary      ?
_atom_sites_solution_secondary    ?
loop_
  _atom_site_label
  _atom_site_type_symbol
  _atom_site_fract_x
  _atom_site_fract_y
  _atom_site_fract_z
  _atom_site_U_iso_or_equiv
  _atom_site_adp_type
  _atom_site_occupancy
  _atom_site_site_symmetry_order
  _atom_site_calc_flag
  _atom_site_refinement_flags_posn
  _atom_site_refinement_flags_adp
  _atom_site_refinement_flags_occupancy
  _atom_site_disorder_assembly
  _atom_site_disorder_group
 O1 O 0.68695(9) 0.65371(3) 0.74513(9) 0.02232(18) Uani 1 1 d . . . . .
 O2 O 0.80001(10) 0.51472(3) 0.59613(9) 0.02656(19) Uani 1 1 d . . . . .
 O3 O 0.89915(10) 0.57114(5) 0.95064(10) 0.0384(2) Uani 1 1 d . . . . .
 O4 O 0.72310(10) 0.53547(4) 1.10154(9) 0.0311(2) Uani 1 1 d . . . . .
 C1 C 0.82474(13) 0.66636(5) 0.68135(12) 0.0208(2) Uani 1 1 d . . . . .
 C2 C 0.89561(14) 0.72273(5) 0.68336(14) 0.0269(3) Uani 1 1 d . . . . .
 H2 H 0.8531 0.7549 0.7321 0.032 Uiso 1 1 calc R . . . .
 C3 C 1.03285(14) 0.72881(5) 0.60920(14) 0.0306(3) Uani 1 1 d . . . . .
 H3 H 1.0821 0.7661 0.6069 0.037 Uiso 1 1 calc R . . . .
 C4 C 1.09946(14) 0.68059(5) 0.53772(14) 0.0288(3) Uani 1 1 d . . . . .
 H4 H 1.1911 0.6864 0.4884 0.035 Uiso 1 1 calc R . . . .
 C5 C 1.03017(13) 0.62433(5) 0.53975(12) 0.0240(2) Uani 1 1 d . . . . .
 H5 H 1.0752 0.5918 0.4945 0.029 Uiso 1 1 calc R . . . .
 C6 C 0.89024(13) 0.61793(5) 0.61210(12) 0.0202(2) Uani 1 1 d . . . . .
 C7 C 0.78721(12) 0.56661(5) 0.63432(11) 0.0200(2) Uani 1 1 d . . . . .
 C8 C 0.64525(13) 0.59122(5) 0.71287(12) 0.0203(2) Uani 1 1 d . . . . .
 C9 C 0.61826(13) 0.55916(5) 0.85767(12) 0.0228(2) Uani 1 1 d . . . . .
 H9A H 0.5311 0.5791 0.9018 0.027 Uiso 1 1 calc R . . . .
 H9B H 0.5834 0.5185 0.8336 0.027 Uiso 1 1 calc R . . . .
 C10 C 0.76399(13) 0.55684(5) 0.97193(12) 0.0240(2) Uani 1 1 d . . . . .
 C11 C 0.85457(18) 0.52910(8) 1.22004(15) 0.0466(4) Uani 1 1 d . . . . .
 H11A H 0.9318 0.5007 1.1902 0.070 Uiso 1 1 calc GR . . . .
 H11B H 0.8127 0.5152 1.3094 0.070 Uiso 1 1 calc GR . . . .
 H11C H 0.9066 0.5671 1.2392 0.070 Uiso 1 1 calc GR . . . .
 C12 C 0.48767(13) 0.58961(5) 0.60629(12) 0.0238(2) Uani 1 1 d . . . . .
 H12A H 0.4588 0.5481 0.5859 0.029 Uiso 1 1 calc R . . . .
 H12B H 0.4020 0.6074 0.6571 0.029 Uiso 1 1 calc R . . . .
 C13 C 0.49396(13) 0.62135(5) 0.45935(13) 0.0235(2) Uani 1 1 d . . . . .
 H13 H 0.5588 0.6552 0.4575 0.028 Uiso 1 1 calc R . . . .
 C14 C 0.41192(13) 0.60353(5) 0.33263(12) 0.0231(2) Uani 1 1 d . . . . .
 H14 H 0.3560 0.5676 0.3356 0.028 Uiso 1 1 calc R . . . .
 C15 C 0.39982(13) 0.63463(5) 0.18729(12) 0.0217(2) Uani 1 1 d . . . . .
 C16 C 0.51238(15) 0.67771(5) 0.15278(13) 0.0282(3) Uani 1 1 d . . . . .
 H16 H 0.6001 0.6868 0.2226 0.034 Uiso 1 1 calc R . . . .
 C17 C 0.49489(16) 0.70698(5) 0.01633(14) 0.0325(3) Uani 1 1 d . . . . .
 H17 H 0.5714 0.7352 -0.0052 0.039 Uiso 1 1 calc R . . . .
 C18 C 0.36374(16) 0.69456(5) -0.08885(14) 0.0309(3) Uani 1 1 d . . . . .
 H18 H 0.3510 0.7150 -0.1797 0.037 Uiso 1 1 calc R . . . .
 C19 C 0.25215(14) 0.65156(6) -0.05736(13) 0.0283(3) Uani 1 1 d . . . . .
 H19 H 0.1645 0.6428 -0.1276 0.034 Uiso 1 1 calc R . . . .
 C20 C 0.27084(13) 0.62150(5) 0.07896(13) 0.0241(2) Uani 1 1 d . . . . .
 H20 H 0.1964 0.5922 0.0984 0.029 Uiso 1 1 calc R . . . .

loop_
  _atom_site_aniso_label
  _atom_site_aniso_U_11
  _atom_site_aniso_U_22
  _atom_site_aniso_U_33
  _atom_site_aniso_U_23
  _atom_site_aniso_U_13
  _atom_site_aniso_U_12
 O1 0.0189(4) 0.0226(4) 0.0260(4) -0.0025(3) 0.0046(3) -0.0003(3)
 O2 0.0291(4) 0.0214(4) 0.0300(4) -0.0017(3) 0.0069(3) -0.0007(3)
 O3 0.0218(4) 0.0627(6) 0.0299(5) 0.0123(4) -0.0008(3) -0.0061(4)
 O4 0.0266(4) 0.0467(5) 0.0202(4) 0.0073(3) 0.0030(3) 0.0019(4)
 C1 0.0173(5) 0.0241(5) 0.0206(5) 0.0024(4) -0.0003(4) 0.0002(4)
 C2 0.0254(6) 0.0215(5) 0.0334(6) -0.0001(4) 0.0010(5) 0.0006(4)
 C3 0.0266(6) 0.0254(6) 0.0390(7) 0.0064(5) 0.0009(5) -0.0051(5)
 C4 0.0214(5) 0.0345(6) 0.0310(6) 0.0074(5) 0.0053(5) -0.0031(5)
 C5 0.0205(5) 0.0288(6) 0.0227(5) 0.0021(4) 0.0028(4) 0.0016(4)
 C6 0.0187(5) 0.0223(5) 0.0191(5) 0.0024(4) 0.0000(4) 0.0003(4)
 C7 0.0190(5) 0.0233(5) 0.0171(5) 0.0019(4) -0.0001(4) 0.0008(4)
 C8 0.0185(5) 0.0209(5) 0.0213(5) 0.0000(4) 0.0013(4) -0.0011(4)
 C9 0.0188(5) 0.0281(6) 0.0216(5) 0.0016(4) 0.0034(4) -0.0008(4)
 C10 0.0229(5) 0.0288(6) 0.0206(5) 0.0010(4) 0.0031(4) 0.0011(4)
 C11 0.0383(8) 0.0773(11) 0.0225(6) 0.0112(6) -0.0032(5) 0.0029(7)
 C12 0.0181(5) 0.0294(6) 0.0234(5) 0.0016(4) 0.0003(4) -0.0014(4)
 C13 0.0202(5) 0.0231(5) 0.0265(6) 0.0026(4) -0.0008(4) -0.0018(4)
 C14 0.0212(5) 0.0231(5) 0.0252(6) 0.0001(4) 0.0038(4) -0.0033(4)
 C15 0.0219(5) 0.0205(5) 0.0227(5) -0.0023(4) 0.0032(4) 0.0010(4)
 C16 0.0295(6) 0.0280(6) 0.0266(6) -0.0013(4) 0.0007(5) -0.0072(5)
 C17 0.0396(7) 0.0266(6) 0.0320(6) 0.0028(5) 0.0073(5) -0.0064(5)
 C18 0.0390(7) 0.0296(6) 0.0245(6) 0.0047(5) 0.0051(5) 0.0085(5)
 C19 0.0243(6) 0.0359(6) 0.0240(6) -0.0022(5) -0.0006(4) 0.0075(5)
 C20 0.0205(5) 0.0268(6) 0.0253(6) -0.0027(4) 0.0032(4) -0.0002(4)

_geom_special_details
;
 All esds (except the esd in the dihedral angle between two l.s. planes)
 are estimated using the full covariance matrix.  The cell esds are taken
 into account individually in the estimation of esds in distances, angles
 and torsion angles; correlations between esds in cell parameters are only
 used when they are defined by crystal symmetry.  An approximate (isotropic)
 treatment of cell esds is used for estimating esds involving l.s. planes.
;
loop_
  _geom_bond_atom_site_label_1
  _geom_bond_atom_site_label_2
  _geom_bond_distance
  _geom_bond_site_symmetry_2
  _geom_bond_publ_flag
 O1 C1 1.3631(13) . ?
 O1 C8 1.4596(12) . ?
 O2 C7 1.2166(13) . ?
 O3 C10 1.2017(14) . ?
 O4 C10 1.3348(14) . ?
 O4 C11 1.4456(15) . ?
 C1 C2 1.3892(16) . ?
 C1 C6 1.3877(15) . ?
 C2 H2 0.9300 . ?
 C2 C3 1.3871(17) . ?
 C3 H3 0.9300 . ?
 C3 C4 1.3982(18) . ?
 C4 H4 0.9300 . ?
 C4 C5 1.3830(16) . ?
 C5 H5 0.9300 . ?
 C5 C6 1.3983(15) . ?
 C6 C7 1.4570(14) . ?
 C7 C8 1.5389(14) . ?
 C8 C9 1.5215(15) . ?
 C8 C12 1.5346(14) . ?
 C9 H9A 0.9700 . ?
 C9 H9B 0.9700 . ?
 C9 C10 1.4993(15) . ?
 C11 H11A 0.9600 . ?
 C11 H11B 0.9600 . ?
 C11 H11C 0.9600 . ?
 C12 H12A 0.9700 . ?
 C12 H12B 0.9700 . ?
 C12 C13 1.5030(15) . ?
 C13 H13 0.9300 . ?
 C13 C14 1.3217(16) . ?
 C14 H14 0.9300 . ?
 C14 C15 1.4715(15) . ?
 C15 C16 1.3992(16) . ?
 C15 C20 1.3968(16) . ?
 C16 H16 0.9300 . ?
 C16 C17 1.3818(17) . ?
 C17 H17 0.9300 . ?
 C17 C18 1.3892(18) . ?
 C18 H18 0.9300 . ?
 C18 C19 1.3847(18) . ?
 C19 H19 0.9300 . ?
 C19 C20 1.3893(17) . ?
 C20 H20 0.9300 . ?

loop_
  _geom_angle_atom_site_label_1
  _geom_angle_atom_site_label_2
  _geom_angle_atom_site_label_3
  _geom_angle
  _geom_angle_site_symmetry_1
  _geom_angle_site_symmetry_3
  _geom_angle_publ_flag
 C1 O1 C8 107.86(8) . . ?
 C10 O4 C11 115.66(10) . . ?
 O1 C1 C2 123.78(10) . . ?
 O1 C1 C6 114.46(9) . . ?
 C6 C1 C2 121.77(10) . . ?
 C1 C2 H2 121.6 . . ?
 C3 C2 C1 116.82(11) . . ?
 C3 C2 H2 121.6 . . ?
 C2 C3 H3 119.0 . . ?
 C2 C3 C4 122.08(11) . . ?
 C4 C3 H3 119.0 . . ?
 C3 C4 H4 119.7 . . ?
 C5 C4 C3 120.54(11) . . ?
 C5 C4 H4 119.7 . . ?
 C4 C5 H5 121.1 . . ?
 C4 C5 C6 117.82(11) . . ?
 C6 C5 H5 121.1 . . ?
 C1 C6 C5 120.93(10) . . ?
 C1 C6 C7 106.72(9) . . ?
 C5 C6 C7 132.35(10) . . ?
 O2 C7 C6 129.83(10) . . ?
 O2 C7 C8 124.34(10) . . ?
 C6 C7 C8 105.77(9) . . ?
 O1 C8 C7 104.81(8) . . ?
 O1 C8 C9 109.54(8) . . ?
 O1 C8 C12 108.28(8) . . ?
 C9 C8 C7 114.47(9) . . ?
 C9 C8 C12 109.06(9) . . ?
 C12 C8 C7 110.45(9) . . ?
 C8 C9 H9A 108.6 . . ?
 C8 C9 H9B 108.6 . . ?
 H9A C9 H9B 107.6 . . ?
 C10 C9 C8 114.68(9) . . ?
 C10 C9 H9A 108.6 . . ?
 C10 C9 H9B 108.6 . . ?
 O3 C10 O4 124.32(10) . . ?
 O3 C10 C9 125.45(10) . . ?
 O4 C10 C9 110.22(9) . . ?
 O4 C11 H11A 109.5 . . ?
 O4 C11 H11B 109.5 . . ?
 O4 C11 H11C 109.5 . . ?
 H11A C11 H11B 109.5 . . ?
 H11A C11 H11C 109.5 . . ?
 H11B C11 H11C 109.5 . . ?
 C8 C12 H12A 108.5 . . ?
 C8 C12 H12B 108.5 . . ?
 H12A C12 H12B 107.5 . . ?
 C13 C12 C8 115.29(9) . . ?
 C13 C12 H12A 108.5 . . ?
 C13 C12 H12B 108.5 . . ?
 C12 C13 H13 118.4 . . ?
 C14 C13 C12 123.30(10) . . ?
 C14 C13 H13 118.4 . . ?
 C13 C14 H14 116.6 . . ?
 C13 C14 C15 126.84(10) . . ?
 C15 C14 H14 116.6 . . ?
 C16 C15 C14 122.55(10) . . ?
 C20 C15 C14 119.41(10) . . ?
 C20 C15 C16 118.04(10) . . ?
 C15 C16 H16 119.6 . . ?
 C17 C16 C15 120.88(11) . . ?
 C17 C16 H16 119.6 . . ?
 C16 C17 H17 119.8 . . ?
 C16 C17 C18 120.44(11) . . ?
 C18 C17 H17 119.8 . . ?
 C17 C18 H18 120.3 . . ?
 C19 C18 C17 119.48(11) . . ?
 C19 C18 H18 120.3 . . ?
 C18 C19 H19 119.9 . . ?
 C18 C19 C20 120.12(11) . . ?
 C20 C19 H19 119.9 . . ?
 C15 C20 H20 119.5 . . ?
 C19 C20 C15 121.01(11) . . ?
 C19 C20 H20 119.5 . . ?

loop_
  _geom_torsion_atom_site_label_1
  _geom_torsion_atom_site_label_2
  _geom_torsion_atom_site_label_3
  _geom_torsion_atom_site_label_4
  _geom_torsion
  _geom_torsion_site_symmetry_1
  _geom_torsion_site_symmetry_2
  _geom_torsion_site_symmetry_3
  _geom_torsion_site_symmetry_4
  _geom_torsion_publ_flag
 O1 C1 C2 C3 -177.96(10) . . . . ?
 O1 C1 C6 C5 178.98(9) . . . . ?
 O1 C1 C6 C7 -1.32(12) . . . . ?
 O1 C8 C9 C10 -62.26(12) . . . . ?
 O1 C8 C12 C13 59.08(12) . . . . ?
 O2 C7 C8 O1 176.42(9) . . . . ?
 O2 C7 C8 C9 56.39(14) . . . . ?
 O2 C7 C8 C12 -67.16(13) . . . . ?
 C1 O1 C8 C7 5.51(10) . . . . ?
 C1 O1 C8 C9 128.78(9) . . . . ?
 C1 O1 C8 C12 -112.39(9) . . . . ?
 C1 C2 C3 C4 -1.11(18) . . . . ?
 C1 C6 C7 O2 -178.16(11) . . . . ?
 C1 C6 C7 C8 4.67(11) . . . . ?
 C2 C1 C6 C5 -0.72(16) . . . . ?
 C2 C1 C6 C7 178.97(10) . . . . ?
 C2 C3 C4 C5 -0.49(19) . . . . ?
 C3 C4 C5 C6 1.50(17) . . . . ?
 C4 C5 C6 C1 -0.92(16) . . . . ?
 C4 C5 C6 C7 179.47(11) . . . . ?
 C5 C6 C7 O2 1.5(2) . . . . ?
 C5 C6 C7 C8 -175.68(11) . . . . ?
 C6 C1 C2 C3 1.71(17) . . . . ?
 C6 C7 C8 O1 -6.21(10) . . . . ?
 C6 C7 C8 C9 -126.24(9) . . . . ?
 C6 C7 C8 C12 110.21(10) . . . . ?
 C7 C8 C9 C10 55.09(13) . . . . ?
 C7 C8 C12 C13 -55.16(12) . . . . ?
 C8 O1 C1 C2 176.84(10) . . . . ?
 C8 O1 C1 C6 -2.85(12) . . . . ?
 C8 C9 C10 O3 -9.60(17) . . . . ?
 C8 C9 C10 O4 171.46(9) . . . . ?
 C8 C12 C13 C14 146.93(11) . . . . ?
 C9 C8 C12 C13 178.21(9) . . . . ?
 C11 O4 C10 O3 -0.94(18) . . . . ?
 C11 O4 C10 C9 178.01(11) . . . . ?
 C12 C8 C9 C10 179.39(9) . . . . ?
 C12 C13 C14 C15 174.28(10) . . . . ?
 C13 C14 C15 C16 20.18(18) . . . . ?
 C13 C14 C15 C20 -159.23(12) . . . . ?
 C14 C15 C16 C17 -178.48(11) . . . . ?
 C14 C15 C20 C19 177.59(10) . . . . ?
 C15 C16 C17 C18 0.69(19) . . . . ?
 C16 C15 C20 C19 -1.85(16) . . . . ?
 C16 C17 C18 C19 -1.42(19) . . . . ?
 C17 C18 C19 C20 0.52(18) . . . . ?
 C18 C19 C20 C15 1.15(17) . . . . ?
 C20 C15 C16 C17 0.94(18) . . . . ?

_shelx_res_file
;
    20160720b.res created by SHELXL-2014/7

TITL 20160720b_a.res in P2(1)/c
REM Old TITL 20160720b in P21/c #14
REM SHELXT solution in P2(1)/c
REM R1 0.117, Rweak 0.044, Alpha 0.018, Orientation as input
REM Formula found by SHELXT: C20 O4
CELL 1.54184 8.301291 22.338312 8.973931 90 96.2433 90
ZERR 4 0.000083 0.000232 0.0001 0 0.001 0
LATT 1
SYMM -X,0.5+Y,0.5-Z
SFAC C H O
UNIT 80 72 16

L.S. 5
PLAN  10
BOND $H
MORE -1
CONF
fmap 2
acta
REM <olex2.extras>
REM <HklSrc "%.\\20160720b.hkl">
REM </olex2.extras>

WGHT    0.040800    0.567300
FVAR       0.76840
O1    3    0.686950    0.653712    0.745127    11.00000    0.01890    0.02256 =
         0.02600   -0.00246    0.00461   -0.00033
O2    3    0.800013    0.514724    0.596127    11.00000    0.02905    0.02142 =
         0.03001   -0.00168    0.00689   -0.00065
O3    3    0.899152    0.571136    0.950645    11.00000    0.02182    0.06274 =
         0.02993    0.01232   -0.00080   -0.00611
O4    3    0.723100    0.535473    1.101544    11.00000    0.02655    0.04666 =
         0.02024    0.00734    0.00296    0.00191
C1    1    0.824741    0.666361    0.681353    11.00000    0.01726    0.02410 =
         0.02059    0.00239   -0.00033    0.00023
C2    1    0.895612    0.722733    0.683365    11.00000    0.02536    0.02153 =
         0.03344   -0.00013    0.00099    0.00056
AFIX  43
H2    2    0.853075    0.754866    0.732114    11.00000   -1.20000
AFIX   0
C3    1    1.032847    0.728810    0.609197    11.00000    0.02665    0.02540 =
         0.03904    0.00635    0.00093   -0.00511
AFIX  43
H3    2    1.082104    0.766144    0.606944    11.00000   -1.20000
AFIX   0
C4    1    1.099464    0.680586    0.537720    11.00000    0.02139    0.03450 =
         0.03101    0.00743    0.00526   -0.00312
AFIX  43
H4    2    1.191127    0.686386    0.488404    11.00000   -1.20000
AFIX   0
C5    1    1.030171    0.624332    0.539753    11.00000    0.02054    0.02882 =
         0.02267    0.00210    0.00280    0.00164
AFIX  43
H5    2    1.075165    0.591823    0.494485    11.00000   -1.20000
AFIX   0
C6    1    0.890245    0.617934    0.612098    11.00000    0.01874    0.02233 =
         0.01914    0.00237    0.00000    0.00027
C7    1    0.787205    0.566612    0.634322    11.00000    0.01902    0.02328 =
         0.01710    0.00186   -0.00010    0.00075
C8    1    0.645250    0.591220    0.712868    11.00000    0.01849    0.02091 =
         0.02129   -0.00002    0.00132   -0.00109
C9    1    0.618257    0.559162    0.857669    11.00000    0.01883    0.02814 =
         0.02160    0.00163    0.00339   -0.00083
AFIX  23
H9A   2    0.531078    0.579069    0.901828    11.00000   -1.20000
H9B   2    0.583354    0.518524    0.833647    11.00000   -1.20000
AFIX   0
C10   1    0.763991    0.556836    0.971932    11.00000    0.02286    0.02876 =
         0.02064    0.00097    0.00308    0.00114
C11   1    0.854572    0.529098    1.220044    11.00000    0.03835    0.07735 =
         0.02254    0.01120   -0.00323    0.00293
AFIX 137
H11A  2    0.931768    0.500718    1.190206    11.00000   -1.50000
H11B  2    0.812658    0.515214    1.309444    11.00000   -1.50000
H11C  2    0.906596    0.567129    1.239176    11.00000   -1.50000
AFIX   0
C12   1    0.487671    0.589610    0.606287    11.00000    0.01813    0.02935 =
         0.02340    0.00156    0.00029   -0.00135
AFIX  23
H12A  2    0.458793    0.548110    0.585870    11.00000   -1.20000
H12B  2    0.401999    0.607353    0.657054    11.00000   -1.20000
AFIX   0
C13   1    0.493961    0.621346    0.459352    11.00000    0.02024    0.02311 =
         0.02646    0.00259   -0.00080   -0.00182
AFIX  43
H13   2    0.558841    0.655221    0.457505    11.00000   -1.20000
AFIX   0
C14   1    0.411921    0.603531    0.332629    11.00000    0.02116    0.02313 =
         0.02519    0.00012    0.00380   -0.00332
AFIX  43
H14   2    0.355961    0.567560    0.335633    11.00000   -1.20000
AFIX   0
C15   1    0.399822    0.634632    0.187291    11.00000    0.02190    0.02053 =
         0.02274   -0.00228    0.00322    0.00095
C16   1    0.512379    0.677709    0.152781    11.00000    0.02947    0.02802 =
         0.02660   -0.00127    0.00065   -0.00716
AFIX  43
H16   2    0.600128    0.686761    0.222611    11.00000   -1.20000
AFIX   0
C17   1    0.494893    0.706978    0.016330    11.00000    0.03959    0.02664 =
         0.03204    0.00276    0.00726   -0.00637
AFIX  43
H17   2    0.571438    0.735181   -0.005236    11.00000   -1.20000
AFIX   0
C18   1    0.363738    0.694555   -0.088853    11.00000    0.03903    0.02955 =
         0.02447    0.00465    0.00514    0.00847
AFIX  43
H18   2    0.350981    0.714957   -0.179709    11.00000   -1.20000
AFIX   0
C19   1    0.252145    0.651558   -0.057359    11.00000    0.02425    0.03593 =
         0.02403   -0.00223   -0.00059    0.00746
AFIX  43
H19   2    0.164526    0.642786   -0.127586    11.00000   -1.20000
AFIX   0
C20   1    0.270843    0.621501    0.078957    11.00000    0.02045    0.02682 =
         0.02534   -0.00271    0.00323   -0.00018
AFIX  43
H20   2    0.196351    0.592190    0.098379    11.00000   -1.20000
AFIX   0
HKLF 4

REM  20160720b_a.res in P2(1)/c
REM R1 =  0.0341 for    3027 Fo > 4sig(Fo)  and  0.0366 for all    3277 data
REM    218 parameters refined using      0 restraints

END

WGHT      0.0408      0.5673

REM Highest difference peak  0.196,  deepest hole -0.230,  1-sigma level  0.040
Q1    1   0.8528  0.5922  0.6212  11.00000  0.05    0.20
Q2    1   0.7114  0.5773  0.6694  11.00000  0.05    0.19
Q3    1   0.6437  0.5736  0.7818  11.00000  0.05    0.17
Q4    1   0.5679  0.5918  0.6565  11.00000  0.05    0.17
Q5    1   0.5160  0.6776  0.4816  11.00000  0.05    0.17
Q6    1   0.8797  0.6388  0.6618  11.00000  0.05    0.17
Q7    1   0.4152  0.6202  0.2580  11.00000  0.05    0.16
Q8    1   0.8513  0.6429  0.6252  11.00000  0.05    0.16
Q9    1   0.5012  0.6017  0.5252  11.00000  0.05    0.16
Q10   1   0.3548  0.6202  0.1244  11.00000  0.05    0.16
;
_shelx_res_checksum               31143
_shelx_hkl_file
;
   0   0   1    0.83    0.14
   0   0   1    0.48    0.14
   0   0   2 1075.36   15.89
   0   0  -2 1092.61   16.45
   0   0   2 1077.10   16.26
   0   0  -3    0.19    0.30
   0   0   3    1.14    0.35
   0   0  -4  703.60   12.85
   0   0   4  741.81   11.73
   0   0  -5    0.29    0.45
   0   0  -6  186.45    5.99
   0   0   7    0.41    0.91
   0   0   7    0.89    1.02
   0   0  -7    0.26    0.72
   0   0   8   15.23    2.03
   0   0   8   12.58    1.76
   0   0   9    1.07    0.80
   0   0   9   -0.25    0.85
   0   0  10    0.87    0.61
   0   0  10    2.15    0.70
   0   0  10    1.79    0.76
   0  -1   1   25.56    0.68
   0  -1   1   24.62    0.63
   0  -1  -1   25.48    0.81
   0   1   1   25.51    0.86
   0   1  -1   25.47    0.82
   0   1  -2 3884.44   56.51
   0  -1   2 3925.78   56.09
   0  -1  -2 3912.73   56.48
   0  -1   2 4068.38   56.08
   0  -1   2 4001.53   56.43
   0   1   2 3874.99   55.76
   0   1   2 3956.27   56.54
   0  -1   3  305.72    5.53
   0   1  -3  299.18    6.11
   0  -1  -3  306.34    6.06
   0   1   3  300.39    5.99
   0   1   3  310.03    5.25
   0  -1   4  737.53   11.93
   0  -1  -4  726.05   12.96
   0   1  -4  726.86   13.01
   0  -1   5    5.26    0.67
   0  -1  -5    4.40    0.83
   0   1  -5    4.27    0.85
   0  -1  -6    2.81    0.87
   0   1  -6    0.98    0.68
   0   1  -7   36.44    2.80
   0   1   7   40.42    2.95
   0  -1  -7   45.71    3.09
   0  -1   7   40.89    3.18
   0  -1   7   43.15    3.02
   0  -1   8   34.05    2.85
   0   1   8   32.21    2.71
   0   1   8   33.66    2.97
   0   1   9   18.96    2.18
   0   1   9   21.41    2.17
   0   1   9   20.96    2.13
   0  -1   9   22.58    2.23
   0  -1   9   18.67    2.14
   0  -1  10   22.37    1.89
   0  -1  10   23.44    1.99
   0   1  10   23.08    1.85
   0   1  10   24.44    1.90
   0  -1  10   17.87    1.74
   0   1  10   22.15    1.93
   0   2   0  825.85   11.93
   0   2   0  818.00   11.94
   0  -2   0  828.97   11.98
   0   2  -1 2944.24   42.24
   0  -2   1 2966.07   42.08
   0  -2   1 2976.14   42.37
   0  -2   2    9.38    0.71
   0   2   2    9.95    0.77
   0  -2  -2   10.22    0.71
   0   2  -2   10.23    0.73
   0   2   3  844.53   12.46
   0  -2   3  883.89   13.65
   0   2   3  855.46   14.15
   0  -2  -3  883.77   14.09
   0  -2   3  866.43   14.06
   0   2  -3  893.01   14.24
   0  -2  -4  633.50   11.61
   0  -2   4  643.14   10.87
   0   2  -4  644.61   11.80
   0   2  -5  554.63   11.37
   0  -2   5  571.34   10.05
   0  -2  -6  247.74    7.09
   0   2  -6  253.16    7.29
   0  -2   7   57.81    3.75
   0   2   7   58.25    3.75
   0   2  -7   62.14    3.69
   0  -2   7   60.24    3.61
   0  -2  -7   56.19    3.42
   0   2   7   56.12    3.47
   0   2   8   38.71    3.03
   0   2   8   41.38    3.35
   0  -2   8   37.12    3.01
   0   2   9  114.51    4.91
   0   2   9  112.74    4.95
   0   2   9  112.53    5.19
   0  -2   9  101.77    4.93
   0  -2   9  103.42    4.80
   0   2  10    5.73    1.00
   0   2  10    6.19    0.99
   0   2  10    6.56    1.14
   0  -2  10    4.36    0.91
   0  -2  10    7.36    1.20
   0  -2  10    4.43    1.00
   0  -3   0   -0.12    0.13
   0   3   0    0.13    0.13
   0   3   0    0.00    0.12
   0  -3  -1  245.70    3.73
   0   3   1  244.03    4.27
   0   3   1  242.18    4.37
   0  -3   1  230.95    4.43
   0   3  -1  242.01    4.29
   0  -3   2  167.09    3.27
   0  -3  -2  160.55    3.48
   0   3  -2  164.47    3.59
   0  -3   2  156.85    3.61
   0   3  -3    0.18    0.34
   0  -3   3    0.83    0.37
   0  -3  -4    7.98    0.94
   0   3  -4    6.39    0.88
   0  -3   4    7.09    0.76
   0  -3   5  443.18    8.59
   0   3  -5  433.15    9.68
   0  -3  -5  446.43    9.50
   0  -3  -6  348.53    8.79
   0   3   6  370.43    8.80
   0   3  -6  342.95    9.02
   0  -3   7   -0.84    0.89
   0   3   7    0.22    0.89
   0  -3   7    1.13    0.89
   0   3   7    0.74    0.94
   0  -3   7    0.42    0.98
   0  -3  -7    0.84    0.67
   0   3  -7    0.87    0.72
   0   3   8  981.20   20.52
   0   3   8  974.81   19.77
   0   3   8  974.95   19.82
   0  -3   8  969.71   19.87
   0  -3   9    8.23    1.49
   0   3   9    8.25    1.46
   0   3   9    7.75    1.45
   0  -3   9   10.07    1.61
   0   3   9    7.20    1.46
   0   3  10    6.34    0.98
   0   3  10    7.77    1.08
   0  -3  10    5.84    1.09
   0  -3  10    7.10    1.16
   0   3  10    5.92    1.13
   0  -3  10    5.25    0.98
   0   4   0 4292.59   61.45
   0   4   0 4353.88   61.43
   0  -4   0 4360.48   61.55
   0  -4   1   86.32    2.28
   0   4   1   90.00    2.13
   0  -4   2   22.59    1.24
   0  -4   2   27.03    1.12
   0   4  -2   24.19    1.19
   0   4   2   23.92    1.19
   0  -4   3  625.30   11.39
   0   4   3  636.18   11.58
   0   4   3  654.05   11.26
   0  -4  -3  651.60   11.19
   0   4  -3  664.08   11.45
   0  -4   3  664.47   10.67
   0   4  -4  266.20    6.30
   0  -4   4  270.51    5.78
   0   4   5  161.53    4.88
   0  -4   5  156.70    4.32
   0  -4  -5  151.60    4.75
   0   4  -5  152.69    5.02
   0  -4  -6   13.30    1.54
   0   4   6   11.72    1.39
   0   4  -6   11.91    1.56
   0   4  -7   52.03    3.49
   0  -4   7   60.45    3.81
   0   4   7   55.11    3.72
   0  -4   7   56.91    3.63
   0   4   7   55.25    3.44
   0  -4  -7   54.66    3.34
   0  -4   7   57.63    3.59
   0   4   8   99.73    4.83
   0  -4   8  100.30    4.93
   0   4   8   97.66    5.07
   0   4   8   99.07    4.77
   0   4   9  248.37    7.49
   0   4   9  243.28    7.40
   0  -4   9  242.46    7.68
   0   4   9  231.55    7.77
   0  -4   9  237.51    7.75
   0  -4  10  137.04    4.76
   0  -4  10  129.73    4.71
   0   4  10  137.95    4.42
   0   4  10  136.02    4.87
   0   5   0    0.39    0.24
   0   5   0    0.23    0.23
   0  -5   0    0.26    0.26
   0  -5  -1  721.16   10.73
   0   5   1  691.49   11.50
   0   5   1  721.61   11.28
   0  -5   1  699.19   11.56
   0  -5   2   35.31    1.63
   0   5  -2   36.28    1.54
   0  -5   2   38.33    1.46
   0   5   2   39.57    1.63
   0   5   2   37.31    1.68
   0  -5  -3  276.19    5.74
   0   5  -3  268.33    5.92
   0   5   3  274.73    5.88
   0  -5   3  262.07    5.31
   0  -5   3  265.53    6.02
   0   5   3  267.41    6.10
   0  -5  -4  158.57    4.44
   0   5   4  167.90    4.64
   0   5  -4  167.75    4.79
   0  -5   4  163.47    4.36
   0   5   5   20.46    1.67
   0  -5   5   25.14    1.65
   0  -5  -5   23.39    1.75
   0   5  -5   24.57    1.94
   0   5   6  321.74    8.25
   0  -5   6  302.43    8.83
   0   5  -6  312.18    8.61
   0   5   6  306.18    8.98
   0  -5  -6  310.54    8.16
   0   5  -7   51.32    3.44
   0  -5   7   52.75    3.47
   0   5   7   50.03    3.57
   0  -5  -7   51.53    3.24
   0   5   7   52.94    3.42
   0  -5   7   54.55    3.66
   0   5   7   53.37    3.43
   0   5   8  418.03   10.91
   0  -5   8  435.31   11.39
   0   5   8  419.96   10.96
   0   5   8  413.02   11.56
   0   5   9   87.11    4.02
   0   5   9   83.47    3.98
   0   5   9   79.83    4.27
   0  -5   9   81.86    4.16
   0   5  10    8.97    1.27
   0  -5  10    9.23    1.25
   0  -5  10    9.84    1.30
   0  -6   0   12.37    0.77
   0   6   0   10.94    0.68
   0   6   0   11.03    0.71
   0  -6   1  264.71    5.41
   0   6   1  271.69    5.17
   0   6   1  261.47    5.33
   0  -6  -1  274.29    4.71
   0  -6   2  189.91    4.13
   0   6   2  195.04    4.41
   0  -6  -2  175.29    2.96
   0   6   2  191.06    4.57
   0   6  -2  184.85    4.23
   0  -6   2  191.78    4.53
   0   6   3  927.05   15.66
   0   6   3  940.47   16.02
   0   6  -3  909.36   15.65
   0  -6  -3  927.31   15.34
   0  -6   3  947.49   16.00
   0  -6   3  936.36   15.07
   0   6  -4  271.26    6.62
   0   6   4  263.20    6.41
   0  -6   4  263.63    6.65
   0  -6  -4  261.78    6.18
   0   6  -5   81.92    3.63
   0  -6   5   71.83    3.03
   0   6   5   84.13    3.51
   0  -6  -5   78.85    3.30
   0   6   6  103.11    4.32
   0  -6  -6  103.23    4.25
   0   6   6   98.44    4.75
   0  -6   6  100.32    3.76
   0   6  -6   90.26    4.30
   0  -6   6   94.74    4.62
   0  -6   6  102.41    4.51
   0   6  -7  286.79    8.94
   0  -6   7  295.25    8.71
   0   6   7  284.79    9.18
   0  -6   7  289.31    9.16
   0   6   7  295.30    8.65
   0   6   7  290.34    8.61
   0  -6  -7  300.67    8.50
   0   6   8   40.18    2.95
   0  -6   8   38.03    3.02
   0   6   8   39.13    3.19
   0   6   8   38.67    2.89
   0  -6   9   28.28    2.48
   0   6   9   31.43    2.37
   0   6   9   30.96    2.61
   0  -6  10    1.31    0.62
   0   6  10    1.40    0.59
   0  -6  10    1.18    0.57
   0   7   0    0.32    0.26
   0   7   0    0.22    0.22
   0  -7   0    0.15    0.25
   0   7   1 1027.51   16.91
   0   7   1 1096.27   17.26
   0  -7  -1 1073.81   16.17
   0  -7   1 1056.66   17.07
   0   7   1 1088.15   16.73
   0  -7  -2    0.67    0.19
   0   7   2    0.39    0.37
   0  -7   2    0.68    0.32
   0   7   2    0.94    0.40
   0  -7  -2    1.34    0.19
   0  -7  -3 1970.43   30.02
   0   7   3 1950.47   30.55
   0   7  -3 1990.18   30.52
   0   7   3 1951.53   30.92
   0  -7   3 1960.23   30.87
   0  -7   3 1961.16   29.85
   0  -7   4  181.40    5.40
   0  -7  -4  186.85    4.96
   0   7   4  179.00    5.18
   0   7  -4  180.02    5.27
   0   7  -5    3.38    0.88
   0   7   5    2.80    0.76
   0  -7  -5    2.20    0.73
   0  -7   5    2.89    0.70
   0   7   6   14.03    1.84
   0  -7   6   15.30    1.67
   0  -7   6   17.43    1.91
   0   7   6   18.36    1.82
   0  -7   6   13.92    1.82
   0   7   6   16.80    1.83
   0   7  -6   12.76    1.63
   0  -7   6   12.83    1.52
   0  -7   6   14.54    1.43
   0  -7  -6   14.95    1.64
   0   7   7   18.85    2.08
   0  -7   7   16.15    1.98
   0  -7   7   16.92    2.12
   0  -7   7   19.45    1.94
   0   7   7   19.53    2.33
   0  -7   8   70.03    4.07
   0   7   8   58.78    3.94
   0   7   8   68.01    3.78
   0   7   9    0.73    0.72
   0   7   9   -0.06    0.58
   0  -7   9    0.64    0.65
   0   7  10    2.83    0.77
   0  -7  10    1.90    0.69
   0  -7  10    1.79    0.67
   0  -8   0  114.77    3.02
   0   8   0  110.88    2.89
   0   8   1  315.22    6.49
   0  -8   1  328.19    6.71
   0  -8  -1  327.22    5.89
   0   8   1  334.85    6.86
   0   8   1  325.25    6.35
   0   8   2  113.75    3.55
   0  -8  -2  112.85    2.36
   0   8   2  106.07    3.45
   0  -8  -2  108.18    2.29
   0  -8   2  104.64    3.18
   0  -8   2  109.04    3.53
   0  -8   3   89.42    3.05
   0   8   3   97.12    3.58
   0  -8  -3   99.71    3.14
   0  -8   3  100.03    3.61
   0   8   3   97.27    3.44
   0  -8  -4    2.89    0.66
   0   8   4    2.49    0.71
   0  -8   4    3.47    0.85
   0  -8  -5  217.61    6.09
   0   8   5  225.83    6.58
   0  -8   5  220.82    6.20
   0  -8   6  176.04    6.63
   0  -8   6  172.44    5.52
   0  -8   6  174.36    6.35
   0   8   6  167.32    6.02
   0   8   6  170.23    6.01
   0  -8   6  175.15    5.90
   0  -8   6  169.54    5.90
   0  -8   6  162.44    5.89
   0   8   6  167.69    6.52
   0  -8  -6  178.06    5.77
   0  -8   6  174.30    5.60
   0  -8   7   94.81    5.00
   0  -8   7   95.57    4.35
   0  -8   7   99.19    4.84
   0   8   7   94.99    5.00
   0   8   7   99.83    4.65
   0  -8   8   66.66    3.98
   0   8   8   67.67    3.71
   0   8   8   59.07    3.90
   0   8   9   90.34    4.36
   0  -8   9   91.96    4.29
   0   8  10   55.64    2.72
   0  -8  10   57.08    2.76
   0  -8  10   52.84    2.57
   0   9   0    0.21    0.28
   0  -9   0    0.14    0.30
   0  -9   1 2704.06   41.08
   0  -9  -1 2760.91   40.04
   0   9   1 2837.35   41.50
   0   9  -1 2731.31   40.28
   0   9   1 2693.69   40.83
   0   9   1 2705.64   40.61
   0  -9   2  885.92   15.54
   0   9   2  909.60   15.57
   0  -9  -2  886.09   13.55
   0  -9   2  864.04   14.95
   0   9   2  861.76   15.38
   0  -9   3  221.42    5.99
   0   9   3  206.68    5.73
   0  -9   3  218.59    5.40
   0  -9  -3  212.41    5.20
   0   9   4  111.15    4.17
   0  -9  -4  108.79    3.73
   0  -9   4  108.15    4.29
   0  -9   4  111.91    3.66
   0  -9  -5  184.57    5.51
   0  -9   5  185.90    5.75
   0   9   5  186.22    6.05
   0  -9   6    1.45    0.85
   0  -9   6    4.03    1.06
   0  -9   6    2.45    1.01
   0  -9   6    3.20    0.95
   0  -9   6    0.69    0.78
   0  -9   6    2.21    0.95
   0   9   6    2.37    1.12
   0   9   6    1.96    0.79
   0  -9   6    2.76    0.98
   0   9   6    1.36    0.85
   0   9   7    2.92    0.97
   0   9   7    0.74    0.85
   0  -9   7   -0.76    0.73
   0  -9   7    0.21    0.80
   0  -9   7    0.22    0.81
   0  -9   7    0.25    0.68
   0  -9   8  179.03    6.68
   0   9   8  183.91    6.28
   0   9   8  171.31    6.75
   0   9   9    2.04    0.83
   0  -9   9    2.03    0.89
   0  -9  10   39.80    2.11
   0  -9  10   41.16    2.25
   0   9  10   41.63    2.24
   0  10   0    9.95    0.88
   0 -10   0    9.69    0.92
   0  10  -1  653.54   11.36
   0 -10  -1  666.76   11.09
   0 -10   1  652.34   12.03
   0 -10  -1  626.84   11.20
   0  10   1  660.11   11.61
   0  10   1  694.61   12.55
   0 -10   2  190.44    5.34
   0 -10   2  190.23    5.03
   0  10   2  191.39    5.35
   0 -10   3   53.28    2.48
   0  10   3   53.65    2.77
   0 -10   3   55.34    2.87
   0 -10  -3   57.08    2.41
   0 -10   4  101.24    3.60
   0 -10   4   99.96    4.24
   0 -10  -4   99.05    3.58
   0  10   4   95.41    4.03
   0 -10   5  405.59   10.10
   0 -10   5  414.33   10.48
   0  10   5  398.67   10.61
   0 -10   5  406.08    9.70
   0  10   5  406.57   10.13
   0 -10   5  414.62    9.93
   0 -10   5  401.05   10.48
   0  10   6    4.51    1.15
   0 -10   6    3.82    1.04
   0 -10   6    5.03    1.22
   0  10   6    4.02    1.17
   0 -10   6    4.30    1.21
   0  10   6    6.40    1.33
   0 -10   6    1.61    0.93
   0 -10   6    5.29    1.24
   0 -10   6    5.92    1.26
   0 -10   6    7.21    1.32
   0 -10   7   86.30    3.92
   0 -10   7   95.05    4.82
   0  10   7   84.10    4.72
   0  10   7   94.52    4.48
   0 -10   7   92.89    4.90
   0 -10   7   90.21    4.29
   0 -10   8   14.83    1.94
   0  10   8    9.48    1.69
   0 -10   9    2.50    0.89
   0  10   9    0.82    0.76
   0 -10  10  134.96    4.15
   0  10  10  138.91    4.11
   0 -11   0    0.18    0.33
   0  11   0    1.09    0.43
   0  11  -1  548.91   10.13
   0 -11  -1  563.88    9.84
   0 -11   1  561.29   10.83
   0 -11  -1  541.46   10.02
   0  11   1  552.30   10.35
   0 -11   2  680.85   12.85
   0 -11   2  675.19   13.27
   0  11   2  711.75   13.45
   0  11   3   40.67    2.47
   0 -11   3   40.94    2.55
   0 -11   3   42.71    2.30
   0 -11  -3   37.92    2.02
   0 -11   4 1095.90   19.22
   0 -11   4 1098.96   20.69
   0  11   4 1114.59   20.42
   0  11   5   25.61    2.46
   0 -11   5   28.12    2.50
   0 -11   5   31.72    2.42
   0  11   5   28.46    2.39
   0 -11   5   30.15    2.34
   0 -11   5   26.52    2.39
   0 -11   5   30.14    2.44
   0  11   6   62.00    3.95
   0 -11   6   58.46    3.65
   0  11   6   61.30    3.57
   0  11   6   63.57    3.81
   0 -11   6   61.50    3.59
   0 -11   6   60.04    3.29
   0 -11   6   62.35    3.82
   0 -11   6   56.61    3.75
   0 -11   6   61.07    3.43
   0 -11   6   61.70    3.53
   0  11   7   41.54    3.28
   0 -11   7   44.16    2.76
   0 -11   7   46.72    3.47
   0 -11   7   43.98    3.26
   0 -11   7   41.73    2.91
   0  11   8   33.76    2.79
   0 -11   8   35.02    2.84
   0 -11   9   21.10    1.92
   0  11   9   19.81    1.90
   0  11  10   22.59    1.44
   0 -11  10   21.76    1.48
   0  12   0   82.27    2.94
   0 -12   0   82.00    3.03
   0  12  -1  997.41   16.64
   0 -12   1  991.38   17.45
   0  12   1 1005.21   16.91
   0 -12  -1  967.27   16.47
   0 -12   2  641.11   12.98
   0  12   2  662.23   13.24
   0 -12   2  634.19   12.52
   0  12  -2  644.71   11.81
   0 -12   3    1.31    0.68
   0  12   3    2.49    0.75
   0 -12   3    1.86    0.63
   0  12   4    4.09    1.01
   0 -12   4    5.13    0.92
   0  12   4    3.35    1.10
   0 -12   5    2.62    0.89
   0 -12   5    1.62    0.76
   0 -12   5    1.28    1.03
   0 -12   5    2.19    0.88
   0  12   5    2.35    1.01
   0 -12   5    2.42    1.05
   0  12   5    0.69    0.72
   0 -12   5    1.33    0.93
   0 -12   6    4.11    1.06
   0 -12   6    3.82    1.09
   0 -12   6    3.68    1.02
   0 -12   6    2.90    0.99
   0 -12   6    2.67    0.80
   0  12   6    2.82    1.07
   0 -12   6    2.76    0.97
   0 -12   6    3.65    0.94
   0 -12   7   49.03    3.18
   0  12   7   48.07    3.51
   0 -12   7   48.56    2.90
   0 -12   7   43.93    3.33
   0 -12   7   52.01    3.53
   0  12   8   -0.08    0.84
   0 -12   8    0.87    0.78
   0 -12   9  176.77    5.60
   0  12   9  171.51    5.52
   0  13   0    0.22    0.36
   0 -13   0    0.35    0.34
   0 -13   0   -0.08    0.41
   0  13   1   11.41    1.17
   0 -13  -1   11.08    1.08
   0 -13   1   11.52    1.29
   0  13  -1   13.68    1.20
   0 -13   2  459.27   10.51
   0  13  -2  479.57    9.53
   0 -13   2  459.53   10.18
   0 -13   3  830.96   15.94
   0 -13   3  796.91   16.66
   0  13   3  840.62   16.77
   0 -13   4   87.48    4.23
   0  13  -4   86.96    3.82
   0  13   4   83.18    4.30
   0 -13   4   88.75    4.11
   0 -13   4   90.39    4.05
   0  13   4   94.35    4.36
   0 -13   4   94.48    3.89
   0 -13   5  108.24    5.15
   0 -13   5  106.13    4.74
   0 -13   5  108.26    4.83
   0 -13   5  104.00    4.90
   0  13   5  102.45    5.05
   0 -13   5  107.05    4.70
   0  13  -5  111.50    4.47
   0 -13   5   99.09    4.90
   0  13   5  108.60    4.96
   0 -13   6    8.55    1.43
   0 -13   6    6.29    1.45
   0 -13   6    4.47    1.24
   0 -13   6   11.11    1.60
   0 -13   6    8.34    1.32
   0  13  -6   10.98    1.43
   0  13   6   10.11    1.66
   0 -13   7   10.62    1.41
   0 -13   7   11.48    1.59
   0 -13   7   10.61    1.75
   0 -13   7   13.71    1.88
   0  13   7   10.92    1.80
   0 -13   8   20.67    1.77
   0 -13   8   20.70    2.10
   0  13   8   22.50    2.13
   0  13   9  220.52    6.13
   0 -13   9  220.13    6.21
   0 -14   0   26.18    1.78
   0  14   0   23.89    1.66
   0 -14   0   25.27    1.86
   0  14   1  664.34   12.80
   0 -14   1  661.33   13.31
   0  14  -1  673.89   12.59
   0 -14   2    3.92    0.95
   0  14  -2    5.03    0.85
   0 -14   2    3.23    0.87
   0  14   3   24.03    2.20
   0  14   3   28.52    2.14
   0  14  -3   29.81    1.97
   0 -14   3   26.42    2.33
   0 -14   3   32.90    2.31
   0 -14   4   86.51    4.56
   0 -14   4   92.55    4.02
   0  14   4   92.86    4.55
   0 -14   4  100.24    4.59
   0 -14   4   92.45    4.18
   0 -14   4   89.58    4.20
   0  14   4   85.87    4.45
   0  14  -4   89.29    3.99
   0  14  -5   64.12    3.37
   0  14   5   56.89    3.76
   0 -14   5   57.16    3.70
   0 -14   5   62.65    3.65
   0 -14   5   62.62    3.57
   0  14   5   64.18    3.88
   0 -14   5   60.21    3.94
   0 -14   5   60.30    3.72
   0 -14   5   60.92    3.61
   0  14   6    1.28    1.00
   0 -14   6    1.83    0.87
   0 -14   6    1.11    0.76
   0 -14   6    2.20    1.03
   0 -14   6    2.67    1.08
   0 -14   6    1.41    0.73
   0 -14   7   10.45    1.56
   0 -14   7   12.94    1.81
   0 -14   7   11.79    1.74
   0  14   7   11.64    1.74
   0 -14   7   13.07    1.56
   0 -14   8   -0.49    0.52
   0 -14   8    0.58    0.74
   0  14   8    0.33    0.68
   0 -14   9  113.99    3.96
   0  14   9  104.52    3.73
   0  15   0    0.10    0.38
   0 -15   0    0.44    0.51
   0 -15   1  349.94    8.68
   0  15  -1  359.46    8.14
   0 -15   1  336.64    8.84
   0  15   1  358.40    8.29
   0 -15   1  350.42    8.87
   0  15   2   56.08    3.29
   0  15  -2   60.81    2.83
   0 -15   2   56.11    3.24
   0 -15   2   54.64    3.11
   0 -15   2   55.91    3.34
   0  15   2   51.81    2.94
   0 -15   3   83.66    3.88
   0 -15   3   73.74    4.12
   0 -15   3   80.36    3.83
   0  15   3   80.80    4.15
   0  15  -3   77.78    3.71
   0  15   3   80.62    3.77
   0 -15   4   95.90    4.25
   0 -15   4   93.14    4.33
   0  15   4   84.45    4.48
   0 -15   4   95.54    4.36
   0 -15   4   98.84    4.58
   0  15  -4   95.66    4.19
   0 -15   4   98.48    4.99
   0 -15   5  204.07    7.29
   0 -15   5  196.33    6.76
   0 -15   5  192.13    6.91
   0 -15   5  184.30    6.66
   0  15   5  183.15    7.02
   0  15  -5  204.17    6.38
   0  15   6    0.95    1.04
   0 -15   6    0.74    0.84
   0 -15   6    0.03    0.71
   0 -15   6    0.66    0.80
   0 -15   6    0.55    0.80
   0 -15   6    1.37    0.85
   0 -15   7   12.04    1.43
   0 -15   7   11.97    1.58
   0 -15   7   10.90    1.66
   0  15   7   10.90    1.69
   0 -15   7    8.87    1.49
   0 -15   8   39.92    2.60
   0  15   8   34.34    2.42
   0 -15   8   32.12    2.07
   0 -15   9   13.78    1.28
   0  15   9   15.54    1.30
   0 -16   0   16.44    1.64
   0  16   0   14.16    1.64
   0  16   0   14.75    1.46
   0 -16   1   61.20    3.22
   0 -16   1   57.80    3.27
   0 -16   1   52.74    3.15
   0  16   1   51.87    2.98
   0  16  -1   55.37    2.79
   0  16   1   59.25    3.34
   0 -16   2  809.16   16.95
   0 -16   2  838.23   16.75
   0  16   2  801.79   16.69
   0 -16   2  818.85   16.48
   0  16   2  796.96   16.03
   0  16  -2  787.42   15.91
   0 -16   3  158.41    5.75
   0  16   3  158.69    5.63
   0  16   3  156.50    6.09
   0  16  -3  151.88    5.53
   0 -16   3  162.18    6.42
   0 -16   3  166.85    5.77
   0 -16   4   51.27    3.46
   0 -16   4   54.63    3.26
   0 -16   4   53.74    3.53
   0  16  -4   63.71    3.38
   0 -16   4   57.08    3.85
   0  16   4   56.53    3.62
   0 -16   4   57.88    3.39
   0 -16   4   55.46    3.35
   0 -16   5    9.15    1.53
   0  16  -5   10.42    1.47
   0 -16   5    9.96    1.55
   0  16   5   10.40    1.72
   0 -16   5   10.44    1.63
   0 -16   5   11.12    1.78
   0 -16   5    9.68    1.54
   0 -16   6   35.27    2.75
   0 -16   6   34.46    2.87
   0  16   6   32.73    2.83
   0 -16   6   31.86    2.64
   0 -16   6   33.91    2.52
   0 -16   6   32.15    2.60
   0 -16   7   96.33    4.58
   0 -16   7   99.13    4.31
   0 -16   7   94.08    4.19
   0 -16   7   91.70    4.33
   0  16   7   95.68    4.47
   0 -16   7   97.50    3.93
   0  16   8    0.24    0.60
   0 -16   8    0.57    0.54
   0 -16   8    1.06    0.62
   0  16   9    1.44    0.45
   0 -16   9    1.32    0.45
   0 -17   0    0.19    0.56
   0  17   0    0.74    0.79
   0  17   0    0.27    0.64
   0  17   1  232.12    7.10
   0 -17   1  236.75    7.39
   0  17   1  237.29    6.89
   0  17   1  243.79    7.54
   0 -17   1  261.16    7.77
   0  17   2    1.86    0.86
   0 -17   2    2.42    0.98
   0  17   2    1.26    0.72
   0 -17   2    0.09    0.76
   0  17  -3   61.99    3.42
   0 -17   3   63.75    3.63
   0 -17   3   67.29    3.54
   0 -17   3   63.41    3.97
   0  17   3   55.65    3.31
   0  17   3   67.71    3.92
   0 -17   4   -0.58    0.77
   0  17  -4    2.03    0.83
   0 -17   4    0.52    0.67
   0  17   4    0.14    0.90
   0 -17   4   -0.13    0.83
   0  17   5   -0.52    1.05
   0 -17   5   -0.33    0.85
   0 -17   5   -0.18    0.73
   0 -17   5    1.45    0.93
   0 -17   5    0.34    0.69
   0 -17   6    2.37    0.99
   0  17   6    2.97    1.16
   0 -17   6    3.27    1.03
   0 -17   6    1.82    0.89
   0 -17   6    2.79    1.07
   0 -17   6    1.60    0.79
   0  17   7    1.14    0.81
   0 -17   7    1.01    0.61
   0 -17   7    1.92    0.78
   0 -17   7    1.93    0.88
   0 -17   7    1.11    0.66
   0 -17   8   26.51    1.87
   0  17   8   22.35    1.73
   0 -17   8   26.66    1.67
   0 -18   0  102.10    4.72
   0  18   0   99.31    4.33
   0  18   1    0.44    0.78
   0 -18   1    0.14    0.93
   0 -18  -1    1.26    0.91
   0  18   1    0.10    0.67
   0 -18   1    1.36    0.89
   0  18   1    1.84    0.93
   0  18   2   -0.04    0.84
   0 -18   2   -0.70    0.71
   0  18   2   -0.55    0.73
   0 -18   2    1.27    0.98
   0 -18  -2   -0.16    0.78
   0  18   3  488.85   12.32
   0 -18   3  508.88   11.71
   0  18   3  513.43   11.90
   0  18   4   31.21    2.76
   0 -18   4   30.22    2.45
   0 -18   4   33.81    2.64
   0 -18   4   29.80    2.64
   0  18  -4   31.71    2.41
   0 -18   5   50.65    3.42
   0 -18   5   44.68    3.08
   0  18   5   44.06    3.22
   0 -18   5   51.29    3.18
   0 -18   6  139.45    5.10
   0 -18   6  144.17    5.30
   0 -18   6  157.16    5.65
   0 -18   6  145.56    5.37
   0  18   6  146.29    5.67
   0 -18   6  147.06    5.73
   0 -18   7    0.39    0.57
   0  18   7    0.18    0.59
   0 -18   7    0.10    0.49
   0 -18   7    0.22    0.51
   0  18   8    0.83    0.47
   0 -18   8    0.04    0.48
   0 -18   8    0.70    0.39
   0  19   0   -0.01    0.81
   0  19   0    0.18    0.72
   0  19   1   58.61    3.24
   0 -19  -1   58.94    3.60
   0  19  -1   61.95    3.50
   0  19   1   61.05    3.49
   0  19   1   59.54    3.62
   0 -19   1   63.48    3.76
   0  19   2  275.02    8.13
   0  19   2  289.25    8.65
   0  19   3  382.38   10.38
   0 -19   3  357.70    9.94
   0  19   3  382.75    9.84
   0 -19   4    5.72    1.28
   0 -19   4    7.94    1.34
   0 -19   4    6.77    1.29
   0  19   4    6.03    1.37
   0 -19   5    9.71    1.56
   0 -19   5   12.13    1.55
   0  19   5   11.01    1.69
   0 -19   5   10.78    1.54
   0  19   6   47.84    2.98
   0 -19   6   51.11    3.13
   0 -19   6   46.71    2.71
   0 -19   6   46.72    2.85
   0  19   7   23.06    1.81
   0 -19   7   22.78    1.74
   0 -19   7   19.03    1.60
   0 -19   7   20.65    1.48
   0 -19   8    0.47    0.39
   0  19   8    0.87    0.43
   0  20   0  203.97    6.75
   0  20   0  198.95    6.51
   0  20   1  216.52    7.26
   0  20  -1  204.31    6.75
   0  20   1  205.45    6.85
   0  20   1  204.67    6.41
   0  20   2   48.88    3.12
   0  20   2   46.74    3.24
   0  20   3   11.64    1.71
   0  20   3   11.72    1.61
   0 -20   3    8.19    1.29
   0 -20   3   10.93    1.59
   0 -20   4   76.59    3.66
   0 -20   4   75.46    4.01
   0  20   4   81.13    4.19
   0 -20   4   79.01    3.87
   0 -20   5   60.25    3.37
   0  20   5   59.38    3.45
   0 -20   5   65.34    3.58
   0 -20   5   62.15    3.27
   0 -20   6    7.32    1.17
   0  20   6    7.48    1.18
   0 -20   6    5.84    1.03
   0 -20   6    4.90    0.92
   0  20   7    1.92    0.58
   0 -20   7    1.91    0.64
   0 -20   7    2.00    0.57
   0 -20   7    1.99    0.61
   0  21   0    0.19    0.60
   0  21   0    0.96    0.69
   0  21   1   41.77    2.65
   0  21  -1   42.71    2.88
   0  21   1   41.90    2.90
   0  21  -1   43.17    2.90
   0  21   2  498.51   12.14
   0  21   2  508.60   11.78
   0  21  -2  476.11   11.66
   0  21   3   11.56    1.66
   0 -21   3   12.29    1.60
   0 -21   3   11.07    1.40
   0 -21   4    9.32    1.30
   0 -21   4    7.78    1.21
   0 -21   4    8.21    1.31
   0  21   4    9.89    1.52
   0  21   5    1.53    0.77
   0 -21   5    1.54    0.73
   0 -21   5    0.82    0.53
   0 -21   5    1.16    0.68
   0 -21   5    0.96    0.68
   0 -21   6   31.94    2.07
   0 -21   6   27.59    1.82
   0  21   6   32.14    2.12
   0 -21   6   27.56    1.98
   0 -21   6   30.00    2.06
   0  21  -7    9.54    0.92
   0  21   7   10.79    1.05
   0 -21   7    9.23    0.94
   0 -21   7    9.85    0.96
   0  22   0   21.52    1.97
   0  22   0   21.42    2.07
   0  22  -1   74.04    3.74
   0  22  -1   77.83    3.80
   0  22   1   75.81    3.85
   0  22   1   79.18    3.56
   0  22   2   54.88    3.21
   0  22  -2   48.74    2.93
   0  22  -2   52.41    3.12
   0 -22   3  162.06    5.51
   0  22  -3  153.76    5.17
   0 -22   3  156.44    5.29
   0  22   3  173.52    6.05
   0  22  -3  160.03    5.65
   0  22  -4    7.14    0.98
   0 -22   4    4.08    0.95
   0 -22   4    6.30    1.11
   0  22  -4    8.76    1.28
   0  22   4    7.08    1.20
   0 -22   4    6.17    1.01
   0 -22   5   69.66    3.23
   0  22   5   80.34    3.53
   0 -22   5   77.72    3.31
   0  22  -5   74.44    3.27
   0 -22   5   73.69    3.15
   0 -22   5   78.30    3.41
   0 -22   6   26.31    1.71
   0 -22   6   27.10    1.55
   0 -22   6   26.91    1.64
   0  22  -6   27.01    1.70
   0 -22   6   28.33    1.81
   0  22   6   30.06    1.86
   0  23   0   -0.18    0.60
   0  23   0   -0.12    0.54
   0  23  -1   32.86    2.38
   0  23  -1   37.02    2.52
   0  23   1   35.70    2.24
   0  23   1   41.57    2.71
   0 -23   2    3.26    0.79
   0  23   2    3.92    1.00
   0  23  -2    3.76    0.95
   0  23  -2    2.16    0.79
   0 -23   3   62.51    3.17
   0  23  -3   60.03    3.15
   0  23  -3   60.83    2.85
   0 -23   3   64.42    3.03
   0  23   4    0.19    0.59
   0  23  -4    0.23    0.49
   0 -23   4   -0.45    0.44
   0 -23   4   -0.18    0.49
   0 -23   4   -0.20    0.64
   0 -23   5    7.08    1.00
   0  23  -5    8.60    1.09
   0  23   5    8.79    1.15
   0 -23   5    8.53    1.08
   0 -23   5    9.20    1.07
   0 -23   6    4.90    0.73
   0 -23   6    4.51    0.68
   0  23  -6    5.02    0.72
   0  24   0   15.35    1.46
   0  24   0   16.35    1.62
   0  24  -1    2.76    0.81
   0  24   1    2.04    0.79
   0  24  -1    2.44    0.74
   0  24  -2   25.79    1.87
   0  24  -2   24.60    1.92
   0 -24   2   24.49    1.86
   0 -24   2   25.69    1.78
   0  24  -3   15.10    1.27
   0 -24   3   15.22    1.48
   0  24  -3   16.43    1.54
   0 -24   3   16.31    1.38
   0 -24   4   54.32    2.38
   0 -24   4   56.73    2.65
   0 -24   4   57.15    2.63
   0  24  -4   57.52    2.66
   0 -24   5   10.10    1.01
   0  24  -5   11.17    1.05
   0 -24   5    9.39    0.97
   0 -24   5   10.05    1.04
   0  25   0   -0.62    0.42
   0  25   0    1.50    0.63
   0  25  -1    0.78    0.50
   0  25  -1    1.68    0.60
   0  25   1    2.71    0.81
   0  25  -2   48.05    2.45
   0  25  -2   51.53    2.39
   0 -25   2   53.75    2.47
   0 -25   3   -0.11    0.48
   0  25  -3    1.03    0.53
   0 -25   3    1.64    0.58
   0  25  -3    0.34    0.45
   0  25  -4    0.27    0.39
   0 -25   4   -0.04    0.42
   0 -25   4   -0.44    0.53
   0 -25   4    0.10    0.40
   0  26   0    1.29    0.53
   0  26  -1   24.81    1.58
   0  26  -1   23.84    1.48
   0  26  -2    7.28    0.87
   0 -26   2    6.56    0.81
   0  26  -2    7.65    0.85
   0 -26   3    2.91    0.65
   0  26  -3    3.51    0.63
   0 -27   2   11.38    0.94
  -1   0  11   -0.28    0.40
  -1   0  10    0.07    0.73
  -1   0  10    1.38    0.67
  -1   0   9    0.66    0.88
  -1   0   9    1.09    0.83
  -1   0   8  333.27    9.35
  -1   0   8  337.42   10.41
  -1   0   7    2.70    0.96
  -1   0   7    0.08    0.87
   1   0  -7    0.68    0.80
  -1   0   7    0.02    0.60
   1   0  -6    3.40    0.86
  -1   0   5    0.09    0.33
   1   0  -5    0.12    0.44
  -1   0   4  909.69   15.06
  -1   0   4  888.89   14.52
   1   0  -4  907.58   15.18
  -1   0   4  883.15   13.89
  -1   0   3    0.23    0.19
   1   0  -3    0.09    0.25
  -1   0   3    0.25    0.23
  -1   0   3    0.74    0.32
  -1   0   2 1614.42   23.56
  -1   0   2 1559.07   23.62
  -1   0   2 1613.64   23.25
   1   0  -2 1595.41   23.61
  -1   0   1    0.20    0.19
  -1   0   1    0.63    0.17
  -1   0   0  702.23   10.58
  -1   0  -1    0.05    0.21
  -1   0  -2 6508.51   92.39
   1   0   2 6462.79   91.76
   1   0   3    0.22    0.19
   1   0   3    0.21    0.27
  -1   0  -4  174.73    4.81
  -1   0  -5    0.07    0.57
  -1   0  -6  470.95   11.09
  -1   0  -7    0.51    0.89
   1   0   7   -0.56    0.85
   1   0   8  673.79   15.25
   1   0   8  664.79   15.35
   1   0   9   -0.39    0.75
   1   0   9    0.71    0.77
   1   0   9   -0.32    0.68
   1   0  10    0.67    0.65
   1   0  10    0.29    0.53
   1   0  10    0.43    0.57
  -1   1  11   14.45    1.20
  -1  -1  11   14.61    1.18
  -1  -1  10    0.94    0.66
  -1  -1  10   -0.17    0.58
  -1   1  10   -0.40    0.60
  -1  -1  10    0.46    0.55
  -1   1   9   27.36    2.67
  -1  -1   9   29.07    2.41
  -1   1   9   27.95    2.31
  -1  -1   9   26.64    2.62
  -1  -1   8  128.75    5.39
  -1  -1   8  130.77    6.07
  -1   1   8  122.55    5.82
  -1   1   8  129.74    5.34
  -1   1   8  130.84    6.13
  -1   1   7   36.47    3.11
  -1  -1   7   40.06    3.17
  -1   1   7   36.37    2.39
   1   1  -7   36.52    2.77
  -1   1   7   44.67    2.98
   1  -1  -7   38.49    2.76
  -1  -1   7   36.08    2.72
  -1  -1   7   37.73    2.90
   1  -1  -6   19.59    1.77
   1   1  -6   19.91    1.82
  -1  -1   5   25.29    1.55
   1   1  -5   22.75    1.73
   1  -1  -5   25.33    1.74
  -1  -1   5   27.82    1.57
  -1   1   5   24.93    1.71
  -1  -1   4  597.67   10.45
   1   1  -4  605.51   10.93
   1  -1  -4  571.80   10.64
  -1   1   4  567.53   10.79
  -1  -1   4  588.99   10.28
  -1  -1   4  590.18    9.92
   1   1  -3  605.05   10.41
   1  -1  -3  600.48   10.24
  -1  -1   3  629.06   10.11
  -1   1   3  607.11    9.34
  -1  -1   3  593.02   10.12
  -1  -1   3  590.17    9.87
  -1   1   3  611.44   10.52
   1  -1  -2  263.47    4.70
  -1   1   2  248.33    4.92
  -1  -1   2  261.42    4.67
  -1  -1   2  251.82    4.64
   1   1  -2  266.47    4.91
  -1  -1   2  254.34    4.75
  -1   1   2  266.44    4.33
   1  -1  -1 1607.84   22.82
  -1   1   1 1579.63   22.96
  -1   1   1 1567.77   23.02
  -1   1   1 1592.64   22.56
  -1  -1   1 1606.51   23.14
  -1  -1   1 1604.23   23.16
  -1   1   0  307.44    4.98
  -1  -1   0  294.62    4.67
  -1  -1   0  291.43    4.87
  -1   1  -1 3681.65   52.25
  -1  -1  -1 3648.20   52.14
   1  -1   2 5868.64   81.98
   1   1   2 5766.12   81.44
   1   1   2 5752.95   80.83
  -1   1  -2 5906.92   82.29
  -1  -1  -2 5720.89   82.39
   1  -1   2 5713.27   80.95
   1   1   3   12.07    0.47
   1   1   3   12.47    0.75
  -1   1  -3   10.94    0.95
   1  -1   3   12.59    0.90
  -1  -1  -3   11.83    1.03
   1  -1   4    2.37    0.40
  -1   1  -4    2.21    0.64
  -1  -1  -4    1.35    0.52
   1  -1   4    1.40    0.43
  -1  -1  -5  163.02    5.16
  -1   1  -5  170.49    5.28
  -1   1  -6    6.06    1.17
  -1  -1  -6    4.53    1.01
   1   1   7  232.48    7.84
   1   1   7  253.61    8.17
  -1  -1  -7  246.88    7.95
   1  -1   7  239.98    7.91
  -1   1  -7  239.30    7.87
   1  -1   8   64.01    3.89
   1   1   8   68.92    4.03
   1   1   8   69.59    4.14
   1  -1   8   68.03    4.10
   1   1   9   24.07    2.26
   1  -1   9   24.58    2.29
   1  -1   9   27.29    2.47
   1  -1   9   28.51    2.38
   1   1   9   26.31    2.43
   1   1   9   24.69    2.22
   1  -1  10    0.35    0.53
   1  -1  10    1.01    0.57
   1   1  10    0.24    0.52
   1   1  10   -0.12    0.59
   1   1  10    0.10    0.53
   1  -1  10    1.03    0.73
  -1   2  11   30.69    1.70
  -1  -2  11   33.29    1.76
  -1  -2  10   44.57    2.86
  -1  -2  10   44.21    2.49
  -1   2  10   42.35    2.81
  -1  -2  10   44.23    2.57
  -1   2   9   74.80    3.80
  -1  -2   9   69.98    3.75
  -1  -2   9   73.85    4.25
  -1   2   9   76.45    4.37
  -1   2   9   74.44    3.71
  -1   2   8  253.60    8.80
  -1  -2   8  266.92    8.23
  -1   2   8  275.97    8.16
  -1  -2   8  266.87    8.98
  -1  -2   7  288.43    9.13
  -1   2   7  299.19    9.45
  -1   2   7  285.90    7.57
  -1  -2   7  289.45    8.51
   1   2  -7  305.77    8.78
   1  -2  -7  314.90    8.59
  -1  -2   7  290.52    8.82
  -1   2   7  301.12    8.51
   1   2  -6  169.57    5.71
   1  -2  -6  177.26    5.59
  -1  -2   5    3.52    0.66
  -1  -2   5    2.74    0.52
   1  -2  -5    3.87    0.75
   1   2  -5    4.33    0.88
  -1   2   5    4.05    0.78
  -1   2   4  280.57    6.54
  -1  -2   4  291.05    5.84
   1  -2  -4  294.86    6.29
  -1  -2   4  288.63    5.87
   1   2  -4  289.75    6.52
  -1  -2   4  287.86    6.02
  -1  -2   3   32.79    1.41
  -1   2   3   32.43    0.90
  -1  -2   3   29.78    1.34
   1   2  -3   31.81    1.53
  -1  -2   3   31.40    1.30
   1  -2  -3   31.13    1.38
  -1   2   3   30.71    1.57
  -1   2   2    6.90    0.47
  -1   2   2    7.13    0.39
   1  -2  -2    6.99    0.52
  -1  -2   2    6.56    0.47
  -1  -2   2    6.67    0.59
  -1  -2   2    6.54    0.58
   1   2  -2    6.24    0.60
  -1   2   1 2128.63   30.57
  -1   2   1 2185.18   30.44
  -1   2   1 2097.60   30.78
  -1  -2   1 2072.60   30.83
  -1  -2   1 2157.52   30.95
   1  -2  -1 2135.16   30.24
  -1  -2   0    4.22    0.30
   1   2   0    5.36    0.38
  -1   2   0    4.59    0.22
  -1  -2   0    5.50    0.35
  -1  -2  -1  210.03    3.26
  -1  -2  -1  205.61    3.72
  -1   2  -1  205.80    3.77
  -1   2  -2  940.31   14.59
   1  -2   2  917.00   14.55
   1   2   2  924.30   13.54
   1  -2   3 4044.61   58.48
  -1  -2  -3 3928.02   58.85
  -1   2  -3 4087.81   58.76
   1  -2   4  797.68   13.67
  -1  -2  -4  774.99   14.14
   1  -2   4  800.10   12.83
  -1   2  -4  776.05   14.13
  -1   2  -5  124.21    4.44
  -1  -2  -5  126.98    4.48
  -1  -2  -6  293.54    8.16
  -1   2  -6  289.45    8.19
   1  -2   6  302.10    8.42
   1   2   7 1600.04   29.49
  -1   2  -7 1686.45   29.83
   1  -2   7 1624.38   29.58
   1   2   7 1622.84   29.60
   1   2   8  172.68    6.72
   1   2   8  182.06    6.81
   1  -2   8  172.17    6.59
   1   2   8  186.84    6.99
   1  -2   8  186.63    6.95
   1  -2   9   14.40    1.76
   1   2   9   11.84    1.62
   1   2   9   12.89    1.76
   1  -2   9   13.85    1.79
   1   2   9   14.71    1.82
   1  -2  10    6.56    1.08
   1   2  10    6.86    1.07
   1   2  10    5.96    0.99
   1  -2  10    6.19    1.04
   1  -2  10    8.72    1.11
   1   2  10    6.54    0.96
  -1   3  11    4.71    0.74
  -1   3  10   20.52    1.93
  -1  -3  10   18.06    1.61
  -1  -3  10   19.59    1.87
  -1   3   9   14.72    2.04
  -1  -3   9   13.35    1.67
  -1  -3   8  761.03   17.21
  -1  -3   8  734.45   16.19
  -1   3   8  777.50   16.06
  -1   3   8  753.87   17.31
  -1  -3   7   21.18    2.14
  -1  -3   7   25.66    2.45
  -1  -3   7   19.56    2.20
   1  -3  -7   26.02    2.25
  -1   3   7   19.65    2.35
  -1   3   7   20.68    2.37
  -1   3   7   23.52    2.25
   1   3  -7   24.58    2.32
   1  -3  -6  175.22    5.56
   1   3  -6  170.37    5.84
  -1  -3   6  182.91    5.13
  -1  -3   5  378.33    7.72
   1  -3  -5  372.91    8.20
  -1   3   5  391.41    7.89
   1   3  -5  360.63    8.55
  -1  -3   5  376.85    7.87
  -1   3   5  360.80    8.54
  -1  -3   4  111.05    3.27
   1  -3  -4  103.40    3.24
  -1  -3   4  108.16    3.23
  -1   3   4  118.69    3.21
  -1  -3   4  110.38    2.83
  -1   3   4  106.86    3.63
   1   3  -4  113.77    3.65
  -1  -3   3 1878.67   27.00
  -1  -3   3 1813.53   27.69
  -1   3   3 1790.47   27.26
   1  -3  -3 1853.75   27.42
  -1  -3   3 1845.44   27.71
   1   3  -3 1809.03   27.98
  -1   3   3 1826.98   28.27
   1   3  -2    9.22    0.76
  -1  -3   2   11.21    0.80
  -1  -3   2   11.01    0.77
   1  -3  -2    9.83    0.59
  -1   3   2   11.15    0.66
  -1   3   2   10.19    0.44
  -1  -3   1   99.48    2.29
  -1  -3   1   98.84    2.23
   1  -3  -1   94.58    1.66
  -1   3   1  100.54    2.12
  -1  -3   1   97.68    2.37
  -1  -3   0 4009.55   57.30
  -1  -3   0 4059.80   57.56
   1   3   0 3944.20   57.58
  -1   3   0 3971.19   56.79
  -1  -3   0 4165.27   57.40
  -1  -3  -1 6433.57   92.00
  -1   3  -1 6651.67   92.43
  -1  -3  -1 6576.50   91.71
  -1  -3  -1 6485.64   92.35
   1  -3   2  424.05    7.67
  -1   3  -2  430.16    7.56
  -1  -3  -2  414.99    6.28
   1  -3   3 2728.67   40.96
  -1   3  -3 2816.85   41.06
  -1  -3  -3 2708.87   41.17
   1  -3   3 2755.75   39.58
   1  -3   4    3.24    0.65
  -1   3  -4    4.01    0.77
  -1   3  -5   84.77    3.63
  -1  -3  -5   86.02    3.62
  -1   3  -6   44.07    2.90
   1   3   6   43.56    2.95
   1  -3   6   43.03    2.88
  -1  -3  -6   43.15    2.80
   1   3   7   60.01    3.72
   1   3   7   65.38    3.82
   1   3   7   59.79    3.76
  -1   3  -7   63.31    3.85
  -1  -3  -7   61.53    3.72
   1  -3   7   56.97    3.68
   1  -3   8    0.60    0.75
   1   3   8    1.70    0.83
   1   3   8    0.94    1.11
   1   3   8    0.73    0.73
   1   3   9   49.48    3.21
   1   3   9   56.41    3.39
   1   3   9   49.39    3.23
   1  -3   9   55.18    3.42
   1  -3   9   55.57    3.28
   1   3  10   12.62    1.32
   1   3  10   13.37    1.36
   1  -3  10   11.76    1.38
   1  -3  10   12.97    1.42
   1   3  10   13.60    1.39
   1  -3  10   13.17    1.35
  -1  -4  10   43.98    2.48
  -1  -4  10   41.63    2.68
  -1   4  10   41.23    2.73
  -1   4   9    2.80    1.12
  -1  -4   9    3.57    1.00
  -1  -4   8   26.44    2.61
  -1  -4   8   28.64    2.57
  -1  -4   8   30.61    2.87
  -1   4   8   26.49    2.74
  -1  -4   7    3.56    1.12
   1  -4  -7    4.12    1.10
  -1   4   7    2.99    1.12
  -1  -4   7    1.65    0.88
  -1   4   7    2.38    1.23
   1  -4  -6   -0.09    0.56
   1   4  -6    1.07    0.67
  -1   4   5   87.72    3.68
  -1  -4   5   93.19    3.29
  -1   4   5   91.72    3.20
   1  -4  -5   88.52    3.32
  -1  -4   5   90.87    3.24
   1   4  -5   94.96    3.79
   1   4  -4  583.78   11.07
  -1   4   4  573.60   10.28
  -1   4   4  568.33   11.24
   1  -4  -4  593.00   10.44
  -1  -4   4  555.53   10.55
  -1  -4   4  565.14   10.48
   1   4  -3   88.66    2.89
  -1   4   3   91.23    3.06
  -1  -4   3   90.22    2.05
  -1  -4   3   91.93    2.78
  -1  -4   3   85.43    2.76
   1  -4  -3   85.86    2.44
  -1   4   3   88.38    2.52
   1  -4  -2 3648.34   52.00
  -1   4   2 3648.75   52.43
  -1  -4   2 3684.77   52.79
  -1  -4   2 3595.28   52.94
   1  -4  -1 6450.65   90.53
  -1  -4   1 6503.23   91.53
  -1  -4   1 6533.45   91.79
  -1   4   1 6347.09   91.42
   1   4   0 2677.49   39.28
  -1  -4   0 2649.08   38.96
  -1  -4   0 2728.40   39.16
   1   4   0 2747.67   38.46
  -1  -4  -1   37.22    1.18
   1  -4   1   38.08    1.50
  -1   4  -1   36.13    1.19
   1  -4   2  337.92    6.71
  -1  -4  -2  345.12    5.75
  -1   4  -2  352.97    6.45
  -1  -4  -3    3.86    0.67
   1  -4   3    4.18    0.71
  -1   4  -3    4.26    0.65
   1  -4   3    5.38    0.51
  -1   4  -4   54.21    2.52
   1  -4   4   57.22    2.55
  -1  -4  -4   53.24    2.54
  -1  -4  -5  301.78    7.70
  -1   4  -5  309.37    7.85
  -1  -4  -6    6.70    1.20
   1   4   6    6.37    1.30
   1  -4   6    7.11    1.30
   1  -4   6    7.75    1.37
   1   4   6    8.64    1.39
   1   4   6    7.85    1.25
   1   4   7  135.79    5.82
   1   4   7  135.19    5.81
   1   4   7  138.59    5.84
   1  -4   7  139.09    5.82
  -1  -4  -7  142.43    5.74
  -1   4  -7  137.26    5.87
   1   4   7  146.83    5.88
   1  -4   8  215.32    7.51
   1   4   8  217.75    7.56
   1   4   8  205.11    7.43
   1   4   8  211.13    7.47
   1   4   9   57.73    3.40
   1  -4   9   58.43    3.51
   1   4   9   63.13    3.59
   1   4   9   58.44    3.43
   1  -4   9   52.26    3.18
   1   4  10    1.56    0.62
   1   4  10    1.87    0.65
   1  -4  10    1.67    0.65
   1  -4  10    3.07    0.83
   1   4  10    3.52    0.82
  -1  -5  10    5.30    0.94
  -1   5  10    3.51    0.94
  -1  -5  10    5.79    1.14
  -1  -5   9    4.56    1.09
  -1   5   9    5.25    1.31
  -1  -5   8  133.65    5.91
  -1   5   8  117.93    5.78
  -1  -5   8  129.34    5.53
  -1  -5   8  131.06    5.74
  -1  -5   7   -0.22    0.71
  -1   5   7    0.02    0.83
  -1  -5   7    0.53    0.77
  -1  -5   7    1.00    0.85
  -1   5   7    0.32    0.71
  -1  -5   6  337.07    9.38
  -1  -5   6  370.39    8.32
  -1   5   6  323.13    9.48
   1   5  -6  346.85    9.16
   1  -5  -6  360.87    8.54
  -1   5   6  329.52    9.66
  -1   5   5  132.58    4.11
  -1  -5   5  128.75    4.11
   1  -5  -5  133.53    4.15
   1   5  -5  131.65    4.64
  -1  -5   5  126.47    4.14
  -1   5   5  132.27    4.72
  -1   5   4 3135.61   47.02
  -1  -5   4 3175.67   47.57
   1   5  -4 3133.77   47.92
  -1  -5   4 3191.79   47.42
   1  -5  -4 3201.45   46.99
  -1   5   4 3190.08   48.30
  -1   5   3   91.93    2.74
  -1   5   3   96.42    3.26
  -1  -5   3   90.77    2.89
  -1  -5   3   95.28    3.05
   1  -5  -3   92.07    2.54
  -1  -5   2 2949.84   43.06
   1  -5  -2 2900.40   41.85
  -1  -5   2 2941.01   42.59
  -1   5   2 2902.53   43.26
  -1   5   2 2948.41   42.57
  -1   5   2 2871.26   42.76
  -1   5   1 9939.92  140.04
   1  -5  -1 9878.88  138.69
  -1  -5   1 9894.99  140.11
  -1   5   1 9763.72  139.81
  -1  -5   1 9999.00  139.82
  -1   5   0 7708.96  105.80
   1   5   0 7465.28  105.31
  -1  -5   0 7427.95  106.04
   1   5   0 7303.39  106.24
  -1  -5   0 7438.66  105.88
  -1   5  -1  704.33   11.02
   1  -5   1  691.68   11.74
  -1  -5  -1  716.63   11.03
   1   5   2  964.00   15.82
  -1  -5  -2  983.31   14.56
  -1   5  -2  960.31   15.35
   1  -5   2  940.28   15.83
  -1   5  -3  689.67   12.05
   1  -5   3  668.73   12.30
   1  -5   3  670.61   11.12
  -1  -5  -3  666.14   12.20
   1   5   4  368.64    8.19
  -1  -5  -4  353.13    8.00
  -1   5  -4  355.79    7.98
   1  -5   4  342.51    7.93
  -1   5  -5    9.31    1.26
   1  -5   5    8.41    1.18
  -1  -5  -5   10.10    1.28
   1   5   5    7.00    1.12
   1  -5   5   10.40    1.06
   1  -5   6  130.78    4.97
   1  -5   6  139.78    5.70
   1  -5   6  136.48    4.89
  -1   5  -6  136.97    5.43
   1  -5   6  137.82    5.40
  -1  -5  -6  135.76    5.21
   1   5   6  145.49    5.61
   1   5   6  147.16    5.52
   1   5   6  143.48    5.60
   1   5   6  132.93    5.48
  -1   5  -7   -1.24    1.02
   1   5   7    0.98    0.79
   1  -5   7    0.82    0.79
   1   5   7    0.84    0.84
   1   5   7    1.39    0.98
   1   5   7   -0.28    0.77
  -1  -5  -7    2.41    1.13
   1  -5   8    1.35    0.89
   1   5   8    2.05    0.99
   1   5   8    1.58    0.91
   1   5   8    1.22    1.04
   1   5   9    5.88    1.26
   1   5   9    7.80    1.33
   1  -5   9    7.94    1.24
   1  -5   9    5.97    1.31
   1   5   9    6.03    1.20
   1   5  10    9.01    1.15
   1  -5  10    8.62    1.19
   1   5  10    9.45    1.14
   1  -5  10    8.98    1.19
  -1  -6  10   63.37    2.94
  -1   6  10   64.83    3.28
  -1  -6  10   64.78    3.26
  -1  -6   9   14.52    1.75
  -1   6   9   19.72    2.23
  -1   6   8   12.13    2.03
  -1  -6   8   12.76    1.90
  -1  -6   8   13.46    1.82
  -1  -6   7   11.19    1.54
  -1  -6   7    7.81    1.48
  -1   6   7   10.75    1.82
  -1  -6   7    9.74    1.66
  -1  -6   6    1.98    0.85
  -1   6   6    1.63    0.84
  -1  -6   6    0.95    0.51
  -1   6   6    2.37    0.98
   1  -6  -6    2.11    0.77
  -1  -6   6    1.60    0.68
  -1  -6   5    5.93    0.97
  -1   6   5    6.60    0.93
  -1   6   5    6.51    1.10
  -1  -6   5    9.14    1.07
   1  -6  -5    5.59    0.89
  -1   6   4  922.39   16.50
  -1   6   4  917.83   15.39
  -1  -6   4  905.09   15.86
  -1  -6   4  912.69   15.62
  -1  -6   3  103.54    3.35
   1  -6  -3  100.76    2.69
  -1  -6   3  100.68    3.17
  -1   6   3   96.39    2.98
  -1   6   3   96.19    3.43
  -1   6   2 1034.03   16.22
  -1  -6   2  995.84   16.14
  -1   6   2 1009.30   16.75
  -1   6   2 1035.77   16.38
   1  -6  -2 1004.21   15.28
  -1  -6   1 2719.21   40.70
   1   6  -1 2800.59   39.45
  -1   6   1 2728.97   40.59
  -1  -6   1 2730.88   40.38
  -1  -6   0   12.62    0.86
   1   6   0   13.65    0.67
   1   6   1  717.53   12.29
  -1  -6  -1  733.59   11.49
  -1   6  -1  735.33   11.08
   1  -6   1  723.64   12.31
  -1   6  -1  713.91   11.41
   1  -6   2  617.97   10.76
  -1   6  -2  613.07   10.10
  -1  -6  -2  612.56    9.25
   1   6   2  615.71   10.65
   1  -6   3    1.60    0.40
   1  -6   3    1.65    0.58
  -1   6  -3    1.60    0.55
   1   6   3    1.34    0.65
  -1  -6  -3    1.30    0.55
   1  -6   4  518.34   10.96
   1  -6   4  554.19    9.56
   1   6   4  563.85   11.26
  -1   6  -4  532.09   10.86
  -1  -6  -4  534.77   10.95
  -1  -6  -5   14.43    1.53
   1   6   5   13.43    1.52
   1  -6   5   16.11    1.59
  -1   6  -5   12.64    1.48
   1  -6   5   16.82    1.39
  -1   6  -6   47.88    3.12
   1   6   6   46.83    3.15
   1  -6   6   55.26    3.06
   1  -6   6   46.89    3.13
   1   6   6   45.67    3.21
   1  -6   6   46.67    2.89
   1  -6   6   42.02    3.11
   1   6   6   46.26    3.11
   1  -6   6   44.90    2.71
  -1  -6  -6   47.41    3.01
   1   6   6   47.19    3.11
   1   6   7  158.39    6.33
  -1  -6  -7  154.67    6.06
  -1   6  -7  162.91    6.48
   1   6   7  159.11    6.32
   1  -6   7  163.10    6.39
   1   6   7  168.16    6.49
   1   6   7  167.26    6.54
   1   6   8   29.20    2.69
   1   6   8   30.57    2.68
   1  -6   8   31.49    2.76
   1   6   8   30.40    2.69
   1  -6   9   21.09    2.11
   1   6   9   19.57    1.95
   1  -6   9   20.99    1.96
   1   6   9   21.79    2.10
   1   6   9   21.45    2.02
   1  -6  10    1.12    0.64
   1   6  10    2.61    0.72
   1   6  10    1.65    0.61
   1  -6  10    1.00    0.60
  -1  -7  10    3.62    0.83
  -1   7  10    5.31    1.04
  -1  -7  10    4.17    0.86
  -1  -7   9   48.99    3.10
  -1   7   9   46.56    3.26
  -1  -7   8   90.44    4.85
  -1   7   8   77.50    4.57
  -1  -7   8   86.98    4.48
  -1  -7   7   86.10    4.71
  -1  -7   7   91.16    4.46
  -1   7   7   88.27    4.83
  -1  -7   6    1.27    0.50
  -1  -7   6   -0.22    0.80
  -1   7   6    0.11    0.76
  -1   7   6    1.11    0.90
  -1  -7   6    0.50    0.69
  -1  -7   6    0.57    0.68
  -1  -7   6    0.90    0.67
  -1  -7   6    0.64    0.69
  -1  -7   5   34.41    2.12
  -1  -7   5   30.77    2.12
  -1   7   5   32.07    2.03
  -1   7   5   30.41    2.30
   1  -7  -5   31.85    1.91
  -1   7   4  282.93    7.46
  -1  -7   4  295.57    6.98
   1  -7  -4  311.97    6.41
  -1   7   4  295.15    6.82
  -1  -7   4  302.63    7.26
  -1  -7   3   91.45    3.14
  -1   7   3   91.40    3.43
  -1  -7   3   92.95    2.98
  -1   7   3   91.06    3.05
   1  -7  -3   90.22    2.55
  -1  -7   2  532.08    9.70
   1  -7  -2  548.92    8.76
  -1   7   2  532.51   10.19
  -1   7   2  551.70    9.81
  -1   7   2  541.06    9.86
  -1  -7   1   28.99    1.55
  -1  -7   1   29.42    1.45
  -1  -7   1   32.03    1.50
  -1   7   1   31.82    1.50
  -1   7   1   30.95    1.53
   1   7  -1   33.21    1.14
   1   7   0 2967.17   44.29
  -1   7   0 2946.29   43.84
  -1  -7   0 3015.44   43.95
  -1   7   0 3013.73   43.65
   1   7   0 3027.77   43.17
  -1   7  -1   11.34    0.64
  -1  -7  -1   11.84    0.79
   1   7   1   10.21    0.95
   1  -7   1   11.35    0.98
  -1   7  -2    2.31    0.46
  -1  -7  -2    3.31    0.40
   1  -7   2    3.27    0.69
   1   7   2    1.70    0.54
   1   7   3  198.51    5.44
  -1   7  -3  201.32    5.14
   1  -7   3  211.11    5.64
   1  -7   3  214.22    4.82
  -1   7  -4   78.93    3.27
  -1  -7  -4   78.20    3.30
   1  -7   4   74.60    3.35
   1  -7   4   83.11    2.69
   1   7   4   76.87    3.39
  -1   7  -5   -0.08    0.70
   1  -7   5   -0.17    0.47
   1   7   5    0.09    0.55
   1  -7   5    0.52    0.47
   1  -7   6   73.83    4.03
   1  -7   6   77.52    3.83
   1  -7   6   75.22    4.19
  -1  -7  -6   78.51    3.89
   1   7   6   79.07    4.12
   1  -7   6   73.12    3.56
  -1   7  -6   76.36    4.02
   1   7   6   73.02    3.99
   1  -7   6   75.94    3.71
   1   7   6   73.13    3.99
   1   7   6   79.50    4.25
   1   7   7  668.38   15.53
   1   7   7  677.85   15.42
   1   7   7  674.93   15.42
   1  -7   7  702.37   15.66
  -1  -7  -7  694.74   15.22
   1  -7   8  147.49    6.02
   1   7   8  154.43    6.15
   1   7   8  151.08    6.00
   1   7   8  145.52    5.97
   1  -7   9  167.96    6.00
   1  -7   9  169.69    5.63
   1   7   9  159.19    5.67
   1   7   9  167.39    5.83
   1  -7  10    1.29    0.64
   1  -7  10    0.87    0.54
  -1   7 -10    0.94    0.47
   1   7  10    1.53    0.59
  -1  -8  10    2.69    0.80
  -1   8  10    1.86    0.77
  -1  -8  10    3.51    0.82
  -1  -8   9  297.89    8.35
  -1   8   9  300.43    8.80
  -1   8   8   24.72    2.58
  -1  -8   8   26.00    2.42
  -1  -8   8   27.12    2.68
  -1   8   7    7.68    1.55
  -1  -8   7    9.92    1.63
  -1  -8   7    6.36    1.16
  -1  -8   7    9.28    1.69
  -1  -8   6   94.65    4.10
  -1  -8   6  100.51    4.64
  -1  -8   6   98.88    4.23
  -1  -8   6  100.71    4.12
  -1   8   6   92.77    4.80
  -1  -8   6   95.27    4.27
  -1  -8   6   90.95    4.64
  -1  -8   6  100.16    4.59
  -1  -8   5    9.44    1.25
  -1   8   5    7.40    1.27
  -1   8   5    8.33    1.13
  -1  -8   5    8.22    1.16
  -1   8   4 1422.73   24.83
  -1  -8   4 1442.03   24.45
  -1   8   4 1411.93   23.78
  -1  -8   4 1412.83   23.95
  -1   8   3  210.38    5.76
  -1   8   3  211.67    5.30
  -1  -8   3  202.13    5.08
   1  -8  -3  212.12    4.48
  -1  -8   3  208.19    5.64
  -1   8   2   16.17    1.25
  -1   8   2   16.28    1.32
  -1  -8   2   16.85    1.21
  -1  -8   2   16.33    1.32
  -1   8   2   17.50    1.26
   1  -8  -2   16.79    0.85
  -1  -8   1   24.06    1.47
   1   8  -1   25.29    1.06
  -1  -8   1   22.00    1.34
  -1   8   1   25.41    1.45
  -1   8   1   23.14    1.35
  -1  -8   1   25.14    1.39
  -1  -8   0  279.85    5.92
   1   8   0  296.75    5.37
  -1   8   0  291.68    5.95
  -1   8   0  286.65    5.72
   1   8   0  297.36    6.36
   1  -8   0  291.28    6.12
  -1   8  -1   43.89    1.41
  -1  -8  -1   44.87    1.67
   1   8   1   47.39    2.19
   1  -8   1   43.33    2.04
   1  -8   2   11.64    1.18
  -1  -8  -2   15.49    0.85
   1   8   2   12.77    1.23
  -1   8  -3    0.36    0.40
   1   8   3    0.00    0.49
  -1  -8  -4   79.74    3.40
   1   8   4   80.67    3.57
  -1   8  -4   79.56    3.37
   1  -8   4   77.34    3.54
   1  -8   4   78.75    2.79
  -1   8  -5   46.94    2.83
  -1  -8  -5   40.02    2.54
   1   8   5   49.05    3.03
   1  -8   5   42.95    2.46
   1  -8   5   44.41    2.83
   1  -8   6    2.91    1.00
   1   8   6    0.85    0.86
   1  -8   6    1.25    0.75
   1   8   6    3.33    1.27
   1   8   6    1.58    1.04
  -1   8  -6    0.63    0.89
   1  -8   6    1.35    0.93
  -1  -8  -6    1.73    0.90
   1   8   6    4.08    1.18
   1  -8   6    1.21    0.93
   1   8   7   25.11    2.53
   1  -8   7   26.82    2.60
   1   8   7   24.46    2.41
   1   8   7   23.79    2.40
   1  -8   7   29.77    2.37
   1   8   8  355.79   10.02
   1  -8   8  366.83   10.15
   1   8   8  357.47    9.93
   1   8   8  355.05    9.72
   1  -8   9   28.85    2.16
   1   8   9   24.31    2.09
   1   8   9   23.56    2.04
   1  -8   9   25.92    2.24
   1   8  10  111.67    3.46
   1  -8  10  110.12    3.85
   1  -8  10  119.35    4.08
  -1   9  10  239.74    6.32
  -1  -9  10  235.44    6.26
  -1  -9  10  238.70    5.98
  -1   9   9  411.69   10.75
  -1  -9   9  448.15   10.54
  -1  -9   8  106.06    5.27
  -1  -9   8  108.09    4.88
  -1   9   8  106.40    5.27
  -1   9   7    1.57    1.01
  -1  -9   7    2.28    0.85
  -1  -9   7    1.53    1.01
  -1  -9   7    0.56    0.80
  -1  -9   6   81.29    4.21
  -1  -9   6   83.09    4.49
  -1   9   6   81.15    4.48
  -1  -9   6   81.49    3.98
  -1  -9   6   86.32    4.14
  -1  -9   6   83.09    3.86
  -1  -9   6   89.91    4.40
  -1  -9   6   80.21    3.82
  -1  -9   5   44.85    2.63
  -1   9   5   40.98    2.87
  -1   9   5   50.53    2.74
  -1  -9   5   43.92    2.73
  -1  -9   4   39.73    2.49
  -1  -9   4   37.39    2.27
  -1   9   4   37.92    2.23
  -1   9   4   36.73    2.48
  -1  -9   3   28.99    1.99
  -1  -9   3   29.37    1.75
  -1   9   3   29.83    2.00
  -1   9   3   30.61    1.84
  -1  -9   2  118.75    3.61
  -1   9   2  111.65    3.81
  -1   9   2  118.09    3.66
  -1  -9   2  122.33    3.96
   1  -9  -2  117.45    2.78
   1   9  -1   98.32    2.54
  -1  -9   1   98.27    3.09
  -1   9   1  101.72    3.22
  -1   9   1   98.81    3.12
   1  -9  -1   95.63    2.94
  -1  -9   1   96.14    3.27
  -1  -9   1   99.52    3.13
  -1   9   0  348.06    6.86
  -1  -9   0  343.60    7.12
   1  -9   0  350.04    7.31
  -1   9   0  358.14    7.15
   1   9   0  353.87    6.51
  -1   9  -1   83.35    2.16
  -1  -9  -1   86.79    2.58
   1   9   1   83.19    3.13
   1  -9   1   80.34    3.02
   1  -9   2  348.03    7.86
  -1  -9  -2  340.38    6.22
   1   9   2  338.57    7.77
   1   9   3 1318.27   22.40
   1  -9   3 1329.99   22.58
   1  -9   3 1284.17   21.25
  -1   9  -4  261.56    6.95
  -1  -9  -4  262.97    6.97
   1  -9   4  266.12    7.44
   1  -9   4  267.34    6.23
   1   9   4  272.96    7.49
   1  -9   5   13.23    1.59
   1  -9   5   12.83    1.59
   1   9   5   14.47    1.79
   1  -9   5   14.95    1.86
   1   9   5   14.31    1.71
   1  -9   5   12.67    1.48
  -1  -9  -5   15.71    1.64
   1  -9   5   15.36    1.63
  -1   9  -5   13.76    1.61
   1   9   6  380.64   10.45
   1  -9   6  403.68    9.86
   1   9   6  392.24   10.74
   1  -9   6  397.07   10.68
   1  -9   6  394.53   10.13
  -1  -9  -6  395.04   10.10
   1  -9   6  382.93   10.70
   1   9   6  389.14   10.36
   1   9   6  402.35   10.79
   1  -9   7  198.15    6.51
   1   9   7  188.98    6.93
   1  -9   7  185.28    6.17
   1   9   7  181.99    6.68
   1   9   7  177.63    6.90
   1   9   8   64.83    3.84
   1  -9   8   75.06    4.16
   1   9   8   65.80    3.77
   1   9   9   37.83    2.43
   1  -9   9   37.57    2.62
   1  -9   9   41.85    2.50
   1   9   9   40.99    2.60
   1  -9  10    7.89    1.02
   1  -9  10   10.71    1.14
  -1 -10  10   14.74    1.37
  -1 -10  10   13.59    1.24
  -1  10  10   17.29    1.48
  -1  10   9   81.24    4.01
  -1 -10   9   72.53    3.64
  -1  10   8   -0.71    0.98
  -1 -10   8    0.32    0.68
  -1 -10   8   -0.17    0.79
  -1  10   7   59.39    4.00
  -1 -10   7   58.44    3.32
  -1 -10   7   63.79    4.09
  -1 -10   7   65.04    3.93
  -1 -10   6   15.93    1.82
  -1 -10   6   17.36    2.06
  -1 -10   6   17.80    1.97
  -1 -10   6   15.74    1.76
  -1 -10   6   17.51    1.97
  -1  10   6   15.56    2.03
  -1 -10   6   17.20    2.04
  -1 -10   6   18.37    1.89
  -1  10   5    4.34    0.86
  -1 -10   5    6.14    1.09
  -1 -10   5    5.29    1.10
  -1 -10   5    4.49    1.05
  -1 -10   5    3.45    0.85
  -1 -10   5    4.98    1.12
  -1  10   5    5.38    1.19
  -1 -10   5    4.94    1.06
  -1  10   4   17.89    1.78
  -1 -10   4   19.52    1.70
  -1  10   4   20.27    1.69
  -1 -10   4   18.28    1.80
  -1  10   3  902.25   16.24
  -1 -10   3  927.69   16.94
  -1 -10   3  918.86   15.97
  -1  10   3  878.79   16.78
  -1 -10   2  167.96    5.03
  -1  10   2  171.46    4.78
   1 -10  -2  177.94    4.25
  -1  10   2  164.77    4.94
  -1 -10   2  165.31    4.66
   1  10  -2  176.86    3.97
   1  10  -1 1557.72   23.05
  -1 -10   1 1496.81   24.52
  -1  10   1 1527.30   24.17
  -1 -10   1 1521.10   24.23
   1 -10  -1 1494.44   23.87
  -1  10   1 1482.42   24.18
   1  10   0  365.61    6.71
  -1  10   0  340.64    6.93
  -1  10   0  365.28    7.38
  -1 -10   0  347.63    7.36
   1 -10   0  352.51    7.54
   1 -10   1    0.84    0.46
  -1 -10  -1    0.89    0.39
  -1  10  -1    1.30    0.48
   1  10   1    0.32    0.44
   1  10   2    2.13    0.65
   1 -10   2    3.14    0.77
   1 -10   3   35.30    2.00
   1  10   3   36.92    2.39
   1 -10   3   33.69    2.30
   1  10   4    1.88    0.81
  -1 -10  -4    3.07    0.81
   1 -10   4    2.00    0.75
   1 -10   4    3.79    0.73
   1  10   5   23.43    2.23
   1 -10   5   23.51    2.23
   1  10   5   25.70    2.28
   1 -10   5   24.90    2.12
   1 -10   5   21.35    2.13
   1 -10   5   24.53    2.29
   1 -10   5   25.10    2.07
   1  10   5   22.62    2.16
   1 -10   5   23.21    2.07
   1  10   5   25.28    2.29
  -1 -10  -5   27.74    2.20
   1 -10   6    0.87    0.89
   1 -10   6    0.28    0.72
   1 -10   6   -0.42    0.84
   1  10   6    2.19    1.10
  -1 -10  -6    1.15    0.94
   1  10   6    0.62    0.78
   1  10   6   -0.33    0.94
   1  10   6   -0.21    0.74
   1  10   7   23.33    2.32
   1  10   7   23.57    2.44
   1 -10   7   22.56    2.14
   1 -10   7   27.78    2.42
   1 -10   7   22.02    2.03
   1 -10   8    7.28    1.46
   1  10   8    5.80    1.25
   1  10   8    3.31    0.94
   1 -10   9    3.66    0.96
  -1  10  -9    5.83    0.92
   1  10   9    2.79    0.84
   1 -10  10    5.38    0.83
   1 -10  10    7.58    0.92
  -1  11  10   82.99    3.04
  -1 -11  10   84.88    2.92
  -1 -11  10   76.88    2.91
  -1 -11   9    1.30    0.76
  -1  11   9    0.30    0.67
  -1 -11   8    4.37    1.22
  -1 -11   8    5.20    1.14
  -1  11   8    5.64    1.39
  -1  11   7   48.36    3.55
  -1 -11   7   50.69    3.61
  -1 -11   7   42.93    3.20
  -1 -11   7   46.54    2.98
  -1 -11   6    0.44    0.77
  -1 -11   6    0.54    0.69
  -1 -11   6    1.23    0.80
  -1 -11   6   -0.40    0.60
  -1 -11   6    0.34    0.74
  -1 -11   6    0.73    0.72
  -1 -11   6    0.29    0.74
  -1  11   6   -0.12    0.81
  -1 -11   5    0.61    0.52
  -1  11   5    0.80    0.56
  -1 -11   5    0.66    0.74
  -1 -11   5    1.19    0.83
  -1 -11   5    1.16    0.80
  -1 -11   5    0.34    0.61
  -1 -11   5    0.27    0.66
  -1 -11   4    1.52    0.75
  -1  11   4    0.93    0.63
  -1  11   4    4.42    1.01
  -1 -11   4    3.16    0.89
  -1 -11   3  212.65    5.72
  -1  11   3  212.98    6.02
  -1 -11   3  211.35    6.35
  -1  11   3  205.65    6.23
  -1  11   2  685.29   12.96
  -1 -11   2  692.29   12.96
  -1 -11   2  700.71   13.54
   1  11  -2  696.61   11.77
  -1  11   2  681.53   13.27
   1  11  -1  194.06    4.36
  -1  11   1  191.01    5.09
  -1  11   1  186.98    5.05
   1 -11  -1  192.87    4.89
  -1 -11   1  189.17    5.31
  -1 -11   1  187.51    5.12
  -1 -11   0  563.02   10.75
   1  11   0  570.50    9.96
  -1  11   0  568.15   10.23
   1 -11   0  563.39   10.89
  -1  11   0  554.57   10.65
  -1 -11   0  559.65   10.69
   1 -11   1   75.43    3.15
  -1  11  -1   70.11    2.76
   1  11   1   73.11    3.19
  -1 -11  -1   70.73    2.54
   1  11   2   80.60    3.52
   1 -11   2   74.74    3.40
   1 -11   3  443.39    9.52
   1 -11   3  451.62   10.52
   1  11   3  459.50   10.55
  -1 -11  -4  441.50   10.12
   1 -11   4  433.51   10.79
   1 -11   4  446.87    9.53
   1  11   4  449.43   10.95
   1  11   5    6.75    1.43
   1 -11   5    8.81    1.40
   1 -11   5    4.56    1.11
   1  11   5    6.40    1.28
   1 -11   5    6.49    1.17
   1 -11   5    8.20    1.40
  -1 -11  -5    6.75    1.21
   1  11   5    7.58    1.40
   1 -11   5    6.27    1.42
   1 -11   5    6.78    1.29
   1 -11   6  252.63    7.64
   1  11   6  258.56    8.24
   1  11   6  264.20    8.66
   1 -11   6  263.97    8.49
   1 -11   6  257.84    8.43
   1 -11   6  266.02    8.06
   1  11   6  252.16    8.36
   1  11   7   22.59    2.30
   1 -11   7   24.27    2.28
   1  11   7   20.73    2.25
   1 -11   7   22.39    2.04
   1 -11   7   26.40    2.30
   1 -11   8    0.79    0.87
   1 -11   8   -0.40    0.61
   1  11   8    0.61    0.84
   1  11   9   79.52    3.42
  -1  11  -9   79.23    2.96
   1 -11   9   81.15    3.65
   1 -11  10   78.59    2.72
  -1  12  10   14.99    1.18
  -1  12   9  191.37    6.12
  -1 -12   9  205.22    6.05
  -1 -12   8   53.79    3.55
  -1  12   8   52.46    3.45
  -1 -12   8   55.74    3.38
  -1  12   7    0.27    0.79
  -1 -12   7   -0.04    0.91
  -1 -12   7   -0.01    0.76
  -1 -12   7    0.91    0.85
  -1 -12   6    4.50    1.12
  -1 -12   6    6.12    1.37
  -1 -12   6    5.55    1.23
  -1 -12   6    8.15    1.32
  -1 -12   6    3.86    0.95
  -1 -12   6    3.44    0.97
  -1 -12   6    4.99    1.20
  -1  12   6    5.24    1.28
  -1 -12   6    7.52    1.46
  -1  12   5  202.16    7.27
  -1 -12   5  208.91    7.13
  -1 -12   5  216.25    7.41
  -1 -12   5  216.40    7.13
  -1 -12   5  212.31    6.82
  -1 -12   5  213.26    6.67
  -1 -12   5  199.80    6.69
  -1 -12   4  280.35    7.89
  -1  12   4  308.30    8.09
  -1  12   4  285.36    8.41
  -1 -12   4  302.93    8.53
  -1 -12   4  300.27    8.22
  -1 -12   3   70.00    3.53
  -1  12   3   59.70    3.18
  -1 -12   3   62.58    2.94
  -1  12   2   90.68    3.68
  -1 -12   2   96.00    3.94
  -1 -12   2   93.56    3.61
  -1  12   2   94.42    3.62
  -1  12   1   17.42    1.42
  -1 -12   1   19.63    1.57
  -1 -12   1   18.80    1.59
   1 -12  -1   19.16    1.41
   1  12  -1   21.10    1.26
  -1  12   1   18.83    1.52
  -1  12   0   15.76    1.17
  -1 -12   0   16.26    1.42
   1  12   0   18.30    1.22
  -1 -12   0   15.91    1.35
   1 -12   0   15.02    1.36
  -1  12   0   17.34    1.40
   1 -12   1   53.61    2.77
   1  12   1   60.07    3.04
  -1 -12  -1   54.22    2.30
  -1  12  -1   55.85    2.57
   1 -12   2  488.38   11.03
   1  12   2  504.77   11.10
   1 -12   3  112.29    4.13
   1 -12   3  119.08    4.79
   1  12   3  108.24    4.61
  -1 -12  -4    0.72    0.57
   1 -12   4    0.98    0.53
   1  12   4    0.87    0.62
   1 -12   4    0.84    0.83
   1 -12   4    0.06    0.62
   1  12   4    1.35    0.94
   1 -12   4    0.69    0.69
   1 -12   4    1.21    0.76
   1  12   5   57.85    3.54
   1 -12   5   52.93    3.21
   1  12   5   58.19    3.72
   1 -12   5   59.87    3.60
   1  12   5   59.57    3.71
   1 -12   5   61.55    3.38
   1 -12   5   58.34    3.64
   1 -12   5   62.09    3.55
   1 -12   6  219.16    7.04
   1 -12   6  224.96    7.39
   1  12   6  219.04    7.47
   1 -12   6  216.02    7.61
   1  12   6  217.06    7.64
   1 -12   6  225.19    7.81
   1 -12   7    8.79    1.41
   1 -12   7    6.47    1.25
   1 -12   7    7.41    1.26
   1  12   7    7.96    1.54
  -1  12  -8    8.00    1.12
   1  12   8    7.76    1.31
   1 -12   8    7.74    1.19
   1 -12   8    9.06    1.49
   1 -12   9   14.76    1.50
   1  12   9   14.37    1.37
  -1 -13   9   36.56    2.29
  -1  13   9   32.16    2.24
  -1  13   8   56.18    3.47
  -1 -13   8   59.10    3.60
  -1 -13   8   54.07    3.32
  -1 -13   7   64.21    4.02
  -1  13   7   62.87    3.98
  -1 -13   7   66.04    3.60
  -1 -13   7   64.27    3.92
  -1 -13   6    1.81    0.79
  -1 -13   6    0.94    0.66
  -1 -13   6    1.49    0.89
  -1 -13   6    1.05    0.78
  -1 -13   6    0.97    0.81
  -1 -13   6    0.92    0.68
  -1  13   6    2.36    1.15
  -1  13   5    6.67    1.50
  -1 -13   5    5.77    1.25
  -1 -13   5    7.60    1.55
  -1 -13   5    5.41    1.26
  -1 -13   5    8.38    1.38
  -1 -13   5    7.00    1.30
  -1 -13   5    6.52    1.36
  -1  13   4    0.19    0.74
  -1 -13   4   -0.12    0.74
  -1 -13   4    0.28    0.73
  -1 -13   4    0.23    0.59
  -1 -13   4    1.64    0.67
  -1 -13   3   23.15    1.87
  -1  13   3   26.69    2.20
  -1 -13   3   25.50    2.24
  -1  13   2  359.12    8.45
  -1 -13   2  347.53    8.82
  -1 -13   2  356.98    8.44
  -1  13   2  338.53    8.44
  -1 -13   1 1422.39   24.09
  -1  13   1 1393.74   23.42
  -1  13   1 1404.99   23.63
  -1 -13   1 1423.56   23.88
   1 -13  -1 1428.09   23.26
  -1 -13   0  110.16    3.92
   1 -13   0  106.87    3.91
   1  13   0  101.55    3.19
  -1 -13   0   97.24    3.63
  -1  13   0   92.43    3.58
  -1 -13  -1  213.75    5.79
  -1  13  -1  215.88    5.85
   1 -13   1  214.86    6.30
  -1 -13  -1  215.44    5.39
  -1  13  -2   14.99    1.42
   1 -13   2   16.72    1.73
   1  13   2   18.37    1.83
   1 -13   3  250.90    6.92
   1 -13   3  241.37    7.55
   1  13   3  253.11    7.63
   1  13   4    1.65    0.73
   1 -13   4    1.08    0.84
   1 -13   4    3.63    1.07
   1 -13   4    0.34    0.53
   1 -13   4    0.76    0.60
   1  13   4    0.64    0.67
  -1  13  -4    0.77    0.63
   1 -13   4    1.17    0.78
   1  13   4    0.80    0.90
   1 -13   5   69.46    3.85
   1  13   5   76.65    4.34
   1  13   5   78.16    4.32
   1 -13   5   78.40    4.29
   1 -13   5   78.86    3.97
   1 -13   5   76.15    4.11
  -1  13  -5   75.11    3.82
   1 -13   6  354.17   10.17
   1  13   6  358.56   10.33
   1 -13   6  359.40   10.44
  -1  13  -6  373.07    9.57
   1 -13   6  372.72    9.70
   1 -13   6  363.37   10.00
   1  13   7    7.12    1.41
  -1  13  -7    5.71    1.09
   1 -13   7    8.88    1.44
   1 -13   7    7.93    1.37
   1 -13   7    8.33    1.33
   1  13   8   85.25    3.99
   1 -13   8   86.84    4.08
  -1  13  -8   83.44    3.45
   1 -13   8   89.98    3.72
   1  13   9    0.51    0.50
   1 -13   9    0.52    0.48
  -1  14   9   44.81    2.43
  -1 -14   9   45.48    2.42
  -1 -14   8   57.91    3.32
  -1 -14   8   65.44    3.64
  -1  14   8   63.12    3.53
  -1  14   7   27.28    2.62
  -1 -14   7   25.80    2.23
  -1 -14   7   24.60    2.41
  -1 -14   7   28.56    2.66
  -1 -14   6    5.72    1.30
  -1 -14   6    7.64    1.47
  -1 -14   6    9.13    1.62
  -1 -14   6    7.00    1.43
  -1 -14   6    5.35    1.08
  -1 -14   6    7.39    1.30
  -1  14   6    5.65    1.33
  -1 -14   5   35.17    2.95
  -1  14   5   38.77    3.11
  -1 -14   5   36.94    2.88
  -1 -14   5   41.62    2.94
  -1 -14   5   40.32    2.91
  -1 -14   5   37.63    3.00
  -1 -14   4  220.28    7.50
  -1 -14   4  230.25    7.51
  -1 -14   4  225.79    6.77
  -1  14   4  228.69    6.42
  -1 -14   4  237.89    7.42
  -1 -14   4  224.56    7.19
  -1  14   4  216.06    7.38
  -1  14   3    1.24    0.64
  -1 -14   3    2.61    0.84
  -1  14   3    2.50    0.97
  -1 -14   3    2.18    0.95
  -1 -14   2   29.84    2.16
  -1  14   2   30.14    2.17
  -1 -14   2   32.64    2.45
  -1 -14   1   11.95    1.43
  -1 -14   1   10.36    1.30
  -1 -14   0   42.52    2.40
  -1 -14   0   41.48    2.45
  -1  14   0   36.33    2.27
   1 -14   0   37.55    2.33
   1 -14   1  286.98    7.67
  -1 -14  -1  270.47    7.03
  -1  14  -1  265.43    6.97
  -1  14  -2   63.58    3.07
  -1 -14  -2   63.51    2.95
   1  14   2   64.70    3.58
   1 -14   2   56.57    3.31
   1 -14   3   -0.27    0.68
   1 -14   3   -0.01    0.55
   1  14   3   -0.01    0.62
  -1  14  -3    0.43    0.53
   1  14   3    0.29    0.51
   1 -14   3   -0.08    0.45
  -1  14  -3    0.08    0.70
   1  14   3    0.60    0.72
   1  14   4   71.38    4.00
   1  14   4   64.78    3.90
   1 -14   4   66.27    4.00
   1  14   4   70.17    3.50
   1 -14   4   66.78    3.38
   1 -14   4   69.13    3.58
  -1  14  -4   65.09    3.55
   1 -14   4   62.24    3.68
   1 -14   4   67.44    3.51
   1 -14   5  635.99   14.30
   1  14   5  623.90   14.61
   1 -14   5  637.11   14.68
   1 -14   5  603.05   14.10
   1 -14   5  634.23   13.90
   1 -14   5  628.13   14.18
  -1  14  -5  640.31   13.85
  -1  14  -6    0.54    0.77
   1  14   6    0.33    0.75
   1 -14   6    1.90    1.05
   1 -14   6    1.71    0.98
   1 -14   6    0.75    0.89
   1 -14   6    0.63    0.84
   1 -14   7    4.33    1.13
   1  14   7    3.89    1.17
   1 -14   7    3.68    0.99
   1 -14   7    3.91    0.99
  -1  14  -7    5.59    1.05
  -1  14  -8    0.70    0.51
   1  14   8    1.93    0.80
   1 -14   8    1.44    0.62
   1 -14   8    1.53    0.73
   1  14   9    4.47    0.74
   1 -14   9    4.72    0.89
  -1 -15   9    2.97    0.74
  -1  15   9    4.55    0.81
  -1 -15   8   34.30    2.07
  -1 -15   8   36.45    2.58
  -1 -15   8   34.94    2.48
  -1  15   8   39.11    2.61
  -1  15   7   18.91    2.11
  -1 -15   7   17.38    2.02
  -1 -15   7   18.14    1.90
  -1 -15   7   20.37    2.20
  -1  15   6  275.19    8.78
  -1 -15   6  276.79    8.59
  -1 -15   6  277.73    8.86
  -1 -15   6  259.97    8.62
  -1 -15   6  290.12    7.85
  -1 -15   6  265.58    8.15
  -1 -15   6  270.77    8.25
  -1 -15   5   13.66    1.87
  -1  15   5   16.18    2.04
  -1 -15   5   12.32    1.72
  -1 -15   5   15.05    1.81
  -1 -15   4   65.25    3.70
  -1 -15   4   68.36    3.79
  -1  15   4   59.03    3.68
  -1 -15   4   60.94    3.65
  -1  15   4   59.25    3.05
  -1 -15   4   58.35    3.78
  -1 -15   4   59.28    3.26
  -1 -15   3  591.82   13.54
  -1  15   3  588.52   12.54
  -1 -15   3  585.56   12.67
  -1  15   3  559.26   12.01
  -1 -15   3  572.17   12.98
  -1 -15   3  581.62   12.99
  -1  15   3  558.65   13.11
  -1  15   2  307.63    7.98
  -1 -15   2  293.98    8.45
  -1  15   2  286.22    8.22
  -1 -15   1    0.02    0.54
  -1 -15   1    0.87    0.64
  -1  15   0  355.20    8.65
   1 -15   0  360.38    8.73
  -1 -15   0  351.43    8.48
  -1 -15   0  359.84    8.83
   1 -15   1  108.05    4.52
  -1  15  -1  113.90    4.29
  -1 -15  -1  112.99    4.32
  -1  15  -2    3.52    0.94
   1 -15   2    4.48    1.08
  -1  15  -2    3.27    0.79
  -1 -15  -2    2.26    0.64
   1 -15   2    3.89    0.94
   1  15   2    6.07    1.04
   1  15   2    4.17    1.08
   1 -15   3  142.30    5.36
  -1  15  -3  147.77    5.49
   1  15   3  156.50    6.21
   1 -15   3  154.67    5.77
   1 -15   3  148.45    6.00
   1 -15   3  139.00    5.11
   1  15   3  145.42    5.28
  -1  15  -3  152.40    5.30
   1  15   3  153.38    5.85
   1  15   4  326.16    9.50
   1  15   4  362.48    9.02
  -1  15  -4  335.62    8.78
   1  15   4  337.14    9.99
   1 -15   4  320.28    8.65
   1 -15   4  334.16    8.86
  -1  15  -4  328.81    9.00
   1 -15   4  320.88    9.88
   1 -15   4  319.94    9.34
   1 -15   4  331.11    8.84
   1  15   5   15.77    2.01
  -1  15  -5   15.23    1.80
   1 -15   5   16.27    1.93
   1 -15   5   19.47    2.12
   1 -15   5   13.89    1.73
   1 -15   5   15.65    2.00
   1 -15   6    4.28    1.18
   1 -15   6    4.07    1.13
   1  15   6    4.32    1.32
   1 -15   6    5.17    1.39
   1 -15   6    5.94    1.31
  -1  15  -6    2.83    0.81
   1 -15   7   15.93    1.75
   1 -15   7   14.78    1.59
   1 -15   7   17.60    1.90
  -1  15  -7   20.09    1.78
   1  15   7   18.00    1.90
   1 -15   8    0.75    0.56
   1  15   8    1.53    0.68
   1 -15   8    0.53    0.58
   1 -15   9   80.68    2.86
  -1  16   9    4.93    0.71
  -1 -16   9    5.50    0.76
  -1  16   8   16.20    1.68
  -1 -16   8   14.27    1.31
  -1 -16   7   10.29    1.41
  -1 -16   7   12.60    1.67
  -1  16   7   11.96    1.70
  -1 -16   7   11.41    1.63
  -1  16   6  123.60    5.52
  -1 -16   6  129.53    5.32
  -1 -16   6  132.13    5.78
  -1 -16   6  126.08    5.53
  -1 -16   6  120.78    5.19
  -1 -16   6  130.22    4.91
  -1 -16   5    1.13    0.78
  -1 -16   5    0.54    0.83
  -1 -16   5   -0.29    0.81
  -1 -16   5    1.31    0.84
  -1  16   5   -0.47    1.14
  -1  16   4   37.79    2.96
  -1 -16   4   39.99    2.95
  -1 -16   4   34.58    2.75
  -1 -16   4   40.44    3.18
  -1 -16   4   35.60    2.84
  -1  16   3   47.62    3.21
  -1  16   3   50.83    2.92
  -1 -16   3   54.48    3.37
  -1  16   3   52.88    3.12
  -1 -16   3   45.63    2.99
  -1 -16   3   47.96    3.19
  -1 -16   3   51.36    3.45
  -1 -16   2  524.78   12.49
  -1  16   2  527.78   12.31
  -1 -16   2  533.86   12.09
  -1  16   2  532.69   11.65
  -1  16   2  535.29   11.76
  -1 -16   1    8.45    1.31
  -1  16   1    6.47    0.98
  -1  16   1    8.10    1.22
  -1  16   1    5.33    1.06
  -1 -16   1    9.91    1.42
  -1  16   1   10.29    1.46
  -1  16   0   39.16    2.62
   1  16   0   38.49    2.70
  -1 -16   0   30.56    2.18
  -1  16   0   32.89    2.30
  -1  16   0   30.67    2.30
  -1 -16   0   35.99    2.51
   1  16   1  705.93   14.85
  -1 -16  -1  681.65   14.18
  -1  16  -1  701.38   14.16
   1 -16   1  693.16   14.78
  -1  16  -1  707.99   14.70
  -1 -16  -2   84.34    3.70
   1 -16   2   78.51    3.97
   1 -16   2   78.57    4.15
  -1  16  -2   77.94    3.68
  -1  16  -2   82.62    4.00
   1  16   2   77.13    4.03
   1  16   2   82.47    3.89
   1  16   3    3.93    1.08
   1 -16   3    5.57    1.23
   1  16   3    3.49    0.98
   1 -16   3    5.00    1.20
   1 -16   3    8.21    1.32
  -1  16  -3    5.99    1.27
  -1  16  -3    4.43    1.08
   1 -16   3    6.20    1.40
   1  16   4   30.82    2.37
   1  16   4   26.29    2.52
   1 -16   4   26.59    2.47
   1 -16   4   27.49    2.30
   1 -16   4   26.12    2.38
  -1  16  -4   28.53    2.47
   1 -16   4   25.12    2.58
   1 -16   4   27.01    2.30
   1 -16   5  121.95    5.49
   1 -16   5  126.24    5.37
   1 -16   5  120.88    5.05
   1  16   5  126.05    5.57
   1 -16   5  126.97    5.22
  -1  16  -5  125.67    5.13
  -1  16  -6  536.94   11.97
   1 -16   6  529.80   12.50
   1 -16   6  527.74   12.16
   1 -16   6  531.15   12.99
   1  16   6  534.45   12.81
   1 -16   7    1.38    0.69
   1 -16   7    1.68    0.73
  -1  16  -7    2.06    0.68
   1 -16   7    1.75    0.69
   1  16   7    3.06    0.95
   1 -16   7    1.39    0.51
   1  16   8   15.12    1.41
   1 -16   8   15.69    1.49
   1 -16   8   15.22    1.36
  -1 -17   8    0.01    0.53
  -1 -17   8    0.13    0.54
  -1  17   8    0.03    0.58
  -1 -17   7    9.18    1.29
  -1 -17   7    8.87    1.12
  -1 -17   7    8.61    1.32
  -1  17   7    8.15    1.32
  -1 -17   7    6.49    1.23
  -1 -17   6    3.89    1.14
  -1 -17   6    5.13    1.23
  -1 -17   6    5.47    1.34
  -1 -17   6    4.47    1.13
  -1 -17   6    2.40    0.86
  -1  17   6    2.51    0.92
  -1 -17   5    6.79    1.45
  -1 -17   5    8.73    1.50
  -1  17   5    6.76    1.42
  -1 -17   5    5.75    1.24
  -1 -17   5    7.19    1.44
  -1  17   4   35.28    2.86
  -1 -17   4   33.07    2.68
  -1 -17   4   33.51    2.71
  -1  17   3 1527.88   27.91
  -1 -17   3 1527.74   27.48
  -1  17   3 1646.67   27.46
  -1 -17   3 1563.64   27.62
  -1  17   3 1535.67   26.55
  -1 -17   3 1540.04   27.96
  -1 -17   3 1539.71   28.60
  -1  17   2   24.90    2.28
  -1 -17   2   24.00    2.32
  -1 -17   2   23.33    2.16
  -1  17   2   23.59    2.01
  -1  17   2   23.54    2.10
  -1  17   1    2.99    0.95
  -1 -17   1    2.46    0.86
  -1 -17   1    2.30    0.86
  -1  17   1    2.49    0.80
  -1  17   1    1.92    0.81
  -1  17   1    2.07    0.79
   1  17   0   41.31    2.88
  -1  17   0   40.56    2.61
  -1  17   0   41.45    2.69
   1  17   0   39.17    2.52
  -1  17   0   42.03    2.89
  -1  17   0   43.42    2.89
  -1 -17   0   37.78    2.68
   1  17   1  312.98    8.71
  -1  17  -1  292.57    8.06
  -1 -17  -1  280.62    8.00
   1 -17   1  294.79    8.49
  -1  17  -2  180.58    6.31
   1  17   2  168.55    6.29
   1 -17   2  172.11    6.29
   1 -17   2  168.51    6.47
  -1  17  -2  173.40    5.89
   1  17   2  170.45    6.01
   1 -17   3   28.80    2.47
   1  17   3   27.48    2.32
   1 -17   3   25.41    2.53
   1 -17   3   31.31    2.36
  -1  17  -3   29.01    2.46
   1  17   3   27.59    2.52
   1 -17   3   28.56    2.47
   1 -17   4  430.05   11.21
   1 -17   4  423.34   10.52
   1  17   4  442.55   11.48
   1 -17   4  425.16   10.96
  -1  17  -4  438.69   10.92
   1 -17   5   81.49    4.02
  -1  17  -5   80.70    4.00
   1  17   5   78.86    4.32
   1 -17   5   78.31    4.14
   1 -17   5   77.20    4.26
   1 -17   5   84.39    4.18
  -1  17  -6    2.40    0.89
   1 -17   6    1.45    0.81
   1 -17   6    2.79    1.10
   1 -17   6    2.47    0.96
   1  17   6    1.54    0.85
   1 -17   7    2.00    0.79
   1 -17   7    2.55    0.68
  -1  17  -7    2.18    0.69
   1 -17   7    1.99    0.78
   1 -17   7    2.07    0.74
   1  17   7    1.65    0.71
   1 -17   8   32.24    1.93
   1  17   8   31.03    1.82
  -1  17  -8   30.33    1.57
   1 -17   8   30.54    1.76
  -1 -18   8   32.71    1.97
  -1 -18   8   32.70    1.66
  -1  18   8   34.14    1.95
  -1 -18   7   12.93    1.22
  -1 -18   7   10.14    1.29
  -1 -18   7   12.42    1.38
  -1  18   7   13.33    1.56
  -1 -18   7   11.93    1.50
  -1  18   6    8.76    1.53
  -1 -18   6    8.00    1.31
  -1 -18   6    9.96    1.61
  -1 -18   6    8.64    1.41
  -1 -18   6    9.94    1.32
  -1 -18   6   10.12    1.43
  -1  18   5   24.52    2.37
  -1 -18   5   24.07    2.22
  -1 -18   5   23.69    2.25
  -1 -18   5   19.99    2.12
  -1 -18   5   21.96    2.30
  -1  18   4   50.81    3.45
  -1 -18   4   59.17    3.56
  -1 -18   4   56.56    3.45
  -1  18   3    2.68    1.04
  -1  18   3    1.90    1.04
  -1 -18   3    4.00    1.07
  -1  18   3    1.83    0.71
  -1 -18   2   -0.47    0.72
  -1 -18   2    1.03    0.75
  -1  18   2    0.85    0.69
  -1  18   2    1.06    0.74
  -1  18   2    0.56    0.64
  -1 -18   2   -0.23    0.86
  -1 -18   1  457.33   11.25
  -1  18   1  437.54   10.76
  -1  18   1  449.21   10.71
  -1  18   1  453.22   11.09
  -1 -18   1  435.48   10.94
  -1  18   1  444.70   10.68
  -1  18   0  142.77    5.39
  -1 -18   0  147.34    5.64
  -1  18   0  148.47    5.48
  -1  18   0  140.53    5.21
   1  18   0  141.36    5.08
   1  18   1  141.74    5.64
   1 -18   1  134.55    5.60
   1  18   1  131.13    5.23
   1 -18   1  126.82    5.44
  -1 -18  -1  134.22    5.23
  -1  18  -1  131.43    5.14
  -1  18  -1  130.54    5.25
   1 -18   2   18.87    2.18
   1 -18   2   15.72    1.97
   1  18   2   18.46    1.91
   1 -18   2   18.56    2.06
   1  18   2   17.57    2.05
  -1  18  -3  530.21   12.51
   1 -18   3  541.65   11.95
   1 -18   3  528.02   12.51
   1  18   3  508.24   12.69
   1  18   3  523.38   12.19
   1  18   4  334.60    9.57
   1 -18   4  317.89    8.68
  -1  18  -4  322.58    9.02
   1 -18   4  330.72    9.41
   1 -18   4  324.00    9.15
  -1  18  -5  498.75   11.48
   1 -18   5  480.19   12.02
   1 -18   5  500.90   11.75
   1  18   5  507.16   12.18
   1 -18   5  492.66   11.84
   1 -18   5  471.32   11.30
   1 -18   6   15.60    1.75
   1 -18   6   10.41    1.47
   1 -18   6   13.44    1.61
  -1  18  -6   12.14    1.43
   1  18   6   15.53    1.74
   1 -18   6   13.39    1.71
   1 -18   7    7.05    0.91
   1 -18   7    7.57    1.11
   1 -18   7   11.08    1.30
   1  18   7    9.77    1.23
   1 -18   7    9.27    1.12
   1 -18   8    7.34    0.82
   1 -18   8    6.84    0.83
   1  18   8    9.55    0.93
  -1 -19   8    7.98    0.90
  -1  19   8    9.31    0.94
  -1 -19   7    3.09    0.79
  -1 -19   7    3.80    0.89
  -1 -19   7    4.11    0.88
  -1  19   7    5.06    0.95
  -1  19   6   54.75    3.19
  -1 -19   6   55.26    3.32
  -1 -19   6   53.24    3.01
  -1 -19   6   58.88    2.93
  -1 -19   6   54.50    3.08
  -1 -19   6   52.76    3.04
  -1 -19   5    0.25    0.64
  -1  19   5    1.84    0.79
  -1 -19   5    0.78    0.71
  -1 -19   5    1.45    0.76
  -1 -19   4  118.74    5.07
  -1 -19   4  118.69    5.03
  -1  19   4  123.86    5.34
  -1  19   3  129.35    5.47
  -1 -19   3  127.00    5.18
  -1  19   3  127.94    4.74
  -1  19   2  494.66   11.41
  -1  19   2  508.09   11.81
  -1  19   2  499.41   12.17
  -1  19   1  178.62    6.10
  -1 -19   1  188.60    6.51
  -1  19   1  180.11    6.40
  -1 -19   1  169.20    6.34
  -1  19   1  172.98    6.04
  -1 -19   0  199.65    6.84
   1  19   0  208.70    6.40
  -1  19   0  207.08    6.57
  -1  19   0  196.76    6.63
  -1  19  -1   23.33    2.05
   1  19   1   28.97    2.50
  -1  19  -1   24.45    2.27
   1  19   1   23.62    2.21
  -1 -19  -1   30.29    2.56
   1  19   2  156.66    6.09
   1  19   2  152.73    5.76
   1  19   3   17.56    1.90
   1 -19   3   16.86    1.79
   1  19   3   16.87    2.07
   1 -19   3   16.58    1.91
   1  19   4  166.22    6.22
   1 -19   4  160.82    5.97
  -1  19  -4  157.27    5.80
   1 -19   4  158.54    5.98
   1 -19   4  157.49    5.56
   1 -19   5    3.15    0.96
   1 -19   5    6.02    1.26
   1  19   5    5.37    1.26
  -1  19  -5    2.46    0.81
   1 -19   5    2.74    0.81
   1 -19   5    4.59    1.14
  -1  19  -6   20.27    1.64
   1  19   6   20.24    1.88
   1 -19   6   21.61    1.94
   1 -19   6   20.44    1.94
   1 -19   6   18.02    1.72
   1 -19   7    0.63    0.56
   1 -19   7    0.86    0.49
   1  19   7    0.88    0.51
   1 -19   7    0.23    0.49
  -1  19  -7    0.02    0.45
  -1  20   7    7.93    1.05
  -1 -20   7    7.55    1.06
  -1 -20   7    8.46    1.00
  -1 -20   7    9.31    1.07
  -1 -20   6   20.81    1.80
  -1  20   6   21.66    1.90
  -1 -20   6   18.86    1.57
  -1 -20   6   20.69    1.80
  -1 -20   6   20.29    1.70
  -1 -20   6   19.81    1.88
  -1 -20   5   37.80    2.81
  -1 -20   5   38.08    2.61
  -1 -20   5   41.77    2.80
  -1 -20   5   41.10    2.70
  -1  20   5   45.58    2.97
  -1 -20   4   57.57    3.34
  -1  20   4   58.25    3.48
  -1 -20   4   55.12    3.50
  -1 -20   4   53.54    3.21
  -1  20   3    9.65    1.32
  -1 -20   3    9.31    1.47
  -1  20   3    9.14    1.56
  -1  20   2    5.30    1.10
  -1 -20   2    3.64    1.08
  -1  20   2    6.91    1.41
  -1  20   2    6.56    1.32
  -1  20   1  150.01    5.54
  -1  20   1  148.02    5.50
   1  20  -1  146.48    5.41
  -1  20   1  149.56    5.81
  -1  20   0  445.69   10.74
   1  20   0  439.10   10.35
  -1  20   0  453.41   11.04
   1  20   1   13.05    1.69
  -1  20  -1   12.74    1.58
  -1  20  -1   13.80    1.73
   1  20   2    0.33    0.84
  -1  20  -2    0.60    0.70
   1  20   2    1.52    0.85
  -1  20  -2    0.25    0.60
   1 -20   3  117.45    4.85
   1 -20   3  115.06    4.90
   1  20   3  117.06    5.16
   1 -20   3  118.95    4.61
   1  20   3  124.78    5.00
   1  20   4   65.20    3.72
   1 -20   4   61.83    3.21
   1 -20   4   58.73    3.39
   1 -20   4   62.33    3.46
   1 -20   5  200.16    6.39
   1 -20   5  200.83    6.45
   1 -20   5  213.04    6.45
   1  20   5  204.34    6.56
   1 -20   6   42.54    2.41
   1 -20   6   42.92    2.33
   1 -20   6   40.10    2.51
   1 -20   6   43.28    2.51
   1  20   6   47.17    2.68
   1 -20   7    1.22    0.53
   1  20   7    0.92    0.49
   1 -20   7    0.92    0.43
  -1  20  -7    1.43    0.48
  -1  21   7   29.63    1.66
  -1 -21   7   30.91    1.65
  -1  21   6   84.62    3.49
  -1 -21   6   83.34    3.41
  -1 -21   6   83.81    3.38
  -1 -21   6   77.87    3.02
  -1 -21   6   84.51    3.59
  -1 -21   5    4.70    1.00
  -1 -21   5    4.72    1.00
  -1 -21   5    5.98    1.18
  -1  21   5    6.50    1.18
  -1 -21   4   42.43    2.67
  -1  21   4   41.22    2.81
  -1 -21   4   44.35    2.80
  -1 -21   4   41.16    2.86
  -1  21   3  395.95   10.14
  -1 -21   3  390.11    9.64
  -1  21   3  391.50    9.04
  -1  21   2   73.92    3.57
  -1  21   2   77.78    4.04
  -1 -21   2   74.50    3.65
  -1  21   2   76.68    3.87
  -1  21   1    6.88    1.31
  -1  21   1    7.66    1.29
   1  21  -1    9.83    1.39
   1  21   0  100.41    4.64
  -1  21   0  103.24    4.56
  -1  21   0  102.61    4.42
  -1  21  -1  101.87    4.62
   1  21   1  105.83    4.71
  -1  21  -1   99.04    4.24
  -1  21  -2   40.63    2.54
   1  21   2   39.44    2.80
   1  21   2   37.78    2.91
  -1  21  -2   37.52    2.79
  -1  21  -3   49.74    3.12
   1 -21   3   49.65    3.05
   1  21   3   53.16    3.33
   1 -21   3   51.12    2.81
   1  21   3   54.22    3.15
   1  21   4  102.77    4.50
   1 -21   4   95.00    3.85
  -1  21  -4   97.75    4.27
   1 -21   4  102.57    4.33
   1 -21   4   99.17    4.21
  -1  21  -5    1.49    0.75
   1 -21   5    1.61    0.72
   1 -21   5    1.59    0.82
   1 -21   5    2.27    0.80
   1  21   5    2.78    0.86
   1  21   6   40.27    2.25
   1 -21   6   39.05    2.14
   1 -21   6   38.27    2.04
  -1  21  -6   38.68    2.10
   1 -21   6   38.33    2.20
   1 -21   6   41.27    2.34
   1 -21   7    0.21    0.36
  -1  22   6    2.45    0.70
  -1 -22   6    2.53    0.66
  -1 -22   6    2.22    0.64
  -1 -22   6    2.32    0.56
  -1 -22   5  186.03    5.51
  -1 -22   5  185.73    5.64
  -1  22   5  190.35    5.70
  -1 -22   5  182.43    5.68
  -1 -22   5  190.35    5.46
  -1 -22   4   60.73    3.29
  -1 -22   4   59.30    2.98
  -1 -22   4   63.88    3.20
  -1  22   4   68.15    3.42
   1  22  -3    1.99    0.75
  -1 -22   3    3.70    0.93
  -1  22   3    3.70    1.13
  -1 -22   3    2.46    0.76
  -1  22   2  195.55    5.91
   1  22  -2  190.58    6.18
  -1  22   1   26.30    2.15
  -1  22   1   25.74    2.18
   1  22  -1   29.03    2.20
   1  22  -1   24.22    2.19
  -1  22   0    2.27    0.85
  -1  22   0    1.93    0.89
   1  22   0    2.83    0.98
  -1  22  -1   75.17    3.54
  -1  22  -1   74.33    3.81
   1  22   1   72.23    3.80
   1  22   2   -0.20    0.75
   1 -22   2   -0.14    0.62
  -1  22  -2   -0.11    0.73
  -1  22  -2   -0.48    0.63
   1 -22   3   84.14    3.81
  -1  22  -3   87.09    4.04
   1  22   3   88.23    4.18
   1 -22   4   29.48    2.15
   1 -22   4   30.22    2.09
   1 -22   4   27.06    2.06
   1 -22   4   30.55    1.97
  -1  22  -4   30.73    2.20
   1  22   4   32.35    2.38
   1 -22   5   18.53    1.65
   1 -22   5   20.66    1.67
   1  22   5   21.50    1.78
   1 -22   5   21.82    1.73
  -1  22  -5   17.33    1.52
   1  22   6    8.74    1.05
   1 -22   6    9.50    0.94
   1 -22   6    6.62    0.83
   1 -22   6    9.52    1.06
  -1  22  -6    8.53    0.95
   1  23  -6   19.62    1.26
  -1 -23   6   20.68    1.36
  -1 -23   6   19.82    1.30
  -1 -23   5   53.24    2.60
  -1 -23   5   58.08    2.56
   1  23  -5   55.72    2.21
  -1 -23   5   54.44    2.53
  -1 -23   5   59.88    2.73
  -1  23   5   57.01    2.68
   1  23  -5   55.94    2.57
  -1 -23   4    5.44    0.93
  -1 -23   4    4.60    0.95
   1  23  -4    4.26    0.85
  -1 -23   4    5.33    0.95
  -1  23   4    5.09    0.99
  -1 -23   3    0.12    0.61
  -1 -23   3    0.54    0.51
   1  23  -3    0.34    0.54
   1  23  -2   24.95    2.05
  -1  23   2   24.39    1.83
   1  23  -2   25.04    1.98
  -1  23   1   15.03    1.62
   1  23  -1   13.73    1.63
   1  23  -1   17.52    1.63
  -1  23   1   14.48    1.55
   1  23   0    1.23    0.75
  -1  23   0    1.30    0.68
  -1  23   0    1.72    0.71
   1  23   1    0.61    0.77
  -1  23  -1    2.10    0.87
  -1  23  -1    1.16    0.57
   1  23   2   14.33    1.59
   1 -23   2   11.96    1.35
  -1  23  -2   11.86    1.52
  -1  23  -2   13.65    1.33
   1 -23   3   16.81    1.56
  -1  23  -3   14.16    1.54
   1 -23   4    0.69    0.55
  -1  23  -4    1.23    0.68
   1 -23   4    2.02    0.66
   1 -23   4    0.71    0.61
   1 -23   5  117.82    3.93
  -1  23  -5  113.86    3.74
   1 -23   5  113.91    3.72
   1 -23   5  114.22    3.73
   1 -23   5  117.72    3.81
   1  24  -5    4.77    0.69
  -1 -24   5    4.52    0.71
  -1 -24   5    4.07    0.66
  -1 -24   5    3.55    0.69
   1  24  -4    2.03    0.58
   1  24  -4    3.15    0.70
  -1 -24   4    2.02    0.68
  -1 -24   4    2.30    0.63
  -1 -24   4    2.53    0.65
   1  24  -3   77.96    3.21
  -1 -24   3   79.32    3.20
  -1 -24   3   78.96    3.25
   1  24  -3   76.56    3.19
   1  24  -2    9.11    1.22
  -1  24   2    7.15    0.98
   1  24  -2    8.72    1.13
   1  24  -1    0.39    0.56
  -1  24   1   -0.40    0.55
   1  24  -1    0.44    0.45
  -1  24   0   23.22    1.80
   1  24   0   23.35    1.98
  -1  24   0   19.84    1.73
  -1  24  -1   54.56    2.92
  -1  24  -1   55.72    2.70
   1  24   1   57.60    3.05
   1 -24   2   72.00    3.01
  -1  24  -2   73.82    3.36
   1 -24   2   66.32    3.02
   1  24   2   77.34    3.46
  -1  24  -3   -0.38    0.59
   1 -24   3    0.02    0.52
   1 -24   3   -0.33    0.57
   1 -24   4   28.72    1.74
   1 -24   4   31.57    1.91
   1 -24   4   28.74    1.85
  -1  24  -4   32.44    1.91
   1 -24   5   23.13    1.41
   1 -24   5   25.26    1.44
   1 -24   5   23.34    1.45
  -1  24  -5   24.65    1.44
   1  25  -4    4.34    0.68
  -1 -25   4    4.17    0.72
  -1 -25   4    4.36    0.67
  -1 -25   4    5.35    0.78
  -1 -25   3   42.71    2.20
   1  25  -3   39.56    2.00
  -1 -25   3   37.92    1.98
   1  25  -3   41.72    2.07
   1  25  -2   27.83    1.71
  -1 -25   2   30.18    1.83
   1  25  -2   25.75    1.80
   1  25  -1    1.75    0.63
  -1  25   1    1.88    0.56
  -1  25   0    1.52    0.60
   1  25   0    1.32    0.58
  -1  25  -1   26.17    1.83
  -1  25  -1   29.15    1.75
   1  25   1   29.97    2.04
  -1  25  -2  145.59    4.57
   1 -25   3    1.57    0.52
   1 -25   3    1.98    0.59
   1 -25   3    1.95    0.65
  -1  25  -3    1.95    0.58
   1 -25   4   18.67    1.30
  -1  25  -4   21.58    1.39
   1 -25   4   19.10    1.29
   1 -25   4   19.97    1.34
   1  26  -3    2.64    0.53
  -1 -26   3    2.17    0.55
  -1 -26   2   25.78    1.47
  -1 -26   2   28.86    1.63
   1  26  -2   30.05    1.70
  -1 -26   1    0.56    0.46
   1  26  -1    0.63    0.43
  -1  26   1    0.01    0.47
  -1  26   0   85.87    2.97
   1  26   0   88.33    3.29
  -1  26  -1  114.38    3.60
  -1  26  -2    1.28    0.51
   1 -26   2    2.01    0.56
   1 -26   3    5.36    0.74
  -1  26  -3    5.79    0.74
   1  27  -1   23.01    1.37
  -2   0  11    0.53    0.44
  -2   0  10    5.88    1.20
  -2   0   9    0.02    0.93
  -2   0   8   17.13    2.30
  -2   0   7   -0.10    0.89
  -2   0   7   -0.39    0.93
  -2   0   7    0.49    0.65
   2   0  -6 2303.50   37.04
   2   0  -5    0.13    0.44
  -2   0   5    0.34    0.42
   2   0  -4 2076.74   31.54
  -2   0   4 2037.07   31.72
  -2   0   4 2041.77   30.57
  -2   0   3   -0.12    0.29
  -2   0   3    0.08    0.10
  -2   0   3    0.02    0.23
  -2   0   2   40.19    1.47
  -2   0   1    6.62    0.65
  -2   0   1    0.16    0.17
  -2   0   0   23.81    1.17
  -2   0  -1    2.28    0.45
  -2   0  -2 1426.55   22.23
  -2   0  -3    2.73    0.72
   2   0   3    0.72    0.40
   2   0   4  925.88   15.22
  -2   0  -4  912.57   16.48
  -2   0  -5    0.73    0.60
   2   0   6   59.66    3.58
  -2   0  -6   65.38    3.65
   2   0   7    0.66    0.93
  -2   0  -7    0.09    0.79
   2   0   8   33.10    2.89
   2   0   8   32.09    2.92
   2   0   9    0.06    0.70
   2   0   9   -0.29    0.87
   2   0  10   25.79    1.92
   2   0  10   27.92    1.95
  -2   1  11    5.73    0.82
  -2  -1  11    7.49    0.93
  -2  -1  10  144.50    5.36
  -2   1  10  140.98    5.30
  -2   1   9   13.46    1.93
  -2  -1   9   14.90    2.04
  -2  -1   8   36.97    3.26
  -2   1   8   39.36    3.27
  -2   1   8   41.43    3.41
  -2   1   7    0.67    0.68
  -2  -1   7    0.81    0.86
  -2   1   7    1.71    0.95
  -2  -1   7    0.69    0.78
  -2  -1   7    0.64    0.72
   2  -1  -6  102.00    4.06
   2   1  -6   95.06    4.08
  -2   1   6  101.76    4.08
  -2   1   5  146.62    4.78
   2  -1  -5  149.97    4.55
   2   1  -5  156.16    4.80
  -2  -1   5  153.30    4.57
   2  -1  -4  163.54    4.30
   2   1  -4  161.57    4.48
  -2   1   4  164.98    4.69
  -2   1   4  172.12    3.73
  -2  -1   4  174.35    4.44
  -2  -1   4  161.46    3.96
  -2  -1   4  172.93    4.52
   2  -1  -3  645.25   11.08
  -2  -1   3  673.44   11.07
  -2  -1   3  690.61   11.47
  -2  -1   3  671.72   11.38
  -2   1   3  670.15   10.83
  -2   1   3  641.61   11.57
  -2   1   3  666.45    9.91
  -2  -1   2   74.36    2.22
  -2   1   2   71.82    2.07
  -2  -1   2   71.60    2.12
  -2   1   1 4543.37   66.43
  -2  -1   1 4787.15   67.02
   2   1  -1 4479.26   65.79
  -2   1   1 4692.74   66.97
  -2  -1   1 4728.25   65.94
  -2  -1   0  938.13   14.74
  -2   1   0  943.94   14.79
  -2   1  -1  178.94    4.07
  -2  -1  -1  180.38    3.96
  -2  -1  -2  837.25   13.54
  -2   1  -2  815.46   13.64
   2  -1   3 5332.74   77.23
   2   1   3 5337.30   76.58
  -2  -1  -3 5415.14   78.12
  -2   1  -3 5362.05   77.88
  -2   1  -4  804.17   14.89
   2  -1   4  818.81   14.07
  -2  -1  -4  826.69   15.10
  -2  -1  -5   52.48    2.95
  -2   1  -5   57.50    3.07
   2   1   6   53.35    3.35
   2  -1   6   52.16    3.32
  -2   1  -6   53.65    3.29
  -2  -1  -6   57.74    3.41
  -2  -1  -7  213.06    7.56
   2   1   7  220.39    7.64
   2  -1   7  218.70    7.61
  -2   1  -7  221.83    7.68
   2   1   8  321.29    9.58
   2  -1   8  322.65    9.55
   2   1   8  305.32    9.52
   2   1   9    8.12    1.47
   2  -1   9    8.55    1.49
   2  -1   9    9.31    1.48
   2   1   9    6.68    1.28
   2   1  10   12.70    1.35
   2  -1  10   11.77    1.34
   2   1  10   12.46    1.35
   2  -1  10   11.59    1.34
  -2  -2  11   71.25    2.69
  -2   2  11   70.23    2.67
  -2   2  10  157.24    5.60
  -2  -2  10  154.30    5.56
  -2  -2   9  101.63    5.11
  -2   2   9  108.28    5.23
  -2  -2   9  112.75    5.31
  -2   2   8    5.02    1.44
  -2  -2   8    3.15    1.17
  -2   2   8    3.02    1.11
  -2  -2   8    5.42    1.24
  -2   2   8    3.52    0.86
  -2  -2   8    2.49    1.02
  -2  -2   7   33.50    2.54
  -2   2   7   35.51    2.45
  -2   2   7   35.52    3.07
  -2  -2   7   34.22    2.71
  -2  -2   7   34.80    3.00
   2  -2  -6  192.74    5.77
  -2   2   6  183.07    5.97
   2  -2  -5  329.56    7.46
  -2  -2   5  340.95    7.52
  -2  -2   5  330.04    6.89
  -2   2   5  319.76    7.99
   2  -2  -4   50.19    2.09
  -2  -2   4   50.91    2.16
  -2  -2   4   51.69    2.04
  -2   2   4   47.54    2.38
  -2  -2   4   52.08    2.23
  -2   2   3  211.30    4.23
  -2   2   3  207.32    5.09
  -2   2   3  220.38    3.75
  -2  -2   3  212.33    4.65
  -2  -2   3  206.92    4.78
  -2  -2   3  209.37    4.64
   2  -2  -3  214.12    4.47
  -2   2   2 1710.89   25.75
  -2  -2   2 1732.25   26.06
  -2   2   2 1750.97   25.83
  -2  -2   2 1753.65   26.10
  -2  -2   1 1397.75   20.95
  -2  -2   1 1395.09   21.16
  -2   2   1 1393.59   20.78
  -2   2   1 1404.34   21.08
   2   2  -1 1396.73   20.21
  -2  -2   0 4009.68   57.48
  -2   2   0 3975.25   57.61
  -2  -2  -1  233.03    4.79
  -2   2  -1  237.08    4.54
   2  -2   2   18.96    1.17
  -2  -2  -2   20.86    1.15
  -2   2  -2   17.58    1.11
   2  -2   3 3623.19   53.52
  -2   2  -3 3672.30   53.80
   2   2   3 3671.80   52.23
  -2  -2  -3 3613.98   54.19
   2  -2   4  664.96   12.15
  -2  -2  -4  666.11   12.97
  -2   2  -4  667.89   12.73
   2  -2   5  233.77    6.00
  -2  -2  -5  231.26    6.78
  -2   2  -5  227.42    6.68
   2  -2   6  121.58    5.16
  -2   2  -6  118.30    5.02
   2   2   6  134.06    5.47
  -2  -2  -6  124.22    5.17
  -2  -2  -7 1120.04   21.87
   2   2   7 1089.14   21.95
   2   2   7 1063.00   21.63
   2  -2   7 1094.64   21.64
  -2   2  -7 1072.23   21.73
   2   2   8  214.95    7.56
   2  -2   8  217.22    7.57
   2   2   8  218.55    7.74
   2   2   9   89.62    4.31
   2  -2   9   90.64    4.34
   2  -2   9   89.51    4.41
   2   2   9   86.97    4.32
   2   2  10    0.22    0.56
   2  -2  10   -0.13    0.56
   2  -2  10    0.35    0.52
   2   2  10    0.12    0.50
  -2   3  11   23.82    1.48
  -2  -3  11   22.55    1.47
  -2   3  10    1.05    0.78
  -2  -3  10    1.24    0.89
  -2  -3   9   -0.33    0.76
  -2   3   9    0.01    0.88
  -2  -3   9    0.10    0.62
  -2  -3   8    5.79    1.39
  -2   3   8    4.67    1.32
  -2   3   8    5.47    1.38
  -2  -3   8    4.81    1.02
  -2  -3   8    4.11    1.06
  -2   3   8    3.89    0.93
  -2  -3   7  125.37    5.46
  -2  -3   7  123.73    5.76
  -2  -3   7  138.78    5.33
  -2   3   7  122.04    5.73
  -2   3   7  134.39    6.07
  -2   3   7  136.51    4.94
  -2   3   6   32.99    2.41
   2  -3  -6   35.92    2.29
  -2   3   6   39.58    3.00
  -2   3   5    1.33    0.60
   2  -3  -5    1.31    0.56
  -2  -3   5    1.84    0.59
  -2  -3   5    0.68    0.37
   2  -3  -4   97.03    2.97
  -2  -3   4  105.93    3.37
  -2   3   4   94.00    3.56
  -2  -3   4   94.65    3.07
  -2  -3   4   98.32    2.99
  -2  -3   3  608.44   10.01
  -2  -3   3  553.16   10.23
  -2   3   3  572.94   10.79
   2  -3  -3  584.86    9.73
  -2  -3   3  557.27   10.30
  -2   3   3  601.11    9.24
  -2   3   3  587.70    9.49
  -2  -3   2  284.73    5.73
  -2   3   2  291.30    5.36
  -2   3   2  294.77    5.61
  -2  -3   2  276.31    5.63
  -2   3   2  289.71    5.97
  -2   3   1  577.49    9.58
  -2  -3   1  576.17    9.69
  -2  -3   1  562.44    9.42
   2   3  -1  569.91    8.98
  -2   3   1  586.31    9.45
  -2  -3   0  698.73   10.59
   2   3   0  660.60   10.79
  -2   3   0  673.87   10.11
  -2  -3   0  666.47   11.07
  -2   3   0  689.06   11.31
  -2  -3  -1  838.05   13.30
  -2   3  -1  819.16   12.84
   2   3   2 3333.55   46.64
  -2  -3  -2 3215.15   47.67
  -2   3  -2 3237.63   47.81
   2  -3   2 3206.14   48.18
   2  -3   3   39.20    1.94
  -2  -3  -3   37.25    2.06
  -2   3  -3   37.06    1.89
   2  -3   4    7.76    0.97
  -2  -3  -4   10.21    1.27
  -2   3  -4   10.36    1.17
  -2   3  -5 1047.34   19.19
  -2  -3  -5 1038.10   19.31
   2  -3   5 1038.96   18.33
  -2   3  -6   48.76    3.15
   2  -3   6   51.01    3.29
   2   3   6   54.66    3.44
   2   3   6   56.35    3.54
  -2  -3  -6   54.98    3.35
  -2  -3  -7   92.10    4.76
  -2   3  -7   92.09    4.78
   2   3   7   93.93    4.85
   2  -3   7   93.01    4.74
   2   3   7   91.62    4.83
   2   3   7   90.89    4.49
   2   3   8   15.68    1.85
   2   3   8   14.10    1.96
   2   3   8   17.17    2.12
   2  -3   8   19.69    2.20
   2   3   9  105.47    4.68
   2  -3   9  107.73    4.70
   2  -3   9  108.06    4.84
   2   3   9   98.39    4.57
   2   3  10    6.24    0.98
   2   3  10    6.63    1.01
   2  -3  10    7.33    1.11
   2  -3  10    7.04    1.07
  -2   4  10   21.64    1.97
  -2  -4  10   21.76    1.95
  -2   4   9    1.66    1.06
  -2  -4   9    1.80    0.66
  -2   4   8    6.54    1.48
  -2   4   8    5.37    1.05
  -2  -4   8    3.87    1.23
  -2  -4   8    5.08    1.17
  -2   4   8    5.73    1.46
  -2  -4   8    3.64    1.12
  -2   4   7   34.48    2.95
  -2   4   7   31.35    2.93
  -2  -4   7   32.43    2.85
  -2   4   7   34.72    2.40
  -2  -4   7   34.79    2.85
  -2  -4   6  319.56    9.26
  -2   4   6  320.51    9.44
  -2  -4   6  346.20    8.20
  -2   4   6  322.18    9.28
  -2   4   6  318.31    8.78
  -2   4   5  493.62   11.10
  -2  -4   5  506.59   10.29
  -2  -4   5  487.68    9.88
   2  -4  -5  509.92    9.93
   2  -4  -4  359.90    6.94
  -2  -4   4  345.71    7.41
  -2  -4   4  334.42    7.39
  -2   4   4  346.96    8.13
  -2   4   3    0.13    0.20
  -2  -4   3    0.26    0.37
   2  -4  -3   -0.05    0.21
  -2   4   3    0.15    0.44
  -2   4   3    0.27    0.22
  -2  -4   2  293.37    5.87
  -2   4   2  291.35    6.17
  -2  -4   2  285.50    5.98
  -2   4   2  303.97    5.90
  -2   4   2  293.73    5.48
   2   4  -1 2562.50   37.68
  -2  -4   1 2622.71   38.33
  -2  -4   1 2625.00   37.98
  -2   4   1 2601.01   38.06
  -2  -4   0  348.81    6.37
  -2   4   0  332.64    5.16
  -2  -4   0  341.82    5.86
   2   4   0  340.76    6.22
   2   4   1   28.63    1.44
  -2   4  -1   29.66    1.15
  -2  -4  -2  378.45    6.77
   2  -4   2  364.85    7.34
  -2   4  -2  367.94    6.80
   2  -4   3  275.27    6.44
  -2   4  -3  277.48    6.25
  -2  -4  -3  275.55    6.65
   2  -4   3  281.45    5.14
  -2   4  -4   14.29    1.37
   2  -4   4   14.29    1.34
  -2  -4  -4   15.83    1.51
  -2   4  -5  776.38   15.14
  -2  -4  -5  743.54   15.21
   2  -4   5  757.02   14.60
  -2   4  -6  160.86    6.02
   2   4   6  158.42    6.15
   2   4   6  171.02    6.34
   2   4   6  158.81    6.23
   2  -4   6  165.02    5.64
   2  -4   6  152.98    5.91
  -2  -4  -6  167.15    6.14
  -2  -4  -7  247.11    8.22
   2   4   7  242.85    8.22
   2  -4   7  250.54    8.17
   2   4   7  258.99    7.95
   2   4   7  242.67    8.31
   2  -4   8    5.40    1.27
   2   4   8    6.36    1.46
   2   4   8    7.41    1.41
   2   4   8    5.47    1.33
   2  -4   9   37.60    2.74
   2   4   9   38.30    2.77
   2  -4   9   41.03    2.96
   2   4   9   37.33    2.72
   2  -4  10    0.79    0.62
   2   4  10    0.59    0.49
   2   4  10    0.51    0.51
   2  -4  10    0.64    0.58
  -2   5  10   65.66    3.32
  -2  -5  10   56.49    3.12
  -2  -5   9  227.35    6.86
  -2   5   9  237.98    7.91
  -2  -5   8    6.66    1.40
  -2   5   8    7.69    1.15
  -2   5   8    8.28    1.67
  -2   5   8    7.35    1.49
  -2  -5   8    8.37    1.41
  -2  -5   8    8.53    1.58
  -2   5   7   46.14    2.75
  -2  -5   7   44.61    3.27
  -2  -5   7   50.11    3.51
  -2   5   7   39.69    3.27
  -2   5   7   45.69    3.46
  -2  -5   6    7.49    1.10
  -2   5   6    6.67    1.05
  -2  -5   6    4.82    1.12
  -2  -5   6    6.66    1.19
  -2  -5   6    7.15    1.31
  -2   5   6    6.88    1.28
  -2   5   6    6.00    1.32
  -2   5   6    5.58    1.29
  -2  -5   5  102.54    3.77
  -2   5   5   96.62    4.18
  -2  -5   5  103.06    3.66
  -2   5   4  658.55   13.33
  -2  -5   4  663.68   12.50
  -2  -5   4  678.71   12.56
  -2   5   3    7.87    0.66
   2  -5  -3    8.25    0.60
  -2  -5   3    7.75    0.86
  -2   5   3    6.62    0.90
  -2  -5   3    6.98    0.86
  -2  -5   2  293.39    6.13
  -2   5   2  303.17    6.53
  -2   5   2  315.47    6.26
  -2  -5   2  308.40    6.39
  -2  -5   1 5882.73   83.48
  -2  -5   1 5899.20   83.87
  -2   5   1 5642.14   83.55
   2   5  -1 5926.31   83.35
  -2  -5   0  255.32    4.73
   2   5   0  249.12    5.19
  -2  -5   0  250.95    5.18
  -2   5  -1  218.57    4.17
   2   5   1  216.62    4.94
  -2  -5  -1  222.91    4.69
  -2  -5  -1  222.82    3.91
  -2   5  -2  561.07    9.71
  -2  -5  -2  558.34    9.63
   2   5   2  542.59   10.35
   2  -5   2  569.13   10.56
  -2   5  -3  172.17    4.59
   2  -5   3  167.62    4.87
  -2   5  -4 1116.76   19.08
   2  -5   4 1083.52   19.23
  -2  -5  -4 1083.67   19.56
   2  -5   5  119.57    4.53
  -2   5  -5  127.89    4.77
   2   5   5  125.97    5.00
  -2  -5  -5  122.10    4.81
  -2   5  -6  299.46    8.75
   2  -5   6  308.71    8.84
   2   5   6  304.50    9.06
  -2  -5  -6  305.80    8.87
   2  -5   6  310.74    8.37
   2   5   6  307.64    9.15
   2   5   6  304.05    9.05
   2   5   6  297.91    8.58
   2  -5   7    3.96    1.19
   2   5   7    1.68    0.90
   2   5   7    1.73    1.05
   2   5   7    3.66    1.20
   2  -5   8    0.41    0.80
   2   5   8   -0.58    0.78
   2   5   8    1.18    0.89
   2   5   8   -0.32    0.79
   2   5   9   72.65    3.78
   2  -5   9   79.22    3.91
   2   5   9   76.94    3.86
   2   5  10   73.53    2.99
   2  -5  10   69.08    2.99
   2  -5  10   73.06    3.14
  -2  -6  10    2.08    0.77
  -2   6  10    1.43    0.72
  -2  -6   9   61.39    3.27
  -2   6   9   59.36    3.70
  -2  -6   8   19.00    2.04
  -2   6   8   16.33    2.12
  -2  -6   8   18.41    2.18
  -2   6   8   16.39    1.65
  -2  -6   8   16.17    2.10
  -2   6   7    3.65    1.18
  -2  -6   7    2.82    1.14
  -2  -6   7    3.84    1.15
  -2   6   7    3.22    0.87
  -2   6   7    2.16    1.16
  -2  -6   6   46.90    2.76
  -2   6   6   47.92    3.16
  -2  -6   6   47.47    2.98
  -2  -6   6   52.61    3.35
  -2  -6   6   47.34    3.22
  -2   6   6   46.66    2.64
  -2  -6   6   48.79    2.86
  -2   6   6   46.11    3.25
  -2  -6   6   47.77    3.02
  -2   6   6   50.06    3.41
  -2  -6   5   55.86    2.76
  -2   6   5   53.55    3.15
  -2  -6   5   55.51    2.78
  -2  -6   4  211.46    5.54
  -2   6   4  202.96    6.11
  -2  -6   4  217.31    5.68
  -2  -6   3  730.62   13.51
  -2   6   3  742.34   13.97
  -2  -6   3  735.50   13.29
  -2   6   2  234.12    5.58
  -2  -6   2  227.25    5.39
  -2  -6   2  227.31    5.22
  -2   6   2  233.32    5.26
  -2  -6   1   30.68    1.57
  -2   6   1   29.90    1.56
  -2  -6   1   32.28    1.47
  -2   6   1   32.01    1.55
  -2  -6   0 1882.76   27.91
  -2  -6   0 1871.19   28.09
   2   6   0 1879.64   28.71
  -2  -6   0 1910.48   28.53
  -2  -6  -1  305.59    6.00
  -2  -6  -1  303.97    5.17
   2   6   1  300.96    6.40
  -2  -6  -1  295.81    5.50
  -2   6  -1  297.43    5.36
  -2   6  -2   63.67    2.19
  -2  -6  -2   62.95    2.15
   2   6   2   61.83    2.59
   2  -6   2   66.53    2.71
   2  -6   3   26.42    1.83
  -2   6  -3   26.85    1.63
   2   6   3   26.64    1.83
  -2   6  -4   11.58    1.26
  -2  -6  -4   12.09    1.41
   2   6   4   11.23    1.41
   2  -6   4   10.50    1.29
  -2   6  -5   47.03    2.82
  -2  -6  -5   45.29    2.88
   2  -6   5   42.59    2.71
   2   6   5   49.00    3.11
  -2   6  -6 1002.23   19.94
   2  -6   6 1014.72   20.00
   2   6   6 1020.06   20.52
   2   6   6 1011.38   20.39
   2  -6   6 1029.00   19.41
   2   6   6 1011.12   19.81
  -2  -6  -6  997.29   19.99
   2   6   6 1022.84   20.52
   2   6   7   54.25    3.67
   2   6   7   52.27    3.36
   2  -6   7   54.13    3.58
   2   6   7   50.14    3.55
   2  -6   7   49.26    3.06
   2   6   8    1.97    1.08
   2   6   8    0.29    0.73
   2   6   8    0.33    0.91
   2  -6   8    0.86    0.88
   2   6   9    0.45    0.70
   2   6   9    0.68    0.65
   2  -6   9    1.14    0.79
   2   6  10   62.61    2.64
   2  -6  10   65.21    2.82
   2  -6  10   65.06    2.87
  -2  -7  10   13.93    1.24
  -2  -7  10   11.03    1.40
  -2   7  10   12.23    1.40
  -2  -7   9   65.53    3.38
  -2   7   9   67.20    3.89
  -2  -7   8  106.35    4.85
  -2  -7   8  111.74    5.39
  -2   7   8  112.29    4.29
  -2   7   8  112.64    5.50
  -2  -7   8  110.34    5.13
  -2   7   7   88.50    4.89
  -2   7   7   87.99    4.90
  -2  -7   7   90.15    4.80
  -2  -7   7   95.20    4.77
  -2   7   7   91.45    3.96
  -2  -7   7   97.77    4.48
  -2  -7   7   99.18    4.34
  -2   7   6   49.18    3.42
  -2  -7   6   48.45    3.31
  -2   7   6   52.35    3.41
  -2  -7   6   54.81    3.27
  -2  -7   6   59.55    3.57
  -2   7   6   53.56    3.53
  -2  -7   6   48.48    3.07
  -2  -7   6   53.51    3.01
  -2  -7   6   57.96    3.04
  -2  -7   6   50.56    2.99
  -2   7   6   54.38    2.90
  -2  -7   5  474.08   10.28
  -2  -7   5  465.90   10.30
  -2   7   5  465.16   11.18
  -2  -7   4   58.67    2.71
  -2   7   4   58.39    3.08
  -2  -7   4   64.25    2.94
  -2  -7   3  389.38    8.11
  -2  -7   3  380.99    8.29
  -2   7   3  386.95    8.72
  -2  -7   2  252.56    5.90
  -2   7   2  240.53    5.96
  -2   7   2  247.73    5.69
  -2  -7   2  246.14    5.62
  -2   7   1 1080.09   17.70
  -2  -7   1 1068.61   17.80
  -2  -7   1 1118.64   17.53
  -2   7   1 1101.80   17.88
  -2  -7   1 1099.99   17.52
  -2  -7   0  205.98    4.56
  -2  -7   0  208.25    4.41
  -2   7   0  216.44    4.74
  -2  -7   0  208.81    4.82
   2   7   0  217.09    5.08
  -2   7   0  214.30    4.86
  -2  -7  -1    3.53    0.41
  -2  -7  -1    2.84    0.53
   2   7   1    4.33    0.69
  -2   7  -1    4.17    0.45
  -2  -7  -1    3.23    0.44
  -2   7  -2   87.48    2.69
   2   7   2   87.01    3.27
  -2  -7  -2   85.38    2.63
  -2  -7  -2   91.07    2.28
   2  -7   2   88.58    3.35
   2  -7   3  605.56   12.25
   2   7   3  630.87   12.37
  -2   7  -3  609.28   11.40
  -2   7  -4   60.75    2.89
   2  -7   4   57.05    3.07
   2   7   4   62.52    3.24
  -2  -7  -4   57.92    3.07
  -2   7  -5   84.27    3.88
  -2  -7  -5   82.64    4.01
   2   7   5   78.85    4.06
   2   7   5   81.55    4.13
   2  -7   5   77.09    3.97
   2  -7   5   80.02    3.91
   2  -7   5   85.59    3.90
   2  -7   5   88.55    3.86
  -2   7  -6  414.80   10.82
   2   7   6  412.91   11.13
   2   7   6  428.65   10.88
   2   7   6  416.55   11.19
   2  -7   6  426.92   10.54
   2   7   6  417.54   11.30
   2  -7   6  415.30   10.84
  -2  -7  -6  409.28   10.84
   2  -7   6  427.92   10.37
   2   7   7   56.41    3.71
   2   7   7   54.58    3.46
   2  -7   7   58.70    3.70
   2  -7   7   60.15    3.41
   2   7   7   56.41    3.79
   2   7   8  321.08    9.41
   2   7   8  318.60    8.77
   2  -7   8  326.20    9.32
   2   7   8  314.36    9.30
   2  -7   9   42.78    2.75
   2   7   9   38.56    2.62
   2  -7  10   63.58    2.68
   2  -7  10   65.68    2.77
  -2   7 -10   58.65    2.21
  -2  -8  10    1.74    0.63
  -2   8  10    1.25    0.70
  -2  -8  10    1.89    0.77
  -2  -8   9   18.95    1.79
  -2   8   9   15.22    1.92
  -2   8   8   95.67    5.01
  -2  -8   8   91.41    4.28
  -2  -8   8   91.84    4.86
  -2  -8   7    1.07    0.95
  -2   8   7    1.13    0.98
  -2  -8   7    2.06    0.90
  -2   8   7    0.60    0.74
  -2   8   7    3.97    0.98
  -2  -8   6    0.84    0.65
  -2   8   6    0.02    0.59
  -2  -8   6    0.38    0.62
  -2  -8   6    0.28    0.68
  -2  -8   6   -0.80    0.75
  -2   8   6    1.57    0.93
  -2   8   6    0.52    0.87
  -2  -8   6   -0.30    0.72
  -2   8   6   -0.30    0.84
  -2  -8   6    0.55    0.74
  -2  -8   5  277.24    7.47
  -2  -8   5  282.35    7.39
  -2   8   5  264.02    8.07
  -2   8   4  183.92    5.97
  -2  -8   4  180.00    5.29
  -2  -8   4  176.97    5.48
  -2   8   3    0.58    0.46
  -2  -8   3    1.49    0.62
  -2  -8   3    2.04    0.65
  -2   8   2  374.48    7.81
  -2  -8   2  364.61    7.96
  -2  -8   2  366.32    7.67
  -2   8   2  372.78    8.18
  -2   8   1  269.27    5.89
  -2  -8   1  266.25    5.95
  -2   8   1  257.17    5.91
  -2  -8   1  251.09    5.55
  -2   8   0   89.15    2.91
  -2   8   0   81.89    2.69
   2   8   0   89.16    3.07
  -2  -8   0   82.17    2.63
  -2  -8   0   86.56    2.56
  -2  -8   0   84.71    2.84
  -2  -8  -1  956.43   14.80
   2   8   1  931.37   16.44
  -2   8  -1  988.27   15.24
  -2  -8  -1  934.72   15.25
   2  -8   1  942.88   16.58
  -2  -8  -1  959.28   15.64
  -2   8  -2  686.06   11.87
  -2  -8  -2  718.14   11.39
  -2  -8  -2  684.68   11.83
   2  -8   2  686.34   13.23
   2   8   2  684.91   13.12
   2  -8   3  197.64    5.97
  -2   8  -3  204.11    5.27
   2   8   3  211.67    6.06
   2   8   4  498.41   11.30
  -2   8  -4  478.47   10.39
   2  -8   4  479.29   11.11
  -2  -8  -4  484.91   10.99
   2   8   5   23.07    2.24
  -2   8  -5   21.66    1.95
   2   8   5   22.01    2.12
   2  -8   5   19.65    1.89
   2  -8   5   23.22    2.14
   2   8   5   19.63    2.08
   2  -8   5   20.82    1.99
   2  -8   5   23.70    2.00
   2   8   5   21.18    2.12
   2  -8   5   22.48    2.15
  -2  -8  -5   23.55    2.16
  -2   8  -6  368.56   10.08
   2   8   6  376.47   10.12
   2  -8   6  381.40    9.27
   2   8   6  382.10   10.59
   2  -8   6  363.55    9.78
   2  -8   6  372.42    9.64
   2   8   6  364.18   10.42
   2  -8   6  388.91   10.31
  -2  -8  -6  380.94   10.22
   2   8   6  365.27   10.58
   2   8   7   40.50    3.16
   2   8   7   39.03    2.93
   2  -8   7   42.72    3.16
   2  -8   7   42.62    2.87
   2   8   7   37.21    3.04
   2   8   8   41.04    2.78
   2  -8   8   39.33    2.93
   2   8   8   39.06    2.93
   2   8   8   41.90    3.09
   2   8   9    1.51    0.64
   2  -8   9    0.69    0.67
   2   8   9    0.71    0.69
   2  -8  10   19.53    1.41
   2  -8  10   18.09    1.39
  -2   9  10   21.22    1.67
  -2  -9  10   18.79    1.32
  -2  -9  10   21.97    1.74
  -2   9   9  113.46    4.87
  -2  -9   9  110.75    4.40
  -2  -9   8   21.69    2.42
  -2  -9   8   25.01    2.25
  -2   9   8   19.16    2.31
  -2   9   7  203.33    7.68
  -2   9   7  227.27    6.54
  -2  -9   7  223.10    7.99
  -2  -9   7  224.88    7.45
  -2   9   6  143.26    6.03
  -2   9   6  141.51    6.00
  -2  -9   6  152.14    5.50
  -2  -9   6  146.47    6.15
  -2  -9   6  136.24    5.30
  -2   9   6  145.59    6.09
  -2  -9   6  147.56    5.76
  -2  -9   6  147.14    5.22
  -2   9   6  148.68    5.06
  -2  -9   6  145.91    5.44
  -2  -9   5    1.52    0.90
  -2  -9   5    0.42    0.64
  -2  -9   5    1.30    0.68
  -2  -9   5    1.33    0.73
  -2  -9   5    0.43    0.63
  -2  -9   5    0.02    0.52
  -2   9   5    1.18    0.82
  -2   9   5    2.84    1.06
  -2  -9   4   34.23    2.33
  -2  -9   4   38.06    2.32
  -2   9   4   36.16    2.58
  -2  -9   3  509.90   10.75
  -2   9   3  501.40   11.03
  -2  -9   3  512.42   10.39
  -2   9   2 1127.13   18.75
  -2   9   2 1065.54   19.09
  -2  -9   2 1144.59   18.49
  -2  -9   2 1096.31   18.56
  -2  -9   2 1086.46   18.96
  -2   9   1   42.32    2.13
  -2  -9   1   40.08    1.92
  -2   9   1   40.04    2.03
  -2  -9   1   40.19    1.93
  -2  -9   1   40.64    2.09
  -2  -9   0   22.91    1.30
  -2   9   0   23.18    1.51
  -2  -9   0   22.95    1.38
  -2   9   0   20.73    1.34
  -2  -9   0   20.27    1.39
   2   9   0   24.14    1.62
  -2  -9  -1  262.28    5.16
  -2   9  -1  260.03    5.41
  -2  -9  -1  264.09    5.83
   2   9   1  256.43    6.47
  -2  -9  -1  265.79    5.61
   2  -9   1  266.58    6.62
  -2  -9  -2    0.22    0.30
  -2  -9  -2    0.37    0.31
   2   9   2    0.73    0.58
   2  -9   3  590.62   12.58
   2   9   3  603.62   12.63
  -2   9  -3  599.84   11.45
   2   9   4  237.39    7.27
  -2   9  -4  238.14    6.54
   2  -9   4  239.08    7.26
  -2  -9  -4  242.40    7.14
   2  -9   5   11.77    1.51
   2  -9   5   13.77    1.71
   2  -9   5   10.79    1.56
   2  -9   5   11.51    1.52
   2   9   5   15.62    1.95
   2   9   5   11.48    1.63
   2  -9   5   14.63    1.79
   2   9   5   16.34    1.85
  -2   9  -5   12.13    1.54
  -2  -9  -5   10.41    1.52
   2   9   5   14.03    1.84
   2  -9   6    1.48    0.73
   2  -9   6    2.21    1.04
  -2  -9  -6    0.39    0.85
   2   9   6    0.83    0.87
   2   9   6    1.77    0.95
   2  -9   6    2.13    0.93
  -2   9  -6    2.20    1.02
   2   9   6    1.02    0.88
   2  -9   6    1.24    0.89
   2   9   6    1.67    0.92
   2   9   7   80.15    4.47
   2   9   7   72.62    4.00
   2  -9   7   75.85    4.21
   2  -9   7   69.53    3.79
   2   9   7   77.32    4.36
   2   9   8  118.88    5.19
   2   9   8  122.59    4.85
   2  -9   8  129.35    5.30
   2   9   9    1.22    0.68
   2   9   9    1.31    0.67
   2  -9   9    0.59    0.65
   2  -9  10   43.08    1.97
  -2  10  10   43.15    2.24
  -2 -10  10   40.46    2.23
  -2 -10   9    2.34    0.82
  -2  10   9    2.71    0.97
  -2  10   8   85.67    4.60
  -2 -10   8   84.70    4.60
  -2 -10   8   80.07    4.03
  -2  10   7   52.09    3.73
  -2 -10   7   61.61    4.01
  -2 -10   7   49.62    3.17
  -2 -10   7   57.29    3.61
  -2  10   7   54.84    2.92
  -2 -10   6   52.34    3.63
  -2  10   6   54.01    3.65
  -2 -10   6   56.88    3.31
  -2 -10   6   57.41    3.56
  -2 -10   6   57.36    3.41
  -2  10   6   58.69    3.86
  -2 -10   6   56.41    3.32
  -2  10   6   56.64    3.02
  -2  10   5  223.92    7.43
  -2 -10   5  228.56    7.06
  -2 -10   5  234.24    7.27
  -2 -10   5  236.28    6.92
  -2 -10   5  245.11    7.82
  -2 -10   5  235.08    6.95
  -2 -10   5  237.89    7.18
  -2  10   5  223.41    7.56
  -2  10   5  223.24    6.41
  -2 -10   4   60.01    3.23
  -2  10   4   60.33    3.44
  -2 -10   4   60.67    3.08
  -2 -10   3  386.96    9.12
  -2  10   3  398.82    9.54
  -2 -10   3  386.00    8.77
  -2  10   2  466.33   10.17
  -2 -10   2  453.36    9.93
  -2 -10   2  494.52    9.62
  -2 -10   2  469.33    9.69
  -2  10   2  471.26    9.81
  -2 -10   1 2029.89   31.58
  -2  10   1 2008.42   32.06
  -2 -10   1 2078.94   31.74
  -2  10   1 2014.75   31.98
  -2 -10   1 2090.91   32.19
  -2 -10   0 1848.35   28.45
  -2 -10   0 1843.61   28.78
   2 -10   0 1856.40   29.68
   2  10   0 1846.20   29.68
  -2 -10   0 1869.41   29.07
  -2  10   0 1878.22   28.81
  -2  10   0 1834.79   29.20
   2  10   1    6.92    1.05
   2 -10   1    6.80    1.03
  -2 -10  -1    6.71    0.81
  -2 -10  -1    7.71    0.73
  -2 -10  -1    6.62    0.83
   2  10   2   57.32    2.97
  -2 -10  -2   59.08    2.17
   2 -10   2   52.85    2.89
   2 -10   3   51.37    3.04
   2  10   3   54.34    3.08
   2  10   4  494.94   11.83
   2 -10   4  491.38   11.80
  -2 -10  -4  489.20   11.44
   2  10   5    0.54    0.83
   2 -10   5    1.23    0.89
   2 -10   5    0.86    0.82
   2 -10   5    0.09    0.76
   2  10   5    0.62    0.89
   2 -10   5   -0.06    0.81
   2  10   5    0.24    0.76
  -2 -10  -5    1.14    0.68
  -2 -10  -6    9.61    1.67
   2 -10   6   13.03    1.53
   2 -10   6   12.80    1.77
   2 -10   6   13.10    1.75
   2  10   6   15.38    1.97
   2 -10   6   14.87    1.78
   2  10   6   12.71    1.86
   2 -10   7    2.57    0.88
   2 -10   7    2.07    0.88
   2  10   7    2.20    1.11
   2  10   7    2.34    1.03
   2 -10   8    3.82    0.90
   2  10   8    3.22    0.90
   2 -10   8    2.07    0.81
   2  10   8    2.70    1.04
   2 -10   8    2.90    0.96
  -2  10  -9    0.15    0.42
   2 -10   9   -0.23    0.52
  -2  11  10   63.25    2.56
  -2 -11  10   59.31    2.58
  -2 -11   9    2.86    0.80
  -2  11   9    3.78    0.94
  -2  11   8  204.92    7.27
  -2 -11   8  220.24    7.60
  -2 -11   8  208.87    6.82
  -2 -11   7   93.26    4.71
  -2  11   7   91.03    4.87
  -2  11   7   97.06    3.94
  -2 -11   7   94.00    5.01
  -2 -11   7  100.81    4.25
  -2 -11   7   97.76    4.52
  -2  11   6   51.65    3.59
  -2 -11   6   64.98    3.62
  -2 -11   6   64.16    3.82
  -2 -11   6   58.53    3.44
  -2  11   6   64.06    3.20
  -2 -11   6   59.70    3.59
  -2 -11   6   59.05    3.88
  -2 -11   5   16.13    1.82
  -2  11   5   17.40    1.64
  -2 -11   5   18.59    2.03
  -2  11   5   15.33    1.96
  -2  11   5   14.52    1.87
  -2 -11   5   18.81    1.91
  -2 -11   5   16.81    2.06
  -2 -11   5   16.94    1.88
  -2 -11   5   17.51    1.82
  -2 -11   4  560.52   12.17
  -2  11   4  566.97   13.12
  -2 -11   4  582.16   12.78
  -2  11   3   12.14    1.51
  -2 -11   3   13.55    1.44
  -2 -11   3   13.79    1.55
  -2 -11   2  740.32   14.30
  -2  11   2  728.72   14.36
  -2  11   2  748.98   14.05
  -2 -11   2  721.27   13.77
  -2 -11   2  741.87   13.73
  -2 -11   1 1208.76   20.40
  -2 -11   1 1226.75   20.92
  -2  11   1 1227.34   20.82
   2 -11  -1 1231.87   20.79
  -2 -11   1 1225.52   20.48
  -2  11   1 1235.65   20.79
  -2 -11   0  726.06   13.15
  -2 -11   0  718.08   12.79
   2  11   0  761.77   14.17
   2 -11   0  706.52   13.81
  -2  11   0  719.56   13.02
  -2 -11   0  724.49   13.29
  -2  11   0  730.32   13.50
  -2  11  -1  584.54   11.38
  -2 -11  -1  588.58   10.80
   2  11   1  584.80   12.01
  -2 -11  -1  571.09   10.84
   2 -11   1  557.41   11.91
  -2 -11  -2    2.54    0.55
   2  11   2    1.19    0.65
   2 -11   2    2.15    0.73
   2 -11   3   44.43    2.90
   2  11   3   42.55    2.83
   2  11   4   63.07    3.68
   2  11   4   59.21    3.41
   2 -11   4   60.98    3.64
   2  11   4   69.59    3.91
   2 -11   4   70.55    3.70
   2 -11   4   67.52    3.33
   2 -11   4   65.80    3.44
  -2 -11  -4   65.53    3.55
   2 -11   5   16.06    1.80
   2 -11   5   14.60    1.75
   2  11   5   13.99    1.88
  -2 -11  -5   15.61    1.85
   2  11   5   17.52    2.18
   2 -11   5   20.75    2.21
   2  11   5   16.78    1.93
   2 -11   5   16.24    2.01
   2  11   6   32.90    2.89
   2  11   6   40.36    3.05
   2 -11   6   37.16    2.75
   2 -11   6   30.84    2.45
   2 -11   6   34.07    2.74
   2 -11   6   32.08    2.68
   2  11   7    4.17    1.12
   2 -11   7    6.56    1.38
   2 -11   7    5.58    1.22
   2  11   7    5.21    1.23
   2  11   8    2.68    0.83
   2 -11   8    2.05    0.90
   2 -11   8    1.11    0.52
   2 -11   8    0.52    0.52
  -2  11  -9    3.23    0.66
   2 -11   9    3.41    0.80
  -2 -12   9    9.89    1.23
  -2  12   9    8.77    1.32
  -2 -12   8    8.88    1.37
  -2 -12   8    8.44    1.57
  -2  12   8    8.79    1.51
  -2 -12   7    0.28    0.69
  -2 -12   7   -0.14    0.68
  -2  12   7    1.24    0.94
  -2 -12   7    2.19    1.01
  -2 -12   7    0.42    0.77
  -2 -12   6    1.52    1.06
  -2  12   6    0.62    0.67
  -2  12   6    0.85    1.00
  -2 -12   6    0.81    0.71
  -2 -12   5   34.66    2.61
  -2 -12   5   36.87    2.80
  -2  12   5   35.30    2.85
  -2  12   5   31.12    2.78
  -2  12   5   35.92    2.38
  -2 -12   5   38.42    2.79
  -2 -12   5   34.99    2.95
  -2 -12   5   33.15    2.51
  -2 -12   5   31.06    2.61
  -2 -12   4  638.47   13.66
  -2  12   4  588.28   13.67
  -2  12   4  629.44   12.86
  -2 -12   4  629.71   14.24
  -2  12   4  610.08   14.24
  -2 -12   4  656.77   14.08
  -2 -12   4  659.63   13.58
  -2 -12   4  650.62   13.53
  -2 -12   3    1.77    0.65
  -2  12   3    2.48    0.84
  -2 -12   3    3.20    0.95
  -2 -12   2   50.24    2.68
  -2 -12   2   53.44    2.92
   2 -12  -2   53.12    2.57
  -2  12   2   53.80    2.81
  -2 -12   2   57.33    2.78
  -2  12   2   53.95    2.94
  -2 -12   1   37.46    2.12
  -2  12   1   38.10    2.28
   2 -12  -1   35.10    2.17
  -2 -12   1   38.95    2.35
  -2  12   1   36.76    2.22
  -2 -12   1   36.33    2.15
  -2 -12   0  109.47    3.56
  -2 -12   0  108.12    3.75
  -2  12   0  111.68    3.65
  -2  12   0  108.50    3.96
  -2 -12   0  109.85    3.84
   2 -12   0  105.40    4.11
  -2  12  -1    4.72    0.92
  -2 -12  -1    3.40    0.70
   2  12   1    4.12    0.91
   2 -12   1    2.84    0.81
  -2 -12  -1    2.62    0.65
   2 -12   2   51.13    3.04
   2  12   2   50.71    3.04
   2 -12   3   14.54    1.77
   2  12   3   16.08    1.83
   2  12   4  124.18    5.36
   2  12   4  130.91    5.26
   2 -12   4  120.44    5.46
   2 -12   4  144.45    5.56
   2 -12   4  130.85    4.82
   2  12   4  137.71    5.79
   2  12   4  135.22    4.71
   2 -12   4  126.66    5.04
  -2 -12  -4  121.18    5.07
   2 -12   5  256.32    8.59
   2  12   5  254.20    8.36
   2  12   5  265.53    8.24
   2  12   5  269.77    8.92
   2 -12   5  273.05    8.52
   2 -12   5  263.67    8.05
   2 -12   5  268.51    7.94
  -2 -12  -5  265.88    8.16
   2  12   6  186.11    6.73
   2  12   6  181.37    6.95
   2 -12   6  188.40    6.53
   2 -12   6  183.45    6.18
   2 -12   6  190.64    6.76
   2 -12   6  188.54    6.78
   2 -12   7    0.29    0.67
   2 -12   7    1.66    0.96
   2  12   7   -0.03    0.75
   2 -12   7    1.81    1.03
  -2  12  -8   16.10    1.58
   2  12   8   17.93    1.67
   2 -12   8   16.49    1.76
   2 -12   8   16.06    1.55
   2 -12   8   17.05    1.58
  -2  12  -9   58.26    2.35
   2 -12   9   63.36    2.80
  -2  13   9    0.12    0.50
  -2 -13   9    0.31    0.51
  -2 -13   8   26.88    2.25
  -2  13   8   25.21    2.34
  -2 -13   8   26.61    2.45
  -2 -13   7  210.73    7.36
  -2 -13   7  212.14    7.67
  -2 -13   7  208.33    6.55
  -2  13   7  208.30    7.39
  -2 -13   7  205.68    6.87
  -2  13   6  153.15    6.34
  -2 -13   6  153.62    6.24
  -2  13   6  154.55    5.17
  -2 -13   6  153.96    6.35
  -2 -13   6  156.03    5.94
  -2 -13   6  170.07    6.76
  -2  13   5    9.66    1.35
  -2 -13   5    9.25    1.50
  -2 -13   5   10.51    1.51
  -2  13   5    9.87    1.62
  -2 -13   5   10.12    1.68
  -2 -13   5   10.14    1.58
  -2 -13   5    9.99    1.49
  -2  13   5   10.01    1.73
  -2 -13   5   13.09    1.79
  -2 -13   4  154.85    6.10
  -2 -13   4  159.92    5.69
  -2  13   4  143.48    5.71
  -2 -13   4  161.04    5.66
  -2  13   4  159.44    5.30
  -2 -13   4  160.85    5.73
  -2  13   4  142.15    5.94
  -2 -13   4  157.83    6.00
  -2 -13   3    0.97    0.67
  -2  13   3    1.05    0.67
  -2 -13   3    0.15    0.59
  -2  13   2   58.46    3.07
  -2  13   2   58.88    3.18
  -2 -13   2   60.90    3.24
  -2 -13   2   57.72    2.99
  -2 -13   2   61.71    3.02
  -2 -13   1  168.48    5.06
  -2  13   1  166.31    5.33
  -2 -13   1  157.06    5.23
  -2 -13   1  167.50    5.17
  -2  13   1  163.83    5.16
   2 -13  -1  169.02    5.29
  -2 -13   0   79.13    3.09
   2 -13   0   75.41    3.50
  -2 -13   0   73.72    3.17
  -2 -13   0   74.29    3.16
  -2  13   0   73.38    3.31
  -2 -13  -1  393.68    8.47
  -2 -13  -1  385.90    8.52
   2 -13   1  383.13    9.60
  -2  13  -1  388.46    9.14
   2  13   1  402.41    9.87
  -2  13  -2    1.19    0.69
   2  13   2    2.29    0.88
   2 -13   2    2.29    0.87
   2  13   3   13.21    1.71
  -2  13  -3   14.56    1.67
   2 -13   3   12.51    1.69
   2 -13   3   18.43    1.88
   2 -13   3   14.78    1.63
   2  13   3   14.04    1.52
   2 -13   3   14.14    1.54
   2  13   3   15.92    1.81
  -2  13  -4   57.48    3.37
   2  13   4   52.82    3.31
   2 -13   4   61.82    3.26
   2 -13   4   57.25    3.50
   2  13   4   50.96    3.59
   2 -13   4   55.09    3.68
   2 -13   4   56.74    3.33
  -2 -13  -4   53.73    3.34
   2  13   4   53.08    2.95
   2 -13   5   10.05    1.55
  -2  13  -5   10.84    1.57
   2 -13   5   10.13    1.68
   2 -13   5    8.01    1.43
   2  13   5    9.42    1.49
   2 -13   5   10.12    1.58
   2 -13   6  142.39    5.75
  -2  13  -6  147.73    5.66
   2  13   6  154.19    5.96
   2 -13   6  144.41    5.65
   2 -13   6  141.51    5.79
   2 -13   6  144.27    5.41
  -2  13  -7  481.30   11.08
   2  13   7  460.04   11.12
   2 -13   7  470.11   11.44
   2 -13   7  473.24   10.38
   2 -13   7  464.85   11.26
  -2  13  -8   14.12    1.42
   2  13   8   14.44    1.44
   2 -13   8   16.06    1.53
   2 -13   8   15.99    1.63
   2 -13   8   13.22    1.39
   2 -13   9    0.21    0.46
   2 -13   9    2.17    0.64
  -2 -14   9   10.55    1.13
  -2  14   9    9.30    1.12
  -2  14   8   57.41    3.29
  -2 -14   8   53.78    3.10
  -2 -14   8   57.72    3.40
  -2 -14   7    8.61    1.49
  -2  14   7    8.29    1.48
  -2 -14   7   10.08    1.73
  -2 -14   7    7.68    1.27
  -2 -14   7    9.73    1.43
  -2 -14   6    4.45    1.31
  -2  14   6    3.14    1.08
  -2  14   6    5.93    1.05
  -2 -14   6    2.22    0.96
  -2 -14   6    5.57    1.19
  -2 -14   6    4.85    1.29
  -2  14   5   53.58    3.54
  -2  14   5   57.30    3.04
  -2 -14   5   52.11    3.50
  -2 -14   5   57.06    3.75
  -2 -14   5   53.64    3.39
  -2 -14   5   56.62    3.59
  -2 -14   5   49.10    3.17
  -2 -14   5   54.89    3.38
  -2  14   4   92.28    4.56
  -2  14   4   96.83    4.89
  -2 -14   4  104.52    4.95
  -2 -14   4  104.89    4.64
  -2  14   4  102.02    4.19
  -2 -14   4  109.47    4.65
  -2 -14   4  102.56    4.84
  -2 -14   4  106.93    4.55
  -2  14   3   13.91    1.69
  -2 -14   3   13.15    1.73
  -2  14   3   14.64    1.56
  -2  14   3   16.75    1.90
  -2 -14   3   17.20    1.93
  -2 -14   3   17.33    1.76
  -2  14   2   46.49    2.81
  -2 -14   2   41.42    2.57
  -2  14   2   43.99    2.77
  -2 -14   2   41.57    2.75
  -2 -14   2   40.08    2.58
  -2 -14   1    5.66    0.99
  -2 -14   1    7.17    1.09
  -2  14   1    5.62    0.99
   2 -14  -1    6.98    1.12
  -2 -14   1    7.05    1.16
  -2  14   1    6.48    1.07
   2 -14   0   39.15    2.60
  -2 -14   0   41.88    2.29
  -2  14   0   42.89    2.61
  -2 -14   0   43.13    2.50
  -2 -14   0   40.43    2.41
   2 -14   1  226.95    7.19
  -2 -14  -1  247.37    6.43
  -2  14  -1  237.69    6.83
   2  14   2  222.19    6.61
  -2  14  -2  235.46    7.16
  -2  14  -2  249.25    7.10
   2 -14   2  240.09    7.66
   2  14   2  253.10    7.32
   2  14   2  243.36    7.69
   2  14   3    4.97    1.05
  -2  14  -3    5.31    1.19
   2 -14   3    3.92    1.17
   2  14   3    3.20    1.19
  -2  14  -3    6.55    1.16
   2 -14   3    6.00    1.14
   2 -14   3    6.63    1.25
   2 -14   3    5.53    1.22
   2  14   3    5.37    1.25
   2  14   4   51.83    3.31
  -2  14  -4   46.43    3.09
   2 -14   4   50.09    2.98
   2 -14   4   46.43    3.47
   2 -14   4   44.89    3.14
   2 -14   4   51.71    3.27
   2  14   4   46.68    3.47
  -2 -14  -4   43.56    3.07
   2  14   4   48.60    2.84
  -2  14  -5   26.35    2.36
   2  14   5   24.62    2.38
   2 -14   5   27.74    2.51
   2 -14   5   27.37    2.42
   2 -14   5   30.95    2.71
   2 -14   6   30.99    2.63
  -2  14  -6   31.64    2.54
   2  14   6   27.78    2.50
   2 -14   6   30.02    2.38
   2 -14   6   34.93    2.65
   2 -14   6   35.11    2.78
  -2  14  -7   38.46    2.57
   2  14   7   36.63    2.58
   2 -14   7   38.24    2.69
   2 -14   7   38.66    2.35
   2 -14   7   38.12    2.69
  -2  14  -8    9.43    1.09
   2 -14   8   11.58    1.34
   2 -14   8    9.78    1.15
   2  14   8    9.54    1.11
   2 -14   8    9.44    1.13
  -2  15   9  114.72    3.62
  -2 -15   9  108.51    3.45
  -2  15   8   66.76    3.38
  -2 -15   8   68.06    3.54
  -2 -15   8   68.86    3.39
  -2 -15   7    3.69    0.96
  -2 -15   7    3.53    1.24
  -2 -15   7    3.11    1.01
  -2  15   7    2.87    1.03
  -2 -15   7    3.93    0.97
  -2  15   6   96.41    4.79
  -2 -15   6   95.94    4.55
  -2 -15   6   97.79    4.77
  -2 -15   6   87.26    4.68
  -2  15   6   89.76    3.71
  -2 -15   6   91.55    4.85
  -2 -15   5   -0.71    1.00
  -2  15   5   -0.40    0.56
  -2 -15   5    0.05    0.75
  -2 -15   5    0.45    0.74
  -2 -15   5   -0.22    0.74
  -2  15   5   -0.02    0.82
  -2 -15   4   11.86    1.60
  -2 -15   4   13.98    1.83
  -2 -15   4   11.23    1.60
  -2  15   4    8.97    1.31
  -2 -15   4   12.80    1.84
  -2 -15   4   11.76    1.70
  -2  15   4    9.83    1.58
  -2 -15   3   46.06    2.87
  -2  15   3   41.75    2.92
  -2 -15   3   43.43    2.91
  -2  15   3   40.98    2.98
  -2 -15   3   46.03    3.16
  -2 -15   3   46.49    3.18
  -2  15   3   43.95    2.74
  -2  15   2  119.52    4.46
  -2  15   2  111.75    4.61
  -2  15   2  110.64    4.63
  -2 -15   2  101.85    4.34
  -2  15   2  120.81    4.60
  -2  15   2  108.11    4.60
  -2 -15   2  103.91    4.67
  -2 -15   2  103.80    4.39
  -2  15   1  151.68    5.28
  -2 -15   1  157.13    5.20
  -2 -15   1  151.91    5.41
  -2 -15   1  150.19    5.23
  -2  15   1  148.27    5.37
  -2  15   1  151.20    5.02
  -2  15   0    0.73    0.56
  -2 -15   0    0.97    0.57
  -2  15   0    0.48    0.56
  -2 -15   0    0.38    0.48
   2 -15   0    1.28    0.71
   2  15   0    1.10    0.78
  -2  15  -1   80.51    3.93
   2  15   1   85.09    4.00
  -2  15  -1   80.32    3.83
   2 -15   1   83.35    4.19
  -2 -15  -1   82.44    3.55
   2  15   2   59.91    3.24
   2  15   2   68.83    3.65
  -2  15  -2   59.47    3.44
  -2  15  -2   67.00    3.51
   2 -15   2   67.55    3.93
   2  15   2   69.92    4.04
  -2  15  -3  125.13    5.23
   2  15   3  130.64    5.33
  -2  15  -3  120.54    4.96
   2 -15   3  123.55    4.99
   2 -15   3  122.46    4.98
   2 -15   3  118.80    5.56
   2  15   3  119.40    4.73
   2 -15   3  136.23    5.33
   2  15   3  128.33    5.74
  -2  15  -4   43.27    2.97
   2 -15   4   48.26    3.25
   2 -15   4   48.10    3.15
   2 -15   4   47.57    2.91
  -2  15  -4   44.61    3.09
   2 -15   4   43.43    3.39
   2  15   4   44.43    3.12
   2  15   4   51.32    2.96
  -2  15  -5  405.60   10.60
   2  15   5  428.00   10.95
   2 -15   5  416.37   10.81
   2 -15   5  407.68   11.06
   2 -15   5  418.08   10.69
  -2  15  -6   81.05    4.00
   2  15   6   74.57    3.96
   2 -15   6   75.89    4.02
   2 -15   6   78.10    3.95
   2 -15   6   78.52    4.14
   2 -15   6   83.63    3.94
  -2  15  -7   89.37    3.85
   2 -15   7   98.98    3.75
   2 -15   7   96.00    4.17
   2  15   7   93.30    3.99
   2 -15   7   94.16    4.17
   2  15   8    4.90    0.86
  -2  15  -8    6.31    0.87
   2 -15   8    6.85    0.95
   2 -15   8    6.10    0.92
   2 -15   8    4.33    0.84
  -2 -16   8    1.84    0.70
  -2  16   8    2.57    0.74
  -2 -16   8    1.46    0.71
  -2  16   7  115.74    4.85
  -2 -16   7  118.55    5.09
  -2 -16   7  114.97    4.42
  -2 -16   7  118.90    5.04
  -2 -16   7  111.67    4.59
  -2  16   6   41.01    3.06
  -2 -16   6   44.56    3.28
  -2 -16   6   46.82    3.02
  -2 -16   6   48.33    3.14
  -2 -16   6   50.07    3.34
  -2 -16   6   41.85    3.15
  -2  16   5  137.28    5.77
  -2 -16   5  142.48    5.52
  -2 -16   5  140.11    5.63
  -2 -16   5  156.24    6.15
  -2 -16   5  138.58    6.02
  -2  16   5  149.51    5.07
  -2  16   4  338.78    9.61
  -2 -16   4  356.37    9.38
  -2  16   4  348.24    8.84
  -2 -16   4  341.04    9.96
  -2 -16   4  357.91    9.86
  -2  16   3   12.62    1.75
  -2 -16   3   11.47    1.69
  -2 -16   3   12.36    1.70
  -2  16   3   11.81    1.53
  -2 -16   3   13.22    1.62
  -2 -16   3   12.57    1.82
  -2  16   2   89.96    4.19
  -2  16   2   92.37    4.32
  -2  16   2   88.32    4.04
  -2 -16   2   91.11    4.21
  -2 -16   2   93.05    4.46
  -2  16   2   97.76    4.10
  -2  16   1  187.54    6.09
  -2 -16   1  182.98    5.90
  -2  16   1  174.83    5.94
  -2 -16   1  175.09    6.06
  -2  16   1  179.99    6.17
  -2 -16   1  178.70    5.99
  -2  16   1  183.21    5.74
   2  16   0   83.98    4.09
  -2  16   0   70.77    3.70
  -2  16   0   79.53    3.83
  -2 -16   0   83.10    3.78
  -2 -16   0   75.80    3.55
  -2  16   0   80.28    3.55
   2 -16   0   77.05    3.92
   2 -16   1    7.61    1.39
  -2  16  -1    7.34    1.41
  -2  16  -1    6.70    1.22
   2  16   1   10.54    1.49
  -2 -16  -1    8.40    1.23
  -2  16  -1    8.36    1.34
   2  16   2    4.51    1.13
  -2  16  -2    3.38    1.11
   2 -16   2    4.11    1.07
  -2  16  -2    2.75    0.89
   2  16   2    5.57    1.20
  -2  16  -3  464.80   11.57
  -2  16  -3  458.12   11.34
   2  16   3  473.95   12.64
   2  16   3  474.51   11.59
   2 -16   3  481.20   11.34
   2 -16   3  439.82   12.19
   2 -16   3  479.85   11.43
   2 -16   3  439.59   11.14
   2  16   3  467.78   10.96
   2 -16   4    3.49    1.11
  -2  16  -4    5.58    1.27
   2 -16   4    3.54    1.05
   2 -16   4    5.01    1.06
   2  16   4    4.47    1.17
   2 -16   5   16.46    1.98
  -2  16  -5   17.15    1.95
   2 -16   5   17.08    2.00
   2 -16   5   16.77    1.98
   2 -16   5   12.49    1.80
   2  16   5   19.41    2.10
  -2  16  -6  176.26    6.07
   2  16   6  189.59    6.35
   2 -16   6  186.37    6.08
   2 -16   6  189.43    6.45
   2 -16   6  191.36    6.30
   2 -16   6  185.80    6.51
   2  16   7   56.00    2.90
   2 -16   7   55.99    2.97
   2 -16   7   53.91    3.01
  -2  16  -7   55.59    2.84
   2 -16   7   55.08    2.63
  -2  16  -8   63.72    2.45
   2  16   8   70.37    2.53
   2 -16   8   67.73    2.74
   2 -16   8   67.82    2.70
  -2  17   8   32.35    1.99
  -2 -17   8   31.58    2.03
  -2 -17   8   31.25    2.07
  -2 -17   7    0.92    0.56
  -2  17   7    1.17    0.76
  -2 -17   7    0.37    0.61
  -2 -17   7    0.30    0.69
  -2 -17   6   86.75    4.12
  -2  17   6   91.62    4.41
  -2 -17   6   89.35    4.50
  -2 -17   6   96.19    3.82
  -2 -17   6   86.31    4.49
  -2 -17   6   93.69    4.49
  -2 -17   6   94.92    4.36
  -2  17   5   68.45    3.86
  -2 -17   5   66.50    3.60
  -2 -17   5   65.19    3.73
  -2  17   5   69.91    3.29
  -2 -17   5   70.57    4.12
  -2 -17   5   73.29    4.05
  -2  17   4  128.69    4.87
  -2 -17   4  138.91    5.33
  -2 -17   4  126.22    5.58
  -2 -17   4  132.26    5.60
  -2  17   4  136.68    5.57
  -2 -17   3  872.38   17.28
  -2  17   3  843.53   17.61
  -2 -17   3  893.00   18.61
  -2 -17   3  859.29   18.02
  -2 -17   3  888.44   18.01
  -2  17   3  887.89   17.18
  -2  17   2    9.21    1.37
  -2  17   2    9.13    1.44
  -2  17   2    9.34    1.38
  -2 -17   2    9.27    1.53
  -2 -17   2    8.87    1.42
  -2  17   1    7.93    1.22
  -2 -17   1    9.49    1.45
  -2  17   1   11.49    1.56
  -2  17   1    7.81    1.30
  -2  17   1   10.15    1.48
  -2 -17   1    6.69    1.24
  -2 -17   1    6.97    1.35
  -2  17   0  106.85    4.59
  -2 -17   0  102.09    4.39
  -2  17   0  102.15    4.62
  -2  17   0  106.22    4.22
  -2  17  -1  316.70    9.08
   2  17   1  331.83    9.13
  -2  17  -1  298.85    8.56
   2 -17   1  310.52    9.26
  -2 -17  -1  334.18    8.44
  -2  17  -1  317.44    8.91
  -2  17  -2   93.30    4.54
   2  17   2   99.63    4.63
   2 -17   2   89.88    4.81
   2 -17   2   97.73    4.31
   2 -17   2   94.32    4.57
  -2  17  -2   87.41    4.32
   2  17   2   90.56    4.20
  -2  17  -3   25.73    2.40
   2  17   3   23.72    2.31
   2 -17   3   26.43    2.31
   2 -17   3   24.01    2.23
   2  17   3   19.44    1.93
  -2  17  -4   62.90    3.73
   2  17   4   63.80    3.75
   2 -17   4   67.55    3.77
   2 -17   4   67.37    3.42
   2 -17   4   68.32    3.86
  -2  17  -5  102.20    4.62
   2  17   5   99.97    4.64
   2 -17   5  104.48    4.86
   2 -17   5  106.26    4.75
   2 -17   5   99.31    4.55
  -2  17  -6  227.77    6.79
   2  17   6  225.28    6.87
   2 -17   6  228.92    6.68
   2 -17   6  229.69    7.02
   2 -17   6  232.28    6.94
   2 -17   6  228.80    7.16
   2  17   7   17.76    1.53
   2 -17   7   17.73    1.60
  -2  17  -7   18.79    1.54
  -2  17  -7   19.54    1.45
   2 -17   7   20.43    1.76
   2 -17   7   17.60    1.42
   2 -17   8    4.40    0.68
  -2 -18   8    3.01    0.66
  -2  18   8    4.70    0.80
  -2  18   7   36.74    2.37
  -2 -18   7   37.37    2.24
  -2 -18   7   33.49    2.35
  -2 -18   7   38.34    2.56
  -2 -18   6    0.30    0.79
  -2  18   6    1.42    0.77
  -2 -18   6   -0.18    0.65
  -2 -18   6    0.25    0.77
  -2 -18   6   -0.64    0.63
  -2 -18   6    0.63    0.74
  -2 -18   6    0.18    0.60
  -2  18   5  115.40    5.01
  -2  18   5  119.04    4.28
  -2 -18   5  119.45    5.22
  -2 -18   5  112.81    4.91
  -2 -18   5  113.33    5.06
  -2  18   4   27.05    2.44
  -2  18   4   27.72    2.13
  -2 -18   4   21.87    2.29
  -2 -18   4   20.47    1.97
  -2 -18   4   22.25    2.26
  -2  18   3  174.65    6.28
  -2 -18   3  180.85    6.54
  -2 -18   3  175.38    6.02
  -2  18   3  174.39    5.91
  -2  18   2  127.50    5.15
  -2  18   2  134.47    5.07
  -2 -18   2  123.83    5.20
  -2 -18   2  124.44    5.44
  -2  18   2  127.96    5.07
  -2  18   1    9.93    1.35
  -2  18   1    5.78    1.18
  -2  18   1    8.58    1.40
  -2  18   1   10.04    1.41
  -2 -18   1    6.53    1.30
  -2 -18   1    8.64    1.36
  -2  18   0    1.97    0.83
  -2  18   0    1.10    0.87
  -2 -18   0    2.04    0.82
  -2  18   0    1.41    0.78
   2 -18   1    6.08    1.46
   2  18   1    7.13    1.42
  -2  18  -1    8.23    1.45
  -2  18  -1    8.26    1.40
  -2  18  -2   72.95    4.07
   2  18   2   77.07    4.10
  -2  18  -2   72.17    3.88
   2  18   2   73.92    3.83
   2 -18   2   81.41    3.89
   2  18   3    3.57    0.95
  -2  18  -3    3.35    1.04
   2 -18   3    3.59    0.94
   2  18   3    2.90    1.05
  -2  18  -4    9.19    1.50
   2 -18   4   10.50    1.37
   2 -18   4   10.27    1.55
   2  18   4   11.84    1.73
   2 -18   4   10.33    1.50
   2 -18   4   12.28    1.72
  -2  18  -5  295.44    8.39
   2  18   5  294.37    8.39
   2 -18   5  311.42    8.50
   2 -18   5  307.06    8.50
   2 -18   5  311.24    8.82
   2  18   6   29.92    2.18
   2 -18   6   31.15    2.18
   2 -18   6   31.03    2.17
   2 -18   6   31.08    2.27
  -2  18  -6   30.68    2.18
   2 -18   6   31.17    2.36
  -2  18  -6   30.52    2.06
  -2  18  -7   19.53    1.45
   2  18   7   18.59    1.46
   2 -18   7   19.09    1.50
   2 -18   7   20.03    1.40
   2 -18   7   18.22    1.55
  -2  18  -7   20.52    1.40
  -2  19   7   15.63    1.44
  -2 -19   7   16.39    1.39
  -2 -19   7   15.11    1.44
  -2 -19   7   18.47    1.66
  -2 -19   6    7.31    1.18
  -2 -19   6    7.46    1.02
  -2 -19   6    7.72    1.19
  -2 -19   6    7.37    1.25
  -2  19   6    6.82    1.15
  -2 -19   6    7.94    1.32
  -2  19   5   -0.21    0.76
  -2  19   5    0.60    0.51
  -2 -19   5    0.47    0.73
  -2 -19   5    0.68    0.72
  -2 -19   5    0.69    0.85
  -2 -19   5    0.04    0.74
  -2  19   4   58.38    3.42
  -2 -19   4   54.56    3.41
  -2  19   4   53.24    2.92
  -2 -19   4   55.99    3.48
  -2 -19   4   57.42    3.20
  -2 -19   3   11.68    1.65
  -2 -19   3   11.41    1.52
  -2 -19   3   13.88    1.85
  -2  19   3   13.36    1.67
  -2  19   3   13.03    1.61
  -2  19   2  187.73    6.39
  -2  19   2  175.09    6.09
  -2  19   1    2.40    0.78
  -2  19   1    3.58    1.00
  -2  19   1    4.47    1.03
  -2  19   0  206.21    6.89
  -2  19   0  214.85    6.45
  -2  19  -1   19.61    2.08
   2  19   1   18.66    2.00
   2  19   2    3.26    0.94
   2 -19   2    2.38    0.93
   2  19   2    3.75    1.22
  -2  19  -2    5.34    1.17
  -2  19  -3   20.08    2.16
   2  19   3   21.81    2.18
  -2  19  -3   21.63    2.15
   2 -19   3   23.92    2.16
   2  19   3   21.65    2.03
  -2  19  -4   45.57    3.05
   2  19   4   45.60    3.04
  -2  19  -4   46.49    2.96
   2 -19   4   50.60    3.12
   2 -19   4   49.82    3.11
  -2  19  -5   17.55    1.77
   2  19   5   18.67    1.87
   2 -19   5   17.09    1.78
   2 -19   5   17.73    1.90
   2 -19   5   19.87    1.94
  -2  19  -5   17.32    1.75
  -2  19  -6    5.32    0.93
  -2  19  -6    3.51    0.76
   2 -19   6    2.95    0.76
   2 -19   6    3.77    0.91
   2 -19   6    4.13    0.90
   2 -19   6    5.34    0.92
   2  19   6    2.28    0.72
   2  19   7   54.64    2.21
   2 -19   7   51.78    2.40
   2 -19   7   47.91    1.94
   2 -19   7   53.70    2.45
  -2  19  -7   49.48    1.97
  -2  20   7   13.43    1.25
  -2 -20   7   11.68    1.14
  -2 -20   7   12.73    1.13
  -2 -20   7   14.80    1.37
  -2 -20   6    1.24    0.70
  -2 -20   6    2.99    0.77
  -2 -20   6    2.89    0.72
  -2 -20   6    2.80    0.76
  -2 -20   6    3.00    0.90
  -2  20   6    1.50    0.59
  -2 -20   5    0.43    0.62
  -2 -20   5    0.15    0.68
  -2 -20   5    0.44    0.84
  -2 -20   5   -0.15    0.71
  -2  20   5   -0.16    0.67
  -2  20   4  286.59    8.09
  -2 -20   4  286.61    7.57
  -2 -20   4  283.56    8.24
  -2 -20   4  272.29    7.99
  -2  20   4  293.06    7.39
  -2  20   3  719.83   15.07
  -2 -20   3  695.76   15.16
  -2  20   3  713.12   14.51
  -2 -20   3  721.81   14.51
  -2  20   2   24.41    2.24
  -2  20   2   28.14    2.31
  -2 -20   2   27.97    2.23
  -2  20   1    2.25    0.77
  -2  20   1    1.06    0.71
  -2  20   0  144.07    5.63
  -2  20   0  151.48    5.22
  -2  20  -1  501.63   11.93
   2  20   1  481.20   11.74
   2  20   2  135.72    5.53
  -2  20  -2  133.67    5.42
   2 -20   2  136.36    5.06
   2  20   2  140.80    5.38
   2  20   3   13.62    1.59
   2 -20   3   14.06    1.65
  -2  20  -3   12.54    1.62
   2  20   3   13.66    1.75
   2 -20   4   13.99    1.64
   2 -20   4   13.15    1.61
   2  20   4   18.22    1.93
   2 -20   4   13.43    1.73
  -2  20  -4   11.64    1.52
   2  20   5   21.88    1.90
  -2  20  -5   19.13    1.73
   2 -20   5   20.45    1.83
   2 -20   5   19.21    1.87
   2 -20   5   21.07    1.87
   2  20   6    0.43    0.50
  -2  20  -6   -0.19    0.47
   2 -20   6   -0.07    0.49
   2 -20   6   -0.36    0.51
   2 -20   6    0.03    0.45
   2 -20   7   14.55    1.14
   2 -20   7   13.21    1.08
  -2 -21   7   88.70    3.04
  -2  21   6   16.29    1.42
  -2 -21   6   16.39    1.44
  -2 -21   6   16.18    1.56
  -2 -21   6   16.56    1.40
  -2 -21   6   17.49    1.51
  -2 -21   6   16.83    1.24
  -2 -21   5   41.13    2.55
  -2 -21   5   33.82    2.23
  -2 -21   5   35.98    2.38
  -2 -21   5   37.05    2.57
  -2 -21   5   39.40    2.48
  -2  21   5   38.14    2.39
  -2 -21   4    4.43    0.95
  -2  21   4    2.84    0.91
  -2 -21   4    2.56    0.88
  -2  21   4    2.42    0.73
  -2 -21   4    4.22    0.98
  -2  21   3   45.12    2.87
  -2  21   3   43.83    2.64
  -2 -21   3   44.03    2.88
  -2  21   2    3.05    0.89
   2  21  -2    3.42    0.96
  -2  21   1  209.97    6.77
  -2  21   1  218.30    6.53
   2  21   0   12.52    1.60
  -2  21   0   17.42    1.91
  -2  21   0   18.47    1.71
  -2  21  -1   65.08    3.65
   2  21   1   63.19    3.56
  -2  21  -2  411.80   10.28
   2 -21   2  410.90    9.65
   2  21   2  403.84   10.09
   2  21   3   30.19    2.43
  -2  21  -3   28.03    2.31
   2 -21   3   26.37    2.07
   2 -21   3   31.04    2.37
   2  21   3   27.72    2.17
   2  21   4  129.54    4.81
   2 -21   4  117.47    4.44
   2 -21   4  109.07    4.54
   2 -21   4  119.26    4.58
  -2  21  -4  117.72    4.50
   2 -21   5    5.80    1.02
   2 -21   5    5.73    1.01
  -2  21  -5    5.74    0.96
   2 -21   5    5.17    0.85
   2 -21   5    5.79    0.96
   2  21   5    5.63    1.00
   2 -21   5    3.25    0.85
   2  21   6  106.03    3.39
   2 -21   6  106.26    3.36
   2 -21   6  102.99    3.60
  -2  21  -6  101.43    3.20
   2 -21   6  110.14    3.54
  -2  22   6   59.21    2.39
  -2 -22   6   59.19    2.65
  -2 -22   6   54.49    2.40
  -2  22   5   33.73    2.06
  -2 -22   5   33.30    2.14
  -2 -22   5   33.31    2.15
  -2 -22   5   34.44    2.27
  -2  22   4   56.32    2.52
  -2 -22   4   58.39    3.01
  -2 -22   4   59.61    3.10
  -2  22   4   61.64    3.03
  -2 -22   4   53.38    3.07
  -2  22   3   83.55    3.49
   2  22  -3   84.40    3.63
  -2  22   3   90.01    3.88
  -2 -22   3   80.45    3.72
   2  22  -2    0.84    0.59
  -2 -22   2    0.82    0.71
  -2  22   2    1.49    0.75
  -2  22   1   31.69    2.40
  -2  22   0  202.66    6.52
  -2  22   0  206.54    5.95
   2  22   0  185.31    6.42
  -2  22  -1   87.93    4.09
   2  22   1   80.53    3.93
   2 -22   2  110.92    4.42
  -2  22  -2  122.85    4.82
   2  22   2  113.29    4.55
   2 -22   3   85.44    3.58
   2 -22   3   91.79    3.92
   2 -22   3   90.54    3.92
  -2  22  -3   89.17    3.91
   2 -22   4  139.69    4.63
   2 -22   4  144.30    4.93
   2 -22   4  152.17    4.94
  -2  22  -4  151.62    4.90
  -2  22  -5   72.55    2.90
   2 -22   5   77.31    3.09
   2 -22   5   72.92    2.99
   2 -22   5   72.74    3.11
   2 -22   5   71.37    2.58
   2 -22   6    0.70    0.42
   2 -22   6   -0.13    0.38
  -2 -23   5    1.42    0.55
   2  23  -5    0.75    0.45
  -2 -23   5    1.47    0.51
  -2 -23   5    1.41    0.49
  -2 -23   5    2.05    0.66
  -2 -23   4    7.08    1.00
   2  23  -4    6.22    0.90
  -2 -23   4    5.85    1.05
  -2 -23   4    8.34    1.13
   2  23  -3   66.06    2.93
  -2 -23   3   59.34    3.10
  -2 -23   3   59.23    2.93
  -2  23   3   61.24    2.73
  -2 -23   2   47.90    2.65
  -2  23   2   46.65    2.60
   2  23  -1    7.02    1.26
  -2 -23   1    5.10    0.95
  -2  23   1    4.19    0.90
  -2  23   0   23.56    2.00
   2  23   0   24.17    2.10
   2  23   1   21.62    1.94
  -2  23  -1   23.47    2.00
   2 -23   2  132.22    4.49
  -2  23  -2  131.06    4.78
   2  23   2  123.11    4.55
  -2  23  -3   41.46    2.46
   2 -23   3   33.88    2.01
   2 -23   3   36.66    2.30
   2 -23   3   41.97    2.42
  -2  23  -4    3.38    0.76
   2 -23   4    2.45    0.72
   2 -23   4    3.42    0.74
   2 -23   4    3.90    0.87
   2 -23   5  111.11    3.46
   2 -23   5  112.19    3.48
   2 -23   5  118.62    3.57
   2 -23   5  112.68    3.56
  -2  23  -5  116.49    3.43
  -2 -24   5    0.18    0.42
  -2 -24   5    0.88    0.39
   2  24  -4   30.49    1.77
  -2 -24   4   30.32    1.86
  -2 -24   4   32.28    1.89
   2  24  -4   29.78    1.67
  -2 -24   4   31.83    1.93
   2  24  -3   12.87    1.34
   2  24  -3   12.36    1.15
  -2  24   3   11.46    1.07
  -2 -24   3   10.23    1.16
  -2 -24   3   11.52    1.18
  -2 -24   3   12.55    1.31
   2  24  -2   54.37    2.88
  -2 -24   2   53.60    2.66
  -2  24   2   56.78    2.64
   2  24  -1    0.65    0.58
  -2  24   1   -0.15    0.51
  -2  24   0   48.90    2.69
   2  24   0   47.36    2.75
   2  24   1    1.59    0.73
  -2  24  -1    2.02    0.74
  -2  24  -2  122.50    4.30
   2 -24   2  114.90    4.03
   2  24   2  122.77    4.25
  -2  24  -3   14.36    1.34
   2 -24   3   13.54    1.28
   2 -24   3   12.27    1.21
   2 -24   4   49.10    2.24
   2 -24   4   51.24    2.13
   2 -24   4   52.23    2.33
  -2  24  -4   51.70    2.28
   2 -24   4   48.68    2.19
   2  25  -4    0.32    0.36
  -2 -25   4    0.25    0.36
  -2 -25   4    0.61    0.43
  -2 -25   4    1.48    0.48
  -2 -25   3   37.37    1.97
  -2 -25   3   33.68    1.78
   2  25  -3   35.74    1.94
   2  25  -2   -0.27    0.51
  -2 -25   2   -0.14    0.50
  -2  25   2    0.38    0.44
   2  25  -1    7.51    1.03
  -2  25   1    7.12    0.96
   2  25   0    1.99    0.67
  -2  25   0    3.03    0.76
   2 -25   1  141.02    4.12
  -2  25  -1  140.62    4.45
   2  25   1  139.14    4.44
   2 -25   2    2.04    0.59
  -2  25  -2    1.23    0.53
  -2  25  -3    5.56    0.81
   2 -25   3    6.34    0.83
   2 -25   3    6.85    0.84
  -2  25  -4    0.95    0.42
   2 -25   4    2.06    0.47
  -2 -26   3   51.07    2.07
  -2 -26   3   54.44    2.06
   2  26  -3   56.37    2.10
  -2 -26   2   55.54    2.22
   2  26  -2   54.07    2.31
   2  26  -1    2.18    0.62
  -2  26   1    2.64    0.61
   2  26   0    5.85    0.85
  -2  26   0    6.78    0.86
   2 -26   1    1.48    0.49
   2 -26   1    0.29    0.39
  -2  26  -2    1.51    0.53
   2 -26   2    2.01    0.53
   2 -26   2    1.06    0.46
   2  27  -1    1.96    0.50
  -3   0  10    5.40    1.09
  -3   0   9    0.44    0.87
  -3   0   9    0.71    1.02
  -3   0   8   27.24    2.30
  -3   0   8   28.22    2.87
  -3   0   7   -0.53    0.73
  -3   0   7    0.00    0.61
  -3   0   6  382.19    9.29
  -3   0   6  395.65   10.79
  -3   0   5    2.24    0.84
  -3   0   4 1688.65   25.85
  -3   0   4 1602.75   26.63
  -3   0   3    1.70    0.46
  -3   0   2   30.02    1.55
  -3   0   1   -0.23    0.40
   3   0  -1    0.17    0.11
  -3   0   0 1208.15   19.38
  -3   0  -1    0.24    0.40
  -3   0  -2 2965.06   44.48
  -3   0  -3    5.12    0.82
   3   0   3    0.08    0.30
  -3   0  -4  365.43    8.77
  -3   0  -5    1.52    0.84
   3   0   6  178.44    6.59
  -3   0  -6  183.45    6.68
   3   0   7   -0.04    0.90
   3   0   7   -0.41    0.77
   3   0   8   12.53    1.86
   3   0   8   14.08    1.91
   3   0   9    0.63    0.71
   3   0   9   -0.37    0.69
   3   0  10   16.45    1.36
   3   0  10   17.54    1.42
  -3  -1  10    7.25    1.24
  -3   1  10    9.37    1.33
  -3  -1   9    6.53    1.51
  -3   1   9    8.96    1.80
  -3   1   9    6.72    1.52
  -3  -1   9    5.41    1.47
  -3   1   8   53.85    3.20
  -3   1   8   57.58    3.84
  -3  -1   8   57.66    4.01
  -3   1   8   52.96    3.91
  -3  -1   7   89.11    4.90
  -3   1   7   85.35    4.01
  -3   1   7   86.74    4.89
  -3  -1   7   80.01    3.92
  -3  -1   6   33.99    2.33
  -3   1   6   33.43    2.33
  -3   1   6   30.73    2.71
  -3  -1   6   34.38    2.92
  -3   1   6   36.38    2.55
  -3   1   5 1763.71   30.07
  -3  -1   5 1868.43   29.78
  -3  -1   4  153.09    4.59
  -3   1   4  154.73    4.82
  -3   1   4  160.78    4.13
  -3  -1   4  159.98    4.31
  -3  -1   3  101.71    3.17
  -3   1   3  103.58    3.11
  -3   1   2  356.36    6.48
  -3  -1   2  369.81    7.25
  -3   1   2  365.26    7.18
  -3   1   1 1724.90   25.43
  -3   1   1 1693.10   26.47
   3   1  -1 1729.32   24.79
  -3  -1   1 1657.91   26.42
  -3  -1   1 1732.96   24.86
  -3  -1   0  115.96    3.37
  -3   1   0  114.45    3.40
  -3   1  -1  245.94    5.71
  -3  -1  -1  243.21    5.61
  -3  -1  -2  347.53    7.33
  -3   1  -2  323.99    7.00
   3  -1   3  335.95    7.19
  -3  -1  -3  347.62    7.93
   3   1   3  346.82    6.75
   3  -1   4  154.77    4.46
  -3  -1  -4  152.93    5.18
  -3   1  -4  152.72    5.05
   3   1   5  296.37    8.37
  -3  -1  -5  288.14    8.20
  -3   1  -5  297.30    8.20
  -3   1  -6  148.35    5.97
   3   1   6  158.25    6.18
   3  -1   6  152.44    6.00
   3   1   6  154.22    6.26
  -3  -1  -6  159.12    6.19
   3   1   7   -0.76    0.93
   3  -1   7    0.47    0.99
   3   1   7   -0.14    0.83
   3  -1   7    0.24    0.86
   3   1   8    2.07    1.07
   3  -1   8    3.82    1.16
   3   1   8    4.30    1.26
   3  -1   8    2.55    1.08
   3   1   9   32.43    2.42
   3  -1   9   33.65    2.45
   3   1   9   32.52    2.49
   3  -1   9   31.48    2.45
   3   1  10   24.86    1.64
   3  -1  10   28.76    1.75
   3  -1  10   23.15    1.63
  -3   2  10   48.13    2.83
  -3  -2  10   44.72    2.73
  -3   2   9  631.38   14.48
  -3   2   9  609.41   14.85
  -3  -2   9  643.46   14.62
  -3  -2   9  625.92   14.80
  -3  -2   8   94.39    4.50
  -3   2   8   91.81    4.22
  -3  -2   8   93.38    5.16
  -3   2   8  103.00    5.19
  -3   2   8   88.52    5.05
  -3  -2   7   18.99    2.30
  -3   2   7   16.67    1.74
  -3  -2   7   20.28    2.09
  -3   2   7   14.51    2.03
  -3  -2   7   16.54    1.81
  -3  -2   6   75.03    3.59
  -3   2   6   74.66    3.53
  -3  -2   6   80.09    4.38
  -3   2   6   81.29    3.97
  -3   2   6   76.74    4.28
  -3   2   5  660.94   13.97
  -3  -2   5  685.61   13.28
  -3  -2   4  147.08    4.18
  -3   2   4  143.31    4.68
  -3  -2   4  142.58    4.26
  -3  -2   3  970.91   16.13
  -3   2   3  963.66   15.81
  -3   2   3  954.62   16.63
  -3  -2   2  757.79   12.78
  -3   2   2  726.83   12.58
  -3   2   2  729.39   12.05
   3   2  -1  726.74   11.00
  -3  -2   1  700.90   12.36
  -3   2   1  717.22   12.39
  -3   2   1  715.54   11.60
  -3  -2   0  242.73    5.44
  -3   2   0  240.45    5.58
  -3  -2  -1 2233.34   33.35
  -3   2  -1 2213.44   32.58
  -3  -2  -2  657.97   12.16
  -3   2  -2  693.81   12.00
  -3   2  -3  125.96    4.02
  -3  -2  -3  128.73    4.34
   3  -2   3  118.43    3.82
   3  -2   4   14.94    1.35
  -3  -2  -4   14.09    1.55
  -3   2  -4   13.39    1.43
   3   2   5  272.52    8.07
   3  -2   5  266.07    7.86
   3   2   5  282.38    8.32
  -3  -2  -5  297.70    8.30
  -3   2  -5  279.79    7.89
  -3   2  -6 1070.81   20.72
   3   2   6 1053.94   20.82
   3  -2   6 1018.35   20.44
   3   2   6 1001.21   20.85
  -3  -2  -6 1059.76   20.87
   3   2   7    4.66    1.31
   3  -2   7    6.45    1.40
   3   2   7    4.80    1.39
   3   2   8   -0.39    0.81
   3  -2   8    0.30    0.76
   3  -2   8    1.10    1.02
   3   2   8   -0.18    0.86
   3   2   9    5.03    1.15
   3   2   9    6.31    1.21
   3  -2   9    5.32    1.10
   3  -2   9    6.02    1.21
   3   2  10    1.26    0.54
   3  -2  10    0.41    0.51
   3  -2  10   -0.05    0.49
  -3  -3  10   10.55    1.38
  -3   3  10   12.15    1.46
  -3   3   9   75.87    4.16
  -3  -3   9   80.59    4.42
  -3   3   9   73.59    4.35
  -3   3   8   38.06    3.10
  -3   3   8   36.31    3.24
  -3  -3   8   37.27    3.19
  -3   3   8   35.46    2.57
  -3  -3   8   37.12    2.86
  -3   3   7    9.83    1.62
  -3   3   7   10.94    1.85
  -3  -3   7   13.89    1.83
  -3  -3   7   12.50    1.93
  -3   3   7   10.46    1.41
  -3   3   6  122.15    5.53
  -3  -3   6  120.71    4.69
  -3   3   6  125.05    4.65
  -3  -3   6  123.44    5.08
  -3   3   6  129.08    5.26
  -3  -3   6  128.16    5.59
  -3  -3   5   14.47    1.30
  -3   3   5   16.18    1.69
  -3   3   4   38.94    2.36
  -3  -3   4   36.98    1.99
  -3  -3   4   35.78    1.93
  -3  -3   4   41.68    2.20
  -3  -3   3   67.48    2.63
  -3   3   3   65.14    2.34
  -3  -3   3   68.06    2.61
  -3   3   3   61.86    2.76
  -3   3   2  110.12    3.25
  -3  -3   2  109.80    3.36
  -3  -3   2  110.06    3.25
  -3   3   2  114.39    3.08
  -3   3   1   56.18    1.93
  -3   3   1   54.77    2.20
   3   3  -1   54.58    1.61
  -3  -3   1   52.92    2.17
   3   3   0   18.13    1.05
  -3  -3   0   19.54    1.30
  -3   3   0   19.16    1.34
  -3  -3  -1  104.06    3.26
  -3   3  -1  101.50    2.75
  -3  -3  -2  324.64    7.03
  -3   3  -2  327.21    6.73
  -3  -3  -3  103.11    3.91
   3  -3   3  106.15    3.67
  -3   3  -3   98.68    3.46
   3  -3   4   46.94    2.52
  -3  -3  -4   43.14    2.72
  -3   3  -4   47.42    2.61
  -3   3  -5  345.75    9.00
   3   3   5  351.91    9.46
   3  -3   5  352.59    9.19
   3   3   5  346.13    9.57
  -3  -3  -5  343.04    9.34
  -3   3  -6 1668.50   29.86
   3   3   6 1696.91   30.28
   3  -3   6 1718.88   30.02
  -3  -3  -6 1644.80   30.12
   3   3   6 1697.25   30.54
   3   3   7  224.78    7.88
   3  -3   7  232.20    7.78
   3   3   7  229.95    8.12
   3   3   8   46.95    3.29
   3  -3   8   39.12    2.96
   3   3   8   44.40    3.29
   3  -3   8   39.57    3.09
   3  -3   9   -0.34    0.68
   3  -3   9    0.94    0.69
   3   3   9    0.45    0.75
   3   3   9    0.11    0.61
   3   3  10    0.48    0.45
   3  -3  10    0.53    0.49
   3  -3  10    0.62    0.49
  -3  -4  10    0.15    0.61
  -3   4  10   -0.19    0.67
  -3  -4   9    2.05    0.98
  -3   4   9    3.24    1.17
  -3   4   8   84.30    4.90
  -3   4   8   92.94    4.91
  -3  -4   8   89.45    4.93
  -3  -4   8   88.59    4.52
  -3   4   8   90.11    4.10
  -3   4   7  125.69    5.70
  -3  -4   7  125.35    5.85
  -3   4   7  118.19    5.79
  -3  -4   7  124.79    5.43
  -3   4   7  117.91    4.79
  -3   4   6  300.78    8.82
  -3  -4   6  293.19    9.03
  -3  -4   6  299.54    8.59
  -3  -4   6  291.90    7.98
  -3   4   6  295.34    8.68
  -3  -4   6  270.34    7.71
  -3   4   6  289.21    7.74
  -3   4   6  290.57    9.07
  -3  -4   5   24.66    1.77
  -3   4   5   22.32    2.03
  -3  -4   5   23.13    1.83
  -3  -4   4  211.78    5.65
  -3  -4   4  209.49    5.52
  -3  -4   4  207.71    5.18
  -3   4   4  203.31    6.10
  -3  -4   3  189.37    4.92
  -3  -4   3  182.41    4.83
  -3   4   3  182.84    5.22
  -3   4   3  180.05    4.39
  -3  -4   2 1646.96   25.35
  -3  -4   2 1642.03   25.60
  -3   4   2 1624.18   25.22
  -3   4   2 1598.34   25.07
  -3   4   1  544.56    9.65
   3   4  -1  565.28    9.16
  -3  -4   1  560.38   10.17
  -3  -4   1  547.25    9.66
  -3  -4   0  208.02    5.00
   3   4   0  199.69    4.52
  -3   4   0  205.69    3.69
  -3  -4  -1   73.14    2.67
   3   4   1   70.07    2.56
  -3   4  -1   71.68    2.13
  -3  -4  -2    2.05    0.56
  -3   4  -2    2.20    0.49
  -3  -4  -3 2766.00   42.48
   3  -4   3 2664.47   41.82
  -3   4  -3 2719.93   41.31
  -3  -4  -4 1248.02   21.90
  -3   4  -4 1211.18   20.96
  -3   4  -5   19.69    1.90
   3   4   5   20.22    2.05
   3  -4   5   18.99    1.88
   3   4   5   20.81    2.11
   3  -4   5   19.20    1.89
  -3  -4  -5   20.94    2.08
   3  -4   6  655.84   13.73
  -3   4  -6  631.01   14.41
   3   4   6  638.44   14.80
   3  -4   6  643.91   14.46
   3   4   6  634.83   15.00
   3   4   6  644.59   15.15
   3  -4   6  638.52   13.92
  -3  -4  -6  634.50   14.77
   3   4   7  249.96    8.39
   3  -4   7  251.69    8.14
   3   4   7  247.95    8.51
   3   4   8  130.49    5.60
   3  -4   8  134.54    5.53
   3   4   8  133.40    5.73
   3  -4   8  136.54    5.72
   3   4   9   84.36    3.87
   3  -4   9   80.80    3.73
   3   4   9   85.10    3.92
   3  -4   9   82.05    3.87
   3   4  10   -0.03    0.39
   3  -4  10    0.64    0.47
   3  -4  10    0.64    0.50
  -3   5  10  129.45    4.56
  -3  -5  10  125.24    4.58
  -3   5   9   13.34    1.76
  -3  -5   9   13.24    1.76
  -3   5   8   77.31    4.43
  -3   5   8   70.69    4.44
  -3  -5   8   74.45    4.16
  -3   5   8   74.34    3.68
  -3  -5   8   68.58    4.27
  -3   5   7  241.00    7.24
  -3  -5   7  259.02    8.71
  -3  -5   7  261.48    8.32
  -3   5   7  253.37    8.47
  -3   5   7  244.54    8.65
  -3   5   6   70.72    3.46
  -3  -5   6   69.90    4.11
  -3  -5   6   66.11    3.82
  -3  -5   6   68.05    3.57
  -3   5   6   72.65    4.07
  -3   5   6   75.93    4.29
  -3   5   6   69.19    3.97
  -3  -5   5   -0.34    0.59
  -3   5   5    1.11    0.69
  -3  -5   5    1.20    0.57
  -3  -5   4  444.11    9.41
  -3  -5   4  455.97    9.59
  -3   5   4  443.51   10.25
  -3  -5   3  103.93    3.53
  -3  -5   3  105.20    3.48
  -3  -5   2 1012.19   16.94
  -3  -5   2 1019.64   17.29
  -3   5   2 1044.62   16.97
  -3   5   2 1039.91   17.65
  -3  -5   1  499.63    9.11
  -3   5   1  513.24    9.31
   3   5  -1  509.97    8.86
  -3  -5   1  509.75    9.68
  -3  -5   0   14.41    1.19
  -3  -5   0   13.71    0.90
   3   5   0   13.87    1.06
   3   5   1  373.17    7.74
  -3   5  -1  373.67    6.70
  -3   5  -2  528.68    9.67
   3   5   2  540.08   10.63
  -3  -5  -2  546.48   10.25
   3  -5   2  537.67   10.82
   3   5   3   17.24    1.59
  -3  -5  -3   19.31    1.39
   3  -5   3   18.13    1.62
  -3   5  -3   17.34    1.38
  -3   5  -4  479.30   10.36
   3  -5   4  465.23   10.64
   3   5   4  500.94   11.29
  -3  -5  -4  481.17   11.16
  -3  -5  -5   18.55    2.00
   3   5   5   19.23    2.08
   3  -5   5   17.72    1.85
   3  -5   5   18.71    1.74
   3  -5   5   18.12    1.78
   3   5   5   20.73    2.18
  -3   5  -5   15.82    1.73
   3  -5   5   18.39    1.87
   3   5   5   16.88    1.97
  -3  -5  -6  257.42    8.44
  -3   5  -6  256.07    8.12
   3   5   6  273.76    8.67
   3  -5   6  279.82    8.38
   3   5   6  266.99    8.79
   3  -5   6  265.99    7.96
   3   5   6  266.46    8.72
   3  -5   6  271.30    7.46
   3  -5   6  264.53    7.75
   3   5   7   79.51    4.50
   3  -5   7   83.58    4.42
   3   5   7   85.99    4.77
   3   5   8   47.01    3.25
   3  -5   8   45.02    3.08
   3   5   8   42.91    3.17
   3  -5   8   46.21    3.24
   3   5   9    7.17    1.21
   3  -5   9    7.10    1.14
   3  -5   9    6.88    1.21
   3   5   9    8.12    1.17
   3  -5  10    1.14    0.50
   3  -5  10   -0.04    0.44
  -3   6  10   55.11    2.80
  -3  -6  10   51.17    2.76
  -3   6   9   86.16    4.30
  -3  -6   9   81.93    4.14
  -3   6   8   55.02    3.94
  -3  -6   8   59.82    3.86
  -3  -6   8   56.32    3.65
  -3   6   8   55.48    3.73
  -3   6   8   54.74    3.10
  -3   6   7  109.55    5.53
  -3  -6   7  113.74    5.30
  -3   6   7  105.21    5.21
  -3   6   7  108.07    4.53
  -3  -6   7  113.11    5.46
  -3  -6   6    2.19    1.01
  -3  -6   6    3.34    0.88
  -3  -6   6    3.42    1.14
  -3   6   6    3.64    0.95
  -3   6   6    4.44    1.17
  -3   6   6    5.09    1.24
  -3  -6   6    5.48    1.13
  -3  -6   6    4.63    1.11
  -3   6   6    5.59    1.38
  -3  -6   5  230.78    6.51
  -3  -6   5  242.96    6.78
  -3   6   5  241.71    7.56
  -3  -6   4   63.59    2.96
  -3  -6   4   65.46    2.99
  -3   6   4   62.66    3.30
  -3  -6   3  148.67    4.52
  -3   6   3  140.83    4.76
  -3  -6   3  147.21    4.36
  -3  -6   2  222.40    5.62
  -3  -6   2  222.04    5.31
  -3   6   2  222.99    5.79
  -3   6   2  219.16    5.38
  -3   6   1  233.27    5.38
   3   6  -1  228.54    5.03
  -3  -6   1  229.48    5.58
  -3  -6   1  227.42    5.13
  -3  -6   0   78.90    2.40
  -3  -6   0   80.65    2.89
   3   6   0   82.23    2.79
  -3   6   0   76.42    2.67
  -3   6  -1   66.69    1.91
   3   6   1   68.29    2.70
  -3  -6  -1   70.05    2.68
  -3  -6  -2    0.15    0.38
   3   6   2   -0.33    0.48
  -3   6  -2    1.36    0.43
   3  -6   2    0.33    0.47
  -3   6  -3  194.59    5.19
   3   6   3  197.55    5.95
  -3  -6  -3  208.84    5.19
   3  -6   3  193.27    5.88
  -3   6  -4   60.14    2.94
   3  -6   4   56.72    3.15
   3   6   4   63.38    3.43
  -3  -6  -4   59.68    3.35
   3  -6   5  161.75    5.67
  -3   6  -5  155.98    5.60
   3   6   5  160.08    6.13
   3  -6   5  159.66    5.76
   3  -6   5  160.73    5.44
   3   6   5  161.58    6.24
   3  -6   5  161.80    5.80
   3   6   5  156.90    6.18
   3  -6   5  164.29    5.82
  -3  -6  -5  161.10    6.11
  -3   6  -6  559.47   13.32
   3   6   6  582.60   14.07
   3  -6   6  596.71   13.60
   3   6   6  579.25   14.31
   3  -6   6  567.32   13.18
   3   6   6  574.18   14.15
   3  -6   6  583.29   12.55
  -3  -6  -6  582.30   13.97
   3   6   7    0.49    0.79
   3  -6   7    0.55    0.76
   3   6   7    1.06    0.77
   3   6   8   58.48    3.61
   3  -6   8   58.14    3.47
   3   6   8   54.66    3.51
   3  -6   9    0.34    0.62
   3   6   9    0.60    0.59
   3  -6   9    0.01    0.59
   3   6   9    0.59    0.59
  -3   7  10   80.71    3.31
  -3  -7  10   79.30    3.38
  -3   7   9    0.74    0.48
  -3   7   9    0.43    0.82
  -3  -7   9    0.71    0.63
  -3  -7   9    1.61    0.89
  -3  -7   8   76.92    3.78
  -3   7   8   75.21    4.29
  -3   7   8   73.35    3.56
  -3  -7   8   78.27    4.31
  -3  -7   8   71.20    4.17
  -3   7   8   72.19    4.37
  -3   7   7   32.75    2.88
  -3   7   7   36.79    2.54
  -3  -7   7   37.86    3.07
  -3   7   7   34.61    3.04
  -3  -7   7   35.11    2.98
  -3   7   6    7.37    1.43
  -3  -7   6    5.45    1.38
  -3  -7   6    5.48    1.21
  -3  -7   6    9.56    1.39
  -3   7   6    7.49    1.50
  -3  -7   6    6.62    1.17
  -3   7   6   12.06    1.50
  -3  -7   6    6.53    1.41
  -3   7   6    7.42    1.49
  -3   7   5   -0.36    0.54
  -3  -7   5    0.23    0.61
  -3  -7   5    0.20    0.56
  -3  -7   5   -0.04    0.55
  -3   7   5    0.25    0.63
  -3  -7   5    0.87    0.59
  -3  -7   4   45.30    2.54
  -3  -7   4   47.06    2.55
  -3   7   4   48.07    2.97
  -3  -7   3  191.93    5.23
  -3   7   3  183.51    5.70
  -3  -7   3  183.95    5.34
  -3  -7   2 2134.77   33.27
  -3   7   2 2085.98   33.52
  -3   7   2 2114.43   32.91
  -3  -7   2 2156.42   32.77
  -3   7   1   81.32    2.95
  -3  -7   1   86.11    2.80
  -3  -7   1   81.91    3.08
   3   7  -1   88.99    2.88
  -3   7   1   82.63    3.11
   3   7   0  515.17    9.81
  -3  -7   0  502.56    8.98
  -3  -7   0  503.02    9.85
  -3   7   0  510.70    9.69
  -3  -7  -1  486.66    9.52
   3   7   1  475.90    9.71
  -3   7  -2   73.94    2.48
  -3  -7  -2   69.74    2.77
   3  -7   2   69.80    3.22
   3   7   2   69.40    3.12
   3  -7   3   32.11    2.27
  -3   7  -3   36.42    1.99
   3   7   3   35.95    2.43
   3  -7   4    4.60    0.99
  -3  -7  -4    2.31    0.95
  -3   7  -4    2.08    0.64
   3   7   4    4.81    1.11
  -3   7  -5  102.68    4.41
   3   7   5  109.69    5.05
   3  -7   5  105.90    4.64
   3   7   5   96.76    4.83
   3  -7   5  108.64    4.15
   3  -7   5  105.35    4.71
   3   7   5  105.99    5.05
   3  -7   5  110.33    4.44
   3  -7   5   99.46    4.41
   3  -7   5  101.03    4.56
  -3  -7  -5   96.38    4.76
  -3   7  -6  711.74   15.73
   3   7   6  749.84   16.66
   3  -7   6  737.02   15.87
   3  -7   6  754.80   15.03
   3   7   6  730.54   16.68
   3  -7   6  727.68   15.66
  -3  -7  -6  707.28   16.25
   3   7   7    6.45    1.49
   3  -7   7    3.18    1.09
   3   7   7    3.92    1.22
   3  -7   7    3.97    1.07
   3   7   8    0.33    0.76
   3  -7   8    0.69    0.78
   3   7   9    0.53    0.65
   3  -7   9    0.40    0.55
   3   7   9    0.01    0.53
   3  -7   9    0.19    0.53
  -3   8  10   39.44    2.19
  -3  -8  10   39.08    2.27
  -3   8   9   81.34    3.96
  -3  -8   9   75.85    3.78
  -3   8   9   77.39    3.11
  -3  -8   8   12.81    1.84
  -3  -8   8   14.38    1.70
  -3   8   8   12.66    1.84
  -3   8   8   12.43    1.45
  -3  -8   8   11.44    1.68
  -3   8   7   -0.11    0.86
  -3   8   7    1.20    0.91
  -3  -8   7    0.93    0.86
  -3   8   7    1.50    0.82
  -3  -8   7    1.05    0.67
  -3  -8   7    2.19    0.98
  -3   8   6  325.80    9.54
  -3  -8   6  332.77    9.80
  -3   8   6  325.03    8.52
  -3  -8   6  334.81    9.69
  -3   8   6  334.22   10.00
  -3  -8   6  348.83    9.02
  -3  -8   6  327.66    8.65
  -3  -8   6  349.38    9.17
  -3  -8   6  326.33    9.17
  -3   8   6  317.73    9.67
  -3  -8   5   14.20    1.75
  -3  -8   5   13.77    1.58
  -3   8   5   13.74    1.46
  -3  -8   5   14.16    1.88
  -3  -8   5   14.32    1.58
  -3   8   5   11.81    1.62
  -3   8   5   13.94    1.83
  -3  -8   5   14.59    1.66
  -3  -8   5   15.32    1.64
  -3  -8   4    2.38    0.68
  -3  -8   4    3.63    0.93
  -3   8   3  308.16    7.43
  -3  -8   3  315.74    7.71
  -3  -8   3  325.27    7.47
  -3   8   2  212.36    5.56
  -3  -8   2  198.80    5.25
  -3   8   2  204.38    5.84
  -3  -8   2  205.43    5.64
  -3   8   1   33.35    1.89
  -3  -8   1   31.93    1.70
  -3   8   1   32.84    1.96
  -3  -8   1   36.81    2.06
  -3   8   0  132.19    4.02
  -3  -8   0  134.28    3.50
   3   8   0  132.01    4.12
  -3  -8   0  132.65    4.09
  -3  -8  -1    5.71    0.83
   3   8   1    5.23    0.87
   3   8   2  389.01    9.04
   3  -8   2  393.76    9.30
  -3  -8  -2  388.97    8.24
   3  -8   3  263.34    7.49
  -3   8  -3  267.78    6.35
   3   8   3  254.56    7.37
  -3   8  -4  124.91    4.48
   3   8   4  119.29    5.09
   3  -8   4  125.53    5.10
   3   8   4  119.65    5.11
   3  -8   4  119.24    4.64
   3  -8   4  121.36    4.87
   3   8   4  127.63    5.24
   3  -8   4  115.39    4.64
  -3  -8  -4  120.04    5.06
   3   8   5   79.31    4.33
  -3   8  -5   76.02    3.79
   3  -8   5   73.14    3.89
   3  -8   5   80.99    4.26
   3  -8   5   84.00    3.67
   3  -8   5   84.47    3.92
   3  -8   5   83.47    4.02
   3   8   5   83.44    4.53
   3  -8   5   88.51    4.27
   3   8   5   84.98    4.54
  -3  -8  -5   78.39    4.26
   3   8   6   10.97    1.78
   3  -8   6   10.85    1.69
   3  -8   6    9.33    1.36
   3  -8   6   10.49    1.58
   3   8   6   10.59    1.77
   3  -8   7  154.42    5.77
   3   8   7  154.76    6.35
   3  -8   7  154.07    5.98
   3  -8   7  160.62    5.73
   3   8   8    3.26    1.09
   3  -8   8    2.50    0.95
   3   8   8    1.95    0.72
   3  -8   9   38.53    2.29
   3   8   9   38.17    2.03
   3  -8   9   36.78    2.30
  -3  -9  10   11.06    1.19
  -3   9  10   10.50    1.11
  -3   9   9   27.78    2.25
  -3  -9   9   23.56    2.09
  -3   9   8   47.36    3.33
  -3   9   8   46.82    2.70
  -3  -9   8   48.92    3.37
  -3   9   7   23.10    2.42
  -3   9   7   21.74    2.39
  -3  -9   7   21.99    2.44
  -3  -9   7   22.42    2.13
  -3   9   7   23.22    2.01
  -3   9   6   12.38    1.52
  -3   9   6   13.33    1.82
  -3  -9   6   14.37    1.99
  -3  -9   6   11.12    1.55
  -3  -9   6   13.30    1.76
  -3   9   6   12.73    1.86
  -3  -9   6   17.00    1.87
  -3   9   6   14.42    2.05
  -3  -9   6   11.49    1.67
  -3   9   5  183.32    6.48
  -3   9   5  198.76    6.03
  -3  -9   5  182.06    6.80
  -3  -9   5  193.44    6.46
  -3  -9   5  189.55    5.99
  -3  -9   5  200.73    6.34
  -3   9   5  180.40    6.90
  -3  -9   5  193.04    6.31
  -3  -9   5  189.95    6.41
  -3  -9   4  140.11    4.87
  -3  -9   4  143.06    5.10
  -3   9   4  133.78    5.48
  -3   9   3  293.20    7.36
  -3  -9   3  288.91    7.53
  -3  -9   3  283.03    7.14
  -3   9   3  290.94    8.01
  -3   9   2  832.76   15.78
  -3  -9   2  831.06   14.92
  -3   9   2  837.36   15.27
  -3  -9   2  831.10   15.48
  -3   9   1  125.76    4.26
  -3  -9   1  134.92    4.33
  -3  -9   1  130.14    3.85
  -3   9   1  130.18    4.17
   3   9   0  103.07    3.68
  -3  -9   0  100.02    3.02
  -3  -9   0  103.93    3.63
  -3   9   0   96.45    3.41
  -3   9   0  105.47    3.64
   3   9   1  155.86    4.95
  -3   9  -1  153.64    4.23
   3  -9   1  152.99    5.12
  -3  -9  -1  149.19    4.49
  -3  -9  -2  157.27    4.58
   3   9   2  160.58    5.36
   3  -9   2  159.03    5.48
   3  -9   3  414.20   10.28
   3   9   3  410.44   10.19
   3   9   4  146.72    5.78
   3  -9   4  139.31    5.65
   3  -9   4  147.48    5.35
   3  -9   4  139.39    5.13
   3   9   4  153.24    5.96
   3  -9   4  145.72    5.50
   3   9   4  140.54    5.50
  -3  -9  -4  140.81    5.64
   3  -9   5    1.22    0.84
  -3  -9  -5    1.16    0.92
   3   9   5    2.18    0.98
   3  -9   5    0.32    0.69
   3  -9   5    1.65    0.85
   3  -9   5    1.26    0.80
   3   9   5    0.83    0.90
   3  -9   5    4.33    1.07
   3  -9   5    1.19    0.74
   3   9   6   58.05    3.63
   3   9   6   58.44    3.89
   3  -9   6   63.04    3.68
   3  -9   6   69.44    3.57
   3  -9   6   68.13    3.87
   3   9   7  172.85    6.68
   3  -9   7  164.92    6.16
   3  -9   7  166.25    6.03
   3   9   7  172.01    6.28
   3  -9   7  167.22    5.93
   3  -9   7  172.26    5.51
   3   9   8   35.92    2.69
   3  -9   8   32.86    2.44
   3   9   8   31.03    2.25
  -3   9  -9   34.66    1.97
   3  -9   9   33.78    2.06
   3  -9   9   37.45    2.17
  -3  10  10   43.31    1.99
  -3 -10  10   35.30    1.99
  -3  10   9   29.89    2.22
  -3 -10   9   23.80    1.70
  -3 -10   9   27.98    2.20
  -3  10   8   68.79    3.91
  -3 -10   8   67.54    3.97
  -3 -10   8   73.72    3.59
  -3  10   8   67.20    3.18
  -3  10   7  318.38    9.44
  -3  10   7  302.15    8.10
  -3 -10   7  304.95    9.64
  -3 -10   7  310.49    8.48
  -3 -10   7  299.00    8.78
  -3  10   6   59.63    3.78
  -3  10   6   59.52    3.24
  -3 -10   6   61.26    3.57
  -3 -10   6   62.72    3.99
  -3 -10   6   69.17    3.78
  -3 -10   6   62.74    3.43
  -3  10   6   62.67    3.84
  -3 -10   6   65.77    3.79
  -3 -10   5  191.11    6.35
  -3  10   5  186.65    6.58
  -3 -10   5  190.86    6.53
  -3 -10   5  198.15    6.56
  -3 -10   5  187.40    6.97
  -3 -10   5  192.19    6.58
  -3  10   5  187.60    7.10
  -3 -10   5  193.89    6.18
  -3  10   5  192.32    6.04
  -3 -10   4   44.04    2.77
  -3 -10   4   43.58    2.91
  -3  10   4   43.44    3.07
  -3  10   4   48.65    2.73
  -3 -10   4   40.82    2.58
  -3 -10   4   40.83    2.73
  -3  10   3  106.08    4.14
  -3 -10   3  114.04    4.15
  -3  10   3  100.83    4.50
  -3 -10   3  107.70    4.31
  -3 -10   2 1093.80   19.42
  -3  10   2 1091.29   19.15
  -3 -10   2 1089.66   18.72
  -3  10   2 1054.04   19.68
  -3  10   1  155.00    4.79
  -3 -10   1  148.30    4.31
  -3 -10   1  153.59    4.84
  -3  10   1  148.16    4.84
  -3  10   0  385.97    8.60
  -3 -10   0  388.62    8.56
   3  10   0  384.01    8.74
  -3  10   0  367.77    8.28
  -3 -10   0  388.58    7.66
  -3  10  -1  308.80    7.38
   3  10   1  296.28    7.74
  -3 -10  -1  310.20    7.23
   3 -10   1  297.09    8.00
   3  10   2  474.80   10.98
   3 -10   2  480.07   11.19
   3 -10   3  216.96    7.14
   3  10   3  223.26    7.12
   3 -10   4   16.04    1.93
  -3 -10  -4   13.94    1.80
   3  10   4   15.15    1.83
   3 -10   4   12.33    1.66
   3 -10   4   13.60    1.66
   3 -10   4   15.63    1.74
   3  10   4   14.14    1.85
   3  10   4   10.28    1.52
   3  10   5   62.75    3.77
   3  10   5   61.52    3.91
   3 -10   5   63.80    3.60
   3 -10   5   66.32    3.31
   3  10   5   61.39    4.01
   3 -10   5   62.55    3.46
   3 -10   5   55.85    3.73
   3 -10   5   64.05    3.57
   3 -10   5   64.64    3.72
  -3 -10  -5   61.93    3.86
   3  10   6    3.85    1.30
   3 -10   6    4.03    1.02
   3 -10   6    5.35    1.20
   3 -10   6    5.10    1.22
   3  10   6    4.13    1.15
   3 -10   6    4.10    1.08
   3  10   7   35.94    2.94
   3 -10   7   33.60    2.63
   3 -10   7   42.10    2.89
   3  10   7   38.82    2.77
   3 -10   7   36.09    2.66
   3 -10   7   39.01    2.46
   3 -10   8  127.34    4.83
   3  10   8  137.40    4.65
   3 -10   8  135.94    4.48
  -3  10  -9   78.54    2.90
   3 -10   9   74.57    2.97
   3 -10   9   83.89    3.13
  -3  11   9   84.71    3.65
  -3 -11   9   87.90    3.28
  -3 -11   9   87.63    3.84
  -3  11   8  351.66    9.58
  -3 -11   8  344.10    9.81
  -3 -11   8  359.24    8.99
  -3  11   8  354.65    8.26
  -3 -11   7   12.98    1.99
  -3 -11   7   10.29    1.54
  -3 -11   7    9.84    1.53
  -3  11   7   12.14    1.56
  -3  11   7   10.44    1.77
  -3 -11   6    0.94    0.82
  -3 -11   6    1.24    1.01
  -3 -11   6    2.25    0.80
  -3  11   6    0.97    0.91
  -3  11   6    1.32    0.64
  -3  11   5   13.00    1.49
  -3  11   5   11.59    1.73
  -3 -11   5   12.78    1.70
  -3 -11   5   14.96    1.81
  -3 -11   5   15.11    1.75
  -3 -11   5   14.16    1.73
  -3 -11   5   12.68    1.83
  -3  11   5   14.13    1.99
  -3 -11   5   14.92    1.83
  -3  11   4    0.81    0.85
  -3 -11   4    2.21    0.82
  -3 -11   4    2.36    0.89
  -3  11   4    1.55    0.68
  -3 -11   4    2.45    0.95
  -3 -11   4    0.54    0.60
  -3 -11   4    1.26    0.77
  -3  11   4    1.46    0.74
  -3 -11   4    1.30    0.82
  -3 -11   3   -0.16    0.51
  -3  11   3    0.27    0.54
  -3 -11   3    0.17    0.55
  -3  11   2   98.59    3.96
  -3 -11   2  102.37    4.14
  -3 -11   2  101.42    3.78
  -3  11   2   94.87    4.19
  -3 -11   1   32.32    2.16
  -3 -11   1   30.10    1.84
  -3  11   1   30.81    2.10
  -3  11   1   29.11    2.07
   3  11   0  182.57    5.64
  -3 -11   0  173.84    5.27
  -3  11   0  178.60    5.20
   3 -11   0  170.86    5.70
  -3 -11   0  185.05    4.67
  -3  11   0  179.11    5.43
  -3  11  -1  374.61    8.66
   3  11   1  357.54    8.97
  -3 -11  -1  356.77    8.23
   3 -11   1  354.80    9.17
   3  11   2  257.68    7.61
   3 -11   2  259.96    7.78
   3 -11   3  280.76    8.52
   3 -11   3  279.56    7.69
   3  11   3  281.76    8.46
   3 -11   3  284.99    7.67
   3 -11   3  283.20    8.03
   3  11   4   61.62    3.83
   3 -11   4   69.75    4.09
   3 -11   4   65.30    3.54
   3  11   4   58.07    3.79
   3 -11   4   62.97    3.48
   3 -11   4   62.37    3.65
   3  11   4   67.20    3.74
  -3 -11  -4   65.00    3.86
   3  11   5  242.11    7.70
   3  11   5  231.65    8.04
   3 -11   5  241.32    7.46
   3 -11   5  231.34    7.23
   3 -11   5  233.81    7.52
   3 -11   5  230.89    7.33
   3 -11   5  220.40    7.98
   3 -11   5  232.58    7.64
   3 -11   5  236.18    6.88
  -3 -11  -5  215.89    7.68
   3  11   6    3.38    1.11
   3 -11   6    3.50    1.02
   3 -11   6    2.57    0.94
   3 -11   6    5.68    1.20
   3 -11   6    3.48    1.02
   3  11   6    2.57    0.87
   3  11   7    5.11    1.28
   3 -11   7    4.32    1.09
   3 -11   7    3.28    1.07
   3  11   7    4.04    1.13
   3 -11   7    2.22    0.88
   3 -11   7    3.66    0.89
  -3  11  -8    2.60    0.78
   3 -11   8    2.15    0.68
   3 -11   8    2.33    0.66
  -3  11  -9    0.43    0.41
   3 -11   9    0.16    0.44
   3 -11   9    0.74    0.51
  -3 -12   9   12.53    1.40
  -3 -12   9    9.95    1.08
  -3  12   9   11.46    1.29
  -3  12   8   29.96    2.44
  -3  12   8   26.46    1.82
  -3 -12   8   29.26    2.25
  -3 -12   8   25.34    2.38
  -3  12   7  161.53    6.34
  -3  12   7  173.37    5.58
  -3 -12   7  182.89    7.01
  -3 -12   7  170.59    5.94
  -3 -12   7  181.09    6.49
  -3 -12   6    8.30    1.48
  -3  12   6   10.79    1.66
  -3 -12   6   10.11    1.74
  -3 -12   6    7.80    1.37
  -3  12   6    8.77    1.30
  -3  12   5  433.97   11.11
  -3 -12   5  427.66   10.85
  -3  12   5  432.70   10.25
  -3 -12   5  431.87   11.04
  -3 -12   5  436.28   11.79
  -3  12   5  432.69   11.96
  -3 -12   5  426.90   11.20
  -3 -12   5  450.18   11.35
  -3 -12   4 1276.80   23.70
  -3  12   4 1222.22   23.00
  -3 -12   4 1223.42   22.88
  -3 -12   4 1267.87   23.21
  -3 -12   4 1276.71   23.55
  -3 -12   4 1274.47   24.24
  -3  12   4 1294.12   22.59
  -3 -12   4 1279.44   23.51
  -3  12   4 1281.12   24.44
  -3  12   3    3.97    0.93
  -3  12   3    3.17    1.02
  -3 -12   3    3.78    0.97
  -3 -12   3    3.02    0.85
  -3 -12   3    2.12    0.79
  -3 -12   2   16.73    1.57
  -3  12   2   17.60    1.71
  -3  12   2   12.10    1.50
  -3 -12   2   13.52    1.52
  -3  12   1   -0.24    0.53
  -3  12   1    0.18    0.57
  -3 -12   1    0.98    0.66
  -3  12   0  132.37    4.69
  -3 -12   0  127.40    4.51
  -3  12   0  130.11    4.41
   3 -12   0  130.57    4.99
  -3  12  -1   19.14    1.75
   3  12   1   19.16    1.84
  -3 -12  -1   21.78    1.74
   3 -12   1   19.95    1.96
   3 -12   2  207.96    7.06
   3  12   2  216.33    7.04
  -3  12  -3   53.11    3.15
   3  12   3   52.70    3.07
   3 -12   3   49.65    3.42
   3  12   3   49.67    3.38
   3 -12   3   52.02    3.03
   3 -12   3   52.36    3.04
   3 -12   3   51.11    3.15
   3  12   3   55.00    3.27
   3 -12   3   50.57    3.19
   3  12   4   81.52    3.97
   3 -12   4   77.02    3.92
   3 -12   4   74.94    4.43
   3  12   4   80.85    4.60
   3 -12   4   89.87    4.26
   3 -12   4   84.84    4.29
   3  12   4   79.48    4.16
  -3 -12  -4   79.33    4.32
   3  12   5  189.78    6.37
   3 -12   5  189.43    6.50
   3 -12   5  184.18    6.43
   3 -12   5  188.44    6.68
   3 -12   5  193.40    6.65
   3 -12   5  192.51    6.92
   3  12   5  193.57    6.77
   3 -12   5  199.28    6.22
   3 -12   6    6.79    1.35
   3 -12   6    7.84    1.44
   3 -12   6    7.44    1.30
   3 -12   6    6.10    1.28
   3  12   6    6.20    1.21
  -3  12  -7  156.51    5.49
   3 -12   7  142.65    5.32
   3 -12   7  139.43    5.36
   3 -12   7  147.53    4.92
   3 -12   7  144.99    5.37
  -3  12  -8   26.70    1.88
   3 -12   8   27.12    1.95
   3 -12   8   25.39    1.78
   3 -12   8   26.33    1.91
  -3  13   9   35.97    2.04
  -3 -13   9   31.19    1.72
  -3  13   8    1.98    0.66
  -3  13   8    2.61    0.82
  -3 -13   8    2.03    0.89
  -3 -13   8    3.12    0.82
  -3  13   7  487.39   12.01
  -3  13   7  488.69   10.73
  -3 -13   7  527.05   12.95
  -3 -13   7  485.56   11.38
  -3 -13   7  499.00   12.13
  -3  13   6    2.89    1.09
  -3 -13   6    2.36    0.84
  -3 -13   6    2.57    1.05
  -3 -13   6    3.78    1.16
  -3  13   6    3.79    0.86
  -3  13   5  608.13   14.04
  -3 -13   5  617.70   14.03
  -3 -13   5  637.19   15.11
  -3  13   5  644.91   13.46
  -3 -13   5  627.48   14.52
  -3 -13   5  631.60   14.50
  -3 -13   5  618.56   14.13
  -3 -13   4   13.86    1.72
  -3 -13   4   10.49    1.52
  -3  13   4   14.29    1.64
  -3  13   4   13.46    1.76
  -3 -13   4   11.79    1.70
  -3  13   4   14.33    1.96
  -3 -13   4   12.59    1.87
  -3 -13   4   10.05    1.58
  -3  13   3    1.16    0.72
  -3 -13   3    0.69    0.68
  -3 -13   3    0.67    0.60
  -3 -13   3    0.36    0.89
  -3  13   3    1.21    0.72
  -3 -13   3   -0.35    0.66
  -3  13   2  322.42    8.69
  -3 -13   2  343.43    8.97
  -3 -13   2  343.14    8.36
  -3  13   2  333.27    9.09
   3 -13  -2  341.96    8.67
  -3  13   2  330.49    8.42
  -3  13   1  152.90    5.39
  -3 -13   1  152.49    5.36
  -3  13   1  155.26    5.35
   3 -13  -1  152.00    5.46
  -3 -13   1  158.31    4.90
  -3  13   0   64.30    3.28
   3 -13   0   59.79    3.39
  -3 -13   0   57.53    3.00
  -3  13  -1   16.35    1.75
  -3  13  -1   17.40    1.76
   3  13   1   14.08    1.72
  -3 -13  -1   16.88    1.59
   3 -13   1   14.18    1.76
  -3  13  -2   91.14    4.21
   3  13   2   92.76    4.08
   3 -13   2   93.12    4.63
  -3  13  -2   91.21    4.13
   3  13   2   86.70    4.17
   3  13   2   91.49    4.49
   3 -13   2   92.81    3.96
  -3  13  -3   67.21    3.69
   3  13   3   70.39    3.57
   3 -13   3   63.38    3.98
   3  13   3   58.01    3.80
   3 -13   3   69.67    3.58
   3 -13   3   65.08    3.46
   3 -13   3   62.05    3.60
   3  13   3   63.15    3.59
   3  13   4  239.05    7.59
  -3  13  -4  246.70    7.69
   3  13   4  240.25    7.35
   3 -13   4  236.63    7.47
   3  13   4  233.43    8.41
   3 -13   4  232.46    8.32
   3 -13   4  245.09    7.83
   3 -13   4  243.23    7.49
  -3 -13  -4  226.14    7.82
  -3  13  -5   43.35    3.02
   3  13   5   37.58    2.71
   3 -13   5   33.87    2.65
   3 -13   5   35.18    2.75
   3 -13   5   35.67    2.87
   3  13   5   40.14    2.89
   3 -13   5   37.14    2.53
   3 -13   5   34.99    2.71
  -3  13  -6   41.61    2.86
   3  13   6   40.35    2.66
   3 -13   6   42.03    2.87
   3 -13   6   36.14    2.59
   3 -13   6   36.20    2.71
   3 -13   6   40.27    2.96
  -3  13  -7   74.76    3.59
   3 -13   7   68.97    3.46
   3 -13   7   73.14    3.67
   3 -13   7   75.70    3.31
   3 -13   7   69.68    3.55
  -3  13  -8    9.31    1.11
   3 -13   8    7.62    1.03
   3 -13   8    6.63    1.01
   3 -13   8    6.04    0.92
  -3  14   9    8.67    0.96
  -3  14   8    1.39    0.72
  -3 -14   8    1.56    0.69
  -3 -14   8    1.22    0.85
  -3  14   7   59.12    3.44
  -3  14   7   57.29    2.87
  -3 -14   7   61.84    3.80
  -3 -14   7   57.12    3.19
  -3 -14   7   56.16    3.42
  -3  14   6    0.00    0.71
  -3  14   6   -0.13    0.55
  -3 -14   6    1.11    0.89
  -3 -14   6   -0.13    0.92
  -3 -14   6    0.84    0.77
  -3  14   5   17.83    1.79
  -3 -14   5   17.55    2.01
  -3 -14   5   16.56    2.11
  -3 -14   5   16.73    1.83
  -3  14   5   18.19    2.06
  -3 -14   5   17.83    2.10
  -3  14   4    6.73    1.32
  -3 -14   4    2.82    1.01
  -3  14   4    3.57    0.98
  -3 -14   4    3.02    0.97
  -3 -14   4    2.57    1.03
  -3 -14   4    1.95    1.07
  -3  14   4    2.70    1.04
  -3 -14   4    2.90    1.10
  -3 -14   3  481.23   11.30
  -3 -14   3  501.42   12.03
  -3 -14   3  479.68   11.58
  -3  14   3  464.07   12.04
  -3 -14   3  490.99   11.65
  -3  14   3  473.61   11.01
  -3  14   2    0.50    0.64
  -3  14   2    0.31    0.58
  -3 -14   2    0.60    0.62
  -3  14   2    0.79    0.59
  -3 -14   2    0.33    0.62
  -3 -14   1   54.25    3.14
  -3  14   1   49.69    3.05
  -3  14   1   49.76    2.93
   3 -14  -1   53.26    3.17
  -3 -14   1   54.26    2.78
  -3  14   0   27.19    2.27
  -3  14   0   31.06    2.37
  -3  14   0   30.68    2.27
  -3 -14   0   29.64    2.20
   3 -14   0   30.95    2.50
   3  14   1  146.78    5.22
   3 -14   1  127.67    5.48
  -3  14  -1  139.15    5.33
  -3  14  -1  136.20    5.24
  -3  14  -1  136.05    5.01
   3  14   1  140.30    5.66
   3  14   2  635.94   13.51
  -3  14  -2  693.37   14.72
   3  14   2  712.98   14.31
   3 -14   2  644.18   15.29
  -3  14  -2  703.79   14.72
  -3  14  -2  663.29   13.93
   3  14   2  690.27   15.36
   3 -14   2  677.25   13.87
   3  14   2  642.18   14.33
  -3  14  -3  398.24   10.34
   3  14   3  394.30    9.91
  -3  14  -3  402.13   10.26
   3 -14   3  368.85   10.94
   3  14   3  390.29   11.03
   3 -14   3  386.52    9.79
   3 -14   3  394.42    9.91
   3  14   3  375.58   10.01
   3 -14   3  411.13   10.44
   3  14   3  369.04    9.12
  -3  14  -4   22.64    2.30
   3  14   4   25.71    2.23
  -3 -14  -4   18.16    2.26
   3  14   4   26.10    2.35
   3 -14   4   25.11    2.31
   3 -14   4   24.00    2.24
   3 -14   4   23.18    2.32
  -3  14  -5    3.76    1.14
   3 -14   5    3.85    0.95
   3 -14   5    4.76    1.08
   3 -14   5    3.62    1.08
   3 -14   5    5.08    1.24
   3 -14   5    4.23    1.26
   3  14   5    4.07    1.04
   3 -14   5    4.61    1.07
   3 -14   6    1.13    0.76
  -3  14  -6    3.66    1.10
   3 -14   6    4.64    1.05
   3  14   6    4.13    1.06
   3 -14   6    2.54    1.04
   3 -14   6    2.03    0.87
  -3  14  -7   50.25    2.85
   3 -14   7   57.12    2.96
   3 -14   7   59.23    2.81
   3 -14   7   52.77    3.00
   3 -14   7   54.55    3.04
  -3  14  -8    8.65    1.03
   3 -14   8    7.29    0.99
   3 -14   8    8.13    1.01
  -3  15   8   93.99    3.69
  -3 -15   8   92.16    3.66
  -3 -15   8   94.33    4.06
  -3  15   7    0.16    0.69
  -3  15   7   -0.13    0.59
  -3 -15   7    0.58    0.58
  -3 -15   7    0.47    0.65
  -3 -15   7    0.42    0.74
  -3 -15   7    0.32    0.88
  -3  15   6   20.56    2.03
  -3 -15   6   19.67    2.02
  -3 -15   6   19.95    2.29
  -3 -15   6   19.13    2.12
  -3  15   6   20.40    1.80
  -3  15   5   11.19    1.48
  -3 -15   5    9.90    1.59
  -3 -15   5   12.37    1.91
  -3 -15   5   10.02    1.51
  -3 -15   5   12.80    1.81
  -3  15   5   13.22    1.71
  -3  15   4    1.61    0.90
  -3 -15   4    0.63    0.92
  -3 -15   4   -0.24    0.76
  -3 -15   4    1.04    0.89
  -3  15   4    1.36    0.80
  -3 -15   4    1.25    0.87
  -3  15   3  342.07    8.94
  -3 -15   3  327.49    8.99
  -3 -15   3  342.89    9.69
  -3 -15   3  344.93    9.33
  -3  15   3  314.90    9.57
  -3  15   3  342.41    8.91
  -3  15   2   23.64    2.20
  -3  15   2   20.81    1.95
  -3 -15   2   24.10    2.26
  -3 -15   2   24.64    2.23
  -3  15   2   25.78    2.33
  -3 -15   2   24.86    2.10
  -3  15   1   10.82    1.46
  -3  15   1   11.40    1.48
  -3 -15   1   14.38    1.49
   3 -15  -1   14.45    1.75
  -3 -15   1   13.39    1.63
   3 -15   0   18.43    2.02
  -3  15   0   18.16    1.94
  -3 -15   0   20.31    1.88
  -3  15   0   18.36    1.87
  -3  15  -1   11.59    1.62
  -3  15  -1   11.02    1.54
   3  15   1   13.02    1.63
  -3  15  -1   13.01    1.63
   3 -15   1   10.37    1.63
   3  15   2  120.94    4.87
  -3  15  -2  112.62    5.00
  -3  15  -2  107.68    4.83
  -3  15  -2  102.52    4.47
   3  15   2  111.16    5.33
   3 -15   2  116.11    4.57
   3 -15   2  105.04    5.25
   3  15   2  100.45    4.30
   3  15   3   13.78    1.56
  -3  15  -3   13.99    1.81
   3 -15   3   15.50    2.16
   3  15   3   16.44    1.89
   3  15   3   14.87    1.78
   3 -15   3   14.40    1.72
   3 -15   3   14.73    1.74
  -3  15  -3   16.24    1.74
   3 -15   3   12.32    1.68
  -3  15  -3   13.27    1.78
  -3  15  -4  554.91   13.22
   3  15   4  584.74   12.91
   3 -15   4  563.34   12.96
   3 -15   4  557.58   12.94
   3 -15   4  548.38   13.32
  -3  15  -5   26.19    2.41
   3  15   5   27.81    2.30
   3 -15   5   26.51    2.32
   3 -15   5   23.36    2.22
   3 -15   5   27.04    2.40
   3 -15   5   24.37    2.39
   3 -15   5   30.69    2.28
  -3  15  -6  152.22    5.57
   3  15   6  153.67    5.18
   3 -15   6  153.10    5.30
   3 -15   6  154.17    5.40
   3 -15   6  154.22    5.54
   3 -15   6  156.46    5.81
  -3  15  -7    9.37    1.22
   3 -15   7   10.19    1.13
   3 -15   7    7.24    1.15
   3 -15   7    7.99    1.00
   3 -15   7    9.07    1.15
   3 -15   7    8.02    1.17
  -3  15  -8   50.48    2.18
   3 -15   8   48.99    2.12
  -3  16   8   17.32    1.45
  -3 -16   8   15.80    1.55
  -3 -16   8   15.48    1.43
  -3  16   7   38.29    2.51
  -3  16   7   35.07    1.98
  -3 -16   7   38.24    2.23
  -3 -16   7   36.12    2.38
  -3 -16   7   41.22    2.74
  -3 -16   7   38.03    2.75
  -3  16   6   84.25    4.06
  -3 -16   6   89.20    4.62
  -3 -16   6   87.88    4.10
  -3  16   6   85.65    3.63
  -3 -16   6   84.96    4.41
  -3 -16   6   93.49    4.52
  -3  16   5  164.45    5.96
  -3  16   5  155.57    5.39
  -3 -16   5  154.00    5.91
  -3 -16   5  160.65    6.51
  -3 -16   5  153.59    5.81
  -3 -16   5  161.70    6.26
  -3  16   4  489.17   11.60
  -3  16   4  494.14   11.35
  -3 -16   4  490.27   11.90
  -3 -16   4  491.17   12.67
  -3 -16   4  480.47   11.81
  -3  16   3  281.85    7.90
  -3 -16   3  284.52    8.22
  -3 -16   3  274.78    8.66
  -3 -16   3  276.35    8.21
  -3  16   3  250.71    8.40
  -3 -16   3  283.12    8.23
  -3  16   3  267.27    7.75
  -3  16   2   24.90    2.31
  -3  16   2   27.13    2.24
  -3 -16   2   24.37    2.14
  -3 -16   2   30.05    2.57
  -3 -16   2   24.76    2.24
  -3  16   1   36.07    2.76
  -3 -16   1   35.54    2.69
  -3  16   1   34.57    2.56
   3 -16   0   33.02    2.76
  -3  16   0   36.28    2.77
  -3  16   0   29.88    2.39
  -3 -16   0   31.47    2.43
  -3  16  -1    5.13    1.29
  -3  16  -1    5.77    1.25
  -3  16  -1    6.45    1.26
   3  16   1    4.24    1.15
   3 -16   1    9.25    1.64
   3  16   2   24.79    2.26
   3 -16   2   21.65    2.44
  -3  16  -2   22.49    2.24
  -3  16  -2   20.37    2.07
  -3  16  -2   24.85    2.21
   3 -16   2   22.97    2.20
   3  16   2   18.57    1.82
   3  16   3   11.61    1.44
  -3  16  -3   11.13    1.62
  -3  16  -3   10.92    1.51
   3 -16   3   11.42    1.50
   3 -16   3   12.05    1.67
   3 -16   3   13.78    1.85
   3  16   3   13.40    1.69
  -3  16  -4  115.15    5.13
   3  16   4  119.17    4.92
  -3  16  -4  112.78    4.70
   3 -16   4  118.76    5.02
   3 -16   4  116.23    4.97
   3 -16   4  115.43    5.21
  -3  16  -5    7.37    1.45
  -3  16  -5    5.30    1.03
   3 -16   5    6.34    1.12
   3 -16   5    5.68    1.24
   3 -16   5    5.30    1.25
   3 -16   5    6.42    1.25
   3  16   5    5.06    1.15
  -3  16  -6    0.38    0.71
  -3  16  -6    0.24    0.52
   3 -16   6    0.99    0.58
   3 -16   6    0.77    0.62
   3 -16   6    1.11    0.80
   3 -16   6    0.89    0.72
   3  16   6    0.61    0.54
  -3  16  -7    7.51    1.07
   3 -16   7    7.89    1.15
   3 -16   7    6.95    0.99
   3 -16   7    8.76    1.03
   3 -16   7    7.11    0.93
   3 -16   7    7.15    1.07
  -3  17   8  168.47    4.36
  -3 -17   8  152.99    4.39
  -3 -17   8  170.12    4.64
  -3 -17   8  163.24    4.90
  -3  17   7   96.31    3.76
  -3 -17   7   90.01    4.10
  -3 -17   7   95.16    3.48
  -3 -17   7   88.98    3.97
  -3  17   6   75.21    3.67
  -3 -17   6   79.12    4.18
  -3 -17   6   76.59    3.62
  -3 -17   6   72.64    3.65
  -3 -17   6   79.17    4.11
  -3 -17   6   81.67    4.09
  -3  17   6   79.55    3.33
  -3  17   5   14.04    1.55
  -3 -17   5   11.16    1.61
  -3 -17   5    8.78    1.54
  -3 -17   5   12.17    1.60
  -3  17   5   16.43    1.82
  -3 -17   5   10.73    1.61
  -3 -17   4   11.34    1.64
  -3 -17   4   11.68    1.72
  -3 -17   4   13.93    1.98
  -3  17   4   11.12    1.45
  -3  17   4   11.79    1.55
  -3  17   3   64.30    3.46
  -3  17   3   58.05    3.34
  -3 -17   3   60.50    3.54
  -3 -17   3   57.62    3.73
  -3 -17   3   60.22    3.50
  -3  17   2   11.31    1.60
  -3 -17   2   10.52    1.52
  -3 -17   2   14.30    1.79
  -3 -17   2   10.09    1.64
  -3  17   1    1.88    0.77
  -3  17   1    1.10    0.73
  -3 -17   1    0.57    0.80
  -3  17   0    7.48    1.40
  -3  17   0    4.52    1.09
   3 -17   0    9.23    1.65
  -3  17  -1   33.33    2.73
  -3  17  -1   38.45    2.78
   3 -17   1   39.36    3.19
   3  17   2   41.37    2.87
  -3  17  -2   40.76    3.03
  -3  17  -2   33.93    2.59
   3 -17   2   39.31    2.86
   3  17   2   38.85    2.65
   3  17   3  104.27    4.65
  -3  17  -3  106.73    4.96
  -3  17  -3  106.53    4.62
   3 -17   3  105.36    4.55
   3 -17   3  110.61    4.76
   3 -17   3  107.55    4.92
   3  17   3  107.46    4.40
  -3  17  -4   36.18    2.79
   3  17   4   34.69    2.56
  -3  17  -4   29.20    2.35
   3 -17   4   32.80    2.60
   3 -17   4   33.15    2.55
   3 -17   4   34.99    2.77
  -3  17  -5  328.09    8.97
   3  17   5  347.57    8.64
   3 -17   5  337.22    8.88
   3 -17   5  337.47    8.91
   3 -17   5  335.20    9.24
  -3  17  -5  331.19    8.32
   3 -17   5  324.61    8.24
   3  17   6  116.09    4.00
  -3  17  -6  109.42    4.31
   3 -17   6  104.75    4.07
   3 -17   6  106.67    4.23
  -3  17  -6  109.56    3.74
   3 -17   6  112.45    4.50
  -3  17  -7   22.66    1.60
   3 -17   7   22.16    1.65
   3 -17   7   21.04    1.39
   3 -17   7   21.10    1.62
   3 -17   7   21.09    1.41
  -3 -18   8   14.49    1.20
  -3  18   7   46.66    2.37
  -3 -18   7   47.70    2.26
  -3 -18   7   44.54    2.59
  -3 -18   7   46.06    2.68
  -3  18   6   72.15    3.38
  -3 -18   6   71.98    3.80
  -3 -18   6   64.95    3.23
  -3 -18   6   76.38    3.57
  -3 -18   6   67.45    3.66
  -3 -18   6   71.96    3.67
  -3  18   6   71.12    2.99
  -3  18   5   -0.03    0.59
  -3 -18   5   -0.04    0.68
  -3 -18   5   -0.27    0.72
  -3 -18   5    0.10    0.68
  -3  18   5    0.31    0.60
  -3 -18   5    0.31    0.77
  -3  18   4   -0.28    0.61
  -3  18   4    0.42    0.69
  -3 -18   4    1.29    0.96
  -3 -18   4    0.14    0.81
  -3 -18   4    0.76    0.80
  -3  18   3   20.37    1.97
  -3  18   3   20.79    2.00
  -3 -18   3   15.38    1.98
  -3 -18   3   18.43    2.01
  -3 -18   3   18.72    1.95
  -3 -18   2   32.62    2.49
  -3  18   2   28.18    2.35
  -3  18   1  408.44   10.41
  -3  18   0   36.73    2.74
  -3  18  -1   38.57    2.82
   3  18   2  109.10    4.75
  -3  18  -2  104.62    4.95
  -3  18  -2  103.07    4.62
   3 -18   2   99.39    4.56
   3  18   2   97.13    4.33
   3  18   3  117.84    4.90
  -3  18  -3  114.71    5.13
  -3  18  -3  112.85    4.76
   3 -18   3  113.73    4.68
   3 -18   3  111.54    4.79
   3 -18   3  114.03    5.01
   3  18   3  112.85    4.49
  -3  18  -4    1.62    0.81
  -3  18  -4    1.31    0.84
   3 -18   4    1.13    0.87
   3 -18   4    2.10    0.94
   3 -18   4    2.46    0.99
   3  18   4    0.20    0.76
   3  18   5  149.33    5.01
  -3  18  -5  143.70    5.35
  -3  18  -5  143.44    4.84
   3 -18   5  144.49    5.21
   3 -18   5  150.40    5.33
   3 -18   5  146.48    5.47
   3 -18   5  151.40    4.91
  -3  18  -6    1.44    0.63
   3  18   6    1.94    0.61
  -3  18  -6    2.07    0.67
   3 -18   6    2.47    0.76
   3 -18   6    1.55    0.73
   3 -18   6    1.86    0.74
  -3  18  -7   16.89    1.27
   3 -18   7   17.65    1.36
  -3  19   7    3.81    0.73
  -3 -19   7    4.87    0.75
  -3 -19   7    3.72    0.85
  -3 -19   7    3.57    0.79
  -3  19   6    2.72    0.67
  -3 -19   6    2.31    0.68
  -3 -19   6    1.60    0.70
  -3 -19   6    2.60    0.78
  -3 -19   6    3.36    0.93
  -3 -19   6    3.05    0.88
  -3  19   6    2.50    0.58
  -3  19   5    8.35    1.13
  -3 -19   5    7.33    1.34
  -3 -19   5    6.21    1.15
  -3 -19   5    8.88    1.48
  -3  19   5    6.74    1.14
  -3  19   4   66.94    3.38
  -3 -19   4   59.93    3.33
  -3 -19   4   64.63    3.76
  -3  19   4   63.87    3.25
  -3 -19   4   60.01    3.58
  -3  19   3    4.29    1.08
  -3 -19   3    2.80    0.96
  -3 -19   3    2.09    0.91
  -3  19   3    1.68    0.85
  -3  19   2  104.87    4.61
  -3 -19   2  106.13    4.85
  -3  19   1   -0.58    0.92
  -3  19   0   51.77    3.23
   3  19   1   14.53    1.73
  -3  19  -1   15.81    1.87
   3  19   2    5.73    1.17
  -3  19  -2    3.36    1.01
   3 -19   2    3.15    0.99
   3  19   3  218.92    6.79
  -3  19  -3  195.35    6.84
  -3  19  -3  192.63    6.38
   3 -19   3  201.11    6.30
   3 -19   3  206.78    6.59
   3 -19   3  204.69    6.76
   3  19   3  201.76    6.19
   3  19   4  515.38   11.30
  -3  19  -4  505.16   11.77
  -3  19  -4  490.43   11.11
   3 -19   4  508.30   11.59
   3 -19   4  489.42   11.14
   3 -19   4  495.96   11.68
   3 -19   4  496.20   11.38
  -3  19  -5    8.78    1.30
   3 -19   5    9.32    1.15
   3 -19   5    9.23    1.26
   3 -19   5    8.39    1.27
   3 -19   5    7.84    1.26
   3  19   5    9.30    1.22
  -3  19  -5    9.59    1.19
   3  19   6   27.33    1.62
  -3  19  -6   26.95    1.81
  -3  19  -6   28.41    1.60
   3 -19   6   29.60    1.84
   3 -19   6   28.04    1.93
   3 -19   6   26.35    1.89
   3 -19   7    0.19    0.31
  -3 -20   7   11.70    1.06
  -3 -20   7   10.16    1.06
  -3  20   6   13.78    1.24
  -3 -20   6   14.39    1.52
  -3 -20   6   11.91    1.23
  -3 -20   6   12.17    1.33
  -3 -20   6   13.78    1.36
  -3  20   5   56.00    2.76
  -3 -20   5   51.38    2.99
  -3 -20   5   58.04    3.07
  -3 -20   5   50.18    3.10
  -3 -20   5   51.11    3.02
  -3  20   5   54.43    2.56
  -3  20   4    2.62    0.78
  -3 -20   4    0.94    0.75
  -3 -20   4    1.50    0.85
  -3  20   4    2.04    0.75
  -3 -20   4    1.23    0.86
  -3  20   3  116.26    4.43
  -3 -20   3  108.59    4.52
  -3 -20   3  108.07    4.77
  -3  20   3  113.66    4.52
  -3  20   2  153.87    5.55
  -3 -20   2  154.86    5.77
  -3 -20   2  142.37    5.38
  -3  20   1  148.88    5.57
  -3  20   0  147.26    5.63
   3  20   1    0.03    0.68
  -3  20  -1    0.05    0.79
  -3  20  -2   56.45    3.29
   3 -20   2   53.27    3.08
   3 -20   2   56.81    3.22
   3  20   2   58.84    3.24
  -3  20  -3  149.35    5.28
   3 -20   3  136.42    5.20
   3 -20   3  137.72    4.85
   3 -20   3  138.34    5.10
   3  20   3  147.31    4.95
  -3  20  -4    5.64    1.05
   3 -20   4    5.90    1.14
   3  20   4    7.18    1.18
   3 -20   4    6.54    1.18
   3 -20   4    7.71    1.28
  -3  20  -5    1.72    0.61
   3 -20   5    2.71    0.69
   3 -20   5    1.88    0.69
   3 -20   5    2.86    0.79
   3 -20   5    1.55    0.71
   3 -20   5    1.66    0.73
   3 -20   6    7.49    0.90
   3 -20   6    6.75    0.94
   3 -20   6    7.95    0.99
  -3 -21   6    1.37    0.59
  -3 -21   6    1.21    0.55
  -3 -21   6    1.41    0.52
  -3  21   6    2.59    0.62
  -3 -21   6    1.42    0.64
  -3  21   5   18.46    1.46
  -3 -21   5   19.99    1.72
  -3 -21   5   17.78    1.62
  -3 -21   5   17.18    1.70
  -3 -21   5   14.73    1.52
  -3  21   5   15.68    1.26
  -3  21   4   66.93    2.99
  -3 -21   4   61.73    2.99
  -3 -21   4   64.01    3.36
  -3 -21   4   60.71    3.21
  -3 -21   4   60.70    3.21
  -3  21   4   63.30    2.93
  -3  21   3   16.49    1.64
  -3 -21   3   12.84    1.48
  -3 -21   3   14.44    1.65
  -3 -21   3   11.99    1.57
  -3  21   2   10.19    1.45
  -3 -21   2    8.11    1.27
  -3  21   1    1.02    0.79
   3  21   0    1.45    0.76
  -3  21   0    2.34    0.94
  -3  21  -1   28.84    2.34
   3  21   1   27.25    2.23
  -3  21  -2  199.00    6.29
   3 -21   2  194.03    6.01
   3 -21   2  196.15    6.06
   3  21   2  190.85    5.97
  -3  21  -3   71.16    3.44
   3 -21   3   74.52    3.45
   3 -21   3   70.89    3.44
  -3  21  -4    8.63    1.14
   3 -21   4   10.36    1.33
   3 -21   4    9.72    1.23
   3 -21   4    8.98    1.26
   3 -21   4    8.18    1.17
   3 -21   5    0.90    0.55
  -3  21  -5    0.58    0.44
   3 -21   5    1.17    0.64
   3 -21   5    0.38    0.50
   3 -21   5    0.90    0.55
   3 -21   5    0.01    0.52
   3 -21   6   10.47    0.91
  -3  21  -6    9.30    0.90
   3 -21   6    8.96    0.90
  -3 -22   6    0.98    0.33
  -3 -22   6    0.95    0.50
  -3  22   5    0.75    0.46
  -3 -22   5    1.12    0.59
  -3 -22   5    0.13    0.54
  -3 -22   5    0.27    0.49
  -3 -22   5    0.24    0.50
  -3 -22   5    1.07    0.58
  -3  22   4    8.00    0.97
  -3 -22   4    8.81    1.13
  -3 -22   4   10.53    1.30
  -3 -22   4   11.19    1.32
  -3 -22   3   58.90    2.85
  -3  22   3   60.64    2.92
  -3 -22   3   60.02    3.16
  -3 -22   2    8.80    1.22
  -3  22   2    9.60    1.32
  -3  22   1    9.60    1.43
  -3  22   0   35.62    2.50
   3  22   0   34.48    2.46
   3 -22   1   58.42    2.88
  -3  22  -1   59.57    3.19
   3  22   1   55.19    3.03
   3  22   2    0.52    0.50
   3 -22   2    1.69    0.68
  -3  22  -3  204.41    5.89
   3 -22   3  217.45    6.12
   3 -22   3  200.35    5.78
   3 -22   3  192.36    5.72
   3 -22   3  211.64    5.85
  -3  22  -4    4.07    0.75
   3 -22   4    4.30    0.83
   3 -22   4    3.16    0.76
   3 -22   4    3.69    0.77
   3 -22   4    3.68    0.77
   3 -22   4    4.86    0.82
  -3  22  -5   42.96    1.83
   3 -22   5   42.50    1.75
   3 -22   5   44.45    2.11
   3 -22   5   45.88    2.09
   3 -22   5   41.18    2.03
  -3  22  -5   42.67    2.03
  -3 -23   5    0.69    0.45
  -3 -23   5    1.12    0.54
  -3 -23   5    0.98    0.50
  -3 -23   4   29.43    1.90
  -3 -23   4   30.12    1.93
  -3 -23   4   27.32    1.93
  -3  23   4   29.48    1.63
  -3  23   3   14.19    1.31
  -3 -23   3   13.75    1.42
  -3 -23   2   99.91    3.63
  -3 -23   2   92.62    3.80
  -3  23   2   97.19    3.77
   3  23  -1    1.57    0.74
  -3  23   1    2.48    0.82
  -3 -23   1    2.56    0.74
  -3  23   0   77.90    3.51
   3  23   0   70.21    3.38
  -3  23  -1   48.99    2.75
   3 -23   1   48.11    2.42
   3 -23   1   45.91    2.49
   3  23   1   48.02    2.66
   3  23   2    6.44    0.97
  -3  23  -2    6.52    1.00
   3 -23   2    6.46    0.98
   3 -23   2    4.68    0.87
  -3  23  -3   43.83    2.31
   3 -23   3   41.91    2.29
   3 -23   3   48.52    2.31
   3 -23   3   42.32    2.21
   3 -23   3   44.65    2.20
  -3  23  -3   43.82    2.14
   3 -23   4   82.13    2.93
   3 -23   4   86.76    3.09
   3 -23   4   80.38    2.90
   3 -23   4   86.37    2.90
   3 -23   4   83.22    2.88
  -3  23  -4   85.32    2.92
  -3  23  -4   76.92    2.75
   3  24  -4   36.01    1.87
  -3 -24   4   39.76    2.02
  -3 -24   4   37.64    1.95
  -3 -24   4   36.33    1.83
  -3 -24   4   40.40    2.05
   3  24  -3    1.85    0.57
  -3 -24   3    3.56    0.75
  -3 -24   3    3.24    0.75
  -3 -24   3    1.77    0.61
  -3  24   3    1.99    0.47
   3  24  -2   19.38    1.62
  -3  24   2   22.57    1.59
  -3 -24   2   23.04    1.65
   3  24  -1    4.16    0.86
  -3 -24   1    5.21    0.92
  -3  24   1    4.42    0.85
  -3  24   0   28.86    1.96
   3  24   0   27.23    1.92
   3  24   1    6.16    0.93
  -3  24  -1    5.36    0.94
   3 -24   1    4.19    0.76
  -3  24  -2   16.92    1.41
   3 -24   2   14.71    1.29
   3 -24   2   14.68    1.22
   3 -24   3    0.77    0.50
   3 -24   3   -0.29    0.48
  -3  24  -3    0.39    0.40
   3 -24   4   38.70    1.73
  -3  25   3   16.37    1.05
  -3 -25   3   15.75    1.22
   3  25  -3   16.72    1.25
  -3 -25   2   54.53    2.21
  -3  25   2   62.39    2.38
   3  25  -2   55.57    2.49
   3  25  -1    8.83    1.03
  -3  25   1    9.74    1.03
   3  25   0    3.90    0.76
  -3  25   0    3.87    0.74
  -3  25  -1   34.75    1.91
   3 -25   1   31.09    1.59
   3  25   1   33.48    1.84
  -3  25  -2    1.22    0.52
   3 -25   2    1.70    0.50
   3 -25   2    0.57    0.41
   3 -25   3   44.15    1.81
  -3  25  -3   44.46    1.81
   3  26  -2    3.08    0.57
  -3 -26   2    4.10    0.60
   3  26  -1    0.72    0.42
  -3  26   1    0.60    0.40
  -3  26   0   83.53    2.75
   3  26   0   88.86    2.87
  -3  26  -1    9.20    0.88
  -4   0  10   20.27    1.65
  -4   0   9   -0.35    0.82
  -4   0   9   -0.06    0.65
  -4   0   8  341.25    9.81
  -4   0   8  347.74   10.57
  -4   0   8  321.77    8.95
  -4   0   7   -0.26    0.84
  -4   0   7    0.48    0.60
  -4   0   6   79.36    3.81
  -4   0   6   80.55    4.60
  -4   0   6   81.86    4.48
  -4   0   5    1.53    0.67
  -4   0   5    0.64    0.56
  -4   0   4   30.83    1.93
  -4   0   4   30.64    2.14
  -4   0   3   -0.19    0.46
  -4   0   2 5400.65   79.15
  -4   0   1    0.42    0.52
  -4   0   0    8.89    1.07
  -4   0  -1    1.65    0.61
  -4   0  -2  951.05   16.80
  -4   0  -3    0.53    0.50
   4   0   3    1.13    0.48
  -4   0  -4  275.04    7.74
  -4   0  -5    0.59    0.61
   4   0   5    1.10    0.93
   4   0   5    0.05    0.78
   4   0   6  114.60    5.24
   4   0   6  119.03    5.50
   4   0   7    0.75    0.79
   4   0   7   -0.31    0.84
   4   0   8   -0.07    0.71
   4   0   8    1.04    0.77
   4   0   9   -0.42    0.60
   4   0   9    0.62    0.64
  -4  -1  10    0.34    0.54
  -4   1  10    0.93    0.61
  -4   1   9   11.39    1.57
  -4  -1   9    9.68    1.59
  -4   1   9   10.26    1.65
  -4  -1   9   10.72    1.54
  -4   1   8    2.63    0.96
  -4  -1   8    3.24    1.30
  -4   1   8    2.64    1.07
  -4   1   8    3.17    1.11
  -4   1   7   18.76    2.37
  -4  -1   7   15.06    2.11
  -4   1   7   12.97    1.62
  -4  -1   7   13.91    1.69
  -4  -1   6  432.61   11.80
  -4  -1   6  445.37   10.60
  -4   1   6  443.06   12.08
  -4  -1   6  460.81   12.24
  -4   1   6  465.81   10.72
  -4   1   6  453.89   11.33
  -4   1   6  431.52   11.55
  -4  -1   5  213.75    6.28
  -4  -1   5  213.68    7.37
  -4   1   5  226.52    6.95
  -4  -1   5  230.41    6.75
  -4   1   5  216.48    6.31
  -4  -1   4  539.54   10.97
  -4   1   4  523.71   11.50
  -4  -1   4  542.82   11.40
  -4   1   4  568.01   10.92
  -4  -1   3  558.00   11.11
  -4   1   3  564.72   11.04
  -4  -1   2   69.03    2.89
  -4   1   2   67.76    2.84
  -4   1   1  126.97    3.07
  -4  -1   1  119.90    3.96
  -4   1   1  118.24    3.95
  -4  -1   0    5.58    0.95
  -4   1   0    6.70    0.97
  -4  -1  -1   52.50    2.64
  -4   1  -1   49.60    2.58
  -4  -1  -2  967.00   17.51
  -4   1  -2  968.41   16.87
   4  -1   3  584.75   11.50
  -4  -1  -3  578.91   12.14
  -4   1  -3  563.32   11.72
  -4  -1  -4    1.47    0.76
  -4   1  -4    1.69    0.58
   4   1   5  141.40    5.62
   4  -1   5  140.85    5.54
   4   1   5  142.58    5.87
  -4  -1  -5  142.72    5.71
   4  -1   5  145.83    5.81
  -4   1  -5  144.68    5.67
   4   1   6  166.73    6.43
   4  -1   6  159.73    6.25
   4   1   6  171.61    6.71
   4  -1   6  167.07    6.57
   4   1   7    8.50    1.55
   4  -1   7   10.76    1.70
   4   1   7   10.59    1.77
   4  -1   7   10.85    1.70
   4  -1   8    9.90    1.49
   4   1   8    8.02    1.46
   4  -1   8    8.34    1.38
   4   1   8    6.83    1.25
   4   1   9    0.13    0.51
   4  -1   9   -0.40    0.56
   4   1   9    0.12    0.51
   4  -1   9   -0.04    0.59
  -4   2  10   33.81    2.07
  -4  -2  10   33.54    2.11
  -4  -2   9   15.03    1.99
  -4   2   9   14.41    1.70
  -4   2   9   15.58    1.98
  -4  -2   9   15.71    1.79
  -4  -2   8   16.38    2.21
  -4   2   8   13.89    1.84
  -4   2   8   15.59    1.78
  -4   2   8   18.48    2.28
  -4  -2   7   -0.03    0.67
  -4   2   7    0.85    0.94
  -4   2   7    0.54    0.80
  -4  -2   7   -0.60    1.13
  -4   2   7    0.38    0.71
  -4  -2   6   42.77    2.81
  -4   2   6   42.35    2.73
  -4   2   6   36.00    3.10
  -4  -2   6   43.81    3.36
  -4   2   6   41.46    3.07
  -4  -2   6   43.55    3.32
  -4   2   6   42.90    3.16
  -4  -2   5   21.97    1.83
  -4   2   5   22.25    1.85
  -4   2   5   22.85    2.12
  -4  -2   5   22.14    1.91
  -4  -2   5   21.73    2.32
  -4   2   5   22.26    2.25
  -4  -2   4   82.74    3.38
  -4   2   4   76.71    3.59
  -4  -2   4   78.57    3.37
  -4  -2   3  513.37   10.50
  -4   2   3  523.11   10.36
  -4   2   2   36.90    2.07
  -4  -2   2   40.76    2.21
  -4  -2   1  638.10   12.29
  -4   2   1  626.64   12.25
   4   2   0   22.40    1.24
  -4  -2   0   19.81    1.56
  -4   2   0   19.03    1.54
  -4  -2  -1    6.50    0.98
  -4   2  -1    6.18    1.03
  -4   2  -1    7.13    0.80
  -4  -2  -2   47.58    2.58
  -4   2  -2   44.50    2.21
   4  -2   3   78.02    3.31
  -4  -2  -3   71.27    3.47
  -4   2  -3   70.25    3.15
  -4  -2  -4   93.12    4.30
  -4   2  -4   94.93    4.04
  -4  -2  -5    2.09    0.90
   4   2   5    2.61    1.07
  -4   2  -5    2.17    0.87
   4  -2   5    2.55    1.01
   4   2   5    1.49    0.91
   4  -2   5    0.72    0.97
   4  -2   5    2.80    1.04
   4   2   6   54.98    3.62
   4  -2   6   56.64    3.54
   4   2   6   51.58    3.66
   4  -2   6   51.20    3.56
   4   2   7    7.09    1.46
   4  -2   7    9.15    1.60
   4   2   7    5.87    1.41
   4  -2   7    7.68    1.53
   4   2   8   -0.59    0.70
   4  -2   8    0.02    0.68
   4  -2   8    0.69    0.76
   4   2   8    0.40    0.74
   4   2   9   25.38    1.89
   4  -2   9   25.05    1.86
   4   2   9   21.40    1.76
   4  -2   9   22.60    1.83
  -4   3  10   11.07    1.22
  -4  -3  10    9.39    1.17
  -4  -3   9    3.39    1.09
  -4   3   9    1.53    0.82
  -4  -3   9    0.55    0.69
  -4   3   9    1.12    0.75
  -4   3   8    7.61    1.28
  -4  -3   8    7.18    1.61
  -4   3   8    6.20    1.43
  -4   3   8    7.63    1.43
  -4   3   7  421.97   11.05
  -4  -3   7  375.19   10.04
  -4   3   7  406.45   10.20
  -4  -3   7  406.50   11.73
  -4   3   7  411.19   11.82
  -4   3   6  295.16    8.63
  -4  -3   6  272.27    7.88
  -4   3   6  286.73    9.19
  -4  -3   6  290.98    9.34
  -4   3   6  272.07    7.83
  -4  -3   6  306.83    8.56
  -4   3   6  284.89    8.80
  -4   3   6  290.51    8.75
  -4  -3   5   81.12    3.64
  -4   3   5   78.20    3.55
  -4   3   5   78.06    4.19
  -4   3   5   84.89    4.20
  -4  -3   5   77.72    4.25
  -4  -3   5   86.27    3.62
  -4  -3   4    1.91    0.68
  -4   3   4    1.44    0.69
  -4  -3   3   42.50    2.34
  -4   3   3   41.92    2.46
  -4   3   3   41.57    2.18
  -4   3   2  108.96    3.21
  -4  -3   2  108.03    3.80
  -4   3   2  103.85    3.66
  -4   3   1  740.27   12.65
  -4  -3   1  754.10   13.82
  -4   3   1  752.73   13.83
  -4   3   0  375.57    7.21
   4   3   0  367.14    7.15
  -4  -3   0  357.08    8.13
  -4   3   0  352.32    8.23
  -4  -3  -1    6.40    0.95
  -4   3  -1    4.53    0.62
   4   3   1    4.28    0.68
  -4  -3  -2  464.35    9.88
  -4   3  -2  436.72    8.90
  -4  -3  -3  160.52    5.53
   4  -3   3  162.63    5.21
  -4   3  -3  159.67    4.91
   4  -3   4   35.22    2.40
   4   3   4   38.37    2.82
  -4  -3  -4   41.55    2.86
  -4   3  -4   35.62    2.40
  -4  -3  -5    6.66    1.36
   4   3   5    7.73    1.45
  -4   3  -5    9.06    1.39
   4  -3   5    9.03    1.54
   4   3   5    7.84    1.51
   4  -3   5   10.68    1.53
   4   3   6   19.26    2.15
   4   3   6   21.52    2.44
   4  -3   6   21.45    2.34
   4  -3   6   18.57    2.05
   4   3   7  408.06   10.90
   4  -3   7  399.42   10.58
   4   3   7  400.07   11.10
   4  -3   7  384.03   10.66
   4   3   8   25.12    2.30
   4  -3   8   22.90    2.09
   4  -3   8   23.56    2.21
   4   3   8   25.52    2.38
   4   3   9   35.13    2.20
   4  -3   9   36.77    2.18
   4  -3   9   36.40    2.25
   4   3   9   31.69    2.08
  -4   4  10  185.96    5.08
  -4  -4  10  176.57    5.15
  -4  -4   9    3.01    1.01
  -4   4   9    3.39    1.00
  -4  -4   9    3.77    1.02
  -4   4   9    3.96    1.08
  -4   4   8   26.66    2.47
  -4   4   8   28.20    2.31
  -4  -4   8   29.10    2.79
  -4  -4   8   28.22    2.37
  -4   4   8   31.02    2.91
  -4   4   7   31.23    2.71
  -4   4   7   35.07    2.60
  -4   4   7   30.16    2.90
  -4  -4   7   33.79    3.04
  -4  -4   7   33.70    2.78
  -4   4   6    5.05    1.05
  -4   4   6    5.00    1.27
  -4  -4   6    4.57    1.23
  -4  -4   6    3.73    1.14
  -4   4   6    5.13    1.33
  -4   4   6    5.67    1.27
  -4  -4   6    4.68    1.06
  -4  -4   5  101.23    4.17
  -4   4   5  111.67    4.31
  -4   4   5  113.89    5.12
  -4  -4   5  101.92    4.37
  -4   4   5  112.96    5.01
  -4  -4   5  110.70    5.20
  -4  -4   5  117.18    4.38
  -4  -4   4   90.48    3.70
  -4   4   4   89.27    4.05
  -4  -4   4   87.81    3.50
  -4   4   3   -0.03    0.41
  -4   4   3    0.59    0.57
  -4  -4   3    0.20    0.48
  -4   4   2  115.07    3.46
  -4  -4   2  111.71    3.94
  -4   4   2  108.07    3.79
  -4  -4   1    8.57    1.10
  -4   4   1    8.45    1.05
  -4   4   1    9.03    0.89
  -4  -4   0    0.99    0.64
  -4   4   0    0.35    0.36
   4   4   0    0.33    0.33
  -4  -4  -1  207.49    5.81
   4   4   1  214.82    5.45
   4   4   2  133.05    4.46
  -4  -4  -2  132.12    4.49
  -4   4  -2  131.44    3.85
  -4  -4  -3    3.64    0.93
   4  -4   3    2.56    0.75
  -4   4  -3    3.03    0.76
   4   4   4  106.30    4.67
   4  -4   4  105.76    4.39
   4  -4   4  105.09    4.17
   4  -4   4  104.11    4.29
   4  -4   4  107.03    4.56
   4   4   4  106.35    4.80
   4  -4   4  108.83    4.52
  -4  -4  -4  110.12    4.86
  -4   4  -4  103.14    4.17
  -4   4  -5  234.40    7.32
   4   4   5  242.64    7.86
   4  -4   5  244.07    7.49
   4   4   5  252.35    8.22
   4  -4   5  234.07    6.86
   4   4   5  262.69    8.38
   4  -4   5  240.40    7.35
  -4  -4  -5  235.26    7.93
   4   4   6   98.66    4.93
   4  -4   6  100.39    4.73
   4   4   6  100.23    5.17
   4  -4   6  101.78    4.93
   4  -4   6  105.48    4.55
   4   4   7   24.76    2.44
   4  -4   7   30.17    2.57
   4   4   7   28.53    2.71
   4  -4   7   26.50    2.51
   4   4   8  312.64    8.77
   4  -4   8  320.83    8.58
   4   4   8  319.60    8.99
   4  -4   8  322.67    8.80
   4   4   9   19.99    1.65
   4  -4   9   22.19    1.68
   4   4   9   22.68    1.71
   4  -4   9   21.49    1.73
  -4   5  10    8.75    1.03
  -4  -5  10    8.42    1.07
  -4  -5   9    3.07    0.97
  -4   5   9    2.24    0.74
  -4   5   9    1.79    0.71
  -4   5   9    1.62    0.84
  -4   5   8  157.78    6.10
  -4   5   8  151.01    5.46
  -4   5   8  153.93    6.55
  -4  -5   8  149.60    5.76
  -4  -5   8  160.09    6.58
  -4   5   7  456.31   11.71
  -4   5   7  452.15   10.90
  -4   5   7  424.39   12.20
  -4  -5   7  445.86   12.40
  -4  -5   7  460.95   11.65
  -4   5   6    5.46    1.16
  -4   5   6    6.89    1.49
  -4  -5   6    8.11    1.69
  -4  -5   6    5.76    1.34
  -4   5   6    4.01    1.24
  -4   5   6    6.24    1.37
  -4  -5   5    5.88    1.11
  -4   5   5    4.05    0.87
  -4   5   5    5.06    1.15
  -4  -5   5    4.98    1.05
  -4  -5   5    4.86    1.07
  -4   5   5    5.70    1.24
  -4  -5   5    7.95    1.54
  -4  -5   5    6.05    1.08
  -4   5   4   91.06    4.25
  -4  -5   4   91.35    3.80
  -4  -5   3   55.81    2.81
  -4   5   3   56.95    3.00
  -4   5   2 2536.26   38.79
  -4  -5   2 2580.67   39.84
  -4   5   1  118.69    3.63
  -4  -5   1  123.79    4.18
  -4   5   0   78.44    2.83
   4   5   0   79.92    2.80
  -4  -5   0   73.40    3.16
   4   5   1  504.27   10.15
  -4  -5  -1  507.38   10.56
   4   5   2   90.05    3.70
  -4  -5  -2  110.01    4.00
   4   5   3 1040.36   19.44
  -4  -5  -3 1069.66   18.82
   4  -5   3 1028.16   19.35
  -4   5  -3 1040.56   18.13
  -4   5  -4  219.60    6.43
   4   5   4  217.31    7.08
   4  -5   4  213.25    6.84
   4  -5   4  225.22    6.75
   4   5   4  230.61    7.48
   4  -5   4  224.07    6.50
   4   5   4  230.15    7.38
   4  -5   4  223.40    7.04
  -4  -5  -4  212.55    7.21
   4  -5   4  228.72    6.98
  -4   5  -5  219.20    6.94
   4   5   5  214.70    7.39
   4  -5   5  217.57    6.98
   4   5   5  215.97    7.62
   4  -5   5  210.10    6.46
   4  -5   5  219.72    6.80
   4   5   5  220.64    7.72
   4  -5   5  220.62    6.58
   4  -5   5  219.79    7.05
  -4  -5  -5  202.66    7.39
   4   5   6  130.41    5.73
   4  -5   6  123.91    5.26
   4   5   6  121.20    5.72
   4  -5   6  125.84    5.10
   4   5   7    2.73    1.20
   4  -5   7    1.02    0.93
   4   5   7    1.29    1.08
   4  -5   7    1.37    0.92
   4   5   8  170.13    5.96
   4  -5   8  163.52    5.63
   4  -5   8  165.93    5.80
   4   5   8  153.59    5.65
   4   5   9  195.92    5.50
   4  -5   9  191.62    5.24
   4  -5   9  184.30    5.29
   4   5   9  196.08    5.32
  -4   6  10   44.88    2.12
  -4  -6  10   45.03    2.27
  -4   6   9    8.57    1.25
  -4   6   9    8.92    1.15
  -4  -6   9    7.59    1.24
  -4   6   8   73.62    3.99
  -4   6   8   65.83    4.14
  -4  -6   8   81.60    4.13
  -4  -6   8   81.68    4.53
  -4   6   8   75.61    3.68
  -4   6   7   98.39    4.80
  -4   6   7  103.29    4.50
  -4   6   7   99.38    5.24
  -4  -6   7   98.80    5.20
  -4  -6   7  102.08    4.95
  -4   6   6   44.29    3.11
  -4   6   6   41.52    2.78
  -4   6   6   46.78    3.46
  -4  -6   6   48.68    3.53
  -4  -6   6   46.43    3.27
  -4  -6   6   42.94    2.84
  -4   6   6   39.71    3.23
  -4  -6   5  616.79   13.02
  -4   6   5  600.02   14.00
  -4  -6   5  605.52   13.29
  -4  -6   5  605.78   13.80
  -4  -6   5  590.96   13.65
  -4  -6   5  617.01   12.99
  -4  -6   5  602.89   14.07
  -4   6   5  630.96   14.50
  -4  -6   5  579.63   14.32
  -4   6   5  605.79   12.75
  -4   6   4    2.83    0.82
  -4  -6   4    2.96    0.84
  -4  -6   3    1.43    0.58
  -4  -6   3    2.20    0.71
  -4   6   2    0.15    0.53
  -4  -6   2    0.43    0.48
  -4   6   2    0.65    0.61
  -4  -6   2    0.57    0.61
  -4   6   1  700.29   12.93
  -4  -6   1  734.87   13.81
  -4   6   0  135.13    4.07
   4   6   0  138.56    4.07
  -4  -6   0  133.74    4.50
   4   6   1   27.39    1.85
  -4  -6  -1   23.87    1.83
   4   6   2  100.00    3.98
  -4  -6  -2   96.95    3.81
   4  -6   2   96.41    4.10
   4   6   3  119.65    4.76
   4  -6   3  106.82    4.57
  -4  -6  -4   14.37    1.81
   4   6   4   15.16    1.80
   4  -6   4   11.49    1.45
   4  -6   4   13.54    1.58
   4   6   4   11.19    1.66
   4  -6   4   13.49    1.71
   4   6   4   11.22    1.65
   4  -6   4   12.26    1.63
   4  -6   4   14.45    1.73
   4   6   5   98.47    4.92
   4  -6   5  111.20    4.75
   4  -6   5  106.31    4.38
   4   6   5  110.90    5.37
   4   6   5  113.08    5.36
   4  -6   5  112.11    4.69
   4  -6   5  110.61    4.96
   4  -6   5  111.70    4.54
   4  -6   5  110.85    4.85
  -4  -6  -5  102.79    5.13
   4   6   6   -0.02    0.86
   4  -6   6    0.37    0.67
   4   6   6    1.08    0.98
   4  -6   6    0.21    0.76
   4   6   7   91.31    4.64
   4  -6   7   83.70    4.19
   4  -6   7   88.93    4.44
   4  -6   7   86.45    3.90
   4   6   7   86.34    4.63
   4   6   8    7.06    1.34
   4  -6   8    8.10    1.26
   4  -6   8    9.15    1.37
   4   6   8   10.51    1.48
   4  -6   9   37.06    2.03
   4  -6   9   37.84    2.11
   4   6   9   37.68    2.04
  -4   7  10    2.30    0.58
  -4  -7  10    1.76    0.57
  -4   7   9   99.38    4.06
  -4   7   9   90.04    3.50
  -4  -7   9   93.36    4.09
  -4  -7   9   94.28    3.88
  -4   7   8    2.63    0.82
  -4   7   8    3.39    1.19
  -4  -7   8    0.67    0.73
  -4   7   8    2.22    1.03
  -4  -7   8    2.26    0.99
  -4   7   7  161.88    6.26
  -4   7   7  172.17    5.92
  -4  -7   7  161.81    6.71
  -4  -7   7  164.94    6.47
  -4   7   7  154.55    6.56
  -4   7   6  577.24   13.45
  -4   7   6  570.82   14.20
  -4  -7   6  609.28   14.57
  -4  -7   6  592.11   14.04
  -4  -7   6  601.96   13.24
  -4   7   6  560.67   14.48
  -4   7   6  605.40   12.99
  -4   7   5  813.27   17.50
  -4  -7   5  831.63   16.88
  -4  -7   5  835.56   17.53
  -4  -7   5  854.26   16.74
  -4  -7   5  838.71   17.38
  -4  -7   5  826.58   16.59
  -4  -7   5  842.25   17.83
  -4   7   5  830.06   18.06
  -4   7   5  846.38   16.31
  -4  -7   4    0.33    0.55
  -4   7   4    0.04    0.63
  -4  -7   4    0.65    0.65
  -4  -7   3  211.01    6.28
  -4  -7   3  217.56    6.04
  -4   7   3  203.69    6.57
  -4   7   2  518.38   10.59
  -4  -7   2  523.35   11.17
  -4   7   2  518.07   11.41
  -4  -7   2  545.70   10.67
  -4   7   1  137.49    4.30
  -4  -7   1  140.23    4.71
  -4   7   0  373.62    8.19
   4   7   0  384.04    8.23
  -4  -7   0  368.57    8.65
   4   7   1   47.65    2.55
  -4  -7  -1   51.03    2.70
   4   7   2   24.48    2.00
  -4  -7  -2   26.91    1.96
   4  -7   2   24.24    2.10
   4   7   3    0.82    0.64
   4  -7   3    1.44    0.78
   4  -7   4  109.92    4.63
   4   7   4  113.49    5.07
   4  -7   4  116.16    5.09
   4  -7   4  113.03    4.43
   4  -7   4  120.24    4.76
   4   7   4  119.28    5.28
   4  -7   4  109.97    4.85
  -4  -7  -4  105.75    5.06
   4   7   5  631.93   14.82
   4  -7   5  653.65   13.99
   4   7   5  639.79   15.10
   4  -7   5  643.35   13.41
   4  -7   5  634.12   13.79
   4   7   5  645.60   15.30
   4  -7   5  644.56   14.44
   4  -7   5  620.58   14.17
  -4  -7  -5  598.83   14.81
   4   7   6    0.72    0.98
   4  -7   6    1.52    0.90
   4  -7   6    1.57    0.80
   4   7   7  123.26    5.44
   4  -7   7  118.34    4.95
   4   7   7  121.89    5.31
   4  -7   7  125.38    5.22
   4  -7   7  128.40    4.82
   4   7   8   70.09    3.61
   4  -7   8   65.91    3.25
   4  -7   8   69.69    3.43
   4   7   8   67.88    3.40
  -4   7  -9   91.80    3.09
   4  -7   9   81.07    2.92
   4   7   9   81.11    2.88
   4  -7   9   87.74    3.08
  -4  -8  10   41.72    2.02
  -4   8   9    1.59    0.55
  -4   8   9    2.86    0.81
  -4  -8   9    1.32    0.59
  -4  -8   9    1.64    0.69
  -4   8   8  222.21    7.07
  -4   8   8  227.81    6.61
  -4  -8   8  228.04    7.39
  -4  -8   8  217.10    7.32
  -4   8   8  209.33    7.37
  -4   8   7  207.21    7.10
  -4   8   7  207.11    6.59
  -4  -8   7  214.57    7.69
  -4  -8   7  206.53    7.41
  -4   8   7  201.36    7.48
  -4   8   6  276.27    8.37
  -4  -8   6  303.96    9.36
  -4  -8   6  286.51    9.05
  -4  -8   6  288.16    8.37
  -4   8   6  293.17    8.13
  -4   8   6  297.08    9.18
  -4   8   5  357.12    8.88
  -4  -8   5  339.96    9.25
  -4  -8   5  350.56    9.91
  -4  -8   5  336.66    9.12
  -4  -8   5  333.27    9.62
  -4  -8   5  347.54    9.23
  -4  -8   5  336.53    9.10
  -4   8   5  341.42   10.21
  -4   8   5  341.80    9.64
  -4   8   4  302.17    7.76
  -4  -8   4  294.06    8.05
  -4  -8   4  293.62    8.12
  -4  -8   4  309.38    8.06
  -4  -8   4  285.77    8.34
  -4  -8   4  303.36    8.76
  -4   8   4  294.99    8.87
  -4  -8   4  279.39    8.73
  -4   8   3   37.15    2.31
  -4  -8   3   38.23    2.51
  -4  -8   3   39.97    2.39
  -4   8   3   37.58    2.71
  -4   8   2  538.38   11.05
  -4  -8   2  545.31   11.62
  -4  -8   2  540.09   10.89
  -4   8   2  523.66   11.73
  -4   8   1   50.89    2.56
  -4  -8   1   56.74    2.92
  -4  -8   1   52.54    2.41
  -4   8   1   50.69    2.78
  -4   8   0  133.10    4.35
   4   8   0  135.44    4.36
  -4  -8   0  130.30    4.60
   4   8   1  346.74    8.41
  -4  -8  -1  350.44    8.42
   4   8   2  243.51    7.13
  -4  -8  -2  256.92    6.83
   4  -8   2  248.10    7.53
   4   8   3  525.18   12.35
   4  -8   3  531.52   11.76
   4  -8   3  513.64   11.46
   4   8   3  533.50   12.41
   4  -8   3  532.65   12.08
   4   8   3  524.72   12.43
   4  -8   3  548.74   11.59
   4  -8   3  522.72   12.47
   4   8   4   31.56    2.63
   4  -8   4   27.53    2.53
   4  -8   4   24.61    2.18
   4   8   4   25.04    2.48
   4  -8   4   26.99    2.41
   4   8   4   26.35    2.48
   4  -8   4   27.82    2.17
   4  -8   4   27.61    2.29
  -4  -8  -4   26.98    2.53
   4   8   5  260.12    8.55
   4  -8   5  267.55    7.81
   4  -8   5  264.13    7.40
   4  -8   5  240.15    8.14
   4  -8   5  253.98    8.06
   4   8   5  258.37    8.43
   4  -8   5  251.97    7.95
  -4  -8  -5  252.27    8.55
   4   8   6  123.99    5.60
   4  -8   6  107.29    4.77
   4  -8   6  122.04    4.87
   4   8   6  108.49    5.24
   4  -8   6  125.91    4.70
   4  -8   6  115.41    5.02
   4   8   7   53.97    3.48
   4  -8   7   55.38    3.23
   4  -8   7   55.58    3.30
   4   8   7   52.48    3.34
   4  -8   7   55.19    3.10
   4   8   8   14.62    1.64
   4  -8   8   13.90    1.49
   4  -8   8   13.02    1.41
   4   8   8   13.53    1.49
  -4   8  -9   15.02    1.18
  -4   9   9    0.16    0.43
  -4   9   9    1.48    0.65
  -4  -9   9    0.43    0.58
  -4   9   8   -0.37    0.53
  -4  -9   8    1.09    0.79
  -4   9   8    1.00    0.83
  -4  -9   8    0.98    0.84
  -4   9   7   51.89    3.32
  -4   9   7   52.43    3.07
  -4   9   7   56.96    3.71
  -4  -9   7   54.42    3.63
  -4  -9   7   55.83    3.69
  -4   9   6    3.67    1.08
  -4  -9   6    4.64    1.23
  -4  -9   6    3.45    1.12
  -4  -9   6    4.27    1.04
  -4   9   6    2.30    0.97
  -4  -9   5   95.34    4.50
  -4  -9   5   96.17    4.85
  -4  -9   5  100.40    4.58
  -4  -9   5   91.51    3.93
  -4  -9   5   95.87    4.39
  -4  -9   5   93.08    4.70
  -4  -9   5   95.28    4.45
  -4   9   5   92.85    5.01
  -4   9   5   98.31    4.25
  -4   9   4    3.71    0.89
  -4  -9   4    6.13    1.18
  -4  -9   4    4.25    1.02
  -4  -9   4    2.63    0.90
  -4  -9   4    3.90    0.98
  -4   9   4    3.80    1.19
  -4  -9   4    4.80    1.12
  -4   9   3  208.93    6.21
  -4  -9   3  216.77    6.64
  -4  -9   3  207.21    6.16
  -4   9   3  208.18    7.01
  -4   9   2  544.61   11.55
  -4  -9   2  567.64   12.12
  -4  -9   2  569.36   11.38
  -4   9   2  534.54   12.23
  -4   9   1  133.31    4.53
  -4  -9   1  134.32    4.81
  -4  -9   1  137.27    4.22
  -4   9   1  126.77    4.68
  -4  -9   0    2.96    0.81
  -4   9   0    3.69    0.78
   4   9   0    2.87    0.73
  -4   9   0    2.98    0.77
   4   9   1   20.07    1.78
  -4  -9  -1   23.09    1.87
  -4   9  -1   21.75    1.75
  -4  -9  -2   32.12    2.19
   4   9   2   33.98    2.49
   4  -9   2   37.82    2.77
   4  -9   3  262.38    8.19
   4   9   3  240.18    7.74
   4  -9   3  252.62    7.63
   4  -9   3  251.67    7.38
   4  -9   3  255.74    7.28
   4   9   3  264.25    8.07
   4   9   3  271.01    8.13
   4  -9   4    1.08    0.99
  -4  -9  -4    0.43    0.92
   4   9   4    0.16    0.85
   4  -9   4    0.85    0.75
   4  -9   4    0.73    0.76
   4  -9   4   -0.26    0.63
   4   9   4    0.96    0.88
   4  -9   4    1.32    0.78
   4   9   4    0.87    0.85
   4   9   5   57.72    3.83
   4  -9   5   63.27    3.33
   4  -9   5   59.74    3.46
   4  -9   5   57.70    3.64
   4   9   5   60.10    3.79
   4  -9   5   57.21    3.58
   4   9   6    6.41    1.40
   4  -9   6    5.66    0.97
   4  -9   6    6.86    1.22
   4  -9   6    6.05    1.28
   4  -9   6    9.17    1.55
   4   9   6    6.22    1.41
   4  -9   6    7.68    1.22
   4  -9   6    6.86    1.32
   4   9   7    2.30    0.96
   4  -9   7    2.17    0.88
   4   9   7    4.35    1.10
   4  -9   7    2.64    0.87
   4  -9   7    3.85    0.97
   4  -9   8   73.76    3.18
   4  -9   8   69.34    3.13
   4   9   8   70.13    3.18
  -4   9  -9   35.03    1.70
  -4  10   9   14.32    1.33
  -4  10   9   13.36    1.13
  -4 -10   9   15.30    1.47
  -4  10   8   28.41    2.24
  -4  10   8   25.43    1.93
  -4 -10   8   31.13    2.52
  -4  10   7  122.27    5.13
  -4 -10   7  129.47    5.46
  -4 -10   7  116.20    5.42
  -4 -10   7  123.53    4.97
  -4  10   7  120.81    4.73
  -4  10   7  115.75    5.22
  -4  10   6   45.92    3.09
  -4  10   6   48.09    2.97
  -4 -10   6   49.69    3.41
  -4 -10   6   45.94    3.22
  -4 -10   6   43.44    3.38
  -4 -10   6   47.07    2.83
  -4 -10   6   45.84    3.16
  -4 -10   5  130.12    5.36
  -4 -10   5  127.52    5.36
  -4 -10   5  142.12    6.11
  -4 -10   5  136.39    5.54
  -4 -10   5  138.21    5.02
  -4 -10   5  135.99    5.40
  -4  10   5  130.91    5.01
  -4 -10   5  136.03    5.79
  -4  10   5  118.00    5.81
  -4 -10   4   14.11    1.70
  -4 -10   4   11.26    1.68
  -4 -10   4    9.02    1.55
  -4  10   4   13.79    1.59
  -4 -10   4   10.73    1.49
  -4  10   4    8.48    1.57
  -4 -10   4   11.29    1.52
  -4  10   3  102.16    4.24
  -4  10   3  117.67    4.42
  -4 -10   3  101.57    4.47
  -4 -10   3  106.88    4.79
  -4  10   3   96.26    4.73
  -4 -10   3  101.44    4.56
  -4 -10   3  104.96    4.21
  -4  10   2    0.79    0.58
  -4 -10   2    1.53    0.63
  -4  10   2    2.23    0.83
  -4 -10   2    1.31    0.74
  -4  10   1   22.25    1.82
  -4 -10   1   22.41    1.62
  -4 -10   1   20.82    1.90
  -4  10   1   20.19    1.84
  -4  10   0   88.69    3.79
  -4 -10   0   92.00    3.95
   4  10   0   98.54    3.90
  -4  10   0   95.96    3.85
  -4  10  -1   51.15    2.84
   4  10   1   56.15    3.11
  -4 -10  -1   53.03    2.90
   4 -10   1   51.80    3.26
  -4  10  -2   44.88    2.72
   4 -10   2   38.15    2.53
   4  10   2   41.06    2.85
   4 -10   2   42.20    2.74
   4  10   2   38.46    2.82
   4 -10   2   38.87    2.89
   4 -10   3   47.31    3.34
   4 -10   3   44.76    2.89
   4  10   3   41.35    3.05
   4 -10   3   44.17    2.78
   4 -10   3   41.47    2.90
   4  10   3   42.12    3.04
   4 -10   4    7.66    1.46
  -4 -10  -4    7.62    1.39
   4  10   4    7.54    1.41
   4 -10   4    8.78    1.36
   4 -10   4    8.61    1.44
   4 -10   4    8.05    1.36
   4  10   4   10.16    1.76
   4 -10   4    9.35    1.55
   4  10   4    9.18    1.58
   4  10   5   56.38    3.80
   4 -10   5   55.11    3.34
   4 -10   5   55.15    3.58
   4  10   5   53.46    3.60
   4 -10   5   56.71    3.20
   4  10   6   12.31    1.90
   4 -10   6   12.89    1.58
   4 -10   6   13.85    1.53
   4 -10   6   13.49    1.62
   4 -10   6   14.79    1.87
   4  10   6   14.78    1.92
   4 -10   6   16.68    1.76
   4 -10   6   17.38    1.99
   4 -10   7   42.79    2.67
   4 -10   7   44.53    2.73
   4  10   7   44.02    2.85
   4 -10   7   42.10    2.67
  -4  10  -8    3.51    0.76
   4 -10   8    2.03    0.61
   4  10   8    2.26    0.65
   4 -10   8    1.80    0.73
  -4  11   9   13.69    1.22
  -4  11   9   14.40    1.10
  -4 -11   9   14.58    1.42
  -4  11   8    4.17    0.85
  -4  11   8    4.05    0.92
  -4 -11   8    4.67    1.12
  -4  11   7    7.24    1.29
  -4 -11   7    9.06    1.67
  -4 -11   7   11.89    1.53
  -4  11   7    7.28    1.22
  -4  11   6  617.31   13.64
  -4 -11   6  582.83   13.93
  -4  11   6  601.99   13.14
  -4 -11   6  602.36   14.76
  -4 -11   6  631.64   13.14
  -4 -11   6  605.97   13.94
  -4 -11   5  174.12    6.43
  -4 -11   5  173.66    6.93
  -4 -11   5  189.13    6.78
  -4 -11   5  183.61    6.01
  -4 -11   5  173.65    6.37
  -4 -11   5  181.18    6.80
  -4 -11   5  177.97    6.49
  -4  11   5  192.78    6.22
  -4  11   4   -0.10    0.63
  -4 -11   4    0.74    0.79
  -4 -11   4    0.35    0.71
  -4 -11   4    0.44    0.81
  -4 -11   4    0.28    0.64
  -4  11   4    0.29    0.72
  -4 -11   4    1.27    1.05
  -4 -11   3   50.67    3.17
  -4 -11   3   46.90    2.82
  -4 -11   3   43.92    3.01
  -4 -11   3   45.79    3.14
  -4  11   3   48.11    3.38
  -4  11   3   49.08    2.84
  -4  11   2    2.33    0.78
  -4  11   2    0.90    0.56
  -4 -11   2    1.07    0.61
  -4 -11   2   -0.37    0.74
  -4  11   2    2.34    0.85
  -4 -11   2    1.05    0.63
  -4 -11   1   33.56    2.07
  -4 -11   1   32.85    2.40
  -4  11   1   30.85    2.24
  -4  11   1   30.65    2.33
  -4 -11   0    5.49    1.10
  -4  11   0    5.34    0.96
   4  11   0    6.85    1.14
  -4  11   0    4.99    0.95
  -4 -11  -1    0.80    0.62
  -4  11  -1    1.81    0.76
   4  11   1    1.33    0.65
   4  11   1    1.06    0.90
   4 -11   1    0.56    0.53
  -4  11  -2   -0.24    0.57
  -4  11  -2    0.96    0.75
  -4  11  -2    0.27    0.82
   4 -11   2    1.52    0.78
   4 -11   2    0.02    0.69
   4  11   2    0.57    0.75
   4 -11   2    0.29    0.73
   4  11   2    0.46    0.90
   4 -11   2    0.04    0.72
  -4  11  -3  131.95    5.19
   4 -11   3  131.18    5.83
   4 -11   3  130.29    5.14
   4  11   3  126.78    5.66
   4 -11   3  131.73    5.04
   4 -11   3  129.64    5.33
   4  11   3  127.45    5.47
   4 -11   4  511.00   13.42
   4 -11   4  536.81   11.99
   4 -11   4  513.44   12.24
   4 -11   4  530.11   12.75
   4  11   4  546.92   13.15
  -4 -11  -4  500.40   13.14
   4 -11   4  541.04   12.33
   4 -11   5  238.41    7.06
   4 -11   5  236.57    7.42
   4 -11   5  230.91    7.40
   4 -11   5  231.21    7.77
   4  11   5  233.22    7.84
   4 -11   6   84.66    3.64
   4 -11   6   85.85    4.01
   4 -11   6   86.33    4.32
   4  11   6   80.19    4.20
   4 -11   6   90.82    3.96
   4 -11   6   86.50    4.28
  -4  11  -7   15.73    1.66
   4 -11   7   16.07    1.60
   4  11   7   14.11    1.59
   4 -11   7   16.13    1.69
  -4  11  -8    2.73    0.70
   4 -11   8    2.92    0.68
   4  11   8    3.03    0.75
   4 -11   8    1.32    0.57
  -4  12   9    4.06    0.66
  -4 -12   9    4.24    0.78
  -4  12   8   35.09    2.24
  -4  12   8   33.91    2.04
  -4 -12   8   36.88    2.63
  -4  12   7   11.37    1.35
  -4  12   7    9.95    1.46
  -4 -12   7   13.79    1.88
  -4 -12   7   11.08    1.34
  -4 -12   7   11.72    1.53
  -4  12   6   26.00    2.27
  -4 -12   6   22.51    2.28
  -4 -12   6   26.37    2.66
  -4 -12   6   26.56    2.17
  -4 -12   6   24.54    2.39
  -4  12   6   27.78    2.25
  -4  12   5   34.89    2.57
  -4 -12   5   35.17    3.08
  -4 -12   5   34.82    2.51
  -4 -12   5   34.70    2.76
  -4 -12   5   39.88    3.13
  -4 -12   5   35.75    2.85
  -4 -12   4  583.27   13.37
  -4 -12   4  590.55   13.76
  -4 -12   4  624.04   13.45
  -4 -12   4  574.98   13.66
  -4  12   4  558.38   14.43
  -4 -12   4  580.64   13.97
  -4  12   4  584.85   12.76
  -4 -12   3  551.17   12.26
  -4 -12   3  556.87   13.00
  -4 -12   3  553.46   12.93
  -4 -12   3  562.36   13.21
  -4  12   3  534.46   13.45
  -4  12   3  545.73   12.06
  -4  12   2   73.38    3.69
  -4  12   2   68.94    3.44
  -4 -12   2   67.47    3.26
  -4 -12   2   66.02    3.66
  -4 -12   2   65.02    3.66
  -4  12   2   64.18    3.71
  -4  12   1   10.23    1.40
  -4  12   1   11.28    1.38
  -4 -12   1   10.63    1.19
  -4  12   1   10.10    1.42
  -4 -12   1    9.87    1.45
  -4  12   0   85.46    3.94
  -4  12   0   86.74    4.00
  -4  12   0   90.45    3.86
  -4 -12   0   95.87    4.22
   4 -12   0   99.71    4.64
  -4  12  -1   77.70    3.77
  -4  12  -1   80.45    3.87
  -4  12  -1   80.20    3.60
   4  12   1   79.70    3.98
  -4 -12  -1   75.60    3.65
   4 -12   1   76.99    3.69
   4  12   1   71.59    3.91
   4 -12   1   69.02    4.00
   4 -12   2  799.04   17.85
  -4  12  -2  866.28   17.00
  -4  12  -2  843.17   16.90
  -4  12  -2  848.57   16.13
   4  12   2  815.47   17.55
   4 -12   2  837.22   16.26
   4 -12   2  826.99   16.83
   4  12   2  852.51   17.56
  -4  12  -3    9.35    1.47
   4 -12   3   10.37    1.54
   4 -12   3   12.40    1.61
   4  12   3   12.46    1.87
   4 -12   3    9.79    1.55
   4  12   3   11.86    1.78
   4 -12   3    9.46    1.68
  -4  12  -4  165.43    6.08
   4 -12   4  164.40    5.81
   4 -12   4  159.13    5.97
   4 -12   4  157.61    5.87
   4 -12   4  159.85    6.22
   4  12   4  170.21    6.47
  -4  12  -5   63.12    3.64
   4 -12   5   68.43    3.47
   4 -12   5   61.77    3.57
   4 -12   5   60.73    3.59
   4 -12   5   64.21    3.81
   4  12   5   62.08    3.75
  -4  12  -6   13.11    1.66
   4 -12   6   10.14    1.60
   4  12   6   10.64    1.51
   4 -12   6   11.23    1.41
   4 -12   6   13.37    1.40
   4 -12   6   12.90    1.56
   4 -12   6   11.20    1.58
  -4  12  -7    1.60    0.69
   4 -12   7    0.77    0.60
  -4  12  -8    2.74    0.65
   4 -12   8    1.74    0.57
  -4  13   8   41.38    2.30
  -4  13   8   38.17    2.06
  -4 -13   8   37.07    2.57
  -4 -13   8   36.03    2.10
  -4  13   7   21.75    1.92
  -4  13   7   24.49    1.92
  -4 -13   7   22.65    2.30
  -4 -13   7   24.57    1.92
  -4 -13   7   23.20    2.09
  -4  13   6   18.35    1.88
  -4 -13   6   17.94    1.78
  -4 -13   6   20.04    2.33
  -4 -13   6   15.02    1.93
  -4  13   6   16.24    1.69
  -4  13   5  681.71   14.24
  -4 -13   5  657.61   14.90
  -4 -13   5  676.14   15.90
  -4 -13   5  683.28   14.28
  -4 -13   5  657.46   15.05
  -4 -13   4   13.57    1.83
  -4 -13   4   14.09    1.82
  -4 -13   4   14.45    1.95
  -4 -13   4   13.92    1.79
  -4  13   4   15.91    1.78
  -4 -13   4   12.81    1.78
  -4 -13   3    1.25    0.92
  -4  13   3    2.16    0.99
  -4 -13   3    0.68    0.77
  -4 -13   3    1.00    0.86
  -4  13   3   -0.76    0.90
  -4 -13   3   -0.31    0.75
  -4  13   2   12.54    1.61
  -4  13   2   12.70    1.57
  -4 -13   2   14.89    1.62
  -4 -13   2   11.76    1.70
  -4  13   2   12.37    1.71
  -4 -13   2   11.24    1.60
  -4  13   1   20.68    2.02
  -4  13   1   18.63    1.82
  -4 -13   1   17.45    1.94
   4 -13  -1   18.84    1.99
  -4  13   1   17.70    1.90
  -4  13   1   18.39    1.85
  -4  13   0   66.60    3.55
  -4  13   0   69.67    3.68
  -4  13   0   70.14    3.44
  -4 -13   0   69.08    3.63
   4 -13   0   64.81    3.87
  -4  13  -1  263.33    7.78
  -4  13  -1  255.14    7.72
  -4  13  -1  255.12    7.27
   4  13   1  265.07    8.09
   4 -13   1  262.41    7.50
   4  13   1  259.40    8.09
   4 -13   1  247.89    8.33
  -4  13  -2    1.82    0.85
  -4  13  -2    1.68    0.86
  -4  13  -2    2.22    0.85
   4 -13   2    1.77    0.83
   4  13   2    1.76    1.03
   4 -13   2    1.07    0.91
   4  13   2    1.60    0.93
   4 -13   2    0.85    0.79
  -4  13  -3  149.42    5.78
   4 -13   3  134.13    6.27
  -4  13  -3  145.52    5.16
   4 -13   3  141.49    5.56
   4 -13   3  143.33    5.43
   4 -13   3  156.70    5.97
   4  13   3  146.35    5.97
  -4  13  -4    0.78    0.76
   4 -13   4    4.59    1.10
   4 -13   4    3.57    1.10
   4 -13   4    1.24    0.88
   4 -13   4    1.83    0.93
   4  13   4    2.48    1.04
  -4  13  -5    7.44    1.37
   4 -13   5    7.52    1.38
   4 -13   5    6.59    1.23
   4 -13   5    7.50    1.43
   4  13   5    7.17    1.40
   4 -13   5    5.78    1.08
  -4  13  -6   11.41    1.54
   4 -13   6    8.24    1.11
   4 -13   6    8.72    1.29
   4 -13   6   10.42    1.55
   4  13   6    9.10    1.35
   4 -13   6   10.74    1.39
   4 -13   6   10.42    1.51
  -4  13  -7  101.73    3.96
   4 -13   7  104.75    4.04
  -4  13  -8    9.10    0.98
  -4 -14   8    2.51    0.64
  -4 -14   8    3.10    0.87
  -4 -14   8    1.86    0.58
  -4  14   8    3.14    0.65
  -4  14   8    2.31    0.67
  -4  14   7  187.67    5.70
  -4  14   7  176.79    5.37
  -4 -14   7  191.58    6.67
  -4 -14   7  178.41    5.45
  -4 -14   7  186.31    6.09
  -4  14   6  107.48    4.44
  -4  14   6  109.86    4.41
  -4 -14   6  115.71    5.43
  -4 -14   6  108.95    4.47
  -4 -14   6  111.71    5.03
  -4  14   5  141.52    5.24
  -4 -14   5  138.51    5.71
  -4 -14   5  140.18    6.21
  -4 -14   5  138.41    5.29
  -4 -14   5  140.13    5.81
  -4 -14   4  400.68   10.45
  -4 -14   4  370.42   10.87
  -4 -14   4  395.58   10.65
  -4 -14   4  372.55   10.47
  -4  14   4  388.54    9.76
  -4 -14   3  568.85   12.67
  -4 -14   3  567.74   13.50
  -4 -14   3  554.90   13.18
  -4  14   3  536.67   13.78
  -4 -14   3  530.84   12.99
  -4  14   3  550.54   12.41
  -4  14   2   31.67    2.56
  -4  14   2   32.49    2.44
  -4 -14   2   31.36    2.36
  -4 -14   2   36.46    2.85
  -4  14   2   32.20    2.77
  -4 -14   2   30.14    2.58
   4 -14  -2   31.08    2.59
  -4  14   1    0.12    0.63
  -4  14   1    1.15    0.80
   4 -14  -1    2.57    0.94
  -4 -14   1    1.38    0.95
  -4  14   1    0.41    0.71
  -4 -14   0   -0.51    0.86
  -4  14   0   -0.82    0.86
  -4  14   0    0.22    0.69
  -4  14   0   -0.92    0.95
  -4  14   0    0.39    0.67
   4 -14   0    0.18    0.72
  -4  14  -1  182.28    6.39
  -4  14  -1  183.88    6.47
  -4  14  -1  175.23    5.95
   4 -14   1  183.06    6.10
   4 -14   1  177.29    6.97
  -4  14  -2    9.25    1.49
  -4  14  -2    8.75    1.45
  -4  14  -2    7.96    1.25
   4 -14   2    7.87    1.32
   4  14   2    8.10    1.57
   4 -14   2    7.67    1.34
   4  14   2    5.90    1.27
   4 -14   2    5.16    1.34
  -4  14  -3  573.55   13.25
  -4  14  -3  548.73   12.16
   4 -14   3  563.55   13.00
   4 -14   3  542.39   12.58
   4 -14   3  568.51   13.24
   4  14   3  566.11   13.42
  -4  14  -4   25.34    2.36
   4 -14   4   21.97    2.05
   4 -14   4   21.97    2.21
   4 -14   4   18.06    1.95
   4 -14   4   23.20    2.32
   4  14   4   21.35    2.24
  -4  14  -5   79.46    4.04
   4 -14   5   77.43    3.67
   4 -14   5   83.32    4.02
   4 -14   5   77.26    3.90
   4 -14   5   75.01    4.07
   4  14   5   77.37    3.97
   4 -14   5   75.68    4.08
  -4  14  -6   55.63    3.14
   4 -14   6   53.84    2.67
   4 -14   6   60.31    3.12
   4 -14   6   59.98    3.36
   4  14   6   55.42    2.99
   4 -14   6   61.96    3.10
   4 -14   6   56.21    3.24
  -4  14  -7  135.88    4.54
   4 -14   7  148.93    4.74
  -4  14  -8   75.10    2.55
  -4 -15   8    1.45    0.51
  -4  15   8    2.15    0.51
  -4 -15   8    2.42    0.78
  -4 -15   8    1.45    0.60
  -4  15   7   15.32    1.43
  -4  15   7   13.83    1.35
  -4 -15   7   11.77    1.59
  -4 -15   7   14.77    1.59
  -4  15   6    0.44    0.59
  -4 -15   6   -0.41    0.97
  -4 -15   6    0.40    0.59
  -4 -15   6    0.38    0.81
  -4 -15   5   16.55    1.91
  -4 -15   5   18.64    1.91
  -4 -15   5   18.16    2.25
  -4  15   5   18.09    1.81
  -4 -15   5   16.68    2.02
  -4  15   4  675.14   14.30
  -4 -15   4  677.60   14.98
  -4 -15   4  673.13   15.81
  -4 -15   4  679.20   15.23
  -4  15   3  392.46    9.94
  -4 -15   3  408.20   10.75
  -4 -15   3  397.69   10.62
  -4  15   2   69.94    3.94
  -4 -15   2   69.02    4.01
  -4 -15   2   66.47    3.81
  -4 -15   2   67.94    3.83
  -4  15   2   66.59    3.55
  -4  15   1  200.00    7.00
  -4  15   1  204.85    6.61
  -4 -15   1  207.49    7.04
  -4 -15   1  213.25    7.03
  -4  15   1  215.44    6.68
   4 -15  -1  191.47    7.13
  -4  15   0   58.74    3.34
  -4 -15   0   63.71    3.62
  -4  15   0   71.47    3.92
  -4  15   0   66.26    3.59
   4 -15   0   52.87    3.65
  -4  15  -1   90.12    4.42
   4 -15   1   84.92    4.78
  -4  15  -1   90.45    4.50
  -4  15  -1   85.74    4.05
   4 -15   1   88.80    4.22
  -4  15  -2    0.90    0.88
  -4  15  -2   -0.11    0.65
   4 -15   2    0.68    0.70
   4 -15   2    0.60    0.68
  -4  15  -3   60.62    3.69
  -4  15  -3   61.94    3.31
   4 -15   3   61.49    3.59
   4 -15   3   55.93    3.33
   4 -15   3   61.85    3.69
   4  15   3   56.27    3.55
  -4  15  -4    0.51    0.76
  -4  15  -4    0.25    0.64
   4 -15   4    0.08    0.70
   4 -15   4   -0.38    0.80
   4 -15   4    0.00    0.72
   4 -15   4    1.54    1.03
   4  15   4   -0.60    0.64
  -4  15  -5   -0.47    0.71
   4 -15   5    0.61    0.69
   4 -15   5    0.04    0.68
   4 -15   5   -0.46    0.74
   4 -15   5   -0.12    0.88
   4  15   5    1.20    0.62
   4 -15   5    0.55    0.81
  -4  15  -6    1.34    0.69
   4 -15   6    0.25    0.70
   4 -15   6    0.89    0.63
   4 -15   6    0.86    0.54
   4 -15   6    2.52    0.66
   4 -15   6    1.75    0.71
  -4  15  -7    0.35    0.50
   4 -15   7   -0.43    0.53
  -4 -16   8   31.59    1.97
  -4 -16   8   31.20    1.63
  -4  16   7    3.47    0.70
  -4 -16   7    2.76    0.94
  -4 -16   7    2.93    0.73
  -4  16   6  140.39    4.78
  -4 -16   6  143.19    5.77
  -4 -16   6  149.92    5.12
  -4 -16   6  148.87    5.53
  -4  16   5   13.67    1.59
  -4 -16   5   11.14    1.63
  -4 -16   5   11.90    1.83
  -4 -16   5   13.71    1.66
  -4 -16   5   14.05    1.82
  -4  16   4  426.95   10.30
  -4 -16   4  422.67   10.93
  -4 -16   4  414.63   11.47
  -4 -16   4  413.17   10.89
  -4  16   3   39.83    2.77
  -4 -16   3   39.33    2.93
  -4 -16   3   38.05    2.90
  -4 -16   3   40.83    2.94
  -4  16   2    0.40    0.72
  -4 -16   2   -0.17    0.72
  -4 -16   2    0.27    0.76
  -4  16   1    0.43    0.69
   4 -16  -1   -0.23    1.07
  -4 -16   1    0.43    0.77
  -4  16   0    0.55    0.73
  -4  16   0    1.43    0.84
   4 -16   0    0.03    0.71
  -4  16  -1  258.14    8.05
  -4  16  -1  252.90    7.56
   4 -16   1  263.79    7.77
  -4  16  -2  154.10    6.04
  -4  16  -2  152.91    5.58
   4 -16   2  155.26    5.52
   4 -16   2  150.91    5.75
  -4  16  -3    1.08    0.84
  -4  16  -3    0.54    0.65
   4 -16   3    0.44    0.79
   4 -16   3    0.84    0.78
   4 -16   3    1.06    0.89
  -4  16  -4   20.25    2.09
  -4  16  -4   23.32    1.92
   4 -16   4   21.92    2.02
   4 -16   4   23.01    2.18
   4 -16   4   22.49    2.11
   4 -16   4   19.88    2.12
  -4  16  -5   66.42    3.54
   4 -16   5   67.26    3.21
   4 -16   5   68.28    3.47
   4 -16   5   64.90    3.37
   4 -16   5   71.82    3.74
   4 -16   5   66.81    3.63
  -4  16  -6   28.54    2.05
   4 -16   6   30.23    1.77
   4 -16   6   30.00    2.03
   4 -16   6   27.66    2.10
   4 -16   6   27.95    1.95
   4 -16   6   28.61    2.13
  -4  16  -7    0.36    0.52
  -4  16  -7   -0.21    0.44
   4 -16   7    0.24    0.41
  -4 -17   8   33.49    1.81
  -4  17   7    3.33    0.63
  -4 -17   7    4.28    0.93
  -4 -17   7    3.71    0.84
  -4 -17   6   80.77    4.05
  -4 -17   6   79.58    3.30
  -4  17   6   73.31    3.18
  -4 -17   6   74.63    3.38
  -4 -17   6   73.29    3.75
  -4 -17   6   72.88    3.65
  -4  17   5   67.65    3.30
  -4 -17   5   59.78    3.44
  -4 -17   5   66.20    3.43
  -4 -17   5   63.96    3.68
  -4  17   4   84.71    3.91
  -4 -17   4   83.62    4.22
  -4 -17   4   87.28    4.64
  -4 -17   4   80.20    4.14
  -4 -17   4   77.26    4.19
  -4  17   3    1.74    0.94
  -4 -17   3    1.88    0.83
  -4 -17   3    1.35    0.77
  -4  17   2   46.26    2.99
  -4 -17   2   44.05    3.05
  -4  17   1  105.22    4.62
  -4  17   0  178.98    6.23
  -4  17   0  187.42    6.31
  -4  17  -1   31.63    2.48
   4 -17   1   37.53    2.70
  -4  17  -2   14.57    1.94
  -4  17  -2   16.92    1.80
   4 -17   2   14.43    1.80
   4 -17   2   13.18    1.59
   4 -17   2   17.38    1.87
   4 -17   2   17.00    1.93
   4  17   2   17.82    1.74
  -4  17  -3   91.87    4.52
  -4  17  -3   94.38    4.11
   4 -17   3   95.49    4.45
   4 -17   3   92.03    4.19
   4 -17   3   91.24    4.40
  -4  17  -4    2.53    1.00
  -4  17  -4    2.79    0.78
   4 -17   4    3.12    0.98
   4 -17   4    2.39    0.97
   4 -17   4    2.55    0.90
   4 -17   4    1.75    0.78
   4 -17   4    1.95    0.82
  -4  17  -5    3.02    0.92
   4 -17   5    1.51    0.64
   4 -17   5    2.28    0.86
   4 -17   5    1.33    0.79
   4 -17   5    2.09    0.77
  -4  17  -6    6.70    1.00
   4 -17   6    5.27    0.78
   4 -17   6    5.90    0.92
   4 -17   6    6.76    0.98
   4 -17   6    5.87    1.00
  -4  17  -7    0.11    0.36
  -4  17  -7    0.03    0.38
   4 -17   7    0.36    0.38
  -4 -18   7    3.23    0.79
  -4 -18   7    3.17    0.68
  -4  18   7    2.75    0.54
  -4  18   6   18.04    1.45
  -4 -18   6   21.29    1.97
  -4 -18   6   17.58    1.47
  -4 -18   6   17.67    1.56
  -4 -18   6   18.72    1.81
  -4 -18   6   19.30    1.77
  -4  18   5   11.33    1.33
  -4 -18   5   11.20    1.47
  -4 -18   5   12.22    1.71
  -4 -18   5   14.47    1.60
  -4 -18   5   12.90    1.68
  -4 -18   4   31.05    2.48
  -4  18   4   33.11    2.37
  -4 -18   4   31.12    2.71
  -4 -18   4   31.58    2.60
  -4  18   3   29.17    2.33
  -4 -18   3   31.05    2.54
  -4 -18   3   26.30    2.56
  -4 -18   3   32.53    2.56
  -4  18   2  128.65    5.11
  -4 -18   2  128.42    5.26
  -4  18   1  114.88    4.83
  -4  18   0    7.33    1.30
   4 -18   0    6.73    1.09
  -4  18   0    7.76    1.32
   4  18   1   35.89    2.54
  -4  18  -1   39.90    2.78
   4 -18   1   41.02    2.77
  -4  18  -2   26.29    2.43
  -4  18  -2   31.89    2.42
   4 -18   2   29.11    2.38
   4 -18   2   24.10    2.06
   4 -18   2   25.83    2.22
   4 -18   2   29.18    2.39
   4  18   2   28.21    2.10
  -4  18  -3  150.62    5.77
  -4  18  -3  156.48    5.32
   4 -18   3  160.25    5.72
   4 -18   3  148.23    5.33
   4 -18   3  150.21    5.59
   4 -18   3  154.08    5.73
  -4  18  -4  148.35    5.46
  -4  18  -4  145.83    4.82
   4 -18   4  146.57    5.08
   4 -18   4  148.05    5.32
   4 -18   4  149.24    5.21
   4 -18   4  145.93    5.42
   4 -18   4  156.84    5.63
  -4  18  -5    2.83    0.87
   4 -18   5    3.12    0.83
   4 -18   5    4.41    0.85
   4 -18   5    3.34    0.88
   4 -18   5    1.95    0.70
  -4  18  -6    1.63    0.60
   4 -18   6    1.25    0.55
   4 -18   6    0.34    0.43
   4 -18   6    0.90    0.47
  -4 -19   7   56.80    2.50
  -4 -19   7   60.62    2.45
  -4 -19   6   18.08    1.65
  -4 -19   6   15.93    1.33
  -4 -19   6   16.92    1.42
  -4  19   6   16.31    1.26
  -4 -19   6   15.75    1.56
  -4 -19   6   16.92    1.57
  -4  19   5  163.00    4.94
  -4 -19   5  147.64    5.17
  -4 -19   5  150.85    5.55
  -4 -19   5  161.05    5.25
  -4 -19   5  169.69    5.68
  -4  19   4    8.71    1.26
  -4 -19   4    4.39    1.07
  -4 -19   4    7.02    1.31
  -4 -19   4    8.30    1.40
  -4 -19   3   13.84    1.69
  -4 -19   3   11.68    1.63
  -4 -19   3   11.30    1.49
  -4  19   3   12.98    1.56
  -4  19   2    4.93    1.11
  -4 -19   2    7.81    1.35
  -4  19   1  170.31    5.89
  -4 -19   1  151.30    5.68
   4 -19   0  430.42    9.96
  -4  19   0  414.05   10.35
  -4  19  -1   51.38    3.09
   4 -19   1   52.54    3.06
  -4  19  -1   53.48    3.12
   4  19   1   44.82    2.77
   4  19   2    1.64    0.64
  -4  19  -2    0.53    0.64
   4 -19   2    1.68    0.87
   4 -19   2    1.68    0.73
   4 -19   2    1.64    0.82
   4 -19   2    0.78    0.70
  -4  19  -3   12.07    1.41
   4 -19   3    8.41    1.32
   4 -19   3    9.64    1.30
   4 -19   3   10.59    1.42
  -4  19  -4   89.28    3.94
  -4  19  -4   82.74    3.33
   4 -19   4   84.87    3.56
   4 -19   4   84.01    3.71
   4 -19   4   81.36    3.55
   4 -19   4   89.26    3.88
   4 -19   4   81.06    3.75
   4 -19   5   -0.17    0.43
   4 -19   5    0.65    0.52
   4 -19   5    1.34    0.72
   4 -19   5    0.74    0.62
  -4  19  -6    0.74    0.49
   4 -19   6   -0.01    0.39
   4 -19   6    0.58    0.49
  -4  20   6    0.23    0.40
  -4 -20   6    0.09    0.39
  -4 -20   6    0.69    0.60
  -4 -20   6    0.50    0.49
  -4 -20   6    0.18    0.51
  -4  20   5   19.07    1.48
  -4 -20   5   20.29    1.83
  -4 -20   5   20.30    1.67
  -4 -20   5   18.72    1.72
  -4 -20   4    1.17    0.73
  -4 -20   4    1.71    0.80
  -4  20   4    1.51    0.69
  -4 -20   4    0.97    0.75
  -4  20   3    0.52    0.72
  -4 -20   3   -0.49    0.66
  -4 -20   3    0.30    0.58
  -4 -20   3    0.21    0.58
  -4 -20   2   22.20    2.04
  -4 -20   2   22.14    2.15
  -4 -20   2   27.44    2.14
  -4  20   2   25.21    2.10
  -4  20   1   18.52    1.85
  -4 -20   1   16.06    1.70
   4  20   0    5.81    1.09
  -4  20   0    6.83    1.22
  -4 -20   0    5.82    1.10
  -4  20  -1    0.43    0.65
   4  20   1    0.86    0.59
  -4  20  -1    1.76    0.84
   4 -20   1   -0.12    0.73
  -4  20  -2   45.30    2.72
   4 -20   2   50.57    2.91
   4 -20   2   48.64    2.67
   4 -20   2   51.97    2.83
   4 -20   2   51.56    2.87
  -4  20  -2   53.82    3.01
   4  20   2   50.59    2.63
  -4  20  -3   12.53    1.47
  -4  20  -3   13.09    1.40
   4 -20   3   14.45    1.59
   4 -20   3   14.13    1.45
   4 -20   3   13.49    1.47
   4 -20   3   15.66    1.60
  -4  20  -4  179.48    4.93
   4 -20   4  183.96    5.46
   4 -20   4  177.93    5.21
   4 -20   4  172.45    5.35
   4 -20   4  181.64    5.24
   4 -20   4  178.36    5.48
  -4  20  -5    3.54    0.76
   4 -20   5    2.92    0.60
   4 -20   5    2.59    0.64
   4 -20   5    2.07    0.67
   4 -20   5    1.77    0.62
  -4 -21   6    6.91    0.87
  -4  21   5   59.65    2.39
  -4 -21   5   54.89    2.70
  -4 -21   5   61.20    2.70
  -4 -21   5   57.91    2.88
  -4 -21   5   58.39    2.81
  -4 -21   4    8.06    1.10
  -4 -21   4    7.15    1.13
  -4 -21   4    8.30    1.12
  -4  21   4    6.73    0.98
  -4 -21   4    9.75    1.26
  -4  21   3   18.03    1.61
  -4 -21   3   17.74    1.77
  -4 -21   3   15.24    1.68
  -4 -21   3   18.39    1.70
  -4  21   2   -0.65    0.80
  -4 -21   2    0.58    0.62
  -4 -21   2    0.75    0.56
  -4  21   1    3.33    0.98
  -4 -21   1    3.08    0.82
   4  21   0   -0.91    0.78
  -4  21   0    0.62    0.66
   4  21   1    4.87    0.92
  -4  21  -1    4.05    0.94
   4 -21   1    5.04    0.93
  -4  21  -2   14.35    1.45
  -4  21  -2   16.10    1.57
   4 -21   2   16.43    1.61
   4 -21   2   16.83    1.48
   4  21   2   15.81    1.41
  -4  21  -3   59.23    2.75
   4 -21   3   54.88    2.81
   4 -21   3   61.75    2.78
   4 -21   3   58.35    2.78
   4 -21   3   58.72    2.84
   4 -21   3   61.54    2.87
  -4  21  -3   57.66    2.86
  -4  21  -4  234.86    5.54
   4 -21   4  236.63    6.06
   4 -21   4  240.49    5.88
   4 -21   4  242.20    6.08
  -4  21  -4  241.47    6.12
   4 -21   5   57.13    2.27
   4 -21   5   57.13    2.31
   4 -21   5   55.78    2.27
  -4  21  -5   57.33    2.32
  -4 -22   5   89.41    3.06
  -4 -22   5   91.74    3.03
  -4 -22   5  103.24    3.25
  -4 -22   5   93.09    3.36
  -4 -22   5   94.52    3.27
  -4  22   5   92.35    2.76
  -4  22   4   38.74    1.99
  -4 -22   4   36.87    2.13
  -4 -22   4   40.37    2.22
  -4 -22   4   35.69    2.02
  -4 -22   4   37.90    2.25
  -4  22   3   53.31    2.57
  -4 -22   3   48.37    2.53
  -4 -22   3   46.54    2.53
  -4 -22   3   47.37    2.70
  -4 -22   2   37.45    2.31
  -4 -22   2   39.93    2.40
  -4  22   2   43.72    2.47
   4  22  -1   42.63    2.55
  -4 -22   1   42.94    2.54
  -4  22   0   18.95    1.71
   4  22   0   18.15    1.64
  -4  22  -1   17.34    1.60
   4 -22   1   16.89    1.46
   4  22   1   15.63    1.45
  -4  22  -2   23.38    1.75
   4 -22   2   23.80    1.76
   4 -22   2   23.47    1.58
  -4  22  -2   24.68    1.72
   4  22   2   28.57    1.71
  -4  22  -3   48.30    2.30
   4 -22   3   53.70    2.51
   4 -22   3   53.86    2.54
   4 -22   3   54.56    2.36
   4 -22   3   53.34    2.38
  -4  22  -3   55.09    2.48
  -4  22  -4  192.67    4.45
   4 -22   4  192.26    4.75
   4 -22   4  200.32    4.98
   4 -22   4  205.10    5.10
   4 -22   4  199.98    4.81
  -4  22  -4  194.66    4.86
  -4  23   4   -0.20    0.38
  -4 -23   4    0.30    0.44
  -4 -23   4   -0.10    0.48
  -4 -23   4    0.38    0.44
  -4  23   3    0.19    0.39
  -4 -23   3    0.51    0.44
  -4 -23   3    0.25    0.48
   4  23  -2   17.49    1.49
  -4  23   2   17.27    1.46
  -4 -23   2   13.80    1.28
  -4 -23   2   15.98    1.48
   4  23  -1    6.01    0.95
  -4 -23   1    5.06    0.86
  -4  23   1    5.89    0.95
   4  23   0    1.80    0.65
  -4  23   0    1.60    0.68
   4  23   1    3.77    0.67
  -4  23  -1    3.09    0.75
   4 -23   1    2.07    0.65
   4 -23   1    3.68    0.74
  -4  23  -2   70.86    2.81
   4 -23   2   69.77    2.85
   4 -23   2   69.85    2.80
   4 -23   2   66.59    2.70
   4 -23   3  121.20    3.61
  -4  23  -3  117.71    3.41
   4 -23   3  123.04    3.70
   4 -23   3  123.14    3.64
  -4  23  -3  116.34    3.31
   4  24  -4    0.19    0.30
  -4  24   3   44.38    1.88
  -4 -24   3   43.13    2.03
  -4 -24   3   39.82    2.00
  -4 -24   3   41.83    1.99
   4  24  -3   40.64    1.97
   4  24  -2    0.21    0.42
  -4  24   2   -0.24    0.46
  -4 -24   2   -0.82    0.49
  -4 -24   2   -0.03    0.45
   4  24  -1    2.91    0.63
  -4 -24   1    2.41    0.58
   4 -24  -1    3.84    0.69
  -4 -24   1    2.85    0.64
  -4  24   1    1.63    0.53
  -4  24   0   54.55    2.44
  -4 -24   0   49.88    2.22
   4 -24   0   53.87    2.32
   4  24   0   55.84    2.38
   4  24   1    0.60    0.44
  -4  24  -1    0.40    0.49
   4 -24   1    0.27    0.48
  -4  24  -2   65.53    2.42
   4 -24   2   64.18    2.27
   4 -24   2   66.01    2.33
   4 -24   2   67.63    2.54
   4 -24   3   95.42    2.78
   4  25  -2    0.51    0.35
  -4  25   2    0.28    0.32
  -4 -25   2    0.46    0.38
   4  25  -1    3.63    0.63
  -4  25   1    3.36    0.60
  -4  25   0   19.56    1.27
   4  25   0   20.91    1.24
   4 -25   1   35.17    1.60
  -4  25  -1   35.38    1.62
  -5   0   9    0.84    0.77
  -5   0   9    1.01    0.65
  -5   0   8  204.96    6.65
  -5   0   8  206.70    6.56
  -5   0   8  222.22    7.89
  -5   0   7   -0.56    0.83
  -5   0   7    0.30    0.78
  -5   0   6  886.54   17.59
  -5   0   6  902.93   19.62
  -5   0   6  876.29   19.19
  -5   0   5    0.51    0.59
  -5   0   5   -0.43    0.81
  -5   0   5    0.11    0.92
  -5   0   4  311.97    7.85
  -5   0   4  329.50    8.30
  -5   0   4  309.03    8.54
  -5   0   4  315.50    9.19
  -5   0   3   -0.34    0.53
  -5   0   2   21.19    1.84
  -5   0   1    0.17    0.60
  -5   0   0  501.57   11.20
  -5   0  -1    2.40    0.82
  -5   0  -2  956.35   17.57
  -5   0  -3   -0.51    0.69
   5   0   3   -0.68    0.60
   5   0   3    0.20    0.62
   5   0   4  235.14    7.53
   5   0   4  241.45    7.00
   5   0   4  240.60    7.36
  -5   0  -4  229.90    7.34
  -5   0  -5    0.82    0.84
   5   0   5    0.62    0.75
   5   0   5    0.00    0.68
   5   0   6    5.67    1.22
   5   0   6    6.46    1.38
   5   0   7    0.18    0.63
   5   0   7   -0.59    0.95
   5   0   8   36.11    2.29
   5   0   9   -0.06    0.48
  -5   1   9   13.09    1.66
  -5  -1   9    8.08    1.37
  -5   1   9   10.05    1.25
  -5  -1   9   11.26    1.27
  -5   1   8   10.92    1.57
  -5   1   8   11.94    1.84
  -5   1   8   10.65    1.47
  -5  -1   8    9.77    1.45
  -5  -1   8   11.46    1.89
  -5  -1   7   55.83    3.31
  -5   1   7   56.41    3.36
  -5  -1   7   58.28    3.46
  -5   1   7   53.74    3.91
  -5  -1   7   53.29    3.93
  -5  -1   6   80.13    3.96
  -5   1   6   84.92    4.04
  -5   1   6   90.83    5.01
  -5  -1   6   88.24    4.95
  -5  -1   6   82.00    4.72
  -5   1   6   79.21    4.56
  -5  -1   5  109.28    4.41
  -5   1   5  110.55    4.43
  -5   1   5  109.66    5.31
  -5   1   5  102.69    4.86
  -5  -1   5  104.02    4.71
  -5  -1   5  109.53    5.28
  -5   1   5  106.64    5.16
  -5  -1   4   21.89    1.82
  -5   1   4   24.36    1.93
  -5  -1   4   23.74    1.95
  -5   1   4   21.50    1.82
  -5   1   4   21.64    2.01
  -5  -1   4   21.62    2.00
  -5  -1   4   20.54    2.17
  -5   1   4   24.37    2.28
  -5  -1   3    1.54    0.68
  -5   1   3    0.76    0.60
  -5  -1   2   86.65    3.77
  -5   1   2   85.94    3.74
  -5  -1   1  691.35   13.98
  -5   1   1  695.39   14.02
  -5  -1   0  717.80   14.44
  -5   1   0  711.40   14.44
  -5  -1  -1   26.72    2.17
  -5   1  -1   25.35    1.73
  -5   1  -1   25.81    2.16
  -5  -1  -2  213.60    6.29
  -5   1  -2  200.83    5.88
   5   1   3   64.58    3.59
   5  -1   3   69.30    3.46
   5   1   3   63.13    3.40
   5  -1   3   66.01    3.49
  -5  -1  -3   65.09    3.48
  -5   1  -3   65.48    3.30
   5   1   4   23.70    2.21
  -5  -1  -4   17.20    1.97
  -5   1  -4   17.87    1.93
   5   1   4   16.95    1.93
   5  -1   4   17.74    1.99
   5  -1   4   22.58    2.02
   5   1   4   18.88    1.95
   5  -1   4   20.46    2.00
   5   1   5   24.26    2.31
   5  -1   5   23.97    2.25
  -5   1  -5   22.11    2.33
   5  -1   5   22.12    2.29
   5   1   5   20.72    2.25
   5  -1   5   23.20    2.16
   5   1   6    5.95    1.26
   5  -1   6    5.74    1.29
   5   1   6    7.42    1.49
   5  -1   6    6.43    1.32
   5   1   7    1.54    0.85
   5  -1   7    0.78    0.82
   5   1   7    0.68    0.68
   5  -1   7    1.43    0.92
   5   1   8   11.01    1.36
   5  -1   8    8.01    1.14
   5  -1   8    6.66    1.10
   5   1   8    9.43    1.28
   5   1   9    3.82    0.66
   5  -1   9    3.85    0.68
  -5  -2   9    1.58    0.79
  -5   2   9    1.58    0.73
  -5  -2   9    1.23    0.66
  -5   2   9    0.51    0.71
  -5   2   8   43.38    2.82
  -5  -2   8   44.56    2.90
  -5   2   8   40.53    3.22
  -5  -2   8   45.69    3.40
  -5   2   8   44.23    2.84
  -5  -2   7   10.93    1.59
  -5   2   7   12.66    1.69
  -5   2   7   14.96    2.11
  -5  -2   7   12.01    1.97
  -5  -2   6  525.41   12.10
  -5   2   6  543.31   12.19
  -5   2   6  525.08   13.67
  -5  -2   6  509.63   13.67
  -5  -2   6  528.08   13.78
  -5   2   6  538.06   13.42
  -5  -2   5  144.33    5.22
  -5   2   5  159.24    5.45
  -5   2   5  146.88    6.25
  -5   2   5  153.32    6.10
  -5  -2   5  148.78    6.36
  -5   2   5  159.79    6.31
  -5  -2   4    3.21    0.92
  -5  -2   4    4.46    0.96
  -5   2   4    2.99    0.78
  -5  -2   4    3.25    0.96
  -5   2   4    4.47    1.10
  -5  -2   4    3.20    0.81
  -5  -2   4    5.21    1.25
  -5   2   4    3.26    0.89
  -5  -2   3  435.43   10.15
  -5   2   3  438.19   10.00
  -5  -2   2  367.28    8.94
  -5   2   2  359.34    8.83
  -5  -2   1  503.76   11.12
  -5   2   1  500.47   11.13
  -5  -2   0  307.63    8.03
  -5   2   0  292.69    7.98
  -5  -2  -1    9.10    1.32
   5   2   1    9.65    1.10
  -5  -2  -2   59.46    3.17
  -5  -2  -2   58.42    3.31
  -5   2  -2   55.57    2.73
   5   2   3   18.57    1.93
   5  -2   3   21.02    1.92
   5   2   3   20.96    1.96
   5  -2   3   21.12    2.02
  -5  -2  -3   19.89    1.97
  -5   2  -3   20.02    1.76
  -5  -2  -4   11.37    1.69
   5   2   4    9.07    1.45
  -5   2  -4   11.30    1.55
   5   2   4    8.50    1.48
   5  -2   4   12.61    1.69
   5  -2   4    9.94    1.44
   5   2   4    9.86    1.50
   5  -2   4   12.63    1.61
   5   2   5    0.02    0.83
   5  -2   5    1.07    0.74
   5   2   5   -0.70    0.88
   5  -2   5    1.03    0.85
   5  -2   5   -0.08    0.71
   5   2   6    1.83    0.98
   5  -2   6    1.33    0.79
   5  -2   6    0.38    0.77
   5   2   6    1.39    1.01
   5   2   7   21.06    2.05
   5  -2   7   20.31    1.98
   5   2   7   19.71    2.13
   5  -2   7   20.49    2.09
   5   2   8    5.79    1.04
   5  -2   8    5.87    0.97
   5  -2   8    6.23    1.03
   5   2   8    5.44    1.10
   5   2   9   65.03    2.50
   5  -2   9   65.55    2.50
  -5   3   9    1.45    0.78
  -5  -3   9    2.08    0.88
  -5   3   9    2.05    0.79
  -5  -3   9    2.43    0.69
  -5   3   8  221.00    6.78
  -5   3   8  231.33    6.89
  -5  -3   8  229.12    7.05
  -5   3   8  222.66    7.86
  -5  -3   8  221.79    7.91
  -5   3   7  403.32   10.19
  -5   3   7  397.45   11.59
  -5  -3   7  426.15   12.02
  -5   3   6  591.50   12.85
  -5   3   6  561.14   14.24
  -5  -3   6  588.90   14.62
  -5  -3   6  555.40   14.37
  -5   3   6  553.11   13.75
  -5  -3   6  554.17   12.65
  -5  -3   5  340.88    8.82
  -5   3   5  361.55    9.00
  -5   3   5  348.23   10.17
  -5   3   5  351.14   10.04
  -5  -3   5  344.85   10.39
  -5   3   5  355.49   10.07
  -5  -3   4    0.19    0.57
  -5  -3   4   -0.53    0.49
  -5   3   4    1.05    0.57
  -5  -3   4    0.09    0.52
  -5  -3   4    0.08    0.61
  -5   3   4    0.79    0.84
  -5  -3   4    0.11    0.77
  -5   3   4    2.36    0.83
  -5  -3   3   62.45    3.29
  -5   3   3   66.56    3.25
  -5  -3   2   32.46    2.33
  -5   3   2   34.49    2.33
  -5  -3   1    7.80    1.15
  -5   3   1    9.75    1.29
  -5   3   0  225.98    5.39
  -5  -3   0  206.88    6.44
   5   3   1  686.40   12.79
  -5  -3  -1  642.29   13.84
   5   3   2   47.61    2.73
  -5  -3  -2   45.58    2.92
   5  -3   3   83.48    3.80
   5   3   3   82.63    4.00
   5   3   3   85.61    3.90
   5  -3   3   78.16    3.77
   5   3   3   79.32    3.89
  -5  -3  -3   77.98    4.02
   5  -3   3   80.10    3.97
   5  -3   3   82.06    3.92
  -5   3  -3   88.58    3.94
   5   3   4   59.48    3.56
   5   3   4   67.87    3.94
   5   3   4   67.92    3.93
   5  -3   4   64.34    3.44
   5  -3   4   65.01    3.64
  -5  -3  -4   67.15    3.90
   5   3   5    8.34    1.52
   5   3   5    5.87    1.44
   5  -3   5    7.78    1.40
   5  -3   5    7.04    1.38
   5   3   6  176.26    6.55
   5  -3   6  177.92    6.27
   5   3   6  174.31    6.77
   5  -3   6  181.57    6.59
   5  -3   6  185.90    6.12
   5   3   7    4.06    1.05
   5  -3   7    3.95    1.05
   5  -3   7    4.21    1.07
   5   3   8   19.00    1.71
   5  -3   8   16.91    1.51
   5  -3   8   19.87    1.75
   5   3   8   18.19    1.72
   5   3   9  110.48    3.32
  -5  -4   9   17.23    1.54
  -5  -4   9   22.35    2.04
  -5   4   9   22.47    2.07
  -5   4   8  220.69    6.70
  -5   4   8  221.53    7.73
  -5  -4   8  220.62    7.79
  -5   4   7   10.53    1.51
  -5   4   7   12.59    1.97
  -5  -4   7   11.52    1.87
  -5  -4   6  478.56   11.61
  -5   4   6  524.07   11.86
  -5   4   6  488.19   13.05
  -5  -4   6  513.41   13.46
  -5   4   6  525.65   12.86
  -5  -4   5   -0.11    0.74
  -5   4   5   -0.39    0.66
  -5   4   5   -0.22    0.82
  -5  -4   5    0.32    0.64
  -5  -4   5    0.58    0.86
  -5  -4   5    0.30    0.71
  -5  -4   5    1.12    0.84
  -5   4   5    0.49    0.93
  -5  -4   5    1.19    0.90
  -5   4   5   -0.55    0.93
  -5  -4   4   34.10    2.29
  -5  -4   4   38.68    2.52
  -5  -4   4   42.98    2.83
  -5  -4   4   43.44    2.81
  -5  -4   4   44.33    3.03
  -5   4   4   41.14    2.50
  -5   4   4   37.06    2.83
  -5  -4   4   32.52    2.80
  -5   4   4   43.17    2.99
  -5  -4   3  490.92   11.27
  -5   4   3  510.60   11.82
  -5   4   3  496.66   11.00
  -5  -4   2   91.09    4.02
  -5   4   2   97.28    4.04
  -5   4   1   29.35    1.72
  -5  -4   1   27.25    2.16
  -5   4   0  188.82    5.06
  -5  -4   0  198.68    6.20
   5   4   1  157.52    4.84
  -5  -4  -1  157.24    5.53
   5   4   2  306.76    7.88
  -5  -4  -2  275.62    8.03
   5   4   3   46.94    3.02
   5  -4   3   50.25    2.94
   5   4   3   56.47    3.30
   5   4   3   52.28    3.37
   5  -4   3   54.89    3.10
   5   4   3   50.77    3.09
  -5  -4  -3   49.24    3.26
   5  -4   3   57.10    3.37
   5  -4   3   56.40    3.29
  -5  -4  -4    2.32    0.87
   5   4   4    5.53    1.23
   5  -4   4    3.01    0.89
   5   4   4    1.29    0.91
   5   4   4    2.00    0.89
   5  -4   4    4.57    1.06
   5  -4   4    1.82    0.91
   5   4   5   11.86    1.73
   5  -4   5    9.38    1.37
   5  -4   5    8.08    1.34
   5   4   5    9.23    1.73
   5  -4   5    8.61    1.42
   5   4   6  349.82    9.95
   5  -4   6  364.89    9.54
   5  -4   6  374.93    9.97
   5  -4   6  368.62    9.44
   5   4   7   64.80    3.60
   5  -4   7   62.87    3.30
   5  -4   7   55.25    3.28
   5   4   7   63.15    3.66
   5   4   8   39.03    2.41
   5  -4   8   39.83    2.25
   5  -4   8   42.59    2.45
   5   4   8   40.82    2.51
  -5  -5   9  140.98    4.63
  -5   5   9  147.56    5.29
  -5  -5   9  150.16    5.33
  -5   5   8   61.94    3.24
  -5   5   8   51.63    3.50
  -5  -5   8   60.35    3.80
  -5   5   7   36.20    2.63
  -5  -5   7   35.95    3.15
  -5  -5   7   37.98    2.78
  -5   5   7   33.66    2.99
  -5   5   6   96.35    4.32
  -5   5   6   85.80    4.79
  -5  -5   6   97.22    5.22
  -5  -5   6   96.20    4.61
  -5   5   6   90.37    4.64
  -5  -5   5  300.68    8.32
  -5   5   5  343.13    8.67
  -5   5   5  329.15    9.74
  -5  -5   5  331.07    8.92
  -5  -5   5  331.08    9.26
  -5  -5   5  344.77    9.14
  -5  -5   5  319.06    9.61
  -5   5   5  314.48    9.77
  -5  -5   5  311.08    9.90
  -5   5   5  330.53    9.51
  -5   5   4  331.51    8.14
  -5  -5   4  308.05    8.20
  -5  -5   4  325.11    8.82
  -5  -5   4  302.58    8.48
  -5   5   4  317.22    9.06
  -5  -5   4  319.86    9.16
  -5   5   4  317.97    9.30
  -5  -5   4  294.16    9.22
  -5   5   4  315.38    8.93
  -5  -5   4  285.48    7.66
  -5  -5   3    2.70    0.89
  -5   5   3    3.09    0.94
  -5   5   2  189.17    5.20
  -5  -5   2  191.99    6.19
  -5   5   1   75.23    3.00
  -5  -5   1   77.99    3.70
  -5   5   0  326.69    7.41
  -5  -5   0  315.16    8.42
   5   5   1  211.14    5.88
  -5  -5  -1  200.51    6.45
   5  -5   2  178.61    5.68
   5  -5   2  167.88    5.66
   5   5   2  176.79    5.76
   5   5   2  166.78    6.07
   5  -5   2  171.85    5.78
  -5  -5  -2  176.96    6.05
   5  -5   2  174.62    5.99
   5   5   3   90.33    4.25
   5  -5   3   86.71    3.98
   5  -5   3   86.69    4.04
   5   5   3   97.48    4.48
   5   5   3   86.49    4.43
   5  -5   3   85.92    4.01
   5   5   3   98.40    4.34
  -5  -5  -3   83.75    4.36
   5  -5   3   89.29    4.31
   5  -5   3   88.76    4.35
   5   5   4   50.30    3.29
   5  -5   4   52.68    3.09
   5   5   4   49.48    3.44
   5   5   4   51.79    3.52
   5  -5   4   54.05    3.19
   5  -5   4   47.18    3.18
  -5  -5  -4   51.34    3.54
   5   5   5   20.26    2.21
   5   5   5   22.03    2.39
   5  -5   5   24.70    2.14
   5  -5   5   19.79    2.08
   5   5   6   21.86    2.29
   5  -5   6   19.94    1.99
   5  -5   6   23.42    2.25
   5   5   6   25.55    2.53
   5  -5   6   22.62    2.15
   5   5   7    2.85    1.01
   5  -5   7    1.47    0.88
   5  -5   7    2.71    0.98
   5   5   7    1.59    0.94
   5   5   8    2.74    0.79
   5  -5   8    2.73    0.74
   5  -5   8    4.06    0.83
   5   5   8    1.91    0.74
  -5   6   9    2.53    0.68
  -5  -6   9    3.36    0.85
  -5  -6   9    1.94    0.70
  -5   6   8   59.23    3.13
  -5   6   8   51.16    3.39
  -5  -6   8   49.85    2.90
  -5  -6   8   52.67    3.47
  -5   6   7  121.25    4.90
  -5   6   7  110.54    5.40
  -5  -6   7  121.34    5.74
  -5  -6   7  117.21    5.07
  -5   6   6   98.42    4.37
  -5   6   6   95.86    5.01
  -5  -6   6   92.63    5.07
  -5  -6   6   94.63    4.66
  -5  -6   5   10.22    1.58
  -5   6   5   10.56    1.43
  -5   6   5    7.84    1.49
  -5  -6   5    8.50    1.44
  -5  -6   5   14.93    1.85
  -5  -6   5   11.43    1.69
  -5  -6   5   11.10    1.75
  -5   6   5    8.57    1.58
  -5  -6   5   11.02    1.80
  -5   6   5   11.79    1.76
  -5   6   4  200.83    6.95
  -5  -6   4  200.78    6.41
  -5  -6   4  209.03    6.80
  -5  -6   4  199.65    6.78
  -5  -6   4  206.20    7.16
  -5   6   4  197.71    7.20
  -5  -6   4  189.24    7.18
  -5   6   4  193.34    6.73
  -5   6   4  217.48    6.33
  -5  -6   3    1.23    0.69
  -5   6   3    1.87    0.74
  -5  -6   3    1.39    0.73
  -5  -6   3    3.11    0.97
  -5  -6   3    1.86    0.90
  -5   6   3    1.33    0.74
  -5  -6   3    2.19    1.01
   5   6  -3    2.11    0.82
  -5   6   3    2.01    0.91
  -5   6   2   53.44    2.61
  -5  -6   2   45.44    2.90
  -5   6   1  167.57    4.95
  -5  -6   1  164.47    5.69
  -5  -6   0    0.39    0.69
  -5   6   0    0.06    0.39
  -5   6  -1 1039.84   18.39
   5   6   1 1054.50   18.80
  -5  -6  -1 1039.73   19.69
   5  -6   2  196.25    6.12
   5  -6   2  197.84    6.22
   5   6   2  193.15    6.27
   5   6   2  198.56    6.78
   5  -6   2  206.00    6.90
   5  -6   2  204.83    6.39
  -5  -6  -2  198.92    6.51
   5  -6   2  195.91    6.52
   5   6   3  101.12    4.62
   5  -6   3   99.02    4.38
   5   6   3  103.50    4.75
   5  -6   3  100.17    4.31
   5   6   3  105.23    4.95
   5  -6   3  101.96    4.44
  -5  -6  -3   99.31    4.86
   5  -6   3  104.21    4.73
   5  -6   3  100.00    4.75
  -5  -6  -4   13.98    1.95
   5   6   4   15.45    1.95
   5  -6   4   13.74    1.66
   5  -6   4   15.51    1.79
   5   6   4   13.32    1.85
   5   6   4   12.83    1.86
   5  -6   4   15.67    1.76
   5  -6   4   14.09    1.83
   5   6   5  693.84   15.61
   5   6   5  687.56   15.88
   5  -6   5  696.94   14.52
   5  -6   5  702.33   15.28
   5   6   6    5.70    1.28
   5  -6   6    6.96    1.28
   5   6   6    9.01    1.57
   5  -6   6    6.46    1.23
   5   6   7  277.65    8.06
   5  -6   7  281.81    7.43
   5  -6   7  275.46    7.59
   5   6   7  279.02    8.16
   5  -6   7  285.65    7.26
   5  -6   8  126.19    3.91
   5  -6   8  129.82    4.11
   5   6   8  129.81    4.46
  -5   7   9   24.73    1.64
  -5  -7   9   21.13    1.63
  -5  -7   9   23.58    1.88
  -5   7   8   61.30    3.11
  -5  -7   8   58.45    3.55
  -5  -7   8   64.04    3.30
  -5   7   8   55.75    3.40
  -5   7   7    9.75    1.41
  -5   7   7   10.88    1.72
  -5  -7   7   11.63    1.87
  -5  -7   7   10.37    1.58
  -5   7   6  240.77    7.29
  -5   7   6  236.26    8.12
  -5  -7   6  243.49    8.46
  -5  -7   6  240.69    7.93
  -5  -7   5   -0.26    0.78
  -5   7   5    0.32    0.60
  -5   7   5    0.67    0.79
  -5  -7   5    0.20    0.71
  -5  -7   5    2.25    1.01
  -5  -7   5    1.29    0.91
  -5  -7   5    2.91    1.13
  -5   7   5   -0.35    0.93
  -5   7   5    1.65    1.12
  -5   7   4  302.37    7.89
  -5  -7   4  296.16    8.16
  -5  -7   4  286.30    8.44
  -5  -7   4  285.38    8.50
  -5  -7   4  286.19    8.84
  -5   7   4  290.59    9.15
  -5  -7   4  271.69    8.93
  -5   7   4  296.88    8.57
  -5  -7   3    8.80    1.37
  -5   7   3    8.44    1.15
  -5  -7   3    6.20    1.21
  -5  -7   3   11.20    1.55
  -5  -7   3    8.80    1.42
  -5   7   3    8.36    1.46
  -5  -7   3    6.00    1.26
   5   7  -3    6.27    1.40
  -5   7   3    7.64    1.35
  -5   7   2  165.56    5.17
  -5  -7   2  176.69    6.07
  -5   7   2  173.54    6.15
  -5  -7   1    6.78    1.19
  -5   7   1    7.45    1.02
  -5   7   0  494.34   10.58
  -5  -7   0  507.50   11.61
  -5   7  -1   12.09    1.56
  -5  -7  -1    9.92    1.44
  -5   7  -1   12.25    1.35
   5  -7   1   10.23    1.36
   5   7   1   12.29    1.41
   5   7   1   10.64    1.57
   5  -7   1    8.69    1.26
   5  -7   2  146.41    5.17
   5  -7   2  147.05    5.27
   5   7   2  141.39    5.31
   5   7   2  147.86    5.78
  -5  -7  -2  144.32    5.42
   5  -7   2  142.24    5.31
   5  -7   2  136.84    5.67
   5   7   2  145.61    5.49
   5  -7   2  142.24    5.48
   5   7   2  139.54    5.58
   5   7   3  111.37    4.95
   5  -7   3  115.19    4.67
   5  -7   3  114.16    4.74
   5   7   3  102.03    4.84
   5   7   3  113.31    5.20
   5  -7   3  115.94    4.80
  -5  -7  -3  108.61    5.19
   5  -7   3  103.37    4.79
   5  -7   3  106.78    5.05
  -5  -7  -4    2.22    1.07
   5   7   4    1.53    0.90
   5  -7   4    2.21    0.88
   5  -7   4    2.84    0.91
   5   7   4    1.72    0.96
   5  -7   4    1.69    0.85
   5  -7   4    2.99    0.98
   5  -7   4    1.50    0.93
   5   7   5  179.91    6.74
   5  -7   5  164.76    5.82
   5   7   5  169.17    6.75
   5  -7   5  180.38    6.08
   5  -7   5  179.54    6.53
   5   7   6   10.66    1.69
   5   7   6   12.66    1.81
   5  -7   6   11.38    1.55
   5   7   7   62.47    3.44
   5  -7   7   62.12    3.11
   5   7   7   65.93    3.57
   5  -7   7   64.49    3.09
  -5   7  -8   80.20    3.07
   5  -7   8   76.01    2.86
   5   7   8   82.80    3.34
  -5   8   9   24.46    1.58
  -5  -8   9   27.00    1.87
  -5   8   8   60.60    3.04
  -5  -8   8   60.39    3.48
  -5  -8   8   61.26    3.26
  -5   8   8   58.51    3.35
  -5   8   7   47.67    2.92
  -5   8   7   49.09    3.33
  -5  -8   7   51.90    3.58
  -5  -8   7   48.59    3.26
  -5   8   6   19.97    1.95
  -5   8   6   22.80    2.30
  -5  -8   6   22.01    2.47
  -5  -8   6   20.95    2.25
  -5  -8   6   23.63    2.04
  -5   8   5  166.93    5.77
  -5  -8   5  162.67    6.04
  -5  -8   5  179.84    6.75
  -5  -8   5  165.30    6.29
  -5  -8   5  163.86    6.41
  -5  -8   5  164.54    5.81
  -5  -8   5  159.41    6.58
  -5   8   4   39.48    2.59
  -5  -8   4   39.13    2.76
  -5  -8   4   40.68    2.96
  -5  -8   4   41.86    3.00
  -5  -8   4   43.22    3.22
  -5   8   4   41.40    3.26
  -5  -8   4   40.78    3.22
  -5   8   4   36.32    2.79
  -5   8   3  225.69    6.47
  -5  -8   3  241.18    7.34
  -5  -8   3  221.63    7.23
  -5  -8   3  218.60    7.15
  -5  -8   3  217.55    7.41
  -5   8   3  218.26    7.55
  -5  -8   3  207.19    7.34
  -5   8   3  221.20    7.02
  -5   8   2  172.00    5.44
  -5   8   2  176.33    5.49
  -5  -8   2  185.13    6.21
  -5  -8   2  174.57    6.17
  -5   8   2  166.03    6.12
  -5   8   2  171.03    5.92
   5   8  -2  165.60    6.43
  -5   8   1  244.58    6.73
  -5  -8   1  240.28    7.41
  -5   8   1  239.58    7.35
   5   8  -1  229.60    7.67
  -5   8   0   75.79    3.45
  -5  -8   0   82.49    4.00
   5   8   0   89.00    4.25
  -5   8   0   79.89    3.90
  -5   8  -1   23.28    1.91
   5  -8   1   22.07    1.89
   5  -8   1   25.12    1.99
   5   8   1   21.68    1.90
  -5  -8  -1   23.20    2.15
   5   8   1   20.16    2.13
   5  -8   1   22.21    2.00
   5  -8   1   23.01    2.06
  -5   8  -1   23.58    2.13
   5   8   1   25.66    2.33
  -5   8  -2    1.87    0.82
  -5  -8  -2    2.65    0.90
   5  -8   2   -0.29    0.60
   5  -8   2    0.18    0.63
   5   8   2   -0.61    0.86
   5  -8   2    2.39    0.97
   5   8   2    0.85    0.78
   5  -8   2    0.76    0.64
   5  -8   2    0.66    0.80
   5   8   2   -0.10    0.83
   5  -8   3  339.74    8.88
   5  -8   3  341.35    9.10
   5   8   3  347.24    9.72
   5  -8   3  334.23    9.37
   5   8   3  337.45    9.77
   5  -8   3  332.30    9.11
  -5  -8  -3  312.30    9.66
   5  -8   3  328.25    9.36
   5  -8   3  333.01    9.86
   5  -8   4   26.60    2.64
   5   8   4   30.92    2.73
   5  -8   4   26.50    2.26
   5  -8   4   27.22    2.38
   5   8   4   28.39    2.68
   5  -8   4   30.05    2.42
   5  -8   4   25.83    2.43
   5   8   5  216.47    7.55
   5  -8   5  201.09    6.51
   5   8   5  211.45    7.59
   5  -8   5  226.97    6.93
   5  -8   5  210.06    7.20
   5   8   6   62.17    3.75
   5   8   6   62.47    3.80
   5  -8   6   67.77    3.25
   5  -8   6   61.37    3.46
   5   8   7   71.97    3.63
   5  -8   7   71.34    3.23
  -5   8  -8   46.63    2.23
   5   8   8   44.66    2.30
  -5   9   9   28.82    1.62
  -5  -9   9   19.35    1.47
  -5   9   8   44.86    2.50
  -5  -9   8   46.10    2.79
  -5  -9   8   44.50    2.83
  -5   9   7   -0.51    0.64
  -5  -9   7   -1.47    0.83
  -5  -9   7    0.62    0.74
  -5   9   7    0.30    0.73
  -5   9   6   80.08    3.94
  -5  -9   6   89.75    4.80
  -5  -9   6   85.03    4.56
  -5  -9   6   95.42    4.29
  -5   9   5   13.53    1.68
  -5  -9   5   13.34    1.80
  -5  -9   5   15.96    2.04
  -5  -9   5   16.23    2.03
  -5  -9   5   16.11    1.78
  -5  -9   5   15.09    2.11
  -5   9   4    5.55    1.07
  -5  -9   4    6.57    1.30
  -5  -9   4    4.90    1.20
  -5  -9   4    6.33    1.49
  -5   9   4    7.16    1.55
  -5   9   4    4.64    1.16
  -5  -9   4    4.52    1.17
  -5   9   3  118.29    4.53
  -5  -9   3  120.91    5.07
  -5  -9   3  109.02    4.97
  -5  -9   3  114.25    5.01
  -5  -9   3  115.48    5.27
  -5   9   3  114.41    5.36
  -5  -9   3  115.97    5.30
  -5   9   3  115.03    4.86
  -5   9   2   23.29    1.95
  -5   9   2   24.07    1.94
  -5  -9   2   24.42    2.22
  -5  -9   2   21.73    2.18
  -5   9   2   20.71    2.17
  -5   9   2   22.11    2.03
   5   9  -2   27.33    2.53
  -5   9   1   47.08    2.75
  -5   9   1   50.57    2.76
  -5  -9   1   54.80    3.27
  -5  -9   1   48.58    3.15
  -5   9   1   48.52    3.10
   5  -9  -1   56.65    3.04
  -5   9   1   50.10    3.08
   5   9  -1   47.67    3.34
  -5   9   0  108.17    4.35
   5  -9   0  111.84    4.30
   5  -9   0  123.16    4.51
  -5  -9   0  119.30    4.98
   5   9   0  110.88    4.95
  -5   9   0  108.31    4.57
   5  -9   0  117.59    4.62
   5  -9   0  116.36    4.66
  -5   9   0  120.80    4.89
   5   9   0  109.71    5.07
  -5   9  -1   23.12    2.00
  -5   9  -1   16.84    1.71
   5  -9   1   19.61    1.84
   5  -9   1   20.25    1.90
  -5  -9  -1   20.28    2.00
   5   9   1   20.49    2.10
   5  -9   1   18.75    1.93
  -5   9  -1   20.78    2.05
   5   9   1   17.94    2.03
  -5   9  -2  164.03    5.55
  -5   9  -2  162.51    5.63
   5  -9   2  160.81    5.63
   5  -9   2  156.73    5.66
   5   9   2  164.58    6.08
   5  -9   2  159.79    5.86
   5   9   2  151.90    6.10
   5  -9   2  158.02    6.43
   5  -9   2  160.38    6.00
   5   9   2  156.14    6.04
   5  -9   3   82.53    4.61
  -5   9  -3   86.72    3.99
   5  -9   3   71.70    3.85
   5   9   3   78.77    4.35
   5  -9   3   80.13    4.21
   5  -9   3   75.56    3.81
   5   9   3   80.26    4.41
   5  -9   3   81.64    4.31
   5  -9   4    3.07    1.02
   5   9   4    1.58    0.94
   5  -9   4    1.64    0.97
   5  -9   4    2.42    0.91
   5  -9   4    2.87    0.99
   5  -9   5    4.72    1.05
   5  -9   5    4.60    1.18
   5   9   5    5.65    1.42
   5  -9   5    4.81    1.15
   5  -9   5    6.04    1.48
   5   9   6    2.56    0.96
   5  -9   6    3.24    0.92
   5  -9   6    1.16    0.76
  -5   9  -7    6.77    1.03
   5   9   7    7.47    1.24
   5  -9   7    9.05    1.17
  -5   9  -8    4.19    0.73
   5   9   8    5.69    0.86
  -5  10   9    3.42    0.63
  -5 -10   9    2.19    0.61
  -5  10   8   72.75    3.19
  -5 -10   8   79.51    3.64
  -5 -10   8   83.18    3.64
  -5  10   7  102.43    4.19
  -5 -10   7   97.55    4.64
  -5 -10   7  102.99    4.76
  -5  10   6  264.88    7.65
  -5 -10   6  259.91    8.52
  -5 -10   6  277.66    8.77
  -5 -10   6  270.92    7.88
  -5  10   5 1429.80   25.18
  -5 -10   5 1439.37   26.01
  -5 -10   5 1406.64   26.83
  -5 -10   5 1388.06   26.49
  -5 -10   5 1421.94   25.62
  -5  10   4   95.80    4.19
  -5 -10   4   97.39    4.50
  -5 -10   4   92.10    4.71
  -5 -10   4   90.91    4.61
  -5 -10   4   87.64    4.73
  -5  10   4   83.52    4.92
  -5  10   3  465.64   10.73
  -5 -10   3  468.85   11.45
  -5 -10   3  464.17   11.85
  -5 -10   3  472.50   11.76
  -5 -10   3  485.17   12.21
  -5  10   3  442.66   12.20
  -5  10   3  470.26   11.33
  -5 -10   2    0.90    0.88
  -5  10   2    0.29    0.59
  -5  10   2    1.61    0.75
  -5 -10   2    0.46    0.99
  -5  10   2   -0.09    0.80
  -5  10   2    0.44    0.68
  -5  10   1   78.78    3.75
  -5  10   1   83.69    3.68
   5 -10  -1   80.98    3.55
  -5 -10   1   90.71    4.32
  -5 -10   1   79.83    4.15
  -5  10   1   78.16    4.08
   5 -10  -1   89.75    3.90
  -5  10   1   86.24    4.10
   5  10  -1   79.03    4.41
  -5  10   0    4.79    1.08
  -5 -10   0    6.90    1.33
  -5  10   0    6.30    1.16
  -5  10   0    6.20    1.08
   5 -10   0    4.52    1.01
   5  10   0    6.15    1.23
   5 -10   0    8.44    1.31
  -5  10   0    5.83    1.09
   5 -10   0    9.58    1.42
   5  10   0    2.81    1.13
  -5  10  -1    2.74    1.02
  -5 -10  -1    1.59    0.94
  -5  10  -1    5.65    1.08
  -5  10  -1    2.09    0.88
   5 -10   1    3.92    1.02
   5 -10   1    3.86    0.97
   5 -10   1    4.71    1.22
   5  10   1    2.22    0.86
   5 -10   1    1.84    0.86
   5 -10   1    2.23    1.00
   5  10   1    1.37    0.78
  -5  10  -2  364.27    9.26
  -5  10  -2  378.79    9.59
   5 -10   2  377.74    9.47
   5 -10   2  358.17    9.39
   5  10   2  363.70   10.02
   5 -10   2  361.47    8.97
   5 -10   2  365.05    9.73
   5  10   2  358.56   10.18
   5 -10   2  349.62    9.75
   5 -10   2  342.46   10.37
   5  10   2  361.12   10.00
  -5  10  -3  543.51   12.29
   5 -10   3  517.20   13.55
   5 -10   3  540.37   12.26
   5 -10   3  523.65   12.38
   5  10   3  536.40   13.32
   5 -10   3  523.54   12.67
   5  10   3  526.14   13.22
   5 -10   3  540.34   12.96
  -5  10  -4    2.66    0.92
   5 -10   4    2.19    0.86
   5 -10   4    1.03    0.72
   5 -10   4    3.83    1.12
   5  10   4    2.24    1.00
   5 -10   4    3.43    1.08
   5 -10   4    1.98    0.99
  -5  10  -5  384.90    9.74
   5 -10   5  382.99    9.51
   5 -10   5  369.12    9.72
   5  10   5  379.92   10.52
   5 -10   5  370.26    9.65
   5 -10   5  372.69   10.14
  -5  10  -6   70.63    3.48
   5  10   6   63.99    3.64
   5 -10   6   65.48    3.17
   5 -10   6   67.27    3.57
  -5  10  -7   10.80    1.27
   5  10   7   11.04    1.34
   5 -10   7    8.94    1.12
  -5  10  -8   28.19    1.59
  -5  11   8    0.25    0.50
  -5 -11   8    0.40    0.57
  -5  11   7   62.55    3.15
  -5 -11   7   65.62    3.54
  -5 -11   7   60.98    3.62
  -5  11   6    4.37    1.02
  -5 -11   6    3.15    1.10
  -5 -11   6    2.62    1.07
  -5 -11   6    4.88    1.13
  -5  11   5  290.91    8.10
  -5 -11   5  280.54    8.55
  -5 -11   5  288.25    9.20
  -5 -11   5  296.42    9.13
  -5 -11   5  284.20    8.39
  -5  11   4    7.73    1.28
  -5 -11   4    7.53    1.40
  -5 -11   4    7.24    1.48
  -5 -11   4    8.94    1.63
  -5  11   3  711.66   14.50
  -5 -11   3  713.49   15.83
  -5 -11   3  701.95   15.63
  -5 -11   3  705.90   15.94
  -5  11   3  664.91   16.15
  -5  11   3  710.81   14.97
  -5  11   2  279.12    8.05
  -5  11   2  304.35    8.03
  -5 -11   2  296.74    8.49
  -5 -11   2  305.31    9.02
  -5 -11   2  287.00    8.86
  -5  11   2  285.32    8.99
  -5  11   2  299.89    8.46
  -5 -11   1    5.16    1.20
  -5  11   1    4.07    1.05
  -5  11   1    4.37    0.96
  -5 -11   1    4.05    1.01
  -5  11   1    3.46    1.08
  -5  11   1    4.07    1.07
  -5  11   0    3.15    0.95
  -5 -11   0    3.63    1.21
  -5  11   0    4.65    1.13
  -5  11   0    2.94    0.81
  -5  11   0    2.34    0.81
   5 -11   0    3.81    0.96
   5 -11   0    3.56    1.00
   5 -11   0    3.64    0.98
   5  11   0    3.67    1.06
  -5  11  -1   -0.17    0.68
  -5 -11  -1   -0.30    0.94
  -5  11  -1   -0.21    0.74
  -5  11  -1    0.12    0.71
   5 -11   1    0.17    0.67
   5 -11   1   -0.38    0.89
   5  11   1    1.67    1.00
   5 -11   1   -0.32    0.84
   5 -11   1    0.23    0.72
   5  11   1   -0.18    0.81
  -5  11  -2   43.75    2.86
  -5  11  -2   48.05    3.12
   5 -11   2   41.09    2.80
   5 -11   2   43.98    2.93
   5  11   2   47.61    3.36
   5 -11   2   47.85    2.87
   5 -11   2   46.14    3.07
   5  11   2   46.45    3.35
   5 -11   2   43.18    3.10
   5  11   2   44.68    3.18
   5 -11   2   42.31    3.33
  -5  11  -3   22.91    2.15
   5 -11   3   24.07    2.17
   5 -11   3   20.34    2.10
   5 -11   3   22.37    2.27
   5  11   3   26.35    2.58
   5 -11   3   23.28    2.36
  -5  11  -4   16.99    1.83
   5 -11   4   20.26    2.00
   5 -11   4   18.65    2.01
   5 -11   4   22.65    2.28
   5  11   4   20.08    2.23
   5 -11   4   19.24    2.03
   5 -11   4   19.51    2.18
  -5  11  -5  141.17    5.38
   5 -11   5  145.23    5.24
   5 -11   5  142.21    5.41
   5  11   5  146.68    5.93
   5 -11   5  140.57    5.32
   5 -11   5  137.07    5.59
  -5  11  -6   32.70    2.35
   5  11   6   34.69    2.59
   5 -11   6   32.25    2.15
   5 -11   6   31.04    2.37
  -5  11  -7    0.55    0.47
   5  11   7   -0.07    0.53
   5 -11   7    0.11    0.51
  -5  11  -8   10.43    0.92
  -5  12   8   12.45    1.18
  -5 -12   8   11.50    1.34
  -5  12   7    1.42    0.68
  -5 -12   7    0.43    0.69
  -5  12   6   13.61    1.59
  -5 -12   6   15.39    1.77
  -5 -12   6   13.84    1.88
  -5 -12   6   15.42    1.77
  -5  12   5  249.61    7.29
  -5 -12   5  254.63    8.11
  -5 -12   5  237.70    7.71
  -5 -12   5  234.64    8.21
  -5 -12   5  236.18    8.02
  -5 -12   5  232.26    7.53
  -5  12   4  322.07    8.58
  -5 -12   4  311.80    9.02
  -5 -12   4  312.89    9.39
  -5 -12   4  317.10    9.65
  -5  12   3    3.52    0.99
  -5 -12   3    3.08    1.11
  -5 -12   3    2.45    1.03
  -5  12   3    1.36    0.76
  -5  12   3    4.82    1.15
  -5 -12   3    4.80    1.28
  -5 -12   2    9.22    1.57
  -5  12   2   10.05    1.49
  -5  12   2    7.04    1.23
  -5 -12   2    8.94    1.48
  -5 -12   2    5.02    1.23
  -5  12   2    8.44    1.60
  -5  12   2    7.64    1.34
  -5  12   1    3.06    0.99
  -5  12   1    0.91    0.78
  -5 -12   1    0.65    0.75
  -5  12   1    0.80    0.82
   5 -12  -1   -0.22    0.82
  -5  12   1    0.86    0.79
  -5  12   0   15.84    1.83
  -5 -12   0   19.88    2.14
  -5  12   0   18.11    1.83
  -5  12   0   18.15    1.90
  -5  12   0   17.28    1.73
   5 -12   0   19.07    1.83
   5 -12   0   17.11    2.10
   5 -12   0   17.02    1.84
  -5  12  -1  155.63    5.63
  -5  12  -1  148.54    5.76
  -5  12  -1  160.42    5.37
   5 -12   1  162.98    5.71
   5 -12   1  158.66    5.70
   5  12   1  150.55    6.23
   5 -12   1  140.01    6.27
   5 -12   1  161.64    5.94
  -5  12  -1  168.57    6.20
  -5  12  -2   36.29    2.65
   5 -12   2   39.16    2.74
   5 -12   2   39.85    2.79
   5 -12   2   37.63    2.57
   5 -12   2   38.11    2.81
   5  12   2   38.32    3.07
   5 -12   2   38.59    2.92
   5 -12   2   39.39    3.26
  -5  12  -3  117.74    5.00
   5 -12   3  120.99    4.96
   5 -12   3  111.02    4.91
   5 -12   3  113.96    4.72
   5 -12   3  115.09    5.14
   5  12   3  125.82    5.65
   5 -12   3  120.46    5.38
  -5  12  -4   15.74    1.85
   5 -12   4   15.32    1.76
   5 -12   4   17.16    1.93
   5 -12   4   12.37    1.82
   5  12   4   13.49    1.88
   5 -12   4   15.62    1.99
  -5  12  -5   37.90    2.65
   5 -12   5   32.02    2.34
   5 -12   5   37.11    2.65
   5  12   5   35.65    2.82
   5 -12   5   37.28    2.62
   5 -12   5   37.03    2.80
  -5  12  -6    5.50    1.02
  -5  12  -6    5.76    0.99
   5  12   6    5.32    1.07
   5 -12   6    6.22    1.02
   5 -12   6    3.90    1.03
  -5  12  -7   -0.11    0.48
   5  12   7   -0.27    0.53
   5 -12   7   -0.48    0.48
  -5  12  -7    0.67    0.55
  -5  13   8   21.00    1.42
  -5 -13   8   18.89    1.62
  -5  13   7    5.44    0.92
  -5 -13   7    5.31    1.15
  -5 -13   7    4.59    0.89
  -5  13   6   23.02    1.93
  -5 -13   6   22.56    2.32
  -5 -13   6   23.52    2.11
  -5 -13   5    2.11    0.96
  -5 -13   5    1.64    0.76
  -5 -13   5    2.23    1.13
  -5 -13   5    1.00    0.74
  -5  13   4   15.81    1.76
  -5 -13   4   14.86    1.87
  -5 -13   4   15.21    1.97
  -5 -13   4   15.13    1.98
  -5 -13   3   46.63    3.30
  -5 -13   3   40.16    3.15
  -5  13   3   42.37    2.81
  -5  13   2   19.46    1.91
  -5 -13   2   25.21    2.30
  -5 -13   2   22.68    2.40
  -5 -13   2   18.44    2.12
  -5  13   2   21.58    2.40
  -5  13   2   22.71    2.10
  -5  13   1  300.58    8.79
  -5  13   1  309.43    8.31
  -5 -13   1  303.70    9.21
   5 -13  -1  290.07    9.37
   5 -13  -1  319.96    8.35
  -5  13   1  314.39    8.79
  -5  13   0   38.43    2.82
  -5  13   0   35.41    2.48
   5 -13   0   39.82    2.60
  -5 -13   0   35.44    2.83
   5 -13   0   32.84    2.96
  -5  13   0   38.31    2.82
  -5  13  -1   20.96    2.01
  -5  13  -1   17.50    1.72
   5 -13   1   19.89    1.96
   5 -13   1   18.61    1.94
   5 -13   1   17.40    2.24
  -5  13  -1   20.97    2.16
   5 -13   1   19.80    2.04
  -5  13  -2  128.68    5.22
   5 -13   2  123.76    5.04
   5 -13   2  121.26    5.07
   5 -13   2  125.96    4.80
   5 -13   2  123.76    5.18
   5  13   2  113.98    5.43
   5 -13   2  130.07    5.45
  -5  13  -3   20.20    2.07
   5 -13   3   20.94    2.06
   5 -13   3   20.58    2.15
   5 -13   3   17.36    1.86
   5 -13   3   21.93    2.25
   5  13   3   18.61    2.16
   5 -13   3   20.72    2.24
  -5  13  -4   30.87    2.52
   5 -13   4   34.50    2.52
   5 -13   4   30.10    2.64
   5  13   4   32.43    2.75
   5 -13   4   35.52    2.67
   5 -13   4   35.08    2.80
  -5  13  -5  113.28    4.63
   5 -13   5  108.79    4.55
   5  13   5  116.96    4.95
   5 -13   5  111.72    4.37
   5 -13   5  114.15    4.60
   5 -13   5  113.77    4.89
  -5  13  -6    0.27    0.59
  -5  13  -6    0.23    0.53
   5  13   6    0.32    0.55
   5 -13   6    1.20    0.61
   5 -13   6    0.52    0.65
  -5  13  -7    0.66    0.54
   5 -13   7    0.23    0.45
  -5  13  -7    0.97    0.52
  -5  14   8   36.72    1.74
  -5 -14   8   43.96    2.29
  -5  14   7   22.59    1.66
  -5 -14   7   22.59    2.00
  -5 -14   7   21.49    1.69
  -5  14   6   31.11    2.20
  -5 -14   6   29.91    2.60
  -5 -14   6   31.91    2.39
  -5  14   5   49.12    2.92
  -5 -14   5   59.74    3.51
  -5 -14   5   56.39    3.75
  -5 -14   5   56.02    2.98
  -5 -14   5   48.41    3.21
  -5  14   4  195.21    6.35
  -5 -14   4  200.84    6.91
  -5 -14   4  187.52    7.25
  -5 -14   4  191.21    6.99
  -5 -14   4  191.05    7.10
  -5  14   3  187.48    6.28
  -5 -14   3  190.30    6.94
  -5 -14   3  184.20    6.93
  -5  14   2   28.75    2.32
  -5 -14   2   28.64    2.35
  -5 -14   2   23.68    2.41
  -5  14   2   29.46    2.37
  -5 -14   1    4.21    1.18
  -5  14   1    3.68    0.99
  -5 -14   1    4.58    1.19
   5 -14  -1    3.76    1.25
  -5  14   1    3.89    0.96
  -5  14   0   47.22    2.91
   5 -14   0   45.11    2.77
  -5 -14   0   54.79    3.37
  -5 -14   0   44.41    3.29
  -5  14   0   47.97    3.19
  -5  14  -1   53.85    3.30
  -5  14  -1   53.09    3.03
   5 -14   1   53.50    3.19
   5 -14   1   54.96    3.33
  -5  14  -1   54.18    3.45
  -5  14  -2   30.17    2.53
  -5  14  -2   31.19    2.27
   5 -14   2   33.04    2.55
   5 -14   2   27.48    2.34
   5 -14   2   30.68    2.28
   5 -14   2   32.39    2.56
   5 -14   2   27.49    2.45
  -5  14  -3  244.38    7.70
   5 -14   3  273.48    7.81
   5 -14   3  250.79    7.74
   5 -14   3  248.76    7.35
   5 -14   3  249.96    7.86
   5  14   3  257.27    8.26
   5 -14   3  254.82    8.05
  -5  14  -4  167.99    6.03
   5 -14   4  177.75    5.97
   5 -14   4  181.58    6.21
   5 -14   4  182.61    6.44
   5  14   4  173.58    6.41
   5 -14   4  181.06    6.50
  -5  14  -5   54.90    3.12
   5 -14   5   55.24    2.90
   5 -14   5   53.24    3.04
   5  14   5   62.50    3.39
   5 -14   5   59.40    3.16
   5 -14   5   58.33    3.34
  -5  14  -6    0.66    0.60
  -5  14  -6    0.15    0.50
   5  14   6    0.22    0.47
   5 -14   6    1.31    0.58
   5 -14   6    0.94    0.67
  -5  14  -7    8.19    0.91
   5 -14   7    8.85    0.92
  -5 -15   8    4.15    0.74
  -5  15   7   15.47    1.32
  -5 -15   7   17.40    1.68
  -5 -15   7   19.80    1.57
  -5  15   6   25.63    1.91
  -5 -15   6   25.03    2.29
  -5 -15   6   22.85    1.70
  -5 -15   6   22.52    1.97
  -5  15   5    4.21    0.99
  -5 -15   5    3.08    0.94
  -5 -15   5    5.01    1.07
  -5 -15   5    4.62    1.21
  -5 -15   5    4.67    1.15
  -5  15   4    0.97    0.79
  -5 -15   4    0.31    0.75
  -5 -15   4   -0.08    0.86
  -5 -15   4   -0.17    0.72
  -5 -15   4    0.01    0.73
  -5  15   3   35.34    2.55
  -5 -15   3   38.35    2.87
  -5 -15   3   34.50    2.87
  -5 -15   3   32.71    2.77
  -5  15   2  215.17    6.74
  -5 -15   2  204.60    7.27
  -5 -15   2  196.30    7.12
  -5  15   2  211.72    6.71
  -5  15   1   84.81    4.01
  -5 -15   1   88.10    4.54
  -5  15   1   85.16    4.14
  -5  15   0  104.16    4.47
   5 -15   0  106.73    4.37
  -5 -15   0  120.97    4.97
   5 -15   0  105.23    4.61
  -5  15   0  109.24    4.85
  -5  15  -1   79.37    4.04
  -5  15  -1   71.78    3.59
   5 -15   1   80.53    3.92
   5 -15   1   84.82    4.16
  -5  15  -1   82.65    4.23
  -5  15  -2   94.03    4.45
  -5  15  -2   94.70    4.05
   5 -15   2   94.60    4.35
   5 -15   2   87.54    4.25
   5 -15   2   95.49    4.06
   5 -15   2   94.00    4.38
   5 -15   2   93.14    4.52
  -5  15  -2   94.45    4.60
  -5  15  -3  420.47   10.59
   5 -15   3  418.91   10.28
   5 -15   3  408.49   10.38
   5 -15   3  403.44    9.89
   5 -15   3  413.40   10.56
   5 -15   3  410.57   10.71
  -5  15  -4   53.85    3.21
   5 -15   4   59.06    3.18
   5 -15   4   53.54    3.18
   5 -15   4   61.75    3.44
   5 -15   4   56.33    3.38
  -5  15  -5    4.45    0.95
   5 -15   5    3.92    0.85
   5 -15   5    6.36    1.07
   5 -15   5    6.45    1.10
   5 -15   5    5.04    1.09
  -5  15  -6   66.44    2.92
   5 -15   6   69.01    2.80
   5 -15   6   67.79    3.06
  -5  15  -6   71.24    3.03
  -5  15  -7    6.97    0.75
  -5  16   7    0.35    0.43
  -5 -16   7   -0.04    0.52
  -5 -16   7    0.20    0.49
  -5  16   6    1.63    0.61
  -5 -16   6    1.79    0.90
  -5 -16   6    2.50    0.59
  -5 -16   6    0.52    0.58
  -5  16   5    4.70    0.97
  -5 -16   5    5.21    1.18
  -5 -16   5    6.32    1.08
  -5 -16   5    5.80    1.33
  -5 -16   5    4.93    1.12
  -5 -16   4  227.85    7.26
  -5 -16   4  213.80    7.62
  -5 -16   4  223.44    7.36
  -5  16   4  227.69    6.73
  -5  16   3    4.18    0.99
  -5 -16   3    3.70    1.09
  -5 -16   3    4.08    1.13
  -5 -16   3    3.52    1.16
  -5  16   2   52.17    3.13
  -5 -16   2   54.54    3.51
  -5 -16   2   55.90    3.51
  -5  16   1   17.02    1.86
  -5 -16   1   17.90    2.04
  -5  16   1   15.56    1.77
  -5  16   0   77.65    3.82
   5 -16   0   76.62    3.83
  -5  16   0   72.29    3.86
  -5  16  -1   81.13    3.84
   5 -16   1   82.78    3.96
  -5 -16  -1   95.62    4.34
   5 -16   1   89.03    4.16
  -5  16  -1   80.20    4.15
  -5  16  -2   97.24    4.50
  -5  16  -2   98.37    4.08
   5 -16   2   93.07    4.28
   5 -16   2   92.78    4.30
   5 -16   2   90.86    3.92
   5 -16   2   98.97    4.42
   5 -16   2   98.61    4.55
  -5  16  -2  101.84    4.69
  -5  16  -3   39.48    2.78
   5 -16   3   42.08    2.79
   5 -16   3   39.44    2.78
   5 -16   3   42.77    2.65
   5 -16   3   40.35    2.78
   5 -16   3   42.98    2.96
  -5  16  -4  232.76    7.02
   5 -16   4  245.37    6.86
   5 -16   4  241.13    7.05
   5 -16   4  246.22    7.17
   5 -16   4  234.94    7.21
  -5  16  -5    3.45    0.81
  -5  16  -5    3.42    0.87
   5 -16   5    4.44    0.80
   5 -16   5    5.60    1.01
   5 -16   5    4.65    0.94
   5 -16   5    4.48    0.96
  -5  16  -6    6.90    0.95
  -5  16  -6    6.51    0.90
   5 -16   6    8.01    0.93
   5 -16   6    9.91    1.09
  -5  17   7    3.63    0.60
  -5 -17   7    3.61    0.81
  -5 -17   7    3.32    0.61
  -5  17   6    3.96    0.75
  -5 -17   6    3.90    0.94
  -5 -17   6    2.76    0.63
  -5 -17   6    4.13    0.88
  -5 -17   6    3.85    0.85
  -5  17   5  193.90    5.68
  -5 -17   5  197.47    6.24
  -5 -17   5  184.74    6.49
  -5 -17   5  189.71    5.58
  -5 -17   5  199.89    6.30
  -5  17   4   18.63    1.76
  -5 -17   4   22.43    2.12
  -5 -17   4   20.34    2.19
  -5 -17   4   18.57    1.91
  -5 -17   4   24.35    2.27
  -5  17   3  135.22    5.01
  -5 -17   3  134.96    5.35
  -5 -17   3  134.26    5.44
  -5 -17   3  121.97    5.11
  -5  17   2   62.82    3.37
  -5 -17   2   65.27    3.77
  -5 -17   2   56.69    3.41
  -5  17   1   37.40    2.61
  -5 -17   1   33.75    2.64
  -5  17   1   33.91    2.50
  -5  17   0   60.62    3.30
  -5 -17   0   61.03    3.51
   5 -17   0   60.80    3.36
  -5  17   0   67.77    3.62
  -5  17  -1    5.16    1.14
  -5  17  -1    5.33    1.08
   5 -17   1    3.80    0.92
   5 -17   1    4.60    1.08
  -5  17  -2  295.38    7.76
   5 -17   2  307.55    8.33
   5 -17   2  294.58    8.21
   5 -17   2  310.95    8.51
  -5  17  -2  305.61    8.61
  -5  17  -3   48.12    2.99
  -5  17  -3   49.85    2.60
   5 -17   3   50.39    2.93
   5 -17   3   49.27    2.95
   5 -17   3   47.16    2.98
  -5  17  -3   46.61    3.02
  -5  17  -4    1.12    0.74
  -5  17  -4    2.19    0.87
   5 -17   4    0.29    0.62
   5 -17   4    1.60    0.76
   5 -17   4    1.82    0.83
   5 -17   4    0.76    0.67
  -5  17  -5   14.00    1.41
  -5  17  -5   13.93    1.38
   5 -17   5   16.29    1.36
   5 -17   5   13.24    1.31
   5 -17   5   15.99    1.47
   5 -17   5   16.91    1.56
  -5  17  -6    6.57    0.84
   5 -17   6    6.43    0.74
   5 -17   6    7.97    0.92
  -5  17  -6    7.49    0.87
  -5 -18   7   56.96    2.38
  -5  18   6   17.40    1.31
  -5 -18   6   18.81    1.66
  -5 -18   6   16.45    1.23
  -5 -18   6   15.36    1.43
  -5 -18   6   16.64    1.46
  -5  18   5   13.10    1.33
  -5 -18   5   12.54    1.46
  -5 -18   5   17.03    1.48
  -5 -18   5   13.51    1.62
  -5 -18   5   15.17    1.59
  -5  18   4    1.40    0.72
  -5 -18   4    2.28    0.89
  -5 -18   4    1.12    0.77
  -5 -18   4    1.07    0.81
  -5  18   3   17.55    1.72
  -5 -18   3   17.68    1.86
  -5 -18   3   17.08    1.99
  -5 -18   3   16.71    1.87
  -5  18   2    7.91    1.25
  -5 -18   2    5.95    1.27
  -5 -18   2    7.26    1.18
  -5  18   1   88.19    3.96
  -5 -18   1   84.00    4.19
  -5 -18   1   76.21    3.80
  -5  18   0    1.69    0.79
   5 -18   0    2.90    0.88
  -5  18   0    1.16    0.82
  -5  18  -1  168.01    5.58
   5 -18   1  171.14    5.63
   5 -18   1  174.02    5.91
  -5  18  -1  169.27    5.91
  -5  18  -2    4.18    1.05
  -5  18  -2    4.63    0.98
   5 -18   2    5.62    1.20
   5 -18   2    6.38    1.16
   5 -18   2    5.37    1.07
  -5  18  -3  101.96    3.69
   5 -18   3  103.23    4.13
   5 -18   3  108.66    4.29
   5 -18   3  106.23    4.35
   5 -18   3  107.65    4.37
  -5  18  -3  107.34    4.41
  -5  18  -4   48.78    2.68
   5 -18   4   53.19    2.66
   5 -18   4   50.45    2.68
   5 -18   4   52.45    2.78
   5 -18   4   50.92    2.80
  -5  18  -4   51.49    2.80
  -5  18  -5    5.70    0.90
   5 -18   5    6.33    0.81
   5 -18   5    6.85    0.92
   5 -18   5    7.98    1.04
  -5  19   6    4.10    0.64
  -5 -19   6    4.31    0.82
  -5 -19   6    3.78    0.77
  -5  19   5   75.35    2.96
  -5 -19   5   71.37    3.39
  -5 -19   5   74.06    2.92
  -5 -19   5   72.01    3.23
  -5  19   4  298.70    7.30
  -5 -19   4  305.83    7.85
  -5 -19   4  274.23    7.96
  -5 -19   4  295.77    7.33
  -5 -19   4  294.96    7.90
  -5  19   3    6.16    1.06
  -5 -19   3    7.73    1.27
  -5 -19   3    9.87    1.49
  -5 -19   3    7.92    1.25
  -5  19   2    2.37    0.78
  -5 -19   2    3.40    0.97
  -5 -19   2    2.99    0.88
  -5  19   1    7.96    1.19
   5 -19  -1    8.25    1.15
  -5 -19   1    8.36    1.34
   5  19   0    7.21    1.10
  -5  19   0   10.00    1.33
   5 -19   0    8.60    1.27
  -5  19   0    9.41    1.30
  -5  19  -1    3.57    0.86
   5 -19   1    4.35    1.04
   5 -19   1    4.53    0.95
   5 -19   1    2.83    0.90
  -5  19  -1    3.74    0.96
  -5  19  -2  133.91    4.51
   5 -19   2  137.72    4.86
   5 -19   2  131.54    4.72
   5 -19   2  142.40    5.04
   5 -19   2  144.93    4.87
  -5  19  -2  135.13    4.93
  -5  19  -3    7.60    1.12
  -5  19  -3    6.11    0.86
   5 -19   3    5.30    0.98
   5 -19   3    8.19    1.17
   5 -19   3    5.71    1.03
   5 -19   3    6.80    1.09
  -5  19  -4   10.84    1.24
   5 -19   4    8.58    1.02
   5 -19   4    7.12    1.03
   5 -19   4    8.43    1.11
   5 -19   4    8.96    1.12
   5 -19   5   34.75    1.62
   5 -19   5   38.70    1.89
   5 -19   5   40.06    1.98
  -5  19  -5   38.16    1.94
  -5  20   5   45.05    2.08
  -5 -20   5   44.18    2.40
  -5 -20   5   43.73    2.03
  -5 -20   5   44.56    2.34
  -5  20   4   50.53    2.42
  -5 -20   4   47.47    2.57
  -5 -20   4   42.77    2.61
  -5 -20   4   44.83    2.35
  -5 -20   4   44.41    2.58
  -5  20   3    4.33    0.85
  -5 -20   3    4.40    0.92
  -5 -20   3    6.35    1.11
  -5 -20   3    4.64    0.93
  -5 -20   3    3.58    0.87
  -5  20   2    0.68    0.62
  -5 -20   2    0.39    0.68
  -5 -20   2    0.08    0.69
  -5 -20   2    0.29    0.55
  -5  20   1   86.26    3.65
   5 -20  -1   87.65    3.45
  -5 -20   1   82.12    3.73
  -5  20   0   62.47    3.07
   5 -20   0   65.48    3.11
  -5 -20   0   61.75    3.19
   5  20   0   61.69    2.88
  -5  20  -1    0.17    0.53
   5 -20   1   -0.48    0.61
   5 -20   1    0.60    0.58
   5 -20   1    0.21    0.54
  -5  20  -1   -0.08    0.64
  -5  20  -2   78.92    3.16
   5 -20   2   82.44    3.46
   5 -20   2   81.64    3.35
   5 -20   2   82.89    3.51
  -5  20  -2   75.23    3.36
  -5  20  -3   89.76    3.05
   5 -20   3   95.63    3.54
   5 -20   3   91.78    3.48
   5 -20   3   98.07    3.68
   5 -20   3   93.42    3.47
  -5  20  -3   96.89    3.66
   5 -20   4    5.77    0.80
   5 -20   4    4.84    0.77
   5 -20   4    6.18    0.90
   5 -20   4    4.81    0.83
  -5  20  -4    3.17    0.68
  -5  21   5    8.04    0.79
  -5 -21   5    6.15    0.86
  -5 -21   5    7.36    0.91
  -5 -21   5    6.88    0.87
  -5  21   4   35.92    1.88
  -5 -21   4   32.40    1.95
  -5 -21   4   29.96    1.98
  -5 -21   4   38.35    1.97
  -5 -21   4   35.23    2.10
  -5  21   3    1.98    0.57
  -5 -21   3    2.28    0.64
  -5 -21   3    2.87    0.80
  -5 -21   3    2.57    0.74
  -5  21   2   52.78    2.61
  -5 -21   2   51.07    2.73
  -5 -21   2   48.49    2.75
  -5 -21   2   48.06    2.50
   5  21  -1   16.88    1.46
  -5  21   1   21.72    1.70
   5 -21  -1   21.97    1.57
  -5 -21   1   18.67    1.73
  -5 -21   1   20.16    1.66
   5  21   0    6.59    0.93
  -5  21   0    6.39    1.00
   5 -21   0    7.66    1.04
  -5 -21   0    6.27    0.95
  -5  21  -1   69.23    2.94
   5 -21   1   73.95    3.13
   5 -21   1   69.58    2.80
  -5 -21  -1   64.86    2.93
   5 -21   1   72.95    3.02
  -5  21  -1   69.98    2.94
  -5  21  -2    1.35    0.57
   5 -21   2    1.26    0.55
   5 -21   2    1.25    0.58
   5 -21   2    0.44    0.54
  -5  21  -2    0.27    0.50
  -5  21  -3    0.37    0.41
   5 -21   3    1.44    0.59
   5 -21   3    1.11    0.55
   5 -21   3    1.61    0.62
   5 -21   3    1.44    0.59
  -5  21  -3    0.54    0.48
   5 -21   4    1.19    0.41
  -5  21  -4    1.20    0.43
  -5  22   4   68.62    2.39
  -5 -22   4   68.23    2.43
  -5 -22   4   69.83    2.70
  -5  22   3    3.41    0.67
  -5 -22   3    2.78    0.67
  -5 -22   3    4.10    0.90
  -5 -22   3    1.92    0.58
  -5 -22   3    2.63    0.69
   5  22  -2   11.16    1.12
  -5  22   2   12.25    1.15
  -5 -22   2   12.25    1.24
  -5 -22   2   10.65    1.17
  -5 -22   2    9.30    1.13
   5  22  -1    0.04    0.41
  -5  22   1    0.01    0.47
  -5 -22   1   -0.44    0.52
   5 -22  -1   -0.02    0.47
  -5 -22   1    0.87    0.62
   5  22   0    0.92    0.49
  -5  22   0    0.87    0.52
   5 -22   0    0.69    0.47
  -5 -22   0    1.53    0.61
  -5  22  -1    3.00    0.66
   5 -22   1    4.87    0.83
   5 -22   1    4.10    0.78
   5 -22   2    4.49    0.74
   5 -22   2    2.21    0.60
  -5  22  -2    3.04    0.60
   5 -22   2    4.61    0.77
  -5  22  -2    2.96    0.60
   5 -22   3   35.48    1.72
   5 -22   3   39.07    1.81
  -5  23   3   13.49    1.02
  -5 -23   3   13.79    1.05
  -5 -23   3   12.58    1.02
  -5 -23   3   14.27    1.17
   5  23  -3   14.47    1.07
  -5  23   2   11.71    1.06
  -5 -23   2   10.72    1.05
  -5 -23   2   11.23    1.12
   5  23  -2   10.76    0.98
   5  23  -1    0.18    0.39
  -5 -23   1    0.10    0.41
  -5  23   1   -0.10    0.41
   5  23   0    4.42    0.61
  -5  23   0    3.86    0.69
  -5 -23   0    3.49    0.69
   5 -23   0    5.13    0.72
  -5  23  -1   84.51    2.76
   5 -23   1   87.20    2.87
   5 -23   2   23.28    1.35
  -5  24   2    8.32    0.74
  -5  24   1    5.93    0.66
  -5  24   0   95.42    2.74
  -6   0   9    0.57    0.57
  -6   0   8  267.27    8.27
  -6   0   7   -0.33    0.77
  -6   0   7    0.08    0.92
  -6   0   6   38.07    2.70
  -6   0   6   37.50    3.25
  -6   0   6   36.33    3.11
  -6   0   5   -0.01    0.58
  -6   0   5   -0.09    0.82
  -6   0   4   17.12    1.95
  -6   0   4   17.20    1.69
  -6   0   4   16.74    1.88
  -6   0   4   16.30    1.97
  -6   0   4   14.67    1.95
  -6   0   3    0.21    0.63
  -6   0   3   -1.21    0.77
  -6   0   3    0.41    0.71
   6   0  -3    0.62    0.77
  -6   0   2  183.19    6.15
  -6   0   2  178.43    6.35
  -6   0   2  173.14    6.37
   6   0  -2  172.52    6.25
  -6   0   1   -0.20    0.65
  -6   0   1    0.97    0.57
   6   0  -1   -0.38    0.77
   6   0  -1    1.04    0.91
  -6   0   1   -0.05    0.61
  -6   0   0    5.48    1.17
  -6   0   0    5.33    1.11
   6   0   0    6.45    1.24
   6   0   0    6.03    1.21
  -6   0   0    6.12    1.19
   6   0   1   -0.06    0.70
   6   0   1    0.26    0.70
  -6   0  -1    0.55    0.79
   6   0   2  305.80    8.63
   6   0   2  306.94    8.63
   6   0   2  301.94    8.89
   6   0   3    1.77    0.91
   6   0   3   -0.47    0.76
   6   0   3    1.15    0.78
   6   0   4  236.39    7.80
   6   0   4  232.98    7.15
   6   0   4  225.52    7.38
   6   0   5   -0.33    0.81
   6   0   5   -0.26    0.72
   6   0   6    4.19    0.96
   6   0   6    5.50    1.30
   6   0   7   -0.05    0.50
   6   0   7    1.13    0.75
   6   0   8   28.36    1.73
  -6   1   9    0.19    0.57
  -6  -1   9    0.57    0.60
  -6   1   8   14.67    1.87
  -6  -1   8   11.54    1.70
  -6  -1   7   21.15    1.99
  -6   1   7   24.75    2.14
  -6   1   7   23.11    2.56
  -6  -1   7   20.42    2.34
  -6  -1   6   45.63    2.92
  -6   1   6   47.44    2.95
  -6   1   6   39.94    3.34
  -6  -1   6   54.47    3.84
  -6  -1   6   47.26    3.62
  -6   1   6   43.94    3.45
  -6  -1   5   94.09    4.15
  -6   1   5  100.73    4.29
  -6   1   5   96.97    5.11
  -6  -1   5   98.94    5.23
  -6   1   5   93.37    5.05
  -6  -1   4    3.91    1.21
  -6  -1   4    1.85    0.77
  -6   1   4    2.90    0.80
  -6  -1   4    1.51    0.76
  -6   1   4    1.58    0.85
  -6  -1   4    2.25    0.91
  -6  -1   4    2.39    1.04
  -6   1   4    0.98    0.90
  -6  -1   3   -0.48    0.71
  -6   1   3    0.51    0.60
  -6  -1   3   -0.15    0.70
  -6  -1   3    0.41    0.72
  -6   1   3   -0.17    0.75
   6   1  -3    0.67    0.76
   6  -1  -3    0.81    0.78
  -6   1   2  112.31    4.65
  -6  -1   2  111.29    4.77
  -6  -1   2  111.21    4.90
  -6  -1   2  106.77    4.87
  -6   1   2  115.49    4.95
  -6   1   2  114.48    5.01
   6   1  -2  112.09    4.92
   6  -1  -2  114.90    4.92
  -6  -1   1   36.96    2.63
   6  -1  -1   37.10    2.60
  -6  -1   1   35.80    2.74
  -6  -1   1   32.90    2.57
  -6   1   1   37.11    2.69
   6   1  -1   32.10    2.57
  -6   1   1   36.15    2.76
   6  -1  -1   35.05    2.64
   6   1   0  268.17    7.85
   6  -1   0  269.20    7.84
  -6  -1   0  260.07    8.17
  -6  -1   0  285.78    8.02
   6   1   0  278.00    8.21
   6  -1   0  277.59    8.13
  -6   1   0  271.14    7.87
  -6   1   0  258.90    8.20
   6   1   1 1419.56   24.94
   6   1   1 1331.34   24.89
   6  -1   1 1397.53   25.06
   6   1   1 1416.28   25.55
   6  -1   1 1387.04   25.41
  -6   1  -1 1436.40   24.93
  -6  -1  -1 1349.33   25.75
   6   1   2    1.24    0.91
   6   1   2    2.57    0.91
   6  -1   2    1.12    0.90
   6   1   2    0.65    0.89
   6  -1   2    2.90    1.01
  -6   1  -2    1.37    0.80
   6   1   3  106.81    4.96
   6  -1   3  117.61    5.09
   6   1   3  109.01    4.74
   6  -1   3  109.84    4.80
   6   1   3  113.93    5.04
   6  -1   3  113.39    5.06
   6   1   4   27.81    2.58
   6   1   4   21.98    2.01
   6  -1   4   24.49    2.15
   6   1   4   27.23    2.39
   6  -1   4   24.95    2.30
   6   1   5  171.47    6.63
   6   1   5  185.16    6.20
   6  -1   5  185.80    6.32
   6   1   6    3.21    0.95
   6   1   6    2.39    0.97
   6  -1   6    3.45    1.11
   6   1   7  129.16    4.40
   6   1   7  141.48    5.04
   6  -1   7  146.48    5.04
   6   1   8   18.62    1.41
   6  -1   8   18.52    1.39
  -6   2   9  102.15    4.03
  -6  -2   9  102.96    4.10
  -6   2   8    3.68    0.93
  -6   2   8    3.85    1.08
  -6  -2   8    4.89    1.24
  -6   2   7  212.50    6.58
  -6   2   7  202.29    7.50
  -6  -2   7  199.93    7.60
  -6  -2   6    2.94    0.90
  -6   2   6    3.25    1.00
  -6   2   6    3.49    1.07
  -6  -2   6    1.82    1.14
  -6  -2   6    0.93    0.86
  -6   2   6    0.40    0.83
  -6  -2   5   54.63    3.11
  -6   2   5   61.30    3.32
  -6   2   5   63.45    4.06
  -6  -2   5   61.10    4.11
  -6   2   5   64.40    4.14
  -6  -2   4    7.79    1.40
  -6  -2   4    3.33    0.92
  -6   2   4    4.65    1.00
  -6  -2   4    5.48    1.21
  -6  -2   4    3.50    1.00
  -6   2   4    4.00    1.22
  -6  -2   4    6.51    1.34
  -6  -2   4    4.99    1.29
  -6   2   4    6.59    1.47
  -6  -2   3  482.64   11.68
  -6  -2   3  484.55   11.84
  -6  -2   3  467.79   12.22
  -6   2   3  470.43   12.05
  -6   2   3  487.46   11.67
   6   2  -3  504.39   12.21
  -6   2   2  162.33    5.73
  -6  -2   2  167.21    6.00
  -6  -2   2  165.96    6.16
  -6  -2   2  165.16    6.23
   6   2  -2  162.71    6.16
  -6   2   2  176.49    6.35
   6  -2  -2  164.69    5.98
  -6   2   2  164.13    6.09
   6   2  -2  183.09    6.57
  -6  -2   1  329.47    8.72
   6  -2  -1  301.58    8.33
  -6  -2   1  291.46    8.69
  -6  -2   1  308.45    8.66
   6   2  -1  288.57    8.61
  -6   2   1  313.67    8.75
   6  -2  -1  295.43    8.47
  -6   2   1  297.81    8.75
   6  -2   0  135.98    5.23
  -6  -2   0  141.21    5.69
  -6  -2   0  131.31    5.17
   6   2   0  137.10    5.52
   6  -2   0  130.44    5.29
  -6   2   0  146.63    5.45
   6   2   1  148.97    5.61
   6   2   1  147.40    5.57
   6  -2   1  142.60    5.45
   6   2   1  152.68    5.87
  -6  -2  -1  137.51    5.79
   6  -2   1  147.90    5.74
  -6   2  -1  150.04    5.54
  -6  -2  -2    0.47    0.69
   6   2   2    2.75    1.05
   6   2   2    0.45    0.75
   6  -2   2    0.07    0.68
   6   2   2    0.87    0.90
   6  -2   2    2.21    0.95
  -6   2  -2    3.88    1.07
   6   2   3   67.57    3.89
   6  -2   3   69.14    3.79
   6   2   3   62.23    3.53
   6  -2   3   66.18    3.65
   6   2   3   72.96    3.96
   6  -2   3   66.87    3.85
  -6  -2  -3   60.75    3.68
   6   2   4    2.65    1.08
   6  -2   4    0.01    0.59
   6   2   4    1.21    0.77
   6  -2   4    2.31    0.99
   6   2   5   96.28    4.35
   6   2   5   83.31    4.50
   6  -2   5   89.27    4.27
   6   2   6   43.08    2.77
   6   2   6   42.25    2.99
   6  -2   6   42.55    2.59
   6   2   7   24.53    1.83
   6   2   7   25.06    2.07
   6  -2   7   24.29    1.95
   6  -2   8   12.41    1.11
   6   2   8   10.79    1.11
  -6   3   9    9.94    1.23
  -6  -3   9   10.31    1.29
  -6   3   8   33.54    2.25
  -6   3   8   32.08    2.58
  -6   3   7  732.61   14.85
  -6   3   7  711.51   16.25
  -6  -3   7  708.06   16.53
  -6  -3   6   95.13    4.31
  -6   3   6  102.61    4.44
  -6   3   6   94.99    5.05
  -6  -3   6  104.48    5.42
  -6  -3   6  100.03    5.32
  -6   3   6  106.91    5.25
  -6  -3   5  181.15    5.95
  -6   3   5  181.49    6.01
  -6   3   5  185.06    7.14
  -6  -3   5  169.75    7.14
  -6   3   5  168.81    6.86
  -6   3   4  184.57    5.87
  -6  -3   4  191.13    6.41
  -6  -3   4  187.91    6.77
  -6  -3   4  185.23    6.65
  -6   3   4  184.96    7.03
  -6  -3   4  186.58    7.26
  -6  -3   4  181.00    6.55
  -6   3   4  180.19    6.91
   6   3  -4  198.60    6.97
  -6   3   3  191.54    5.68
  -6  -3   3  173.07    6.40
  -6  -3   3  180.58    6.08
  -6  -3   3  184.25    6.53
  -6  -3   3  178.01    6.48
  -6  -3   3  171.15    6.70
  -6   3   3  180.74    6.67
  -6   3   3  179.13    6.33
   6   3  -3  180.72    6.71
  -6  -3   2    7.61    1.37
  -6   3   2    8.09    1.42
  -6  -3   2    8.91    1.39
   6  -3  -2   12.04    1.56
   6  -3  -2   10.02    1.53
  -6  -3   2    9.45    1.55
  -6   3   2    8.28    1.40
   6   3  -2    7.22    1.47
  -6  -3   1  178.16    6.16
  -6  -3   1  159.23    6.07
   6  -3  -1  165.07    5.77
  -6  -3   1  170.21    6.10
   6   3  -1  155.93    6.06
   6  -3  -1  159.44    5.85
  -6   3   1  175.63    6.19
   6   3   0   99.27    4.44
   6  -3   0   95.59    4.32
  -6  -3   0   90.39    4.53
   6   3   0   96.99    4.63
   6  -3   0  101.10    4.56
  -6   3   0  105.95    4.60
   6   3   1  576.91   13.10
   6  -3   1  570.57   12.89
  -6  -3  -1  556.25   13.47
   6   3   1  547.51   13.20
   6  -3   1  573.53   13.20
  -6   3  -1  605.30   13.10
   6   3   2  146.20    5.79
   6  -3   2  143.20    5.58
   6   3   2  144.78    5.78
  -6  -3  -2  143.45    5.66
   6  -3   2  143.03    5.72
  -6   3  -2  146.65    5.51
   6   3   3  201.53    7.14
   6  -3   3  190.30    6.64
   6   3   3  204.56    7.00
   6  -3   3  202.01    7.04
  -6   3  -3  212.74    6.69
  -6  -3  -3  198.85    7.08
   6   3   4   65.61    3.98
   6  -3   4   59.02    3.39
   6   3   4   61.68    3.55
   6  -3   4   65.83    3.79
   6   3   5   -0.22    0.78
   6   3   5   -0.36    0.92
   6  -3   5    0.60    0.60
   6  -3   5    1.93    0.85
   6   3   6   32.77    2.42
   6   3   6   31.32    2.58
   6  -3   6   34.67    2.39
   6   3   7    7.83    1.21
   6  -3   7    6.13    1.02
   6   3   8    3.18    0.68
   6  -3   8    2.92    0.57
  -6   4   9   35.00    2.16
  -6  -4   9   34.48    2.22
  -6   4   8   63.31    3.07
  -6   4   8   54.48    3.31
  -6  -4   8   62.27    3.63
  -6   4   7   45.45    2.81
  -6   4   7   42.54    3.24
  -6  -4   7   47.43    3.48
  -6   4   6    2.66    1.10
  -6  -4   6    1.53    1.04
  -6   4   6    2.94    0.91
  -6   4   6    2.37    0.99
  -6  -4   5   89.95    4.07
  -6   4   5  103.35    4.37
  -6   4   5   95.70    4.98
  -6  -4   5  101.74    4.98
  -6  -4   5  101.80    5.40
  -6   4   5   99.37    5.06
  -6   4   4  131.52    4.80
  -6   4   4  133.41    5.72
  -6  -4   4  121.00    5.09
  -6  -4   4  119.05    5.36
  -6  -4   4  121.70    5.35
  -6   4   4  120.86    5.66
  -6  -4   4  125.99    5.88
  -6   4   4  123.84    5.61
   6   4  -4  125.36    5.52
  -6  -4   3   16.04    1.91
  -6   4   3   20.59    1.77
  -6  -4   3   19.98    2.13
  -6  -4   3   22.09    2.06
  -6  -4   3   16.61    1.92
  -6   4   3   19.95    2.21
  -6  -4   3   17.81    2.17
  -6   4   3   17.08    2.03
   6   4  -3   18.50    2.12
  -6  -4   2   33.97    2.65
  -6  -4   2   30.29    2.59
   6  -4  -2   33.21    2.48
  -6  -4   2   32.03    2.66
  -6   4   2   31.65    2.61
   6  -4  -2   32.59    2.49
   6   4  -2   33.54    2.82
  -6  -4   1   49.86    3.17
  -6  -4   1   39.44    2.93
   6  -4  -1   44.53    2.86
  -6  -4   1   43.35    2.97
   6   4  -1   40.69    3.01
   6  -4  -1   45.87    2.99
  -6   4   1   48.13    3.13
   6   4  -1   47.49    3.31
  -6  -4   0    0.79    0.75
   6  -4   0    1.69    0.71
   6   4   0    1.17    0.82
   6  -4   0    3.14    0.97
   6   4   0    2.01    0.84
   6  -4   0    2.30    0.91
  -6   4   0    2.44    0.97
   6  -4   1   62.80    3.35
   6   4   1   54.03    3.41
   6  -4   1   57.28    3.38
  -6  -4  -1   54.59    3.60
   6   4   1   56.23    3.56
   6  -4   1   62.06    3.62
  -6   4  -1   61.41    3.50
  -6  -4  -2    4.44    1.22
  -6  -4  -2    5.04    1.36
   6  -4   2    1.00    0.72
   6   4   2    1.64    0.86
   6  -4   2    2.38    0.86
   6  -4   2    4.58    1.05
   6   4   2    5.65    1.26
   6  -4   2    3.72    1.17
  -6   4  -2    4.09    1.07
   6   4   3  105.97    5.07
   6  -4   3  105.70    4.70
   6   4   3  100.72    4.75
   6  -4   3  103.70    4.87
  -6  -4  -3  103.84    5.00
  -6   4  -3  107.96    4.66
   6   4   4    0.54    0.77
   6   4   4    1.00    1.04
   6  -4   4    0.06    0.83
   6   4   4    0.04    0.64
   6  -4   4    1.38    0.94
   6   4   5   -0.86    0.90
   6   4   5   -0.91    0.89
   6  -4   5    0.73    0.70
   6  -4   5   -0.57    0.65
   6   4   6    0.20    0.54
   6   4   6    1.06    0.94
   6  -4   6   -0.14    0.57
   6   4   7   20.12    1.84
   6  -4   7   20.25    1.68
   6   4   8    1.13    0.49
  -6  -5   9    2.38    0.70
  -6   5   8   79.72    3.41
  -6  -5   8   80.26    4.04
  -6   5   8   76.88    3.83
  -6   5   7   22.88    2.02
  -6   5   7   21.89    2.28
  -6  -5   7   25.22    2.55
  -6   5   6  124.95    4.90
  -6   5   6  118.51    5.55
  -6  -5   6  119.40    5.82
  -6   5   6  116.74    5.35
  -6   5   5  255.93    7.43
  -6   5   5  259.21    8.49
  -6  -5   5  257.15    7.83
  -6  -5   5  252.31    8.39
  -6  -5   5  241.79    8.75
  -6   5   5  246.61    8.30
  -6   5   4   78.62    3.71
  -6   5   4   93.39    4.65
  -6  -5   4   85.92    3.94
  -6  -5   4   86.91    4.30
  -6  -5   4   77.45    4.33
  -6  -5   4   77.77    4.28
  -6   5   4   81.93    4.66
  -6  -5   4   75.93    4.56
  -6   5   4   81.22    4.41
  -6   5   3  608.94   12.34
  -6  -5   3  589.68   13.65
  -6  -5   3  590.01   13.18
  -6  -5   3  578.86   13.73
  -6  -5   3  588.34   13.75
  -6   5   3  581.06   14.07
  -6  -5   3  553.21   13.95
  -6   5   3  593.03   13.83
   6   5  -3  576.78   14.09
  -6  -5   2   12.41    1.73
  -6  -5   2   14.23    1.81
   6  -5  -2   13.27    1.59
   6  -5  -2   14.31    1.70
  -6  -5   2   15.07    1.91
   6   5  -2   16.54    2.03
   6  -5  -1  229.05    6.44
  -6  -5   1  232.00    7.34
  -6  -5   1  216.08    7.39
   6  -5  -1  223.02    6.87
  -6  -5   1  210.25    7.04
   6  -5  -1  219.61    7.00
  -6   5   1  229.99    7.31
   6   5  -1  214.66    7.60
   6  -5   0   72.50    3.48
   6   5   0   71.45    3.86
  -6  -5   0   64.26    3.84
   6  -5   0   69.24    3.67
   6   5   0   68.32    3.94
   6  -5   0   70.42    3.79
  -6   5   0   72.98    3.89
   6   5   0   72.89    4.15
   6  -5   1  377.61    9.59
   6   5   1  383.40   10.28
   6  -5   1  389.35   10.00
  -6  -5  -1  397.81   10.73
   6   5   1  373.92   10.30
   6  -5   1  395.21   10.31
  -6   5  -1  401.84   10.25
   6  -5   2   67.94    3.63
   6   5   2   62.29    3.86
   6  -5   2   74.49    3.93
   6  -5   2   70.66    4.10
   6   5   2   67.64    3.90
  -6  -5  -2   66.46    3.93
   6  -5   2   71.51    3.97
  -6  -5  -2   70.88    4.14
  -6   5  -2   72.70    3.87
  -6  -5  -3    3.24    1.11
   6   5   3    5.10    1.34
   6  -5   3    6.12    1.26
   6   5   3    5.17    1.21
   6  -5   3    5.54    1.31
   6   5   3    4.43    1.23
  -6   5  -3    4.37    1.13
   6   5   4   90.80    4.77
   6  -5   4   93.85    4.40
   6  -5   4   88.25    4.48
  -6   5  -4  102.11    4.44
   6   5   5    5.30    1.25
   6   5   5    6.56    1.37
   6  -5   5    6.22    1.11
   6  -5   5    7.20    1.31
   6   5   6    0.93    0.82
   6  -5   6    0.46    0.57
   6   5   7   41.69    2.52
   6  -5   7   37.79    2.22
   6   5   8   44.30    2.03
  -6  -6   9    1.02    0.54
  -6   6   8    0.29    0.62
  -6   6   8   -0.59    0.63
  -6  -6   8    0.10    0.62
  -6   6   7  369.95    9.08
  -6   6   7  357.04    9.86
  -6  -6   7  360.79   10.34
  -6   6   6  128.12    4.95
  -6   6   6  119.70    5.47
  -6  -6   6  129.13    6.00
  -6  -6   6  131.20    5.23
  -6   6   6  130.32    5.54
  -6   6   5  348.05    8.97
  -6   6   5  342.80    9.87
  -6  -6   5  332.60    8.98
  -6  -6   5  340.45    9.44
  -6  -6   5  329.98    9.96
  -6  -6   5  317.73   10.32
  -6   6   5  341.51    9.90
  -6   6   4   26.41    2.11
  -6  -6   4   27.06    2.20
  -6  -6   4   25.94    2.34
  -6  -6   4   26.12    2.51
  -6  -6   4   24.17    2.46
  -6  -6   4   23.99    2.58
  -6   6   4   25.13    2.47
  -6   6   3   96.30    4.01
  -6  -6   3   97.81    4.17
  -6  -6   3  100.61    4.77
  -6  -6   3  100.95    4.63
  -6  -6   3   93.85    4.74
  -6  -6   3  107.18    5.03
  -6   6   3  100.90    5.06
  -6  -6   3   94.35    4.91
  -6   6   3  101.58    4.86
   6   6  -3  101.35    5.10
  -6  -6   2  129.86    5.36
  -6  -6   2  127.55    5.53
  -6  -6   2  113.78    5.25
   6  -6  -2  123.32    4.83
  -6   6   2  122.06    5.44
  -6   6   2  118.88    5.21
   6   6  -2  122.37    5.62
  -6  -6   1    0.89    0.83
   6  -6  -1    3.27    0.93
  -6  -6   1    1.47    0.85
   6  -6  -1    4.65    1.08
   6  -6  -1    0.14    0.71
   6   6  -1    2.17    1.01
  -6   6   1    0.58    0.74
   6  -6   0  184.21    5.93
   6   6   0  188.15    6.66
  -6  -6   0  187.94    6.86
   6  -6   0  187.70    6.34
   6  -6   0  189.54    6.51
  -6   6   0  190.03    6.56
   6   6   0  184.17    6.99
   6  -6   1  815.82   16.29
   6   6   1  819.02   17.26
   6  -6   1  813.06   16.75
  -6  -6  -1  816.28   17.47
   6   6   1  761.33   16.98
   6  -6   1  834.76   17.12
  -6   6  -1  846.45   17.12
   6   6   1  836.46   17.78
   6  -6   2   43.38    2.86
   6   6   2   42.53    3.18
   6  -6   2   46.30    3.07
   6  -6   2   36.81    3.04
   6   6   2   39.13    2.97
  -6  -6  -2   43.29    3.23
   6  -6   2   40.14    3.01
  -6   6  -2   37.42    2.82
   6   6   2   42.50    3.17
   6  -6   3   24.73    2.24
   6   6   3   28.12    2.66
   6  -6   3   26.41    2.33
   6   6   3   27.77    2.44
   6  -6   3   31.83    2.69
  -6   6  -3   26.08    2.36
   6   6   3   25.76    2.39
   6   6   4   17.67    2.15
   6  -6   4   16.82    1.86
  -6   6  -4   18.35    1.95
   6  -6   4   16.56    1.96
   6   6   5  143.64    5.89
   6  -6   5  141.46    5.18
   6  -6   5  139.00    5.49
   6   6   6   14.18    1.79
   6  -6   6   13.27    1.53
  -6   6  -7   12.04    1.17
   6   6   7   13.07    1.46
   6  -6   7   13.31    1.30
  -6  -7   9   45.41    2.17
  -6   7   8    9.43    1.18
  -6   7   8   10.54    1.30
  -6  -7   8    8.53    1.27
  -6   7   7   36.45    2.44
  -6   7   7   32.41    2.54
  -6  -7   7   36.89    2.93
  -6  -7   7   35.41    2.44
  -6   7   6  216.81    6.62
  -6   7   6  198.65    7.05
  -6  -7   6  206.64    7.67
  -6  -7   6  203.94    6.88
  -6   7   6  214.19    7.12
  -6   7   5   54.62    3.16
  -6  -7   5   51.84    3.19
  -6  -7   5   57.77    3.59
  -6  -7   5   55.01    3.73
  -6   7   5   49.56    3.40
  -6   7   4   34.81    2.45
  -6  -7   4   33.76    2.50
  -6  -7   4   38.38    2.89
  -6  -7   4   36.78    3.02
  -6  -7   4   33.64    3.04
  -6   7   4   34.52    2.85
  -6   7   3   54.05    2.96
  -6  -7   3   57.43    3.22
  -6  -7   3   54.14    3.49
  -6  -7   3   57.43    3.51
  -6  -7   3   54.63    3.63
  -6  -7   3   51.62    3.54
  -6   7   3   53.96    3.75
  -6  -7   3   51.43    3.58
  -6   7   3   55.37    3.54
   6   7  -3   62.30    4.01
  -6   7   2  123.11    4.46
  -6  -7   2  127.57    5.35
  -6  -7   2  116.19    5.35
  -6  -7   2  113.24    5.23
  -6   7   2  112.71    5.35
   6  -7  -2  129.49    4.88
  -6   7   2  124.31    5.31
   6   7  -2  122.93    5.72
   6  -7  -1   95.77    3.98
  -6  -7   1  101.36    4.76
  -6  -7   1   94.71    4.75
   6  -7  -1   99.67    4.39
   6  -7  -1   99.71    4.43
  -6   7   1   97.02    4.61
   6   7  -1   92.23    4.90
  -6  -7   0   17.29    2.07
   6  -7   0   16.43    1.75
   6   7   0   16.06    1.89
   6  -7   0   18.54    1.90
   6  -7   0   22.17    2.17
   6   7   0   15.93    2.08
  -6   7   0   15.63    1.89
  -6  -7  -1    7.30    1.51
  -6   7  -1    5.81    1.14
   6  -7   1    9.34    1.40
   6   7   1    7.87    1.50
   6  -7   1    6.25    1.27
   6  -7   1    8.13    1.45
   6   7   1   10.35    1.70
  -6   7  -1    5.68    1.30
  -6  -7  -2    8.19    1.53
  -6   7  -2    8.66    1.39
   6  -7   2    7.40    1.26
   6   7   2    8.83    1.59
   6  -7   2    7.67    1.37
   6  -7   2    6.16    1.39
   6   7   2    8.71    1.48
   6  -7   2    8.42    1.53
   6   7   2    9.31    1.62
  -6   7  -2    7.34    1.43
  -6   7  -3    1.77    0.87
   6  -7   3    1.55    0.87
   6   7   3    2.13    0.99
   6  -7   3    1.56    0.79
   6  -7   3    2.07    1.01
   6   7   3    1.36    0.72
  -6   7  -4    0.13    0.71
   6   7   4    1.16    0.91
   6  -7   4    0.41    0.68
   6  -7   4    0.46    0.78
   6   7   5   39.23    3.03
   6  -7   5   40.39    2.66
   6  -7   5   45.30    3.02
  -6   7  -5   40.64    2.63
  -6   7  -6   13.16    1.40
   6   7   6   12.65    1.67
   6  -7   6   12.25    1.46
  -6   7  -7    0.84    0.50
   6   7   7    1.21    0.74
   6  -7   7    0.20    0.53
  -6   8   8   12.47    1.28
  -6  -8   8   12.35    1.42
  -6   8   7    1.18    0.71
  -6   8   7    1.50    0.75
  -6  -8   7    0.57    0.80
  -6  -8   7   -0.27    0.62
  -6   8   6    3.86    0.96
  -6  -8   6    2.60    1.05
  -6  -8   6    4.02    1.14
  -6   8   5   17.35    1.78
  -6  -8   5   15.74    1.77
  -6  -8   5   17.81    2.09
  -6  -8   5   20.38    2.23
  -6  -8   5   19.11    2.28
  -6   8   5   13.65    1.87
  -6   8   4  220.05    6.66
  -6  -8   4  215.78    6.87
  -6  -8   4  217.99    7.40
  -6  -8   4  214.49    7.72
  -6  -8   4  204.31    7.79
  -6   8   4  210.87    7.32
  -6   8   3  175.69    5.70
  -6  -8   3  173.29    5.94
  -6  -8   3  167.79    6.39
  -6  -8   3  168.82    6.31
  -6  -8   3  162.86    6.58
  -6  -8   3  171.13    6.71
  -6   8   3  173.42    7.03
  -6  -8   3  172.88    6.78
  -6   8   3  175.67    6.47
  -6   8   2  519.54   11.08
  -6  -8   2  515.03   12.39
  -6  -8   2  490.37   12.58
  -6  -8   2  461.25   12.06
  -6   8   2  530.51   13.05
  -6   8   2  504.34   12.27
   6   8  -2  491.67   12.99
   6  -8  -1  120.83    4.52
  -6  -8   1  123.21    5.33
  -6  -8   1  115.06    5.35
  -6   8   1  114.57    5.26
   6  -8  -1  123.42    4.89
   6  -8  -1  117.19    4.85
  -6   8   1  113.91    5.06
   6   8  -1  108.42    5.48
  -6  -8   0    0.22    0.88
  -6   8   0    0.61    0.73
   6  -8   0    1.44    0.70
   6   8   0    1.70    1.01
   6  -8   0    0.22    0.66
   6  -8   0    0.42    0.84
   6   8   0   -0.23    0.86
  -6   8   0    1.39    0.82
  -6   8  -1   59.04    3.26
   6  -8   1   57.05    3.26
   6   8   1   59.00    3.74
  -6  -8  -1   59.58    3.78
   6  -8   1   55.14    3.37
   6  -8   1   63.23    3.70
  -6   8  -1   55.65    3.50
   6   8   1   62.85    3.94
   6  -8   2   49.32    3.12
   6   8   2   53.46    3.61
   6  -8   2   49.62    3.22
   6  -8   2   47.35    3.55
   6  -8   2   46.08    3.26
  -6   8  -2   59.23    3.57
   6   8   2   50.86    3.50
  -6   8  -3   10.57    1.59
  -6   8  -3    8.18    1.26
   6  -8   3    8.11    1.41
   6   8   3    8.44    1.63
   6  -8   3    5.84    1.28
   6  -8   3    5.04    1.27
  -6   8  -4   51.91    3.01
   6  -8   4   53.70    3.20
   6   8   4   54.98    3.69
   6  -8   4   54.08    3.32
   6  -8   4   59.13    3.63
  -6   8  -4   59.33    3.49
  -6   8  -5   12.10    1.41
   6   8   5   12.64    1.75
   6  -8   5   14.00    1.60
   6  -8   5   11.75    1.61
  -6   8  -5   14.33    1.59
  -6   8  -6   48.09    2.57
   6   8   6   45.13    2.91
   6  -8   6   45.36    2.38
   6  -8   6   47.87    2.74
  -6   8  -7    0.80    0.47
   6   8   7   -0.06    0.59
   6  -8   7    1.51    0.54
  -6   9   8   37.45    2.07
  -6  -9   8   37.77    2.34
  -6  -9   8   35.71    2.01
  -6   9   7    3.93    0.90
  -6  -9   7    4.33    1.07
  -6  -9   7    3.69    0.81
  -6   9   6    0.33    0.67
  -6  -9   6    0.22    0.77
  -6  -9   6    0.17    0.66
  -6   9   5  260.94    7.43
  -6  -9   5  243.19    7.56
  -6  -9   5  254.30    8.19
  -6  -9   5  244.66    8.04
  -6  -9   5  251.90    8.46
  -6   9   5  249.92    7.83
  -6   9   4    0.39    0.61
  -6  -9   4    1.40    0.79
  -6  -9   4    1.00    0.86
  -6  -9   4   -0.34    0.89
  -6   9   4   -0.04    0.88
  -6   9   3  471.07   10.75
  -6  -9   3  454.59   11.05
  -6  -9   3  463.58   11.81
  -6  -9   3  478.97   11.93
  -6  -9   3  480.99   12.42
  -6  -9   3  436.41   11.96
  -6   9   3  483.78   11.90
  -6  -9   2    1.07    0.95
  -6   9   2    0.18    0.59
  -6  -9   2    0.19    0.77
  -6  -9   2    0.58    0.95
  -6   9   2   -0.66    0.85
  -6  -9   2    0.01    0.83
   6   9  -2    2.07    1.18
  -6   9   2   -0.21    0.66
  -6   9   1   52.83    2.84
   6  -9  -1   53.76    2.95
  -6  -9   1   52.83    3.41
  -6  -9   1   47.06    3.40
  -6   9   1   45.59    3.28
   6  -9  -1   48.04    3.00
   6  -9  -1   55.30    3.22
  -6   9   1   53.96    3.41
   6   9  -1   42.47    3.37
  -6   9   0  171.35    5.88
   6  -9   0  177.26    5.90
  -6  -9   0  174.58    6.74
  -6   9   0  170.27    6.44
   6  -9   0  173.78    6.14
   6  -9   0  178.87    6.28
  -6   9   0  180.86    6.51
   6   9   0  166.72    6.84
  -6   9  -1  233.09    7.19
   6  -9   1  246.54    7.34
   6  -9   1  242.40    7.28
   6   9   1  241.30    8.06
  -6  -9  -1  217.32    7.69
   6  -9   1  228.48    8.30
   6  -9   1  245.82    7.63
   6  -9   1  252.24    7.85
  -6   9  -1  254.81    7.94
   6   9   1  234.04    8.17
   6  -9   2  386.40    9.99
   6  -9   2  378.28    9.98
   6   9   2  398.07   11.02
   6  -9   2  411.27   10.52
   6  -9   2  401.63   10.70
  -6   9  -2  412.97   10.71
   6   9   2  382.26   10.76
  -6   9  -3  114.96    4.61
   6  -9   3  111.92    4.81
   6   9   3  113.51    5.37
   6  -9   3  114.04    5.02
   6  -9   3  108.68    5.13
  -6   9  -3  119.31    5.18
  -6   9  -4   26.24    2.18
   6  -9   4   27.08    2.28
   6   9   4   23.12    2.41
   6  -9   4   25.45    2.30
   6  -9   4   27.38    2.48
  -6   9  -4   26.72    2.37
  -6   9  -5   -0.08    0.68
   6   9   5   -0.24    0.85
   6  -9   5    0.54    0.63
   6  -9   5    0.70    0.68
  -6   9  -5    0.30    0.59
  -6   9  -6    0.95    0.54
   6   9   6    1.16    0.67
   6  -9   6    1.51    0.55
   6  -9   6    1.29    0.68
  -6   9  -7   25.72    1.54
   6   9   7   21.91    1.62
   6  -9   7   21.28    1.40
  -6  10   8   16.85    1.31
  -6 -10   8   15.75    1.40
  -6 -10   8   14.83    1.29
  -6  10   7    1.46    0.67
  -6 -10   7    1.38    0.71
  -6 -10   7    0.44    0.59
  -6  10   6    6.50    1.17
  -6 -10   6    6.48    1.31
  -6 -10   6    7.54    1.42
  -6  10   5    7.75    1.30
  -6 -10   5    6.99    1.29
  -6 -10   5    7.18    1.39
  -6 -10   5    8.32    1.29
  -6  10   4   12.60    1.55
  -6 -10   4   14.20    1.76
  -6 -10   4   15.02    1.97
  -6 -10   4   10.59    1.70
  -6  10   4   10.44    1.59
  -6  10   3  183.17    5.95
  -6 -10   3  183.88    6.29
  -6 -10   3  175.55    6.65
  -6 -10   3  180.84    6.99
  -6  10   3  180.28    6.56
  -6 -10   2   10.38    1.79
  -6  10   2   12.37    1.49
  -6 -10   2   10.81    1.66
  -6 -10   2    9.16    1.66
  -6  10   2   11.39    1.67
  -6  10   1  196.16    5.94
   6 -10  -1  184.08    5.88
  -6 -10   1  207.34    7.07
  -6 -10   1  183.34    7.06
  -6  10   1  183.58    6.97
   6 -10  -1  192.72    6.33
  -6  10   1  188.70    6.75
   6  10  -1  168.48    7.04
  -6  10   0  116.25    4.87
   6 -10   0  121.33    4.77
  -6 -10   0  113.32    5.35
   6 -10   0  114.34    4.89
   6 -10   0  119.17    5.01
  -6  10   0  128.94    5.39
   6  10   0  118.52    5.71
   6 -10   1  130.52    5.19
   6 -10   1  138.88    5.29
   6  10   1  145.63    6.10
  -6 -10  -1  141.15    5.97
   6 -10   1  144.43    5.66
   6 -10   1  146.64    5.79
  -6  10  -1  153.31    5.97
   6  10   1  127.90    5.89
  -6  10  -2  735.52   15.13
   6 -10   2  757.81   15.76
   6 -10   2  748.50   15.80
   6  10   2  761.34   16.94
   6 -10   2  774.07   16.29
   6 -10   2  774.53   16.59
  -6  10  -2  785.11   16.53
   6  10   2  728.44   16.51
  -6  10  -3   95.93    4.21
   6 -10   3   94.08    4.40
   6 -10   3  100.01    4.60
   6  10   3  101.27    5.02
   6 -10   3  108.87    4.83
   6 -10   3  101.74    4.87
  -6  10  -3  101.85    4.77
  -6  10  -4    5.69    1.22
  -6  10  -4    4.08    1.05
   6 -10   4    3.46    0.95
   6  10   4    4.23    1.12
   6 -10   4    2.82    1.03
   6 -10   4    2.16    0.94
  -6  10  -5    0.36    0.53
   6  10   5    0.63    0.80
   6 -10   5   -0.07    0.69
   6 -10   5   -0.47    0.66
  -6  10  -5   -0.07    0.64
  -6  10  -6    0.75    0.57
   6  10   6    0.64    0.57
   6 -10   6    1.19    0.58
   6 -10   6    2.19    0.72
  -6  10  -6    1.17    0.47
  -6  10  -7   14.02    1.12
   6  10   7   11.70    1.14
   6 -10   7   14.20    1.09
  -6  11   8    4.60    0.73
  -6 -11   8    4.95    0.78
  -6  11   7    8.61    1.11
  -6 -11   7    9.66    1.32
  -6 -11   7    9.62    1.32
  -6  11   6  158.63    5.26
  -6 -11   6  153.66    5.87
  -6 -11   6  155.84    5.85
  -6 -11   6  150.64    5.03
  -6  11   5   25.81    2.09
  -6 -11   5   22.69    2.16
  -6 -11   5   21.07    2.24
  -6 -11   5   22.62    2.02
  -6  11   4   -0.30    0.69
  -6 -11   4    0.32    0.78
  -6 -11   4    1.69    1.04
  -6 -11   4    1.39    1.04
  -6  11   4   -0.20    0.79
  -6  11   3   67.50    3.46
  -6 -11   3   70.00    3.75
  -6 -11   3   67.70    3.95
  -6 -11   3   71.17    4.25
  -6  11   3   67.60    3.81
  -6  11   2  152.76    5.31
  -6 -11   2  152.10    5.99
  -6 -11   2  153.72    6.37
  -6  11   2  148.67    5.88
  -6  11   1  411.77    9.81
   6 -11  -1  427.47    9.98
  -6 -11   1  440.07   11.22
   6 -11  -1  427.69   10.45
  -6  11   1  421.69   10.96
   6 -11   0   76.68    3.73
   6 -11   0   71.40    3.51
  -6 -11   0   81.01    4.31
   6 -11   0   69.06    3.73
   6 -11   0   76.74    3.93
  -6  11   0   67.01    3.88
   6  11   0   68.18    4.34
   6 -11   1   20.70    1.99
   6 -11   1   19.28    1.94
   6 -11   1   16.25    1.93
   6 -11   1   20.12    2.13
   6  11   1   15.99    2.04
  -6  11  -1   16.77    1.94
  -6  11  -2  146.59    5.29
   6 -11   2  143.15    5.52
   6 -11   2  136.37    5.41
   6  11   2  149.48    6.24
   6 -11   2  135.25    5.58
   6 -11   2  144.51    5.87
  -6  11  -2  142.57    5.82
  -6  11  -3    5.04    1.25
  -6  11  -3    3.44    0.99
   6 -11   3    3.42    1.04
   6 -11   3    3.37    1.03
   6  11   3    2.14    1.02
   6 -11   3    3.47    1.13
   6 -11   3    3.96    1.16
  -6  11  -4  311.61    8.31
   6 -11   4  315.16    8.50
   6  11   4  315.60    9.35
   6 -11   4  323.93    8.78
   6 -11   4  331.01    9.23
  -6  11  -4  335.08    9.01
  -6  11  -5    9.45    1.23
   6  11   5   10.30    1.50
   6 -11   5   10.27    1.31
   6 -11   5   10.37    1.42
  -6  11  -5    9.44    1.31
  -6  11  -6    0.71    0.43
   6  11   6    0.56    0.57
   6 -11   6    0.94    0.47
   6 -11   6    1.98    0.71
  -6  11  -6    0.79    0.50
  -6  12   8   -0.01    0.40
  -6  12   7    0.08    0.50
  -6 -12   7    0.05    0.60
  -6  12   6   49.71    2.72
  -6 -12   6   43.38    2.82
  -6 -12   6   40.73    2.86
  -6 -12   6   45.25    2.56
  -6  12   5    9.78    1.35
  -6 -12   5    7.28    1.40
  -6 -12   5    8.25    1.39
  -6 -12   5   12.49    1.79
  -6 -12   5    9.24    1.31
  -6  12   4  194.95    6.11
  -6 -12   4  174.46    6.24
  -6 -12   4  180.20    6.73
  -6 -12   4  188.08    7.09
  -6  12   4  179.90    6.26
  -6  12   3   37.97    2.61
  -6 -12   3   40.16    2.87
  -6 -12   3   38.98    3.00
  -6 -12   3   37.84    3.12
  -6  12   3   38.51    2.87
  -6  12   2  948.59   17.90
  -6 -12   2  936.49   18.99
  -6 -12   2  929.82   19.65
  -6  12   2  942.37   18.92
  -6  12   1  204.68    6.28
   6 -12  -1  213.23    6.41
  -6 -12   1  212.88    7.23
   6 -12  -1  213.72    6.71
  -6  12   1  202.98    7.04
  -6  12   0  135.14    4.82
   6 -12   0  145.35    5.30
   6 -12   0  137.14    5.02
  -6 -12   0  147.25    5.97
   6 -12   0  137.37    5.41
   6 -12   0  145.78    5.54
  -6  12   0  137.92    5.68
  -6  12  -1   75.02    3.65
   6 -12   1   74.43    3.80
   6 -12   1   76.31    3.80
   6 -12   1   78.78    4.07
   6 -12   1   78.15    4.12
  -6  12  -1   77.11    4.16
  -6  12  -2    3.10    1.13
  -6  12  -2    3.86    1.04
   6 -12   2    4.65    1.23
   6 -12   2    1.85    0.85
   6  12   2    2.14    1.08
   6 -12   2    2.48    1.05
   6 -12   2    2.90    1.11
  -6  12  -3  181.81    6.03
   6 -12   3  174.32    6.08
   6 -12   3  178.06    6.23
   6  12   3  180.09    6.78
   6 -12   3  189.07    6.50
   6 -12   3  186.42    6.65
  -6  12  -3  187.91    6.61
  -6  12  -4  114.64    4.53
   6 -12   4  114.74    4.60
   6  12   4  120.30    5.22
   6 -12   4  118.83    4.81
   6 -12   4  118.86    5.03
  -6  12  -4  121.97    4.96
  -6  12  -5    8.05    1.11
   6  12   5    9.67    1.40
   6 -12   5    8.17    1.17
   6 -12   5    7.82    1.26
  -6  12  -5    9.07    1.25
  -6  12  -6    0.60    0.48
   6  12   6    0.27    0.53
   6 -12   6   -0.38    0.51
   6 -12   6    1.18    0.55
  -6  12  -6    0.53    0.53
  -6  13   8  162.70    3.88
  -6  13   7   -0.02    0.43
  -6 -13   7    0.63    0.55
  -6  13   6   68.08    3.10
  -6 -13   6   65.61    3.54
  -6 -13   6   66.76    3.08
  -6  13   5    9.63    1.32
  -6 -13   5    9.24    1.48
  -6 -13   5    8.94    1.34
  -6 -13   5    6.31    1.29
  -6 -13   5    8.41    1.29
  -6  13   4  183.25    5.90
  -6 -13   4  184.08    6.37
  -6 -13   4  181.53    6.88
  -6 -13   4  182.29    6.68
  -6 -13   4  172.55    6.72
  -6  13   3  175.95    5.83
  -6 -13   3  176.82    6.29
  -6 -13   3  172.23    6.61
  -6 -13   3  173.46    6.77
  -6  13   3  179.58    6.24
  -6  13   2  170.63    5.74
  -6 -13   2  172.19    6.26
  -6 -13   2  169.50    6.54
  -6 -13   2  171.08    6.72
  -6  13   2  170.35    6.23
  -6  13   1   98.95    4.16
   6 -13  -1  103.35    4.22
  -6 -13   1  103.35    4.80
   6 -13  -1   99.68    4.33
  -6  13   1  101.84    4.76
  -6  13   0   32.11    2.28
   6 -13   0   31.93    2.42
  -6 -13   0   37.35    2.87
   6 -13   0   35.15    2.65
   6 -13   0   38.58    2.69
  -6  13   0   35.53    2.79
   6 -13   1   30.89    2.47
   6 -13   1   32.63    2.48
   6 -13   1   34.19    2.68
   6 -13   1   37.55    2.79
  -6  13  -1   30.45    2.60
  -6  13  -2  188.32    6.17
   6 -13   2  183.91    6.26
   6 -13   2  184.49    6.29
   6 -13   2  187.56    6.55
   6 -13   2  187.01    6.63
  -6  13  -2  185.78    6.66
  -6  13  -3   15.95    1.87
  -6  13  -3   14.54    1.65
   6 -13   3   14.82    1.76
   6 -13   3   15.46    1.80
   6  13   3   16.16    1.93
   6 -13   3   17.59    1.89
   6 -13   3   18.46    2.02
  -6  13  -4  326.23    8.35
   6 -13   4  339.27    8.52
   6  13   4  326.38    9.07
   6 -13   4  341.92    8.78
   6 -13   4  346.59    9.11
  -6  13  -4  340.97    8.91
  -6  13  -5    4.45    0.88
   6  13   5    4.47    0.96
   6 -13   5    5.05    0.93
   6 -13   5    3.68    0.88
  -6  13  -5    4.19    0.91
  -6  13  -6   10.31    1.04
   6 -13   6    8.54    0.91
   6 -13   6    9.11    1.08
  -6  13  -6   11.01    1.09
  -6  14   7    6.96    0.86
  -6 -14   7    7.54    1.07
  -6  14   6   11.86    1.27
  -6 -14   6    8.91    1.32
  -6 -14   6   10.65    1.19
  -6  14   5    0.20    0.61
  -6 -14   5   -0.06    0.68
  -6 -14   5    0.34    0.88
  -6 -14   5   -0.14    0.57
  -6  14   4   25.27    2.01
  -6 -14   4   25.76    2.27
  -6 -14   4   26.26    2.51
  -6 -14   4   22.68    2.24
  -6 -14   4   22.99    2.31
  -6  14   3    7.43    1.21
  -6 -14   3    9.00    1.45
  -6 -14   3    7.40    1.54
  -6 -14   3    7.85    1.50
  -6  14   3    6.74    1.18
  -6  14   2    7.83    1.26
  -6 -14   2    8.53    1.46
  -6 -14   2    6.44    1.38
  -6 -14   2    6.65    1.44
  -6  14   2    7.36    1.36
  -6  14   1  342.42    8.74
   6 -14  -1  354.87    8.76
  -6 -14   1  350.17    9.48
  -6 -14   1  343.68    9.99
   6 -14  -1  370.04    9.11
  -6  14   1  342.15    9.46
  -6  14   0   14.97    1.60
   6 -14   0   16.78    1.78
  -6 -14   0   17.11    2.00
   6 -14   0   15.30    1.78
  -6  14   0   15.07    1.84
   6 -14   1    0.34    0.67
   6 -14   1   -0.86    0.72
  -6 -14  -1    0.33    0.74
   6 -14   1   -0.28    0.80
   6 -14   1   -0.59    0.85
  -6  14  -1    0.22    0.71
  -6  14  -2   36.38    2.55
   6 -14   2   44.43    2.86
   6 -14   2   38.52    2.69
   6 -14   2   44.93    2.98
   6 -14   2   37.92    2.81
  -6  14  -2   44.51    3.05
  -6  14  -3    3.28    1.03
  -6  14  -3    3.17    0.94
   6 -14   3    4.25    1.02
   6 -14   3    3.44    0.94
   6 -14   3    3.70    1.01
   6 -14   3    4.22    1.18
  -6  14  -4   23.79    1.92
   6 -14   4   24.38    1.97
   6 -14   4   25.12    2.08
   6 -14   4   23.96    2.12
  -6  14  -4   24.03    2.09
  -6  14  -5    2.92    0.74
   6 -14   5    2.95    0.73
   6 -14   5    2.69    0.82
  -6  14  -5    1.86    0.68
  -6  14  -6   62.59    2.36
   6 -14   6   66.91    2.63
  -6  14  -6   64.61    2.37
  -6  15   7    2.24    0.53
  -6 -15   7    2.12    0.63
  -6  15   6    1.11    0.54
  -6 -15   6    1.47    0.67
  -6 -15   6    2.59    0.72
  -6 -15   6    0.78    0.48
  -6  15   5  236.30    6.35
  -6 -15   5  231.69    6.80
  -6 -15   5  238.37    7.36
  -6 -15   5  232.50    6.62
  -6  15   4   33.89    2.26
  -6 -15   4   34.70    2.54
  -6 -15   4   34.50    2.78
  -6 -15   4   33.65    2.62
  -6 -15   4   29.74    2.32
  -6  15   3   25.78    2.08
  -6 -15   3   25.34    2.25
  -6 -15   3   22.72    2.28
  -6 -15   3   19.77    2.06
  -6  15   2  138.56    4.97
  -6 -15   2  138.98    5.72
  -6 -15   2  135.36    5.69
  -6  15   2  138.72    5.28
  -6  15   1    8.64    1.29
   6 -15  -1    8.64    1.29
  -6 -15   1    9.97    1.48
  -6 -15   1   11.48    1.70
  -6  15   1   10.20    1.52
  -6  15   0    1.15    0.74
   6 -15   0    0.05    0.65
  -6 -15   0    0.40    0.71
   6 -15   0   -0.37    0.71
  -6  15   0    0.48    0.69
  -6  15  -1    9.99    1.23
   6 -15   1    8.71    1.34
   6 -15   1    7.52    1.24
  -6 -15  -1    9.73    1.55
   6 -15   1   10.10    1.50
   6 -15   1    8.48    1.37
  -6  15  -1    8.50    1.40
   6 -15   2   34.05    2.47
   6 -15   2   41.16    2.69
   6 -15   2   38.77    2.73
   6 -15   2   38.20    2.71
  -6  15  -2   36.86    2.73
  -6  15  -3   10.11    1.30
   6 -15   3   11.41    1.44
   6 -15   3    8.70    1.28
   6 -15   3   11.44    1.52
   6 -15   3    9.11    1.36
  -6  15  -3   12.10    1.59
  -6  15  -4  354.66    8.40
   6 -15   4  351.94    8.42
   6 -15   4  370.18    8.80
   6 -15   4  382.32    9.09
  -6  15  -4  380.57    9.02
  -6  15  -5    8.57    1.02
   6 -15   5   11.21    1.17
   6 -15   5   12.50    1.30
  -6  15  -5    9.28    1.11
   6 -15   6   32.80    1.65
  -6  16   7   33.00    1.48
  -6 -16   7   34.11    1.76
  -6  16   6   68.21    2.69
  -6 -16   6   67.15    3.12
  -6 -16   6   64.14    2.71
  -6 -16   6   67.69    2.75
  -6  16   5   35.40    2.11
  -6 -16   5   36.29    2.37
  -6 -16   5   31.87    2.40
  -6 -16   5   38.06    2.35
  -6  16   4   66.74    3.14
  -6 -16   4   69.31    3.51
  -6 -16   4   67.29    3.77
  -6 -16   4   69.16    3.62
  -6 -16   4   65.11    3.39
  -6  16   3   29.93    2.15
  -6 -16   3   30.90    2.39
  -6 -16   3   30.63    2.51
  -6 -16   3   29.90    2.45
  -6  16   2    3.10    0.88
  -6 -16   2    2.14    0.86
  -6 -16   2    2.92    1.08
  -6  16   2    2.72    0.81
  -6  16   1  149.97    5.13
   6 -16  -1  161.94    5.19
  -6 -16   1  155.62    5.42
  -6 -16   1  152.72    5.90
  -6  16   1  166.30    5.77
  -6  16   0   87.80    3.71
   6 -16   0   88.44    3.85
  -6 -16   0   93.98    4.12
  -6 -16   0   86.89    4.30
   6 -16   0   89.96    4.00
  -6  16   0   85.45    4.11
  -6  16  -1   89.74    3.58
   6 -16   1   91.26    4.01
   6 -16   1   90.38    3.83
  -6 -16  -1   91.29    4.11
   6 -16   1   98.44    4.25
   6 -16   1   93.63    4.05
  -6  16  -1   83.46    4.10
   6 -16   2   53.19    2.98
   6 -16   2   51.21    2.91
  -6 -16  -2   56.89    3.16
   6 -16   2   56.37    3.18
   6 -16   2   50.22    2.99
  -6  16  -2   54.73    3.21
   6 -16   3   21.56    1.84
   6 -16   3   19.39    1.75
   6 -16   3   21.76    1.91
   6 -16   3   22.40    1.95
  -6  16  -3   24.30    2.02
  -6  16  -4    0.82    0.58
   6 -16   4    0.25    0.51
   6 -16   4    0.48    0.67
   6 -16   4    0.83    0.61
  -6  16  -4    0.63    0.69
   6 -16   5   32.72    1.82
   6 -16   5   37.68    2.05
  -6  16  -5   33.20    1.90
  -6  17   6   64.48    2.42
  -6 -17   6   66.52    2.89
  -6 -17   6   58.54    2.40
  -6  17   5   84.25    3.15
  -6 -17   5   77.25    3.33
  -6 -17   5   80.90    3.66
  -6 -17   5   81.32    3.32
  -6  17   4    7.58    1.09
  -6 -17   4    7.55    1.20
  -6 -17   4    7.22    0.93
  -6 -17   4    6.28    1.22
  -6 -17   4    5.31    1.04
  -6  17   3  195.30    5.71
  -6 -17   3  201.88    6.28
  -6 -17   3  186.34    6.57
  -6 -17   3  201.68    6.46
  -6 -17   3  186.02    6.21
  -6  17   2   67.47    3.18
  -6 -17   2   67.37    3.50
  -6 -17   2   61.30    3.48
  -6 -17   2   59.14    3.38
  -6  17   1   10.63    1.31
   6 -17  -1   11.47    1.30
  -6 -17   1   13.66    1.70
  -6 -17   1   10.10    1.46
  -6  17   1   14.65    1.60
  -6  17   0   29.53    2.07
   6 -17   0   31.86    2.21
  -6 -17   0   30.63    2.42
   6 -17   0   32.89    2.26
  -6  17   0   33.56    2.44
  -6  17  -1   -0.58    0.57
   6 -17   1    0.04    0.59
   6 -17   1    1.51    0.63
  -6 -17  -1    0.61    0.65
  -6 -17  -1    0.55    0.68
   6 -17   1    0.03    0.61
  -6  17  -1    0.67    0.78
   6 -17   2    9.16    1.25
   6 -17   2   11.95    1.34
  -6 -17  -2   12.71    1.44
   6 -17   2    9.07    1.26
   6 -17   2    9.61    1.30
  -6  17  -2   11.57    1.45
   6 -17   3   18.59    1.62
  -6 -17  -3   20.07    1.63
   6 -17   3   17.45    1.66
   6 -17   3   18.94    1.66
  -6  17  -3   17.84    1.67
   6 -17   4   90.57    3.31
  -6 -17  -4   94.81    3.31
   6 -17   4   99.91    3.59
   6 -17   4   99.32    3.63
  -6  17  -4   97.93    3.63
   6 -17   5    1.22    0.42
   6 -17   5    1.62    0.53
  -6  17  -5    0.68    0.43
  -6  18   6    0.79    0.36
  -6 -18   6    0.43    0.44
  -6  18   5   11.30    1.09
  -6 -18   5   11.89    1.33
  -6 -18   5   10.37    1.12
  -6  18   4   15.80    1.38
  -6 -18   4   17.34    1.59
  -6 -18   4   16.43    1.29
  -6 -18   4   15.85    1.67
  -6 -18   4   15.46    1.50
  -6  18   3    6.06    0.95
  -6 -18   3    6.82    1.16
  -6 -18   3    6.23    1.24
  -6 -18   3    6.70    1.14
  -6  18   2   31.91    2.08
  -6 -18   2   31.40    2.30
  -6 -18   2   33.09    2.43
  -6 -18   2   29.79    2.21
  -6  18   1   93.50    3.65
   6 -18  -1   94.22    3.50
  -6 -18   1   87.18    4.04
  -6 -18   1   86.93    3.86
  -6  18   1   89.52    3.73
  -6  18   0   32.19    2.05
   6 -18   0   32.62    2.15
  -6 -18   0   35.40    2.38
   6 -18   0   33.46    2.14
  -6  18   0   34.70    2.34
  -6  18  -1   68.89    2.86
   6 -18   1   68.71    3.17
  -6 -18  -1   65.21    3.16
   6 -18   1   72.02    3.29
  -6  18  -1   62.57    3.18
   6 -18   2   64.74    3.00
  -6 -18  -2   60.78    2.86
   6 -18   2   64.74    3.07
   6 -18   2   68.42    3.04
  -6  18  -2   64.30    3.13
   6 -18   3    0.78    0.49
   6 -18   3    1.64    0.63
   6 -18   3    1.69    0.59
  -6  18  -3    1.13    0.64
   6 -18   4    2.06    0.58
   6 -18   4    1.91    0.60
   6 -18   4    1.73    0.59
  -6  18  -4    0.90    0.51
  -6  19   5    1.87    0.50
  -6 -19   5    1.22    0.60
  -6 -19   5    2.32    0.58
  -6  19   4   32.50    1.81
  -6 -19   4   36.79    2.11
  -6 -19   4   33.57    2.19
  -6 -19   4   30.83    1.63
  -6 -19   4   34.69    2.07
  -6  19   3   18.07    1.44
  -6 -19   3   19.97    1.69
  -6 -19   3   19.58    1.80
  -6 -19   3   17.73    1.60
  -6 -19   3   17.45    1.60
  -6  19   2    0.69    0.44
  -6 -19   2    0.67    0.65
  -6 -19   2    0.51    0.62
  -6 -19   2   -0.60    0.62
  -6  19   1    0.71    0.49
  -6 -19   1    0.06    0.56
  -6 -19   1   -0.71    0.67
  -6  19   0   27.22    1.77
   6 -19   0   29.45    1.88
  -6 -19   0   27.23    2.06
   6 -19   0   31.57    1.90
  -6  19   0   29.68    1.99
  -6  19  -1    9.94    1.02
   6 -19   1   10.13    1.19
   6 -19   1   12.13    1.26
  -6  19  -1   11.08    1.27
   6 -19   2   22.93    1.66
  -6  19  -2   21.94    1.69
   6 -19   3   50.30    2.30
   6 -19   3   54.27    2.45
   6 -19   3   50.13    2.25
  -6  19  -3   48.61    2.37
   6 -19   4   -0.19    0.35
  -6  19  -4    0.31    0.34
  -6  20   4   16.51    1.18
  -6 -20   4   15.22    1.26
  -6 -20   4   15.73    1.37
  -6 -20   4   19.30    1.41
  -6  20   3   19.10    1.37
  -6 -20   3   16.57    1.41
  -6 -20   3   17.40    1.55
  -6 -20   3   16.59    1.25
  -6 -20   3   16.42    1.47
   6  20  -2   50.91    2.21
  -6  20   2   54.25    2.42
  -6 -20   2   58.01    2.74
  -6 -20   2   51.87    2.76
  -6 -20   2   51.25    2.58
  -6  20   1   76.29    2.94
  -6 -20   1   76.81    3.28
  -6 -20   1   78.68    3.29
  -6  20   0   -0.06    0.39
   6 -20   0    0.10    0.43
  -6 -20   0    0.10    0.50
  -6  20   0   -0.20    0.49
  -6  20  -1    3.82    0.65
   6 -20   1    4.11    0.76
  -6 -20  -1    3.66    0.73
   6 -20   1    3.19    0.69
  -6  20  -1    3.63    0.75
   6 -20   2    4.44    0.78
   6 -20   2    3.94    0.74
  -6  20  -2    3.49    0.71
   6 -20   3   48.98    2.05
   6 -20   3   52.75    2.17
  -6  20  -3   50.94    2.15
  -6  21   4   59.53    2.03
   6  21  -3   14.11    1.00
  -6  21   3   14.37    1.08
  -6 -21   3   13.95    1.17
  -6 -21   3   14.84    1.27
  -6 -21   3   14.66    1.23
  -6  21   2   57.35    2.30
  -6 -21   2   58.99    2.56
  -6 -21   2   57.91    2.63
  -6 -21   2   54.98    2.40
  -6 -21   2   62.54    2.70
   6  21  -2   58.67    2.12
  -6  21   1    9.31    0.94
  -6 -21   1   10.04    1.10
  -6 -21   1    9.38    1.11
  -6 -21   1   11.59    1.13
  -6  21   0   95.43    2.99
  -6 -21   0  102.03    3.49
   6 -21   0   97.92    3.02
  -6 -21   0   93.78    3.34
  -6 -21   0   95.25    3.28
  -6  21  -1    0.61    0.36
   6 -21   1    0.20    0.43
  -6 -21  -1    0.52    0.42
  -6  21  -1    0.77    0.41
   6 -21   2   11.72    0.98
  -6  22   2   38.46    1.65
  -6 -22   2   40.20    1.84
  -6 -22   2   40.08    1.91
  -6  22   1   19.56    1.18
  -6 -22   1   23.15    1.43
  -6 -22   0    1.59    0.52
  -6 -22  -1    0.08    0.32
  -7   0   8  147.77    5.13
  -7   0   7    0.90    0.75
  -7   0   6  217.42    6.50
  -7   0   6  230.57    7.95
  -7   0   6  236.42    8.04
  -7   0   5    0.50    0.64
  -7   0   5    0.90    0.78
  -7   0   5    0.18    0.89
  -7   0   4   48.62    3.60
  -7   0   3   -0.22    0.83
   7   0  -3   -0.51    0.84
  -7   0   2  233.46    7.49
  -7   0   2  236.82    8.02
   7   0  -2  235.34    7.88
  -7   0   2  219.20    7.88
   7   0  -2  238.70    8.07
  -7   0   1    0.84    0.99
  -7   0   1   -0.59    0.71
   7   0  -1    0.02    0.80
  -7   0   1    0.46    0.86
  -7   0   0  311.22    8.71
  -7   0   0  310.52    9.03
   7   0   0  303.80    9.28
  -7   0  -1    1.07    0.77
   7   0   1    0.65    0.77
   7   0   1    0.25    0.80
  -7   0  -1   -0.64    0.68
   7   0   2  126.38    5.14
   7   0   2  112.65    5.10
   7   0   2  121.64    5.49
   7   0   3    5.15    1.24
   7   0   3   -0.71    0.73
   7   0   4    1.40    0.81
   7   0   4    3.50    1.04
   7   0   5    0.29    0.63
   7   0   5   -0.45    0.60
   7   0   6   26.25    1.95
   7   0   7    0.16    0.41
  -7   1   8   97.56    4.01
  -7  -1   8   92.78    3.98
  -7   1   7  280.17    7.34
  -7   1   7  300.70    8.65
  -7  -1   7  300.92    8.77
  -7  -1   6    3.56    0.90
  -7   1   6    3.91    0.95
  -7   1   6    3.51    1.02
  -7  -1   6    3.99    1.12
  -7  -1   6    2.45    0.95
  -7   1   6    4.50    1.22
  -7  -1   5   25.96    2.08
  -7   1   5   26.06    2.06
  -7   1   5   27.18    2.69
  -7  -1   5   30.85    2.81
  -7  -1   5   28.45    2.80
  -7   1   5   27.00    2.72
  -7  -1   4  224.52    7.22
  -7  -1   4  205.50    7.84
  -7   1   4  211.26    7.86
  -7  -1   3  234.47    7.44
  -7  -1   3  228.85    8.12
  -7   1   3  225.97    8.04
   7   1  -3  228.16    7.81
   7  -1  -3  242.64    7.88
  -7  -1   2  100.72    4.73
  -7  -1   2  101.50    4.63
  -7  -1   2  105.53    5.18
  -7   1   2  102.88    5.05
   7  -1  -2  104.05    4.95
  -7  -1   2  105.60    5.22
  -7   1   2  105.09    5.20
   7   1  -2  105.23    5.18
  -7   1   1   35.87    2.69
  -7  -1   1   38.76    2.82
  -7  -1   1   38.51    2.98
  -7   1   1   37.32    2.91
   7   1  -1   36.31    2.99
   7  -1  -1   32.51    2.75
  -7  -1   1   33.44    2.94
  -7  -1   0    9.62    1.70
  -7   1   0    9.67    1.43
  -7  -1   0   12.48    1.65
   7  -1   0    8.96    1.48
   7   1   0    9.49    1.60
   7  -1   0   10.61    1.68
  -7  -1   0   12.05    1.75
  -7   1   0   14.20    1.77
  -7   1  -1  296.59    8.22
  -7  -1  -1  287.44    8.43
   7  -1   1  270.47    8.37
  -7  -1  -1  280.34    8.17
  -7   1  -1  274.67    8.28
   7   1   1  262.79    8.58
   7  -1   1  277.33    8.76
   7   1   2   91.38    4.39
   7  -1   2   80.46    4.26
   7   1   2   90.36    4.67
   7  -1   2   91.22    4.67
   7   1   3    8.25    1.48
   7  -1   3    8.86    1.45
   7  -1   3    9.45    1.42
   7   1   3    6.35    1.31
   7  -1   3    8.85    1.50
   7   1   4    0.78    0.86
   7  -1   4   -0.41    0.78
   7   1   4    1.29    0.80
   7  -1   4    0.60    0.80
   7   1   5  101.86    4.44
   7  -1   5  103.32    4.36
   7   1   5   94.83    3.97
   7  -1   5  100.96    4.20
   7   1   6    5.56    1.01
   7  -1   6    5.84    0.93
   7   1   7    5.28    0.82
   7  -1   7    5.25    0.75
  -7   2   8    2.87    0.78
  -7  -2   8    0.47    0.61
  -7   2   7  105.01    4.03
  -7   2   7  105.56    4.72
  -7  -2   7  112.99    5.00
  -7   2   6   -0.18    0.56
  -7   2   6    0.12    0.67
  -7  -2   6    1.10    0.86
  -7  -2   6   -0.06    0.87
  -7   2   6   -0.54    0.76
  -7  -2   5  131.49    4.74
  -7   2   5  135.70    4.92
  -7   2   5  128.56    5.82
  -7  -2   5  131.51    6.10
  -7   2   5  136.44    6.07
  -7   2   4    8.10    1.21
  -7  -2   4    5.02    1.16
  -7  -2   4    6.11    1.52
  -7   2   4    8.03    1.60
   7   2  -4    5.67    1.18
  -7  -2   3   53.45    3.36
  -7  -2   3   54.74    3.79
  -7   2   3   50.96    3.62
   7   2  -3   59.28    3.83
   7  -2  -3   58.94    3.64
  -7  -2   2   63.80    3.78
  -7  -2   2   68.81    3.80
  -7  -2   2   62.54    3.95
  -7  -2   2   56.52    3.80
  -7   2   2   64.72    4.01
   7  -2  -2   62.67    3.77
   7   2  -2   67.51    4.12
  -7   2   1  279.90    7.99
  -7  -2   1  284.66    8.39
  -7  -2   1  267.99    8.46
  -7   2   1  267.95    8.46
   7   2  -1  264.61    8.63
  -7  -2   1  248.68    8.66
   7  -2  -1  266.08    8.41
   7   2  -1  281.87    9.04
  -7  -2   0   -0.53    0.99
  -7   2   0   -0.49    0.84
  -7  -2   0    0.80    0.71
   7  -2   0    0.09    0.91
   7   2   0   -1.22    0.91
  -7  -2   0    0.20    0.82
  -7   2   0    1.62    0.91
   7   2   1   77.64    4.03
   7  -2   1   80.82    4.24
   7   2   1   78.17    4.37
  -7   2  -1   71.91    3.97
   7  -2   1   83.48    4.46
   7   2   2   67.78    3.86
   7  -2   2   68.68    3.89
   7   2   2   68.04    4.08
  -7   2  -2   77.61    3.95
   7  -2   2   74.51    4.22
   7   2   3   49.45    3.33
   7  -2   3   48.14    3.18
   7   2   3   54.35    3.53
   7  -2   3   52.61    3.47
   7   2   4   38.51    2.90
   7  -2   4   37.52    2.69
   7  -2   4   37.94    2.64
   7   2   4   40.52    2.84
   7  -2   4   43.07    2.99
   7   2   4   44.57    2.94
   7   2   5   27.24    2.30
   7  -2   5   28.06    2.17
   7  -2   5   29.02    2.25
   7   2   6    0.52    0.59
   7  -2   6    1.48    0.64
   7   2   7    0.43    0.42
  -7   3   8    0.32    0.52
  -7  -3   8    1.12    0.63
  -7   3   7   11.54    1.32
  -7   3   7   14.08    1.68
  -7  -3   7   15.66    1.88
  -7   3   6   84.80    3.75
  -7   3   6   80.62    4.36
  -7  -3   6   95.05    4.88
  -7  -3   6   85.21    4.69
  -7   3   6   84.89    4.50
  -7   3   5  353.35    8.77
  -7   3   5  333.67    9.93
  -7  -3   5  348.46   10.58
  -7   3   5  347.92   10.29
  -7   3   4  100.00    4.06
  -7  -3   4   98.42    4.75
  -7  -3   4   88.19    4.95
  -7   3   4   93.59    4.96
   7   3  -4   92.14    4.68
  -7  -3   3    2.55    0.97
  -7  -3   3    2.16    1.10
  -7   3   3    1.66    0.90
   7   3  -3    2.30    1.13
   7  -3  -3    2.32    1.02
  -7  -3   2  298.00    8.92
  -7  -3   2  292.18    8.80
  -7  -3   2  293.76    9.23
  -7  -3   2  296.81    9.44
  -7   3   2  307.20    9.36
   7  -3  -2  306.92    8.97
   7   3  -2  314.98    9.64
  -7  -3   1   42.92    3.07
   7  -3  -1   42.37    3.01
  -7  -3   1   37.86    2.94
  -7  -3   1   38.15    3.16
  -7   3   1   39.92    3.04
   7  -3  -1   42.65    3.13
   7   3  -1   41.39    3.28
  -7  -3   0   39.07    2.93
   7  -3   0   33.82    2.73
  -7  -3   0   31.86    2.60
   7   3   0   34.17    2.93
  -7   3   0   37.21    2.92
   7  -3   0   37.17    2.96
  -7  -3   0   34.62    3.03
   7   3   0   36.57    3.09
   7   3   1   67.98    3.85
   7  -3   1   68.39    3.92
   7   3   1   57.12    3.78
   7  -3   1   65.74    3.99
  -7   3  -1   66.79    3.83
   7   3   2  193.56    6.90
   7  -3   2  192.24    6.86
   7   3   2  190.26    7.06
   7  -3   2  206.03    7.29
  -7   3  -2  208.14    6.83
   7   3   3  257.44    8.21
   7  -3   3  261.44    8.01
   7   3   3  262.62    8.22
   7  -3   3  273.67    8.47
   7   3   3  276.90    8.59
   7   3   4   79.75    4.20
   7  -3   4   75.99    3.79
   7   3   4   74.88    3.83
   7  -3   4   80.08    4.10
   7   3   4   78.07    3.90
   7   3   5   32.62    2.52
   7  -3   5   30.04    2.18
   7  -3   5   28.10    2.22
   7   3   6   30.80    2.14
   7  -3   6   31.07    1.95
   7  -3   6   28.68    1.82
   7   3   7   25.98    1.58
  -7   4   8   -0.07    0.49
  -7  -4   8   -0.20    0.57
  -7   4   7   13.77    1.42
  -7   4   7   12.33    1.57
  -7  -4   7   15.85    1.88
  -7   4   6   10.83    1.35
  -7   4   6   10.48    1.56
  -7  -4   6    9.72    1.63
  -7   4   6    8.39    1.49
  -7   4   5    1.33    0.77
  -7   4   5    0.51    0.68
  -7  -4   5    0.30    1.00
  -7   4   5    1.05    0.86
  -7   4   4   50.42    2.85
  -7   4   4   46.14    3.28
  -7  -4   4   44.12    2.93
  -7  -4   4   44.72    3.21
  -7  -4   4   39.65    3.31
  -7   4   4   47.53    3.46
  -7  -4   3   71.64    3.72
  -7  -4   3   72.21    4.08
  -7  -4   3   75.72    4.47
  -7   4   3   70.39    4.23
   7   4  -3   71.64    4.30
  -7  -4   2   -0.32    0.90
  -7  -4   2    0.81    0.67
  -7  -4   2    0.37    0.66
   7  -4  -2    0.60    0.79
  -7  -4   2    0.14    0.89
  -7   4   2    1.24    0.85
   7   4  -2    0.24    0.88
  -7  -4   1   48.13    3.25
   7  -4  -1   40.57    2.90
  -7  -4   1   40.12    3.01
  -7  -4   1   43.67    3.39
  -7   4   1   43.97    3.20
   7  -4  -1   41.32    3.03
   7   4  -1   47.64    3.55
  -7  -4   0    2.27    0.96
   7  -4   0    3.37    1.02
   7   4   0    1.18    0.88
   7  -4   0    2.46    1.09
  -7   4   0    0.07    0.73
   7   4   0    5.11    1.30
   7   4   1 1002.73   19.80
   7  -4   1  968.02   19.60
   7  -4   1  983.17   20.04
  -7   4  -1 1007.67   19.81
   7   4   1 1013.67   20.77
   7   4   2    3.83    1.08
   7  -4   2    4.99    1.28
   7   4   2    3.40    1.09
   7  -4   2    3.01    0.98
  -7   4  -2    4.52    1.18
   7   4   2    5.04    1.31
   7   4   3    7.93    1.55
   7  -4   3    7.21    1.37
   7   4   3    6.74    1.40
   7  -4   3    8.07    1.46
   7   4   3   10.63    1.70
  -7   4  -3    7.86    1.32
   7   4   4  143.41    5.72
   7  -4   4  131.73    5.12
   7   4   4  129.77    5.06
   7  -4   4  139.70    5.52
   7   4   5   21.10    2.01
   7  -4   5   20.73    1.89
   7   4   6   23.10    1.86
   7  -4   6   25.32    1.71
   7   4   7   -0.02    0.43
  -7   5   8   30.10    1.91
  -7  -5   8   34.38    2.23
  -7   5   7    9.15    1.16
  -7   5   7   10.28    1.34
  -7  -5   7    9.69    1.50
  -7   5   6    1.28    0.69
  -7   5   6    1.31    0.84
  -7  -5   6    1.41    0.89
  -7   5   6    0.89    0.72
  -7   5   5   24.34    2.01
  -7   5   5   28.12    2.51
  -7  -5   5   25.75    2.66
  -7   5   5   27.02    2.57
  -7   5   4    9.64    1.29
  -7   5   4    9.97    1.55
  -7  -5   4    9.85    1.40
  -7  -5   4    9.79    1.59
  -7  -5   4    8.89    1.67
  -7   5   4    8.69    1.60
  -7  -5   3  196.75    6.60
  -7  -5   3  192.69    7.04
  -7  -5   3  193.79    7.44
  -7   5   3  196.07    7.24
   7   5  -3  192.45    7.38
  -7  -5   2    3.71    1.05
  -7  -5   2    8.04    1.33
  -7  -5   2    4.81    1.22
   7  -5  -2    5.95    1.27
  -7  -5   2    5.71    1.35
  -7   5   2    5.88    1.26
   7   5  -2    5.56    1.39
  -7  -5   1   14.51    1.91
   7  -5  -1   14.09    1.82
   7  -5  -1   16.32    1.94
  -7  -5   1   13.52    1.84
  -7   5   1   14.27    1.88
   7   5  -1   13.42    2.03
  -7  -5   0 1241.45   23.03
   7  -5   0 1155.81   22.37
   7  -5   0 1149.12   22.64
  -7   5   0 1167.39   22.73
   7   5   0 1173.24   23.66
   7   5   1  294.21    8.85
   7  -5   1  287.92    8.68
   7   5   1  284.32    9.02
   7  -5   1  289.64    8.91
  -7   5  -1  300.11    8.88
   7   5   1  291.86    9.38
   7   5   2   16.78    2.04
   7  -5   2   16.63    1.96
   7   5   2   12.39    1.81
   7  -5   2   15.84    2.00
   7   5   2   16.75    2.11
  -7   5  -2   16.05    1.91
   7   5   3  183.01    6.76
   7  -5   3  174.32    6.34
   7   5   3  169.52    6.31
   7  -5   3  186.08    6.73
  -7   5  -3  187.59    6.30
   7   5   3  177.98    6.58
   7   5   4    0.14    0.76
   7  -5   4    0.66    0.60
   7  -5   4   -0.21    0.70
   7   5   5   31.58    2.45
   7  -5   5   25.71    1.92
   7  -5   5   30.73    2.28
   7   5   6    3.59    0.89
   7  -5   6    3.63    0.76
   7   5   7    1.61    0.50
  -7   6   8   34.46    1.83
  -7  -6   8   38.56    2.29
  -7   6   7   12.72    1.30
  -7   6   7   12.04    1.41
  -7  -6   7   11.59    1.56
  -7   6   6    1.13    0.74
  -7   6   6    1.67    0.77
  -7  -6   6    0.98    0.88
  -7   6   6    0.96    0.63
  -7   6   5   69.69    3.39
  -7  -6   5   66.00    4.20
  -7   6   5   67.12    3.95
  -7   6   4  206.20    6.24
  -7  -6   4  207.07    6.91
  -7  -6   4  209.72    7.44
  -7  -6   4  199.11    7.65
  -7   6   4  221.45    7.68
  -7   6   3    2.54    0.74
  -7  -6   3    2.85    0.97
  -7  -6   3    6.85    1.46
  -7  -6   3    4.73    1.32
  -7   6   3    3.94    1.14
   7   6  -3    3.06    1.25
  -7  -6   2  237.15    7.81
  -7  -6   2  227.34    7.26
  -7  -6   2  223.39    7.76
   7  -6  -2  228.63    7.13
  -7  -6   2  224.15    7.80
  -7   6   2  228.17    7.83
   7  -6  -2  243.50    7.50
   7   6  -2  229.14    8.26
  -7  -6   1  171.48    6.48
   7  -6  -1  160.06    5.96
  -7   6   1  159.50    6.31
   7  -6  -1  154.59    6.01
   7   6  -1  156.26    6.70
  -7  -6   0   89.62    4.61
   7  -6   0   84.09    4.29
   7  -6   0   79.35    4.31
  -7   6   0   92.32    4.61
   7   6   0   76.51    4.60
   7   6   1  668.15   15.36
   7  -6   1  688.02   15.21
   7  -6   1  688.63   15.54
  -7   6  -1  700.17   15.35
   7   6   1  689.93   16.10
   7   6   2   26.23    2.51
   7  -6   2   20.31    2.16
   7  -6   2   28.76    2.65
  -7   6  -2   31.26    2.61
   7   6   2   23.45    2.44
   7   6   3  237.39    7.88
   7  -6   3  247.83    7.67
   7  -6   3  244.51    7.88
  -7   6  -3  242.31    7.48
   7   6   3  243.31    7.81
   7   6   4   42.51    3.03
   7  -6   4   35.24    2.55
   7  -6   4   42.38    2.94
  -7   6  -4   40.88    2.57
   7   6   5    1.80    0.89
   7  -6   5    2.35    0.71
   7  -6   5    3.53    0.94
   7   6   6   32.39    2.12
   7  -6   6   28.39    1.80
  -7   7   8   44.23    2.02
  -7  -7   8   45.64    2.37
  -7   7   7    9.22    1.11
  -7  -7   7    9.22    1.37
  -7   7   6   16.01    1.56
  -7  -7   6   18.34    2.06
  -7   7   6   16.77    1.78
  -7   7   5   33.41    2.30
  -7  -7   5   26.45    2.22
  -7   7   5   32.42    2.66
  -7   7   4   48.30    2.78
  -7  -7   4   46.62    2.78
  -7  -7   4   44.78    3.06
  -7  -7   4   43.96    3.24
  -7  -7   4   43.44    3.42
  -7   7   4   48.65    3.41
  -7   7   3  147.41    4.97
  -7  -7   3  150.89    5.78
  -7  -7   3  137.12    5.94
  -7  -7   3  138.05    6.08
  -7   7   3  134.22    5.84
  -7  -7   2   42.78    3.14
  -7  -7   2   44.23    3.02
  -7  -7   2   43.85    3.27
  -7  -7   2   36.52    2.95
   7  -7  -2   43.60    2.86
  -7   7   2   38.27    3.05
   7   7  -2   38.05    3.25
  -7  -7   1  528.28   12.80
   7  -7  -1  508.31   12.15
   7  -7  -1  515.23   12.34
  -7   7   1  505.64   12.72
   7   7  -1  511.67   13.54
  -7  -7   0  258.34    8.23
   7  -7   0  237.61    7.64
   7  -7   0  238.30    7.80
  -7   7   0  239.88    7.89
   7   7   0  228.60    8.36
   7   7   1    5.52    1.32
   7  -7   1    6.62    1.53
   7  -7   1    8.03    1.57
   7   7   1    5.83    1.45
  -7   7  -1    5.08    1.25
   7   7   2   -0.81    0.92
   7  -7   2    1.54    0.95
   7  -7   2    1.82    0.94
   7   7   2    1.42    0.87
  -7   7  -2    0.67    0.71
   7   7   3    6.78    1.38
   7  -7   3    6.61    1.36
   7  -7   3    5.78    1.33
   7   7   3    6.33    1.30
  -7   7  -3    6.57    1.29
   7   7   4   34.43    2.72
   7  -7   4   35.19    2.53
   7  -7   4   41.85    2.87
  -7   7  -4   41.28    2.61
   7   7   5   11.80    1.54
   7  -7   5   12.69    1.33
   7  -7   5   15.64    1.61
   7   7   6    6.45    0.96
   7  -7   6    4.48    0.78
  -7   8   8  194.19    4.69
  -7  -8   8  204.83    5.22
  -7   8   7    1.30    0.58
  -7  -8   7    1.20    0.61
  -7   8   6   64.18    3.03
  -7  -8   6   60.90    3.61
  -7  -8   6   62.47    3.10
  -7   8   6   59.14    3.18
  -7   8   5   73.28    3.43
  -7  -8   5   75.45    3.80
  -7   8   5   71.82    3.90
  -7   8   4    0.03    0.57
  -7  -8   4    0.38    0.63
  -7  -8   4    0.23    0.80
  -7  -8   4    1.08    0.92
  -7   8   4    0.34    0.71
  -7   8   3  219.35    6.29
  -7  -8   3  211.08    6.44
  -7  -8   3  211.19    7.10
  -7  -8   3  218.69    7.68
  -7  -8   3  193.73    7.31
  -7   8   3  205.93    7.31
  -7  -8   2  172.02    5.69
  -7  -8   2  184.45    6.74
  -7  -8   2  177.84    6.42
  -7  -8   2  175.90    6.85
  -7  -8   2  161.59    6.37
   7  -8  -2  174.58    5.98
  -7   8   2  184.96    6.77
   7   8  -2  171.59    7.11
  -7  -8   1  146.12    5.96
   7  -8  -1  135.30    5.38
   7  -8  -1  144.84    5.62
  -7   8   1  134.64    5.76
   7   8  -1  128.94    6.12
  -7  -8   0  375.39   10.33
   7  -8   0  342.63    9.55
   7  -8   0  364.05    9.95
  -7   8   0  359.61   10.08
   7   8   0  337.57   10.53
   7  -8   1    1.17    0.90
   7  -8   1    2.47    1.09
   7  -8   1    1.06    0.97
   7   8   1    2.03    1.02
  -7   8  -1    2.87    1.19
   7   8   2  109.77    5.17
   7  -8   2  116.35    5.06
   7  -8   2  107.87    5.00
  -7   8  -2  106.97    4.88
   7   8   2  102.82    5.07
   7   8   3    2.87    1.02
   7  -8   3    3.25    1.02
   7  -8   3    4.31    1.17
   7   8   3    2.84    0.86
  -7   8  -3    1.57    0.86
   7   8   4   97.52    4.55
   7  -8   4   91.93    4.09
   7  -8   4   96.20    4.40
  -7   8  -4  103.37    4.19
   7   8   5    0.79    0.68
   7  -8   5    1.89    0.59
   7  -8   5    1.18    0.74
   7   8   6    0.44    0.54
   7  -8   6   -0.24    0.52
  -7   9   8    5.88    0.69
  -7   9   7   28.87    1.79
  -7  -9   7   25.14    1.96
  -7   9   6    0.95    0.60
  -7  -9   6    0.11    0.62
  -7  -9   6    0.88    0.63
  -7   9   5    2.59    0.83
  -7  -9   5    1.46    0.87
  -7   9   5    1.39    0.77
  -7   9   4    0.56    0.57
  -7  -9   4    0.53    0.65
  -7  -9   4   -0.49    0.82
  -7  -9   4    0.21    0.78
  -7   9   4    0.93    0.75
  -7   9   3    4.48    0.93
  -7  -9   3    4.27    0.94
  -7  -9   3    2.40    0.89
  -7  -9   3    5.00    1.35
  -7   9   3    3.55    1.01
  -7  -9   2   62.13    3.26
  -7  -9   2   62.57    3.79
  -7  -9   2   53.58    3.43
  -7  -9   2   55.81    3.76
   7  -9  -2   59.03    3.26
  -7   9   2   53.03    3.52
  -7  -9   1  103.80    4.90
   7  -9  -1   94.58    4.39
   7  -9  -1   97.28    4.49
  -7   9   1   95.42    4.77
   7   9  -1   93.79    5.15
   7  -9   0   51.29    3.07
  -7  -9   0   62.56    3.82
   7  -9   0   53.76    3.39
   7  -9   0   58.30    3.54
  -7   9   0   54.78    3.57
   7   9   0   52.29    3.79
   7  -9   1  409.94   10.19
   7  -9   1  414.86   10.69
   7  -9   1  417.88   10.84
  -7   9  -1  415.75   10.91
   7   9   1  388.10   11.26
   7  -9   2  242.96    7.36
   7   9   2  231.90    7.93
   7  -9   2  256.09    7.82
   7  -9   2  254.41    7.99
  -7   9  -2  255.83    7.88
   7   9   2  235.57    7.93
   7   9   3    1.80    0.95
   7  -9   3    0.95    0.72
   7  -9   3    2.31    1.01
  -7   9  -3    1.81    0.76
   7   9   4   44.13    2.96
   7  -9   4   44.14    2.72
   7  -9   4   42.64    2.85
  -7   9  -4   45.07    2.71
   7   9   5    3.17    0.92
   7  -9   5    2.56    0.69
   7  -9   5    1.56    0.66
  -7   9  -5    1.24    0.54
   7   9   6   48.86    2.39
   7  -9   6   49.25    2.21
  -7  10   7   68.46    2.71
[truncated: 46,445 more chars]
